# Supplementary material
Source: publisher figshare collection journal article supplement (https://acs.figshare.com/ndownloader/files/3984499)
Supplement: Supplementary file 1 [file 3984499]

data_qiuyf0802
_audit_creation_date              2013-08-08
_audit_creation_method
;
  Olex2 1.2
  (compiled Apr 23 2013 17:54:37, GUI svn.r4466)
;
_publ_contact_author_address      ?
_publ_contact_author_email        ?
_publ_contact_author_name         ''
_publ_contact_author_phone        ?
_chemical_name_common             ?
_chemical_name_systematic
;
 ?
;
_chemical_formula_moiety          'C17 H12 O2'
_chemical_formula_sum             'C17 H12 O2'
_chemical_formula_weight          248.27
_chemical_melting_point           ?
loop_
  _atom_type_symbol
  _atom_type_description
  _atom_type_scat_dispersion_real
  _atom_type_scat_dispersion_imag
  _atom_type_scat_source
 'C' 'C' 0.0033 0.0016 'International Tables Vol C Tables 4.2.6.8 and 6.1.1.4'
 'H' 'H' 0.0000 0.0000 'International Tables Vol C Tables 4.2.6.8 and 6.1.1.4'
 'O' 'O' 0.0106 0.0060 'International Tables Vol C Tables 4.2.6.8 and 6.1.1.4'

_space_group_crystal_system       'monoclinic'
_space_group_IT_number            14
_space_group_name_H-M_alt         'P 1 21/n 1'
_space_group_name_Hall            '-P 2yn'
loop_
  _space_group_symop_operation_xyz
 'x, y, z'
 '-x+1/2, y+1/2, -z+1/2'
 '-x, -y, -z'
 'x-1/2, -y-1/2, z-1/2'

_cell_length_a                    21.8697(14)
_cell_length_b                    5.5982(4)
_cell_length_c                    22.380(3)
_cell_angle_alpha                 90
_cell_angle_beta                  108.856(10)
_cell_angle_gamma                 90
_cell_volume                      2592.9(4)
_cell_formula_units_Z             8
_cell_measurement_reflns_used     2213
_cell_measurement_temperature     293(2)
_cell_measurement_theta_max       23.4220
_cell_measurement_theta_min       3.7140
_exptl_absorpt_coefficient_mu     0.083
_exptl_absorpt_correction_T_max   1.00000
_exptl_absorpt_correction_T_min   0.32762
_exptl_absorpt_correction_type    multi-scan
_exptl_absorpt_process_details
;
CrysAlisPro, Agilent Technologies,
Version 1.171.36.28 (release 01-02-2013 CrysAlis171 .NET)
(compiled Feb  1 2013,16:14:44)
Empirical absorption correction using spherical harmonics,
 implemented in SCALE3 ABSPACK scaling algorithm.
;
_exptl_crystal_colour             'clear light yellow'
_exptl_crystal_density_diffrn     1.272
_exptl_crystal_density_meas       ?
_exptl_crystal_density_method     ?
_exptl_crystal_description        block
_exptl_crystal_F_000              1040
_exptl_crystal_size_max           0.34
_exptl_crystal_size_mid           0.17
_exptl_crystal_size_min           0.14
_exptl_special_details
;
 ?
;
_exptl_transmission_factor_max    ?
_exptl_transmission_factor_min    ?
_diffrn_reflns_av_R_equivalents   0.0463
_diffrn_reflns_av_unetI/netI      0.0696
_diffrn_reflns_Laue_measured_fraction_full 0.998
_diffrn_reflns_Laue_measured_fraction_max 0.998
_diffrn_reflns_limit_h_max        26
_diffrn_reflns_limit_h_min        -26
_diffrn_reflns_limit_k_max        6
_diffrn_reflns_limit_k_min        -6
_diffrn_reflns_limit_l_max        27
_diffrn_reflns_limit_l_min        -27
_diffrn_reflns_number             11281
_diffrn_reflns_point_group_measured_fraction_full 0.998
_diffrn_reflns_point_group_measured_fraction_max 0.998
_diffrn_reflns_theta_full         25.500
_diffrn_reflns_theta_max          26.018
_diffrn_reflns_theta_min          3.166
_diffrn_ambient_temperature       293(2)
_diffrn_detector_area_resol_mean  16.0733
_diffrn_measured_fraction_theta_full 0.9973
_diffrn_measured_fraction_theta_max 0.8880
_diffrn_measurement_details
;
#__ type_ start__ end____ width___ exp.time_
  1 omega  -85.00  -55.00   1.5000   14.0000
omega____ theta____ kappa____ phi______ frames
    -      -19.3700  178.0000 -180.0000 20

#__ type_ start__ end____ width___ exp.time_
  2 omega    6.00   85.50   1.5000   14.0000
omega____ theta____ kappa____ phi______ frames
    -       22.6512   57.0000    0.0000 53

#__ type_ start__ end____ width___ exp.time_
  3 omega  -47.00  -11.00   1.5000   14.0000
omega____ theta____ kappa____ phi______ frames
    -       22.6512  -57.0000   90.0000 24

#__ type_ start__ end____ width___ exp.time_
  4 omega    9.00   45.00   1.5000   14.0000
omega____ theta____ kappa____ phi______ frames
    -       22.6512  -57.0000   90.0000 24

#__ type_ start__ end____ width___ exp.time_
  5 omega   -4.00   95.00   1.5000   14.0000
omega____ theta____ kappa____ phi______ frames
    -       22.6512   77.0000   60.0000 66
;
_diffrn_measurement_device_type   'SuperNova, Dual, Cu at zero, Eos'
_diffrn_measurement_method        '\w scans'
_diffrn_orient_matrix_UB_11       0.0300233000
_diffrn_orient_matrix_UB_12       0.0503453000
_diffrn_orient_matrix_UB_13       0.0181733000
_diffrn_orient_matrix_UB_21       -0.0078250000
_diffrn_orient_matrix_UB_22       -0.0202100000
_diffrn_orient_matrix_UB_23       0.0279751000
_diffrn_orient_matrix_UB_31       0.0145813000
_diffrn_orient_matrix_UB_32       -0.1145357000
_diffrn_orient_matrix_UB_33       0.0030755000
_diffrn_radiation_monochromator   mirror
_diffrn_radiation_type            'Mo K\a'
_diffrn_radiation_wavelength      0.7107
_diffrn_source                    'SuperNova (Mo) X-ray Source'
_reflns_Friedel_coverage          0.000
_reflns_Friedel_fraction_full     .
_reflns_Friedel_fraction_max      .
_reflns_number_gt                 2750
_reflns_number_total              5080
_reflns_odcompleteness_completeness 99.73
_reflns_odcompleteness_iscentric  1
_reflns_odcompleteness_theta      26.32
_reflns_special_details
;
 Reflections were merged by SHELXL according to the crystal
 class for the calculation of statistics and refinement.
 
 _reflns_Friedel_fraction is defined as the number of unique
 Friedel pairs measured divided by the number that would be
 possible theoretically, ignoring centric projections and
 systematic absences.
;
_reflns_threshold_expression      'I > 2\s(I)'
_computing_cell_refinement
;
CrysAlisPro, Agilent Technologies,
Version 1.171.36.28 (release 01-02-2013 CrysAlis171 .NET)
(compiled Feb  1 2013,16:14:44)
;
_computing_data_collection
;
CrysAlisPro, Agilent Technologies,
Version 1.171.36.28 (release 01-02-2013 CrysAlis171 .NET)
(compiled Feb  1 2013,16:14:44)
;
_computing_data_reduction
;
CrysAlisPro, Agilent Technologies,
Version 1.171.36.28 (release 01-02-2013 CrysAlis171 .NET)
(compiled Feb  1 2013,16:14:44)
;
_computing_molecular_graphics
;
O. V. Dolomanov, L. J. Bourhis, R. J. Gildea, J. A. K. Howard and H. Puschmann,
OLEX2: a complete structure solution, refinement and analysis program.
J. Appl. Cryst. (2009). 42, 339-341.
;
_computing_publication_material
;
O. V. Dolomanov, L. J. Bourhis, R. J. Gildea, J. A. K. Howard and H. Puschmann,
OLEX2: a complete structure solution, refinement and analysis program.
J. Appl. Cryst. (2009). 42, 339-341.
;
_computing_structure_refinement
;
SHELXL, G.M. Sheldrick, Acta Cryst.
(2008). A64, 112-122
;
_computing_structure_solution
'SUPERFLIP, J. Appl. Cryst. (2007) 40, 786-790'
_refine_diff_density_max          1.298
_refine_diff_density_min          -0.210
_refine_diff_density_rms          0.065
_refine_ls_extinction_coef        0.007(2)
_refine_ls_extinction_expression  'Fc^*^=kFc[1+0.001xFc^2^\l^3^/sin(2\q)]^-1/4^'
_refine_ls_extinction_method      SHELXL
_refine_ls_goodness_of_fit_ref    1.032
_refine_ls_hydrogen_treatment     constr
_refine_ls_matrix_type            full
_refine_ls_number_parameters      344
_refine_ls_number_reflns          5080
_refine_ls_number_restraints      0
_refine_ls_R_factor_all           0.1359
_refine_ls_R_factor_gt            0.0852
_refine_ls_restrained_S_all       1.032
_refine_ls_shift/su_max           0.000
_refine_ls_shift/su_mean          0.000
_refine_ls_structure_factor_coef  Fsqd
_refine_ls_weighting_details
;
 w=1/[\s^2^(Fo^2^)+(0.1480P)^2^+0.6702P]
 where P=(Fo^2^+2Fc^2^)/3
;
_refine_ls_weighting_scheme       calc
_refine_ls_wR_factor_gt           0.2411
_refine_ls_wR_factor_ref          0.2926
_refine_special_details
;
 ?
;
_olex2_refinement_description
;
1. Fixed Uiso
 At 1.2 times of:
  All C(H) groups
2.a Aromatic/amide H refined with riding coordinates:
 C1(H1), C2(H2), C3(H3), C4(H4), C5(H5), C8(H8), C10(H10), C13(H13), C14(H14),
 C15(H15), C16(H16), C17(H17), C18(H18), C19(H19), C20(H20), C21(H21), C22(H22),
  C25(H25), C27(H27), C30(H30), C31(H31), C32(H32), C33(H33), C34(H34)
;
_atom_sites_solution_hydrogens    geom
_atom_sites_solution_primary      iterative
_atom_sites_solution_secondary    ?
loop_
  _atom_site_label
  _atom_site_type_symbol
  _atom_site_fract_x
  _atom_site_fract_y
  _atom_site_fract_z
  _atom_site_U_iso_or_equiv
  _atom_site_adp_type
  _atom_site_occupancy
  _atom_site_site_symmetry_order
  _atom_site_calc_flag
  _atom_site_refinement_flags_posn
  _atom_site_refinement_flags_adp
  _atom_site_refinement_flags_occupancy
  _atom_site_disorder_assembly
  _atom_site_disorder_group
 O1 O 0.49537(14) 0.1979(7) 0.55893(17) 0.0997(12) Uani 1 1 d . . . . .
 O2 O 0.30608(11) 0.2066(4) 0.45699(11) 0.0512(7) Uani 1 1 d . . . . .
 O3 O 0.55458(13) 0.2970(5) 0.00324(12) 0.0646(8) Uani 1 1 d . . . . .
 O4 O 0.55271(11) 0.3625(4) 0.18265(11) 0.0518(7) Uani 1 1 d . . . . .
 C1 C 0.34307(19) 0.7249(7) 0.37636(19) 0.0609(10) Uani 1 1 d . . . . .
 H1 H 0.3876 0.7401 0.3944 0.073 Uiso 1 1 calc R U . . .
 C2 C 0.3094(2) 0.8866(7) 0.3317(2) 0.0642(11) Uani 1 1 d . . . . .
 H2 H 0.3315 1.0097 0.3196 0.077 Uiso 1 1 calc R U . . .
 C3 C 0.2438(2) 0.8687(8) 0.3047(2) 0.0652(11) Uani 1 1 d . . . . .
 H3 H 0.2213 0.9801 0.2748 0.078 Uiso 1 1 calc R U . . .
 C4 C 0.21139(19) 0.6858(8) 0.32202(19) 0.0640(11) Uani 1 1 d . . . . .
 H4 H 0.1668 0.6728 0.3037 0.077 Uiso 1 1 calc R U . . .
 C5 C 0.24450(17) 0.5215(7) 0.36635(18) 0.0581(10) Uani 1 1 d . . . . .
 H5 H 0.2221 0.3973 0.3775 0.070 Uiso 1 1 calc R U . . .
 C6 C 0.31114(16) 0.5386(7) 0.39480(16) 0.0500(9) Uani 1 1 d . . . . .
 C7 C 0.34664(16) 0.3686(7) 0.44480(17) 0.0516(9) Uani 1 1 d . . . . .
 C8 C 0.40962(19) 0.3711(8) 0.4773(2) 0.0684(12) Uani 1 1 d . . . . .
 H8 H 0.4360 0.4861 0.4682 0.082 Uiso 1 1 calc R U . . .
 C9 C 0.43747(18) 0.1978(8) 0.5265(2) 0.0695(12) Uani 1 1 d . . . . .
 C10 C 0.39225(18) 0.0309(8) 0.53690(19) 0.0632(11) Uani 1 1 d . . . . .
 H10 H 0.4069 -0.0855 0.5679 0.076 Uiso 1 1 calc R U . . .
 C11 C 0.32948(17) 0.0389(7) 0.50302(17) 0.0506(9) Uani 1 1 d . . . . .
 C12 C 0.27747(17) -0.1184(6) 0.50894(17) 0.0491(9) Uani 1 1 d . . . . .
 C13 C 0.2914(2) -0.3186(7) 0.5464(2) 0.0638(11) Uani 1 1 d . . . . .
 H13 H 0.3340 -0.3530 0.5696 0.077 Uiso 1 1 calc R U . . .
 C14 C 0.2422(2) -0.4707(8) 0.5498(2) 0.0714(12) Uani 1 1 d . . . . .
 H14 H 0.2523 -0.6089 0.5740 0.086 Uiso 1 1 calc R U . . .
 C15 C 0.1793(2) -0.4172(8) 0.5176(2) 0.0740(13) Uani 1 1 d . . . . .
 H15 H 0.1465 -0.5179 0.5203 0.089 Uiso 1 1 calc R U . . .
 C16 C 0.1646(2) -0.2161(9) 0.4815(2) 0.0732(12) Uani 1 1 d . . . . .
 H16 H 0.1217 -0.1786 0.4599 0.088 Uiso 1 1 calc R U . . .
 C17 C 0.21338(18) -0.0682(7) 0.4772(2) 0.0621(11) Uani 1 1 d . . . . .
 H17 H 0.2029 0.0684 0.4524 0.074 Uiso 1 1 calc R U . . .
 C18 C 0.65850(18) 0.8755(7) 0.1909(2) 0.0617(10) Uani 1 1 d . . . . .
 H18 H 0.6596 0.8845 0.1498 0.074 Uiso 1 1 calc R U . . .
 C19 C 0.6914(2) 1.0424(8) 0.2347(2) 0.0760(13) Uani 1 1 d . . . . .
 H19 H 0.7150 1.1620 0.2232 0.091 Uiso 1 1 calc R U . . .
 C20 C 0.6893(2) 1.0317(9) 0.2951(3) 0.0810(14) Uani 1 1 d . . . . .
 H20 H 0.7114 1.1454 0.3245 0.097 Uiso 1 1 calc R U . . .
 C21 C 0.6556(2) 0.8575(9) 0.3126(2) 0.0807(14) Uani 1 1 d . . . . .
 H21 H 0.6543 0.8534 0.3537 0.097 Uiso 1 1 calc R U . . .
 C22 C 0.6227(2) 0.6839(8) 0.2691(2) 0.0689(11) Uani 1 1 d . . . . .
 H22 H 0.6004 0.5627 0.2816 0.083 Uiso 1 1 calc R U . . .
 C23 C 0.62329(16) 0.6921(7) 0.20746(18) 0.0521(9) Uani 1 1 d . . . . .
 C24 C 0.58837(16) 0.5175(6) 0.16002(17) 0.0480(9) Uani 1 1 d . . . . .
 C25 C 0.58876(18) 0.4995(7) 0.10033(17) 0.0549(9) Uani 1 1 d . . . . .
 H25 H 0.6130 0.6081 0.0859 0.066 Uiso 1 1 calc R U . . .
 C26 C 0.55320(17) 0.3191(7) 0.05817(17) 0.0516(9) Uani 1 1 d . . . . .
 C27 C 0.51634(16) 0.1633(6) 0.08456(17) 0.0495(9) Uani 1 1 d . . . . .
 H27 H 0.4911 0.0442 0.0594 0.059 Uiso 1 1 calc R U . . .
 C28 C 0.51749(16) 0.1858(6) 0.14469(18) 0.0481(9) Uani 1 1 d . . . . .
 C29 C 0.48435(16) 0.0346(7) 0.17818(17) 0.0519(9) Uani 1 1 d . . . . .
 C30 C 0.44833(18) -0.1621(7) 0.1477(2) 0.0593(10) Uani 1 1 d . . . . .
 H30 H 0.4432 -0.1927 0.1055 0.071 Uiso 1 1 calc R U . . .
 C31 C 0.4203(2) -0.3115(8) 0.1810(2) 0.0712(12) Uani 1 1 d . . . . .
 H31 H 0.3957 -0.4403 0.1602 0.085 Uiso 1 1 calc R U . . .
 C32 C 0.4276(2) -0.2761(9) 0.2430(2) 0.0734(13) Uani 1 1 d . . . . .
 H32 H 0.4099 -0.3826 0.2647 0.088 Uiso 1 1 calc R U . . .
 C33 C 0.4615(2) -0.0807(9) 0.2728(2) 0.0763(13) Uani 1 1 d . . . . .
 H33 H 0.4653 -0.0513 0.3147 0.092 Uiso 1 1 calc R U . . .
 C34 C 0.49025(19) 0.0742(8) 0.2416(2) 0.0664(11) Uani 1 1 d . . . . .
 H34 H 0.5136 0.2049 0.2628 0.080 Uiso 1 1 calc R U . . .

loop_
  _atom_site_aniso_label
  _atom_site_aniso_U_11
  _atom_site_aniso_U_22
  _atom_site_aniso_U_33
  _atom_site_aniso_U_23
  _atom_site_aniso_U_13
  _atom_site_aniso_U_12
 O1 0.0509(17) 0.140(3) 0.095(2) 0.039(2) 0.0060(15) -0.0158(18)
 O2 0.0443(13) 0.0568(16) 0.0537(15) 0.0003(12) 0.0174(11) -0.0075(11)
 O3 0.0784(19) 0.0693(18) 0.0525(16) -0.0106(13) 0.0301(14) -0.0047(14)
 O4 0.0538(14) 0.0554(15) 0.0482(14) 0.0009(12) 0.0194(11) 0.0031(12)
 C1 0.053(2) 0.069(3) 0.063(2) -0.001(2) 0.0235(18) -0.0067(19)
 C2 0.068(3) 0.061(3) 0.069(3) 0.007(2) 0.030(2) -0.003(2)
 C3 0.074(3) 0.062(3) 0.060(2) 0.005(2) 0.023(2) 0.007(2)
 C4 0.052(2) 0.071(3) 0.064(3) -0.004(2) 0.0119(19) 0.002(2)
 C5 0.054(2) 0.064(2) 0.060(2) -0.003(2) 0.0227(18) -0.0095(18)
 C6 0.0488(19) 0.057(2) 0.047(2) -0.0076(16) 0.0187(16) -0.0047(17)
 C7 0.0467(19) 0.060(2) 0.052(2) -0.0041(18) 0.0215(16) -0.0063(17)
 C8 0.051(2) 0.086(3) 0.067(3) 0.017(2) 0.0177(19) -0.014(2)
 C9 0.046(2) 0.094(3) 0.065(3) 0.011(2) 0.0136(19) -0.011(2)
 C10 0.051(2) 0.081(3) 0.055(2) 0.016(2) 0.0143(18) -0.003(2)
 C11 0.052(2) 0.056(2) 0.047(2) -0.0031(17) 0.0194(16) -0.0038(17)
 C12 0.054(2) 0.047(2) 0.053(2) -0.0029(17) 0.0258(17) -0.0043(16)
 C13 0.061(2) 0.066(3) 0.069(3) -0.001(2) 0.027(2) 0.000(2)
 C14 0.090(3) 0.059(3) 0.074(3) 0.002(2) 0.039(3) -0.012(2)
 C15 0.078(3) 0.072(3) 0.084(3) -0.010(2) 0.042(3) -0.025(2)
 C16 0.062(3) 0.081(3) 0.082(3) -0.007(3) 0.030(2) -0.020(2)
 C17 0.056(2) 0.063(3) 0.069(3) 0.000(2) 0.0227(19) -0.0071(19)
 C18 0.056(2) 0.058(2) 0.065(3) -0.004(2) 0.0105(18) 0.0025(19)
 C19 0.066(3) 0.065(3) 0.082(3) -0.009(2) 0.004(2) 0.005(2)
 C20 0.073(3) 0.073(3) 0.082(4) -0.026(3) 0.004(3) 0.000(2)
 C21 0.088(3) 0.095(4) 0.052(3) -0.017(2) 0.013(2) 0.008(3)
 C22 0.072(3) 0.074(3) 0.060(3) -0.010(2) 0.021(2) 0.006(2)
 C23 0.0470(19) 0.053(2) 0.053(2) -0.0053(17) 0.0120(16) 0.0093(17)
 C24 0.0459(19) 0.045(2) 0.052(2) 0.0041(16) 0.0144(16) 0.0066(16)
 C25 0.060(2) 0.055(2) 0.051(2) -0.0030(18) 0.0212(18) -0.0045(18)
 C26 0.054(2) 0.053(2) 0.050(2) -0.0035(17) 0.0196(17) 0.0077(17)
 C27 0.0461(19) 0.053(2) 0.049(2) -0.0042(16) 0.0146(16) 0.0030(16)
 C28 0.0421(18) 0.044(2) 0.057(2) -0.0010(16) 0.0139(16) 0.0037(15)
 C29 0.0441(19) 0.059(2) 0.054(2) 0.0083(18) 0.0173(16) 0.0096(17)
 C30 0.057(2) 0.063(3) 0.060(2) 0.0060(19) 0.0221(18) 0.0035(19)
 C31 0.062(3) 0.071(3) 0.083(3) 0.009(2) 0.027(2) 0.000(2)
 C32 0.063(3) 0.086(3) 0.079(3) 0.018(3) 0.033(2) 0.002(2)
 C33 0.073(3) 0.103(4) 0.059(3) 0.013(3) 0.031(2) 0.005(3)
 C34 0.058(2) 0.081(3) 0.063(3) 0.005(2) 0.023(2) -0.003(2)

_geom_special_details
;
 All esds (except the esd in the dihedral angle between two l.s. planes)
 are estimated using the full covariance matrix.  The cell esds are taken
 into account individually in the estimation of esds in distances, angles
 and torsion angles; correlations between esds in cell parameters are only
 used when they are defined by crystal symmetry.  An approximate (isotropic)
 treatment of cell esds is used for estimating esds involving l.s. planes.
;
loop_
  _geom_bond_atom_site_label_1
  _geom_bond_atom_site_label_2
  _geom_bond_distance
  _geom_bond_site_symmetry_2
  _geom_bond_publ_flag
 O1 C9 1.239(4) . ?
 O2 C7 1.357(4) . ?
 O2 C11 1.365(4) . ?
 O3 C26 1.246(4) . ?
 O4 C24 1.369(4) . ?
 O4 C28 1.368(4) . ?
 C1 H1 0.9300 . ?
 C1 C2 1.374(6) . ?
 C1 C6 1.390(5) . ?
 C2 H2 0.9300 . ?
 C2 C3 1.370(6) . ?
 C3 H3 0.9300 . ?
 C3 C4 1.370(6) . ?
 C4 H4 0.9300 . ?
 C4 C5 1.375(5) . ?
 C5 H5 0.9300 . ?
 C5 C6 1.392(5) . ?
 C6 C7 1.483(5) . ?
 C7 C8 1.334(5) . ?
 C8 H8 0.9300 . ?
 C8 C9 1.446(6) . ?
 C9 C10 1.434(5) . ?
 C10 H10 0.9300 . ?
 C10 C11 1.337(5) . ?
 C11 C12 1.478(5) . ?
 C12 C13 1.373(5) . ?
 C12 C17 1.380(5) . ?
 C13 H13 0.9300 . ?
 C13 C14 1.393(6) . ?
 C14 H14 0.9300 . ?
 C14 C15 1.364(6) . ?
 C15 H15 0.9300 . ?
 C15 C16 1.362(6) . ?
 C16 H16 0.9300 . ?
 C16 C17 1.378(5) . ?
 C17 H17 0.9300 . ?
 C18 H18 0.9300 . ?
 C18 C19 1.377(6) . ?
 C18 C23 1.403(5) . ?
 C19 H19 0.9300 . ?
 C19 C20 1.370(7) . ?
 C20 H20 0.9300 . ?
 C20 C21 1.355(7) . ?
 C21 H21 0.9300 . ?
 C21 C22 1.400(6) . ?
 C22 H22 0.9300 . ?
 C22 C23 1.384(6) . ?
 C23 C24 1.463(5) . ?
 C24 C25 1.342(5) . ?
 C25 H25 0.9300 . ?
 C25 C26 1.429(5) . ?
 C26 C27 1.438(5) . ?
 C27 H27 0.9300 . ?
 C27 C28 1.344(5) . ?
 C28 C29 1.468(5) . ?
 C29 C30 1.397(5) . ?
 C29 C34 1.400(5) . ?
 C30 H30 0.9300 . ?
 C30 C31 1.387(6) . ?
 C31 H31 0.9300 . ?
 C31 C32 1.358(6) . ?
 C32 H32 0.9300 . ?
 C32 C33 1.368(6) . ?
 C33 H33 0.9300 . ?
 C33 C34 1.385(6) . ?
 C34 H34 0.9300 . ?

loop_
  _geom_angle_atom_site_label_1
  _geom_angle_atom_site_label_2
  _geom_angle_atom_site_label_3
  _geom_angle
  _geom_angle_site_symmetry_1
  _geom_angle_site_symmetry_3
  _geom_angle_publ_flag
 C7 O2 C11 120.1(3) . . ?
 C28 O4 C24 120.2(3) . . ?
 C2 C1 H1 119.7 . . ?
 C2 C1 C6 120.6(4) . . ?
 C6 C1 H1 119.7 . . ?
 C1 C2 H2 119.6 . . ?
 C3 C2 C1 120.8(4) . . ?
 C3 C2 H2 119.6 . . ?
 C2 C3 H3 120.2 . . ?
 C2 C3 C4 119.6(4) . . ?
 C4 C3 H3 120.2 . . ?
 C3 C4 H4 119.9 . . ?
 C3 C4 C5 120.3(4) . . ?
 C5 C4 H4 119.9 . . ?
 C4 C5 H5 119.6 . . ?
 C4 C5 C6 120.9(4) . . ?
 C6 C5 H5 119.6 . . ?
 C1 C6 C5 117.9(4) . . ?
 C1 C6 C7 121.0(3) . . ?
 C5 C6 C7 121.1(3) . . ?
 O2 C7 C6 111.3(3) . . ?
 C8 C7 O2 121.6(3) . . ?
 C8 C7 C6 127.0(3) . . ?
 C7 C8 H8 119.5 . . ?
 C7 C8 C9 121.0(4) . . ?
 C9 C8 H8 119.5 . . ?
 O1 C9 C8 123.0(4) . . ?
 O1 C9 C10 122.2(4) . . ?
 C10 C9 C8 114.7(3) . . ?
 C9 C10 H10 119.3 . . ?
 C11 C10 C9 121.4(4) . . ?
 C11 C10 H10 119.3 . . ?
 O2 C11 C12 111.4(3) . . ?
 C10 C11 O2 121.1(3) . . ?
 C10 C11 C12 127.4(3) . . ?
 C13 C12 C11 121.1(3) . . ?
 C13 C12 C17 117.9(3) . . ?
 C17 C12 C11 121.1(3) . . ?
 C12 C13 H13 119.7 . . ?
 C12 C13 C14 120.7(4) . . ?
 C14 C13 H13 119.7 . . ?
 C13 C14 H14 119.9 . . ?
 C15 C14 C13 120.1(4) . . ?
 C15 C14 H14 119.9 . . ?
 C14 C15 H15 120.1 . . ?
 C16 C15 C14 119.9(4) . . ?
 C16 C15 H15 120.1 . . ?
 C15 C16 H16 120.0 . . ?
 C15 C16 C17 119.9(4) . . ?
 C17 C16 H16 120.0 . . ?
 C12 C17 H17 119.3 . . ?
 C16 C17 C12 121.5(4) . . ?
 C16 C17 H17 119.3 . . ?
 C19 C18 H18 119.5 . . ?
 C19 C18 C23 121.0(4) . . ?
 C23 C18 H18 119.5 . . ?
 C18 C19 H19 120.1 . . ?
 C20 C19 C18 119.7(5) . . ?
 C20 C19 H19 120.1 . . ?
 C19 C20 H20 119.6 . . ?
 C21 C20 C19 120.8(4) . . ?
 C21 C20 H20 119.6 . . ?
 C20 C21 H21 119.9 . . ?
 C20 C21 C22 120.3(5) . . ?
 C22 C21 H21 119.9 . . ?
 C21 C22 H22 119.9 . . ?
 C23 C22 C21 120.2(4) . . ?
 C23 C22 H22 119.9 . . ?
 C18 C23 C24 120.0(3) . . ?
 C22 C23 C18 118.0(4) . . ?
 C22 C23 C24 122.0(4) . . ?
 O4 C24 C23 112.4(3) . . ?
 C25 C24 O4 120.5(3) . . ?
 C25 C24 C23 127.0(3) . . ?
 C24 C25 H25 118.9 . . ?
 C24 C25 C26 122.2(4) . . ?
 C26 C25 H25 118.9 . . ?
 O3 C26 C25 122.7(4) . . ?
 O3 C26 C27 122.7(3) . . ?
 C25 C26 C27 114.6(3) . . ?
 C26 C27 H27 119.2 . . ?
 C28 C27 C26 121.5(3) . . ?
 C28 C27 H27 119.2 . . ?
 O4 C28 C29 111.8(3) . . ?
 C27 C28 O4 120.9(3) . . ?
 C27 C28 C29 127.2(3) . . ?
 C30 C29 C28 119.9(3) . . ?
 C30 C29 C34 118.2(4) . . ?
 C34 C29 C28 121.8(4) . . ?
 C29 C30 H30 120.3 . . ?
 C31 C30 C29 119.4(4) . . ?
 C31 C30 H30 120.3 . . ?
 C30 C31 H31 118.9 . . ?
 C32 C31 C30 122.3(4) . . ?
 C32 C31 H31 118.9 . . ?
 C31 C32 H32 120.6 . . ?
 C31 C32 C33 118.7(4) . . ?
 C33 C32 H32 120.6 . . ?
 C32 C33 H33 119.4 . . ?
 C32 C33 C34 121.2(4) . . ?
 C34 C33 H33 119.4 . . ?
 C29 C34 H34 119.9 . . ?
 C33 C34 C29 120.2(4) . . ?
 C33 C34 H34 119.9 . . ?

loop_
  _geom_torsion_atom_site_label_1
  _geom_torsion_atom_site_label_2
  _geom_torsion_atom_site_label_3
  _geom_torsion_atom_site_label_4
  _geom_torsion
  _geom_torsion_site_symmetry_1
  _geom_torsion_site_symmetry_2
  _geom_torsion_site_symmetry_3
  _geom_torsion_site_symmetry_4
  _geom_torsion_publ_flag
 O1 C9 C10 C11 177.5(4) . . . . ?
 O2 C7 C8 C9 0.9(6) . . . . ?
 O2 C11 C12 C13 171.2(3) . . . . ?
 O2 C11 C12 C17 -9.0(5) . . . . ?
 O3 C26 C27 C28 177.6(3) . . . . ?
 O4 C24 C25 C26 -0.7(5) . . . . ?
 O4 C28 C29 C30 -177.1(3) . . . . ?
 O4 C28 C29 C34 -0.4(5) . . . . ?
 C1 C2 C3 C4 -0.7(6) . . . . ?
 C1 C6 C7 O2 177.8(3) . . . . ?
 C1 C6 C7 C8 0.6(6) . . . . ?
 C2 C1 C6 C5 0.3(6) . . . . ?
 C2 C1 C6 C7 -177.6(4) . . . . ?
 C2 C3 C4 C5 0.2(6) . . . . ?
 C3 C4 C5 C6 0.5(6) . . . . ?
 C4 C5 C6 C1 -0.8(6) . . . . ?
 C4 C5 C6 C7 177.1(4) . . . . ?
 C5 C6 C7 O2 0.0(5) . . . . ?
 C5 C6 C7 C8 -177.2(4) . . . . ?
 C6 C1 C2 C3 0.5(6) . . . . ?
 C6 C7 C8 C9 177.9(4) . . . . ?
 C7 O2 C11 C10 0.2(5) . . . . ?
 C7 O2 C11 C12 179.6(3) . . . . ?
 C7 C8 C9 O1 -177.9(5) . . . . ?
 C7 C8 C9 C10 -0.6(7) . . . . ?
 C8 C9 C10 C11 0.1(6) . . . . ?
 C9 C10 C11 O2 0.1(6) . . . . ?
 C9 C10 C11 C12 -179.2(4) . . . . ?
 C10 C11 C12 C13 -9.4(6) . . . . ?
 C10 C11 C12 C17 170.4(4) . . . . ?
 C11 O2 C7 C6 -178.1(3) . . . . ?
 C11 O2 C7 C8 -0.7(5) . . . . ?
 C11 C12 C13 C14 -177.6(3) . . . . ?
 C11 C12 C17 C16 178.8(4) . . . . ?
 C12 C13 C14 C15 -2.4(6) . . . . ?
 C13 C12 C17 C16 -1.4(6) . . . . ?
 C13 C14 C15 C16 0.7(7) . . . . ?
 C14 C15 C16 C17 0.5(7) . . . . ?
 C15 C16 C17 C12 -0.2(7) . . . . ?
 C17 C12 C13 C14 2.7(6) . . . . ?
 C18 C19 C20 C21 0.5(7) . . . . ?
 C18 C23 C24 O4 -175.3(3) . . . . ?
 C18 C23 C24 C25 4.7(6) . . . . ?
 C19 C18 C23 C22 0.0(6) . . . . ?
 C19 C18 C23 C24 179.7(3) . . . . ?
 C19 C20 C21 C22 0.6(7) . . . . ?
 C20 C21 C22 C23 -1.4(7) . . . . ?
 C21 C22 C23 C18 1.1(6) . . . . ?
 C21 C22 C23 C24 -178.6(4) . . . . ?
 C22 C23 C24 O4 4.4(5) . . . . ?
 C22 C23 C24 C25 -175.6(4) . . . . ?
 C23 C18 C19 C20 -0.8(6) . . . . ?
 C23 C24 C25 C26 179.2(3) . . . . ?
 C24 O4 C28 C27 -1.1(5) . . . . ?
 C24 O4 C28 C29 178.3(3) . . . . ?
 C24 C25 C26 O3 -178.1(3) . . . . ?
 C24 C25 C26 C27 1.2(5) . . . . ?
 C25 C26 C27 C28 -1.6(5) . . . . ?
 C26 C27 C28 O4 1.7(5) . . . . ?
 C26 C27 C28 C29 -177.6(3) . . . . ?
 C27 C28 C29 C30 2.2(5) . . . . ?
 C27 C28 C29 C34 178.9(3) . . . . ?
 C28 O4 C24 C23 -179.3(3) . . . . ?
 C28 O4 C24 C25 0.6(5) . . . . ?
 C28 C29 C30 C31 176.3(3) . . . . ?
 C28 C29 C34 C33 -176.1(4) . . . . ?
 C29 C30 C31 C32 -1.3(6) . . . . ?
 C30 C29 C34 C33 0.7(5) . . . . ?
 C30 C31 C32 C33 2.8(6) . . . . ?
 C31 C32 C33 C34 -2.6(7) . . . . ?
 C32 C33 C34 C29 0.9(6) . . . . ?
 C34 C29 C30 C31 -0.5(5) . . . . ?

_shelx_estimated_absorpt_T_max    ?
_shelx_estimated_absorpt_T_min    ?
_shelx_hkl_checksum               58056
_shelx_hkl_file
;
   0   0  -4 567876. 5168.21   5
   0   0  -5 226.789 203.515   5
   0   0  -6 337154. 4847.17   5
   0   0  -7 1915.78 433.581   5
   0   0  -8 31165.8 1691.93   5
   0   0  -9 308.345 202.559   5
   0   0 -10 1618.49 436.524   5
   0   0 -11 1941.42 542.292   5
   0   0 -12 5745.22 949.936   5
   0   0 -13 7005.90 1082.96   5
   0   0 -14 30257.7 2225.47   5
   0   0 -15 7832.34 1185.97   5
   0   0 -16 21739.8 2017.44   5
   0   0 -17 3782.23 909.215   5
   0   0 -18 3712.13 899.508   5
   0   0 -19 3409.94 872.482   5
   0   0 -20 4362.58 1037.46   5
   0   0 -21 3263.07 932.802   5
   0   0 -22 8604.96 1529.47   5
   0   0 -23 2770.67 905.567   5
   0   0 -24 2547.02 853.329   5
   0   0 -25 975.983 552.467   5
   0   0 -26 270.649 272.900   5
   0   0 -27 668.421 478.794   5
   0  -1   0 17.5798 52.9960   4
   0  -1  -1 20592.7 962.411   4
   0   1   1 19890.7 871.854   1
   0   1  -1 20182.8 831.586   5
   0   1   2 120227. 2097.75   1
   0   1  -2 120749. 2301.52   5
   0   1  -3 6374.43 584.200   5
   0   1   3 5931.06 425.950   5
   0  -1   3 6164.43 571.158   3
   0  -1  -3 6842.38 495.020   1
   0   1  -4 23746.0 1233.44   5
   0  -1   4 24087.7 1181.58   3
   0  -1  -4 23134.4 934.152   5
   0  -1   4 23385.0 745.152   2
   0   1   4 23376.5 977.236   5
   0  -1   5 260710. 4107.40   3
   0   1  -5 261614. 4394.23   5
   0  -1  -5 264344. 3551.57   5
   0   1   5 256504. 3702.62   5
   0  -1   5 259375. 3049.98   2
   0  -1   6 79.7655 182.419   3
   0  -1  -6 164.143 35.5819   5
   0   1   6 122.354 63.4545   5
   0  -1   6 104.557 40.6831   2
   0   1  -6 117.596 54.1971   5
   0  -1   7 851.777 287.901   3
   0   1   7 693.695 239.300   5
   0   1  -7 645.733 231.380   5
   0  -1   7 547.172 194.196   2
   0  -1  -7 945.468 246.163   5
   0  -1  -8 6499.26 721.774   5
   0  -1   8 5224.56 637.799   2
   0   1  -8 5974.80 790.862   5
   0  -1   8 6262.49 737.659   3
   0  -1  -9 15.3652 119.862   5
   0  -1   9 199.865 174.974   3
   0   1  -9 42.6103 78.3123   5
   0   1 -10 6439.41 926.120   5
   0  -1 -10 5996.38 788.874   5
   0   1 -11 52271.3 2713.10   5
   0  -1 -11 50050.2 2417.19   5
   0  -1 -12 2631.08 576.576   5
   0   1 -12 2101.83 559.346   5
   0   1 -13 239.718 213.526   5
   0  -1 -13 420.863 269.040   5
   0   1 -14 5875.18 1032.64   5
   0  -1 -14 6642.83 991.839   5
   0   1 -15-26.9667 265.620   5
   0  -1 -15-62.8320 86.1112   5
   0  -1 -16-55.0542 81.2875   5
   0   1 -16 261.539 235.869   5
   0   1 -17 311.641 241.692   5
   0  -1 -17 524.912 355.910   5
   0   1 -18 18761.6 2069.69   5
   0  -1 -18 16802.7 1821.64   5
   0  -1 -19 4960.58 1013.82   5
   0   1 -19 5565.02 1159.38   5
   0   1 -20 553.476 445.770   5
   0  -1 -20 1164.11 566.680   5
   0  -1 -21 265.965 271.984   5
   0  -1  21-186.034 355.879   3
   0   1 -21 737.708 483.563   5
   0  -1 -22 436.226 300.569   5
   0   1 -22-183.384 336.421   5
   0  -1  22 744.335 798.822   3
   0   1 -23-256.920 245.716   5
   0  -1  23 1047.62 814.309   3
   0  -1 -23 399.908 291.197   5
   0   1 -24 227.028 257.401   5
   0  -1  24 648.724 620.683   3
   0  -1 -24 655.028 427.972   5
   0   1 -25 1386.70 667.315   5
   0  -1 -25 738.309 392.808   5
   0  -1  25 1314.52 975.457   3
   0   1 -26 445.488 425.344   5
   0  -1 -26 849.370 445.775   5
   0  -1 -27 240.098 249.261   5
   0   2   0 8857.34 699.005   5
   0  -2   0 8763.41 870.212   4
   0  -2  -1 2976.00 519.055   4
   0  -2   1 3255.97 545.357   4
   0   2  -1 4484.48 518.881   5
   0  -2   2 14559.4 1166.96   4
   0  -2  -2 13184.1 1092.99   4
   0   2  -2 15024.2 1015.34   5
   0   2  -3 58810.0 2130.75   5
   0   2  -3 57784.5 1098.67   2
   0   2   4 5082.49 513.302   5
   0   2  -4 4128.86 602.393   5
   0  -2  -4 4312.50 549.961   1
   0   2   5 4837.82 517.100   5
   0  -2  -5 5550.92 631.510   1
   0   2  -5 4392.40 657.237   5
   0  -2   6 9.84265 15.1978   2
   0   2   6 30.1081 69.0938   5
   0  -2   6 18.1849 85.0919   3
   0  -2  -6 150.199 171.431   1
   0   2  -6 50.7292 124.672   5
   0  -2   7 241606. 5309.06   3
   0   2   7 216950. 4018.03   5
   0  -2   7 219158. 2740.37   2
   0  -2  -7 241899. 4322.46   1
   0   2  -7 239104. 5236.64   5
   0  -2   8 9152.67 653.748   2
   0  -2   8 10652.9 1133.71   3
   0   2  -8 8361.78 1030.60   5
   0  -2  -9 695.097 239.399   5
   0  -2   9 658.288 224.004   3
   0  -2   9 497.135 176.698   2
   0   2  -9 523.971 226.128   5
   0   2 -10 7237.72 1047.12   5
   0  -2  10 6089.93 880.357   3
   0  -2 -10 7117.80 837.512   5
   0  -2  10 6131.99 680.052   2
   0  -2  11 5609.93 897.940   3
   0   2 -11 7173.67 1091.97   5
   0  -2 -11 6823.53 862.533   5
   0  -2  12 2601.50 656.551   3
   0  -2 -12 3484.77 628.378   5
   0   2 -12 2658.93 692.502   5
   0  -2  13 87.9320 237.829   3
   0   2 -13 230.423 246.203   5
   0  -2 -13 76.7631 70.4849   5
   0  -2  14 1327.89 506.819   3
   0   2 -14 1469.87 592.774   5
   0  -2 -14 1143.37 395.218   5
   0   2 -15 7450.91 1247.59   5
   0  -2  15 6771.38 1128.22   3
   0  -2 -15 4335.10 787.521   5
   0   2 -16 5346.16 1064.92   5
   0  -2  16 4737.04 981.476   3
   0  -2 -16 4227.02 802.569   5
   0  -2 -17 2014.97 572.725   5
   0  -2  17 1744.00 667.453   3
   0   2 -17 1711.48 634.487   5
   0  -2  18 751.631 431.282   3
   0  -2 -18 704.561 356.502   5
   0   2 -18 438.970 153.650   5
   0  -2 -19 186.842 277.852   5
   0  -2  19 4.75279 354.019   3
   0   2 -19 433.870 359.340   5
   0  -2 -20-25.8207 88.3243   5
   0   2 -20 386.894 446.086   5
   0  -2  20 476.583 500.354   3
   0  -2  21 1855.16 786.579   3
   0  -2 -21 777.855 419.716   5
   0   2 -21 655.795 496.731   5
   0   2 -22 515.568 403.710   5
   0  -2 -22 12.2130 128.107   5
   0  -2 -23 2005.44 686.589   5
   0  -2  23 1780.82 901.246   3
   0   2 -23 2073.56 797.737   5
   0   2 -24 336.834 305.376   5
   0  -2  24-476.387 417.743   3
   0   2 -25 1386.59 670.818   5
   0  -2  25 74.9335 294.341   3
   0  -2  26-346.546 567.763   3
   0  -3   0-95.2600 171.048   4
   0   3   0-70.0284 113.206   5
   0  -3   1 2813.74 627.583   4
   0   3  -1 3710.18 584.496   5
   0  -3  -1 3422.61 673.872   4
   0   3   1 3535.20 520.130   5
   0  -3   2 103.256 116.215   4
   0   3  -2 758.774 273.002   5
   0  -3  -2 753.791 292.585   4
   0  -3   3 6164.24 966.153   4
   0   3  -3 6438.56 819.742   5
   0   3  -4 27884.2 1788.45   5
   0  -3   4 31818.2 2190.66   4
   0   3  -4 27468.3 872.088   2
   0   3   5 33371.0 1573.46   5
   0   3  -5 33872.9 2034.66   5
   0   3   6 4029.65 546.743   5
   0   3  -6 4747.53 797.601   5
   0  -3  -7 4291.05 683.666   1
   0   3   7 3103.91 491.218   5
   0   3  -7 3945.16 767.011   5
   0  -3  -8 6958.38 870.935   1
   0   3  -8 7285.06 1042.92   5
   0   3  -9 901.272 419.208   5
   0  -3  -9 1760.50 434.741   1
   0   3 -10 48.0036 108.328   5
   0  -3 -10 305.147 184.042   1
   0   3 -11 3241.84 799.154   5
   0  -3 -11 3204.00 598.248   1
   0  -3  11 2811.79 710.909   3
   0  -3 -12 462.616 242.798   1
   0  -3  12-169.081 406.340   3
   0   3 -12 80.5463 218.809   5
   0   3 -13 6342.02 1163.17   5
   0  -3  13 6407.89 1088.35   3
   0  -3 -13 6735.12 898.981   1
   0  -3 -14-46.7522 62.7669   1
   0  -3  14-85.1880 220.675   3
   0   3 -14-53.7852 123.523   5
   0  -3 -15 2365.28 575.497   1
   0  -3  15 1899.64 694.545   3
   0   3 -15 3111.82 867.191   5
   0  -3  16 9611.38 1545.25   3
   0   3 -16 6658.49 1313.28   5
   0   3 -17 9199.70 1570.71   5
   0  -3  17 10151.7 1604.93   3
   0   3 -18 231.277 284.114   5
   0  -3  18 640.575 536.184   3
   0  -3  19 732.590 393.429   3
   0   3 -19 83.1898 131.145   5
   0   3 -20 3374.13 996.691   5
   0  -3  20 4610.39 1214.27   3
   0   3 -21-280.042 338.793   5
   0  -3  21-275.766 395.416   3
   0  -3  22-746.487 612.492   3
   0   3 -22 505.683 457.420   5
   0   3 -23 208.142 247.124   5
   0  -3  23-574.884 677.044   3
   0  -3  24-609.532 558.135   3
   0  -3  25-158.639 436.324   3
   0  -4   0 37.0296 149.940   4
   0   4   0 104.123 154.052   5
   0  -4  -1-36.9061 162.771   4
   0  -4   1 196.952 202.577   4
   0   4   1 178.570 154.657   5
   0   4  -1 44.3297 120.100   5
   0  -4   2 2871.53 738.942   4
   0   4  -2 3033.55 622.901   5
   0   4   2 3189.34 561.806   5
   0  -4  -2 2846.92 714.542   4
   0   4   3 784.105 257.839   5
   0   4  -3 980.637 413.738   5
   0  -4   3 822.569 431.211   4
   0  -4   4 1400.60 518.165   4
   0   4  -4 687.026 315.780   5
   0   4   4 1113.67 316.320   5
   0   4  -4 770.551 183.652   2
   0   4  -5-128.273 173.484   5
   0  -4   5-125.598 97.0186   4
   0   4  -6 5485.68 928.238   5
   0  -4   6 4812.85 991.301   4
   0   4  -7 1026.05 461.656   5
   0   4  -8 15899.4 1713.13   5
   0   4  -9-121.279 250.997   5
   0   4 -10 1105.32 481.429   5
   0   4 -11 714.558 462.988   5
   0  -4 -11 592.144 280.402   1
   0   4 -12 647.880 405.258   5
   0  -4 -12 442.495 235.955   1
   0  -4 -13-70.7606 164.591   1
   0   4 -13 244.497 208.005   5
   0  -4 -14 41.5130 95.7057   1
   0   4 -14 99.8582 161.044   5
   0   4 -15 2246.31 774.733   5
   0   4 -16 829.041 470.857   5
   0   4 -17 120.461 201.246   5
   0   4 -18 115.850 284.093   5
   0  -4  19-414.340 390.380   3
   0   4 -19 317.935 441.368   5
   0   4 -20 1121.31 587.216   5
   0  -4  20 747.614 546.963   3
   0  -4  21 1299.51 788.367   3
   0   4 -21 150.455 242.511   5
   0  -4  22 130.004 131.753   3
   0  -4  23-269.495 601.105   3
   0  -5   0-78.0716 295.227   4
   0   5   0-113.686 190.370   5
   0  -5  -1 2482.11 793.403   4
   0   5  -1 2476.59 601.129   5
   0  -5   1 2446.25 724.272   4
   0  -5   2 227.558 277.590   4
   0   5  -2 65.6748 141.768   5
   0  -5  -2-100.639 242.932   4
   0  -5   3 8748.80 1456.00   4
   0   5  -3 8065.07 1172.37   5
   0  -5   4 901.551 460.684   4
   0   5  -4 377.557 197.181   5
   0   5  -5 2577.25 705.227   5
   0  -5   5 3082.98 884.965   4
   0   5  -6 360.875 277.691   5
   0  -5   6 972.104 448.822   4
   0  -5   7 290.536 274.715   4
   0   5  -7 576.967 290.077   5
   0  -5   8 564.191 333.324   4
   0   5  -8 146.631 224.425   5
   0   5  -9 207.315 201.591   5
   0  -5   9 22.3589 209.687   4
   0  -5  10 4914.69 1203.92   4
   0   5 -10 4498.43 1034.09   5
   0   5 -11 123.007 330.168   5
   0   5 -12 557.623 448.002   5
   0   5 -13 507.379 465.539   5
   0   5 -14 128.193 229.284   5
   0   5 -15 326.957 295.549   5
   0   5 -16 326.063 302.885   5
   0   5 -17 45.8245 202.856   5
   0   5 -18-164.670 253.853   5
   0   5 -19 209.180 352.428   5
   0  -6   0 8660.83 1594.69   4
   0  -6   1 13926.2 2030.68   4
   0  -6   2-224.019 372.362   4
   0  -6   3 2240.98 795.027   4
   0  -6   4 1750.80 740.598   4
   0  -6   5 2499.37 882.267   4
   0  -6   6 76.4431 194.093   4
   0  -6   7 830.099 559.787   4
   0  -6   8 3412.17 1083.87   4
   0  -6   9 1212.29 693.752   4
   0  -6  10 492.357 517.263   4
   0   6 -10-110.244 189.506   5
   0   6 -11 864.302 540.739   5
   0  -6  11-280.152 235.280   4
   0  -6  12 359.345 96.0198   4
   0   6 -12 80.4513 107.709   5
   0  -6  13 189.609 314.900   4
   0   6 -13 196.951 301.815   5
   0   6 -14-120.454 326.106   5
   0  -6  14 763.465 603.575   4
   0   6 -15 1206.36 695.191   5
   0  -6  15 2101.75 959.320   4
   0  -6  16-316.889 393.522   4
   0   6 -16 171.026 317.617   5
   0  -7   2 408.819 439.411   4
   0  -7   3 1265.79 698.673   4
   0  -7   4 287.554 356.370   4
   0  -7   5 180.666 148.167   4
   0  -7   6 388.264 386.743   4
   0  -7   7 326.257 388.603   4
   0  -7   8-8.41153 152.982   4
   0  -7   9 71.4708 227.771   4
   0  -7  10-46.6677 167.983   4
   1   0 -28-76.4742 246.547   5
   1   0 -27 341.575 344.896   5
   1   0 -26 210.333 328.399   5
   1   0 -25 219.769 265.458   5
   1   0 -24 289.118 85.0342   5
   1   0 -23 211.696 246.796   5
   1   0 -22 428.752 315.108   5
   1   0 -21 10378.8 1606.71   5
   1   0 -20 207.903 306.762   5
   1   0 -19 335.354 399.929   5
   1   0 -18 122.985 211.999   5
   1   0 -17-45.9018 122.637   5
   1   0 -16 312.050 247.783   5
   1   0 -15 15098.4 1603.17   5
   1   0 -14 190.286 124.505   5
   1   0 -13 14664.8 1461.86   5
   1   0 -12-74.6636 126.026   5
   1   0 -11 130442. 4018.79   5
   1   0 -10 142.248 186.490   5
   1   0  -9 57530.5 2410.43   5
   1   0  -8 58.5664 129.937   5
   1   0  -7 71356.4 2398.42   5
   1   0  -6-18.9452 93.0261   5
   1   0  -5 332771. 4341.84   5
   1   0  -4 12.6729 52.1838   5
  -1   0  -3 123774. 2234.48   2
  -1   0  -4-7.05429 44.3022   5
  -1   0  -5 28341.6 1300.34   5
  -1   0  -6 14.7373 38.3519   5
  -1   0  -7 16679.4 1171.47   5
  -1   0  -8 44.5694 124.442   5
  -1   0  -9 6057.21 791.708   5
  -1   0 -10-17.1299 117.481   5
  -1   0 -11 112268. 3770.45   5
  -1   0 -12 76.9924 110.817   5
  -1   0 -13 30402.0 2142.21   5
  -1   0 -14 197.696 241.461   5
  -1   0 -15 2568.04 698.172   5
  -1   0 -16-2.32376 94.5677   5
  -1   0 -17 117.779 204.931   5
  -1   0 -18-216.902 200.553   5
  -1   0 -19 92.2066 154.847   5
  -1   0 -20-127.217 158.408   5
  -1   0 -21 447.531 341.478   5
  -1   0 -22-260.094 427.046   5
  -1   0 -23 842.352 500.632   5
  -1   0 -24 262.630 400.877   5
  -1   0 -25 727.649 447.208   5
  -1   0 -26 69.8818 204.384   5
  -1   0 -27 787.386 527.781   5
   1  -1 -28 284.288 296.146   5
   1   1 -27 801.262 565.601   5
  -1  -1  27 946.061 1291.49   3
   1  -1 -27 368.581 341.233   5
   1   1 -26 769.964 551.683   5
  -1  -1  26 1226.29 1033.73   3
   1  -1 -26 373.714 374.784   5
   1   1 -25 421.986 355.766   5
  -1  -1  25 157.059 342.478   3
   1  -1 -25 628.213 420.812   5
   1  -1 -24-219.484 247.138   5
   1   1 -24-141.949 281.497   5
  -1  -1  24 270.998 408.456   3
   1   1 -23 316.362 356.429   5
   1  -1 -23 289.212 169.064   5
   1   1 -22 327.329 154.363   5
   1  -1 -22-36.3357 175.236   5
   1  -1 -21 1831.02 654.951   5
   1   1 -21 2056.97 742.487   5
  -1  -1  20 3335.14 1061.88   3
   1   1 -20 1887.02 708.070   5
   1  -1 -20 1407.36 511.262   5
   1   1 -19-271.808 339.695   5
   1  -1 -19 205.976 265.010   5
  -1  -1  19 37.7217 150.887   3
   1   1 -18 317.534 269.919   5
   1  -1 -18 368.308 241.551   5
   1   1 -17-338.875 241.260   5
   1  -1 -17-147.822 186.432   5
   1   1 -16 429.139 307.600   5
   1  -1 -16 813.623 372.095   5
   1  -1 -15 2674.77 654.000   5
   1   1 -15 2125.03 616.712   5
   1  -1 -14 4762.15 830.989   5
   1   1 -14 3673.72 794.269   5
   1   1 -13 701.845 344.361   5
   1  -1 -13 562.488 242.618   5
   1   1 -12 4035.95 776.056   5
   1  -1 -12 4237.71 715.512   5
  -1  -1  11 14499.7 1300.42   3
   1   1 -11 12224.7 1328.91   5
   1  -1 -11 12497.1 1198.35   5
   1  -1 -10 6046.12 785.211   5
  -1  -1  10 7407.60 886.250   3
   1   1 -10 5946.56 873.429   5
   1   1  -9 9011.84 1018.63   5
   1  -1  -9 9180.32 917.454   5
  -1  -1   9 9384.00 940.901   3
  -1  -1   9 8006.65 831.506   2
  -1  -1   8 3834.75 565.393   3
  -1  -1   8 2876.96 468.266   2
   1  -1  -8 3598.52 544.043   5
   1   1  -8 2393.80 520.696   5
   1   1  -7 31773.9 1736.61   5
  -1  -1   7 31403.6 1600.15   3
   1  -1  -7 31635.1 1501.50   5
  -1  -1   7 29061.7 1324.06   2
   1  -1  -6 102647. 2556.46   5
  -1  -1   6 101862. 2160.01   2
   1   1  -6 106260. 2984.84   5
  -1  -1   6 104672. 2789.38   3
  -1   1   6 104877. 2713.34   5
  -1  -1   5 24516.9 1280.05   3
   1  -1  -5 23614.2 1120.14   5
  -1  -1   5 23681.9 853.711   2
   1   1  -5 23262.1 1296.75   5
  -1   1   5 23255.6 1165.31   5
  -1  -1   4 68079.5 2076.02   3
   1   1  -4 70202.7 2056.17   5
  -1   1   4 67397.3 1783.30   5
   1   1  -3 8030.53 638.477   5
  -1  -1   3 7386.74 647.001   3
  -1   1   2 144760. 2535.57   1
   1   1  -2 142235. 2326.28   5
   1  -1  -1 8698.50 592.096   4
  -1   1   1 9456.37 658.633   1
   1   1  -1 9792.91 516.939   5
   1  -1   0 50411.4 1430.10   4
  -1  -1   0 49514.9 1546.08   4
  -1   1  -1 100896. 2098.17   5
  -1  -1  -1 97755.8 2199.82   4
   1   1   1 99488.9 1738.04   1
  -1   1  -2 1551.03 179.400   2
  -1  -1  -2 1328.35 195.521   1
  -1   1  -2 1097.07 240.794   5
   1   1   2 1245.81 185.684   1
   1  -1   3 207372. 3288.16   3
  -1   1  -3 206808. 2252.50   2
   1  -1   3 205952. 2414.24   2
  -1   1  -3 203524. 3494.35   5
   1   1   3 204985. 2277.68   5
  -1  -1  -3 212821. 2193.98   5
  -1   1  -4 29192.9 1415.80   5
   1   1   4 29635.1 1054.03   5
   1  -1   4 30357.1 1038.48   2
  -1   1  -4 29125.7 959.875   2
  -1  -1  -4 30268.0 1021.01   5
   1  -1   4 29105.4 1293.50   3
   1  -1   5 6057.04 530.546   2
   1   1   5 6042.72 558.637   5
   1  -1   5 6944.65 655.250   3
  -1   1  -5 5599.41 496.993   2
  -1   1  -5 5627.20 671.220   5
  -1  -1  -5 6542.54 555.265   5
  -1   1  -6 65523.5 1878.71   2
   1   1   6 67582.8 2132.30   5
  -1   1  -6 69537.5 2474.23   5
   1  -1   6 65896.6 1969.02   2
  -1  -1  -6 70630.9 2034.66   5
   1  -1   6 69670.7 2206.25   3
   1  -1   7 983.506 296.068   3
   1   1   7 559.962 209.166   5
   1  -1   7 854.117 239.368   2
  -1  -1  -7 840.042 250.095   5
  -1   1  -7 491.954 195.578   5
  -1  -1  -8 3537.29 536.017   5
  -1   1  -8 3806.65 644.523   5
   1  -1   8 4451.93 605.444   3
  -1  -1  -9 7204.40 810.139   5
  -1   1  -9 7709.14 967.989   5
  -1   1 -10 8052.23 1035.80   5
  -1  -1 -10 8402.21 932.537   5
  -1   1 -11 17739.9 1592.14   5
  -1  -1 -11 17616.0 1429.04   5
  -1   1 -12 5680.37 941.757   5
  -1  -1 -12 6329.06 894.455   5
  -1  -1 -13 6409.83 936.923   5
  -1   1 -13 5335.03 953.292   5
  -1  -1 -14 348.272 226.598   5
  -1   1 -14 369.423 235.829   5
  -1   1 -15 1934.89 617.380   5
  -1  -1 -15 2308.09 608.141   5
  -1   1 -16 1982.57 647.696   5
  -1  -1 -16 2030.15 595.637   5
  -1  -1 -17 2654.59 700.222   5
  -1   1 -17 3817.81 904.116   5
  -1  -1 -18 3952.47 919.744   5
  -1   1 -18 5502.94 1127.81   5
  -1  -1 -19 15.3137 181.319   5
  -1   1 -19 196.081 235.085   5
  -1   1 -20 292.210 321.175   5
  -1  -1 -20-91.8419 221.383   5
  -1   1 -21 3252.57 941.472   5
   1  -1  21 3055.54 1063.03   3
  -1  -1 -21 1084.85 480.513   5
  -1  -1 -22 1671.65 647.044   5
  -1   1 -22 795.914 384.135   5
   1  -1  22 1205.55 826.669   3
  -1   1 -23 786.329 540.954   5
   1  -1  23 2218.81 1054.18   3
  -1  -1 -23 994.287 502.261   5
  -1   1 -24 1382.79 678.856   5
  -1  -1 -24 1118.45 569.389   5
  -1   1 -25 168.864 289.820   5
  -1  -1 -25 270.607 281.583   5
   1  -1  25 659.405 819.673   3
   1  -1  26 548.888 788.284   3
  -1  -1 -26 144.059 76.1121   5
  -1   1 -26-181.180 346.032   5
  -1  -1 -27 230.963 287.230   5
  -1  -2  26 1099.65 770.041   3
   1   2 -25 414.853 420.896   5
  -1  -2  25 218.037 652.785   3
  -1  -2  24-672.363 789.742   3
   1   2 -24 746.797 495.099   5
   1  -2 -24 36.5928 293.999   5
   1   2 -23 767.563 490.470   5
  -1  -2  23-64.2207 273.119   3
   1  -2 -23 506.521 317.910   5
  -1  -2  22 2425.75 1000.46   3
   1  -2 -22 857.742 448.035   5
   1   2 -22 866.370 578.833   5
  -1  -2  21 801.493 557.929   3
   1   2 -21 507.096 317.627   5
   1  -2 -21 416.733 298.366   5
  -1  -2  20-136.417 156.313   3
   1  -2 -20 140.009 206.616   5
   1   2 -20 107.327 117.576   5
   1   2 -19 1974.42 687.819   5
  -1  -2  19 2572.01 831.545   3
   1  -2 -19 2280.66 653.146   5
  -1  -2  18-111.958 117.949   3
   1  -2 -18-68.7262 143.217   5
   1   2 -18 300.719 371.786   5
  -1  -2  17 231.796 372.203   3
   1   2 -17 426.885 341.743   5
   1  -2 -17 570.938 332.058   5
  -1  -2  16 3481.85 807.033   3
   1  -2 -16 4615.33 861.519   5
   1   2 -16 3782.14 960.386   5
  -1  -2  15 20484.2 1981.81   3
   1  -2 -15 16913.2 1615.55   5
   1   2 -15 19230.8 1957.23   5
   1   2 -14 4122.49 874.607   5
   1  -2 -14 2877.29 642.230   5
  -1  -2  14 2539.23 685.304   3
  -1  -2  13 289.176 287.657   3
   1  -2 -13 270.605 150.777   5
   1   2 -13 481.225 359.184   5
   1   2 -12 6734.81 1040.67   5
  -1  -2  12 7176.26 1038.83   3
   1  -2 -12 7413.97 944.922   5
   1  -2 -11 3732.70 645.831   5
  -1  -2  11 2629.51 571.962   3
   1   2 -11 3232.28 705.612   5
  -1  -2  11 2267.74 430.774   2
   1  -2 -10 183.678 160.338   5
  -1  -2  10 71.8827 32.9246   2
   1   2 -10 492.402 314.944   5
  -1  -2  10 51.9418 174.305   3
   1   2  -9 1693.60 438.818   5
  -1  -2   9 1705.17 287.435   2
  -1  -2   9 1825.12 474.688   3
  -1  -2   8 12076.0 1217.05   3
  -1  -2   8 10716.6 611.124   2
   1   2  -8 11860.6 1216.98   5
   1  -2  -7 6877.08 769.230   1
   1   2  -7 5709.52 806.264   5
  -1  -2   7 4970.42 324.597   2
  -1  -2   7 5970.26 853.978   3
  -1  -2   6 22873.1 1592.70   3
   1   2  -6 22983.6 1524.53   5
  -1   2   6 21920.6 1268.72   5
   1  -2  -6 23168.6 1376.63   1
   1  -2  -5 2927.83 489.029   1
  -1   2   5 2923.37 455.475   5
   1   2  -5 2075.71 438.750   5
   1   2  -4 2109.33 399.582   5
   1  -2  -4 2568.14 444.743   1
   1   2  -3 303.693 177.898   5
   1  -2  -3 421.047 168.540   1
  -1  -2   2 51762.0 2257.63   4
  -1  -2   2 48397.8 1829.92   5
   1  -2  -2 51482.0 2104.01   4
   1   2  -2 51826.7 1795.33   5
   1   2  -1 6100.28 569.315   5
   1  -2  -1 6931.81 764.116   4
  -1  -2   1 6326.11 777.710   4
  -1  -2   0 391.976 181.271   4
   1   2   0 238.640 102.227   5
   1  -2   0 516.310 225.282   4
   1   2   1 23599.9 932.697   5
  -1   2  -1 25524.9 1357.42   5
   1  -2   1 22516.2 1405.23   4
   1   2   1 21767.4 1256.79   1
  -1  -2  -1 23402.0 1470.42   4
  -1  -2  -2 2667.77 496.433   4
  -1   2  -2 2856.22 482.058   5
   1   2   2 2613.68 432.498   1
  -1   2  -3 9469.28 895.887   5
  -1   2  -3 8718.98 519.038   2
   1   2   3 8640.60 762.859   1
  -1   2  -4 30112.0 1706.74   5
  -1   2  -4 29970.9 907.683   2
  -1  -2  -4 29632.1 1374.75   1
   1   2   4 28138.2 1023.07   5
  -1   2  -5 80501.4 1533.05   2
  -1  -2  -5 85208.4 2362.25   1
   1   2   5 82438.7 1932.71   5
  -1   2  -5 88664.8 3019.23   5
   1  -2   6 1256.14 388.119   3
  -1   2  -6 1007.46 197.942   2
  -1   2  -6 1680.25 440.800   5
   1  -2   6 1212.39 217.386   2
  -1  -2  -6 1246.44 272.286   1
   1   2   6 1511.29 290.078   5
   1   2   7 26337.4 1324.34   5
  -1   2  -7 28271.7 1877.60   5
  -1  -2  -7 26932.7 1370.22   1
   1  -2   7 25596.8 1122.75   2
   1  -2   7 29324.1 1834.37   3
  -1   2  -7 23972.0 1065.46   2
  -1   2  -8 11257.4 1210.50   5
   1  -2   8 8543.49 717.685   2
  -1  -2  -8 9994.33 856.013   5
   1  -2   8 9683.96 1068.06   3
   1   2   8 8484.03 829.524   5
  -1   2  -9 19267.9 1663.91   5
  -1  -2  -9 19936.6 1276.71   5
   1  -2   9 19032.9 1537.63   3
   1  -2   9 17346.0 1126.86   2
  -1   2 -10 1020.10 381.014   5
  -1  -2 -10 1310.11 335.151   5
   1  -2  10 1564.91 427.730   3
  -1   2 -11 4071.12 820.405   5
  -1  -2 -11 3839.52 641.917   5
   1  -2  11 5267.20 887.438   3
   1  -2  12 60.0770 193.564   3
  -1   2 -12-149.320 259.927   5
  -1  -2 -12-38.0281 64.8931   5
   1  -2  13 5748.79 978.705   3
  -1  -2 -13 5650.54 847.673   5
  -1   2 -13 6790.09 1133.56   5
  -1   2 -14 19292.3 1955.65   5
  -1  -2 -14 18315.8 1596.27   5
   1  -2  14 21626.8 1973.48   3
  -1   2 -15 3296.09 837.066   5
   1  -2  15 3368.83 835.553   3
  -1  -2 -15 3071.97 703.619   5
  -1   2 -16 5091.42 1092.65   5
  -1  -2 -16 5382.47 916.714   5
   1  -2  16 5742.95 1151.75   3
  -1   2 -17 1505.16 601.938   5
   1  -2  17 2006.62 676.758   3
  -1  -2 -17 1619.06 506.472   5
   1  -2  18 423.644 450.275   3
  -1   2 -18-114.227 172.632   5
  -1  -2 -18-72.6782 110.457   5
   1  -2  19-156.574 352.734   3
  -1  -2 -19 224.746 219.441   5
  -1   2 -19-179.109 298.454   5
  -1  -2 -20 1228.66 493.260   5
   1  -2  20 1083.89 674.275   3
  -1   2 -20 1153.81 566.592   5
  -1  -2 -21 701.136 436.503   5
  -1   2 -21 477.122 409.140   5
   1  -2  21 1435.89 766.880   3
   1  -2  22 4750.90 1400.66   3
  -1   2 -22 3131.33 962.977   5
  -1  -2 -22 3254.48 856.317   5
  -1   2 -23 192.199 273.712   5
   1  -2  23 671.676 398.183   3
   1  -2  24 18.7254 221.895   3
  -1   2 -24 10.5312 75.4775   5
  -1   2 -25 15.4660 109.846   5
   1  -2  25 646.136 826.113   3
   1  -2  26 593.135 292.426   3
  -1  -3  25-1139.24 756.710   3
   1   3 -24 1577.29 733.220   5
  -1  -3  24 1835.50 887.628   3
  -1  -3  23-295.007 501.830   3
   1   3 -23 691.191 597.951   5
  -1  -3  22 218.685 296.335   3
   1   3 -22-198.992 258.096   5
  -1  -3  21-6.40805 323.108   3
   1   3 -21-34.0278 102.180   5
  -1  -3  20 378.096 368.864   3
   1   3 -20 346.039 208.634   5
   1   3 -19 73.0517 148.062   5
  -1  -3  19 519.170 345.568   3
  -1  -3  18 7394.06 1445.16   3
   1   3 -18 9514.66 1587.70   5
   1   3 -17 1295.77 635.979   5
  -1  -3  17 673.625 459.655   3
  -1  -3  16 13906.6 1804.67   3
   1   3 -16 15951.9 1957.14   5
   1  -3 -15 4192.61 752.222   1
  -1  -3  15 4218.95 977.554   3
   1   3 -15 3766.82 910.327   5
  -1  -3  14 279.735 126.199   3
   1  -3 -14 397.057 287.928   1
   1   3 -14 398.256 354.801   5
   1  -3 -13 34.6639 102.499   1
  -1  -3  13 171.958 120.692   3
   1   3 -13 496.090 367.802   5
   1  -3 -12 1661.65 447.840   1
   1   3 -12 1446.61 561.409   5
  -1  -3  12 1545.08 473.244   3
   1  -3 -11-49.3613 84.1695   1
   1   3 -11 269.668 228.976   5
  -1  -3  11-103.770 380.815   3
   1  -3 -10 476.588 220.981   1
   1   3 -10 464.892 234.974   5
   1   3  -9 839.089 359.833   5
   1  -3  -9 872.420 326.309   1
   1   3  -8-144.178 183.270   5
   1  -3  -8 208.881 197.730   1
   1   3  -7 255.729 157.035   5
   1  -3  -7 277.189 182.199   1
   1   3  -6 4531.87 741.279   5
   1  -3  -6 4407.47 734.572   1
   1   3  -5 21243.5 1568.74   5
  -1  -3   4 64704.9 3123.57   4
   1   3  -4 59263.1 2499.88   5
   1   3  -3 1413.07 232.067   2
   1   3  -3 1857.75 407.308   5
  -1  -3   3 1540.80 490.601   4
  -1  -3   2 14803.0 1438.98   4
   1  -3  -2 16147.4 1416.81   4
   1   3  -2 13816.8 1105.51   5
  -1  -3   1 44017.5 2479.95   4
   1  -3  -1 45415.0 2408.39   4
   1   3  -1 43137.4 1849.57   5
  -1   3   0 9431.21 950.918   5
   1  -3   0 7629.64 984.500   4
  -1  -3   0 8745.71 1066.18   4
   1   3   0 8700.35 783.606   5
  -1  -3  -1 1237.12 384.383   4
   1   3   1 1742.78 335.934   5
  -1   3  -1 1756.21 420.562   5
   1  -3   1 2061.99 502.840   4
   1   3   2 4535.42 510.776   5
  -1  -3  -2 3347.82 678.128   4
  -1   3  -2 3444.74 598.226   5
   1  -3   2 3527.32 677.382   4
   1  -3   3 4336.94 799.482   4
  -1   3  -3 4516.45 710.644   5
   1   3   4 62645.4 1881.54   5
  -1   3  -4 64605.1 2835.21   5
  -1   3  -4 62718.8 1541.19   2
  -1   3  -5 843.433 275.032   5
   1   3   5 547.279 164.701   5
  -1   3  -5 787.409 148.396   2
   1   3   6 469.591 169.525   5
  -1   3  -6 720.074 277.155   5
  -1   3  -6 715.410 134.349   2
  -1  -3  -7 3012.98 553.617   1
  -1   3  -7 3752.23 725.147   5
  -1   3  -7 2459.98 268.669   2
   1   3   7 2714.23 411.370   5
   1   3   8 1723.36 350.266   5
  -1  -3  -8 2155.33 472.318   1
  -1   3  -8 2750.98 670.930   5
  -1   3  -9 503.996 259.346   5
  -1  -3  -9-9.86988 114.111   1
  -1   3 -10 6175.47 1041.08   5
  -1  -3 -10 6473.59 823.594   1
  -1   3 -11 1924.31 601.746   5
  -1  -3 -11 1811.75 451.123   1
  -1  -3 -12 36.1211 97.0093   1
   1  -3  12-321.415 364.399   3
  -1   3 -12-75.1166 93.0975   5
  -1  -3 -13 723.890 296.177   1
  -1   3 -13 791.036 480.620   5
   1  -3  13 612.884 288.981   3
  -1  -3 -14 457.474 250.548   1
   1  -3  14 759.963 388.452   3
  -1   3 -14 439.812 395.172   5
  -1   3 -15 490.212 424.821   5
   1  -3  15 1251.58 565.655   3
  -1  -3 -15 286.345 253.487   1
   1  -3  16 5774.55 1186.45   3
  -1   3 -16 6243.45 1291.99   5
   1  -3  17 3122.43 881.042   3
  -1   3 -17 3548.94 1024.59   5
  -1   3 -18 625.072 412.003   5
   1  -3  18-298.716 300.079   3
   1  -3  19 836.133 606.956   3
  -1   3 -19 380.282 433.307   5
  -1   3 -20 1947.31 762.111   5
   1  -3  20 2162.78 847.540   3
   1  -3  21-607.303 560.851   3
  -1   3 -21-136.530 303.234   5
  -1   3 -22 299.374 336.678   5
   1  -3  22-279.339 536.032   3
  -1   3 -23 172.695 256.546   5
   1  -3  23-29.2748 486.445   3
   1  -3  24-480.005 473.677   3
   1  -3  25-310.372 465.228   3
  -1  -4  23-216.154 541.149   3
  -1  -4  22-95.5527 357.551   3
   1   4 -22 174.445 403.158   5
  -1  -4  21 88.5872 225.722   3
   1   4 -21-1135.85 624.061   5
   1   4 -20 21.3320 114.692   5
  -1  -4  20-431.982 494.787   3
   1   4 -19 493.172 387.022   5
   1   4 -18 778.923 454.072   5
   1   4 -17 829.189 512.960   5
   1   4 -16 1821.60 680.620   5
   1  -4 -16 2255.60 574.646   1
   1   4 -15 614.391 393.421   5
   1  -4 -15 298.530 181.472   1
   1  -4 -14 1296.94 447.885   1
   1   4 -14 2074.73 749.687   5
   1  -4 -13 643.826 317.927   1
   1   4 -13 724.348 400.941   5
   1   4 -12 1877.76 653.191   5
   1  -4 -12 1448.09 492.521   1
   1  -4 -11 1469.27 462.803   1
   1   4 -11 2683.04 744.525   5
   1   4 -10 1950.12 633.461   5
   1  -4 -10 1667.05 493.467   1
   1   4  -9 321.525 276.703   5
   1   4  -8 4891.65 914.214   5
   1   4  -7 4460.71 855.273   5
  -1  -4   6 204.577 279.107   4
   1   4  -6 13.4926 167.957   5
   1   4  -5 1444.93 474.783   5
  -1  -4   5 1293.57 526.757   4
  -1  -4   4 1706.99 600.266   4
   1   4  -4 1495.41 240.330   2
   1   4  -4 1208.69 371.461   5
  -1  -4   3 73.3397 221.023   4
   1   4  -3 44.7098 91.5309   5
  -1   4   3 32.2716 75.5243   5
   1  -4  -2-1.45044 108.966   4
  -1   4   2 145.584 145.069   5
   1   4  -2 67.9919 94.0009   5
  -1  -4   2 11.7622 221.528   4
  -1   4   1 455.477 264.540   5
   1   4  -1-100.302 139.002   5
  -1  -4   1 126.807 189.802   4
   1  -4  -1 169.483 234.357   4
  -1  -4   0 4232.25 871.643   4
   1   4   0 3758.24 597.274   5
  -1   4   0 4341.39 745.809   5
   1  -4   0 3432.03 768.657   4
  -1   4  -1 4.17728 114.920   5
  -1  -4  -1-217.662 279.028   4
  -1  -4  -2 331.618 110.412   4
  -1   4  -2 451.062 245.993   5
   1   4   2 711.845 228.620   5
   1  -4   2 199.509 157.376   4
  -1   4  -3 1274.02 425.092   5
   1   4   3 1936.49 379.713   5
   1  -4   3 1669.62 565.209   4
  -1   4  -4 285.128 126.295   2
   1  -4   4-23.1423 105.026   4
  -1   4  -4 131.899 126.478   5
   1   4   4 137.965 109.104   5
  -1   4  -5 182.150 73.9239   2
   1  -4   5 322.122 330.933   4
   1   4   5 250.739 127.285   5
  -1   4  -5 282.944 185.201   5
   1  -4   6 2060.25 670.186   4
  -1   4  -6 2208.12 599.046   5
  -1   4  -7-216.476 303.218   5
  -1   4  -8 1959.86 619.808   5
  -1   4  -9 423.770 269.523   5
  -1   4 -10 380.039 314.111   5
  -1   4 -11 610.762 387.525   5
  -1  -4 -11 1084.35 369.876   1
  -1  -4 -12 565.890 289.037   1
  -1   4 -12 439.260 287.453   5
  -1   4 -13 1458.32 602.998   5
  -1  -4 -13 765.940 277.326   1
  -1   4 -14 533.034 241.279   5
  -1   4 -15 805.606 410.239   5
  -1   4 -16 1677.75 672.231   5
  -1   4 -17 3271.69 969.065   5
  -1   4 -18 1820.12 775.793   5
  -1   4 -19 307.228 334.113   5
   1  -4  19 314.984 279.074   3
   1  -4  20 775.347 454.225   3
  -1   4 -20 418.878 373.882   5
   1  -4  21 277.221 334.131   3
  -1   4 -21 1849.11 828.324   5
   1  -4  22 441.291 381.693   3
   1  -4  23-110.768 427.345   3
   1   5 -20 330.591 404.015   5
   1   5 -19 660.989 507.403   5
   1   5 -18 2264.70 897.786   5
   1   5 -17 1576.86 711.582   5
   1   5 -16 926.840 524.565   5
   1   5 -15-117.124 211.157   5
   1   5 -14 131.224 179.790   5
   1   5 -13 66.8436 173.342   5
   1   5 -12 2696.91 865.406   5
   1   5 -11 357.743 282.589   5
   1   5 -10 339.350 379.771   5
  -1  -5  10 81.9121 191.456   4
   1   5  -9 360.873 370.751   5
  -1  -5   9 10.3131 251.360   4
  -1  -5   8-10.5743 251.835   4
   1   5  -8 340.939 265.749   5
   1   5  -7 48.0510 110.854   5
  -1  -5   7-268.616 408.258   4
   1   5  -6 2821.17 721.492   5
  -1  -5   6 2067.67 828.293   4
  -1  -5   5 4319.76 1067.65   4
   1   5  -5 2996.15 736.760   5
   1   5  -4 1675.16 510.340   5
  -1  -5   4 2088.91 746.116   4
   1   5  -3 6241.09 984.168   5
  -1  -5   3 5435.51 1185.41   4
  -1  -5   2 1003.28 511.122   4
   1   5  -2 427.556 232.705   5
  -1   5   1 613.950 281.336   5
  -1  -5   1 1148.10 444.476   4
   1   5  -1 1398.29 447.316   5
   1  -5  -1 417.855 304.233   4
   1  -5   0 3715.21 919.031   4
  -1   5   0 2701.29 638.278   5
  -1  -5   0 2112.20 636.912   4
  -1  -5  -1 1219.69 560.983   4
  -1   5  -1 1528.90 521.713   5
   1  -5   1 1977.90 689.478   4
  -1   5  -2 6851.88 1100.42   5
  -1  -5  -2 7623.43 1362.92   4
   1  -5   2 6209.58 1254.34   4
  -1   5  -3 2652.69 702.403   5
   1  -5   3 1891.94 663.311   4
  -1   5  -4 10489.8 1415.65   5
   1  -5   4 11615.0 1703.28   4
  -1   5  -5 452.764 362.211   5
   1  -5   5-152.295 362.370   4
  -1   5  -6 262.182 208.407   5
   1  -5   6 914.211 484.364   4
  -1   5  -7 19.0495 79.5649   5
   1  -5   7 46.5899 229.647   4
   1  -5   8 2103.22 737.870   4
  -1   5  -8 2761.51 787.014   5
   1  -5   9 217.645 209.940   4
  -1   5  -9 72.0100 90.1291   5
   1  -5  10 2466.06 911.018   4
  -1   5 -10 2006.69 757.734   5
  -1   5 -11 434.640 268.978   5
  -1   5 -12 487.623 256.233   5
  -1   5 -13 227.565 286.938   5
  -1   5 -14 171.601 277.865   5
  -1   5 -15-199.219 311.704   5
  -1   5 -16-115.036 207.015   5
  -1   5 -17 548.008 567.012   5
  -1   5 -18 1569.98 731.643   5
  -1   5 -19-82.5499 299.724   5
   1   6 -17 143.205 248.860   5
  -1  -6  16 309.576 432.116   4
   1   6 -16 332.818 351.094   5
   1   6 -15-123.625 344.615   5
  -1  -6  15 692.204 431.340   4
   1   6 -14 45.8452 149.391   5
  -1  -6  14 101.313 218.779   4
  -1  -6  13 587.588 485.572   4
   1   6 -13 119.765 105.566   5
  -1  -6  12 140.746 243.112   4
   1   6 -12 160.902 247.033   5
  -1  -6  11-7.69114 170.022   4
   1   6 -11-235.447 306.680   5
  -1  -6  10 575.889 425.117   4
  -1  -6   9 185.142 319.530   4
  -1  -6   8 72.4682 202.501   4
  -1  -6   7-141.205 281.860   4
  -1  -6   6 1147.74 631.599   4
  -1  -6   5 74.4881 309.267   4
  -1  -6   4 4036.58 1119.41   4
  -1  -6   3 1804.35 738.146   4
  -1  -6   2 8069.16 1590.34   4
  -1  -6   1 2999.41 964.993   4
  -1  -6   0 5690.51 1310.17   4
   1  -6   0 4630.98 1198.88   4
   1  -6   1 392.340 409.732   4
   1  -6   2 2446.25 837.086   4
   1  -6   3 4015.61 1087.39   4
   1  -6   4 2884.22 951.199   4
   1  -6   5 1171.08 633.821   4
   1  -6   6 191.987 420.680   4
   1  -6   7-287.770 312.388   4
   1  -6   8-679.042 481.845   4
  -1   6  -8-173.881 290.949   5
   1  -6   9-128.972 269.801   4
  -1   6  -9 786.047 490.683   5
   1  -6  10 229.448 260.442   4
  -1   6 -10 15.9636 87.6709   5
  -1   6 -11 115.163 92.0066   5
   1  -6  11 787.498 539.112   4
  -1   6 -12 406.698 392.206   5
   1  -6  12 393.947 399.551   4
  -1   6 -13 143.500 231.455   5
   1  -6  13 527.261 394.902   4
  -1   6 -14 891.957 623.841   5
   1  -6  14-569.032 466.682   4
  -1   6 -15 295.927 342.831   5
   1  -6  15 118.883 149.440   4
  -1   6 -16-129.120 140.421   5
   1  -6  16 281.332 267.856   4
  -1  -7   9 640.311 514.305   4
  -1  -7   8 86.7967 277.722   4
  -1  -7   7 86.9631 190.965   4
  -1  -7   6-23.6390 112.673   4
  -1  -7   5 262.732 315.457   4
  -1  -7   4 700.963 593.635   4
  -1  -7   3 59.7435 283.394   4
  -1  -7   2-234.827 338.921   4
  -1  -7   1-64.9573 116.911   4
   1  -7   2-290.498 237.976   4
   1  -7   3-66.0761 198.901   4
   1  -7   4-100.608 300.288   4
   1  -7   5 449.718 312.503   4
   1  -7   6-10.5033 121.085   4
   1  -7   7 531.384 483.854   4
   1  -7   8 371.231 385.222   4
   1  -7   9-12.9119 100.668   4
   2   0 -28-385.920 368.359   5
   2   0 -27 122.363 245.174   5
   2   0 -26 41.6667 99.4689   5
   2   0 -25-169.517 248.920   5
   2   0 -24 391.716 280.706   5
   2   0 -23 15.9705 185.509   5
   2   0 -22 651.339 390.014   5
   2   0 -21 435.382 452.401   5
   2   0 -20 2896.53 814.438   5
   2   0 -19 99.4037 195.753   5
   2   0 -18 4212.58 963.027   5
   2   0 -17-202.035 309.899   5
   2   0 -16 3860.94 836.258   5
   2   0 -15-139.921 194.883   5
   2   0 -14 171.158 234.517   5
   2   0 -13 136.440 107.638   5
   2   0 -12 83637.7 3376.15   5
   2   0 -11-57.7212 61.9779   5
   2   0 -10 42463.4 2190.76   5
   2   0  -9-11.2767 120.705   5
   2   0  -8 6001.61 733.207   5
   2   0  -7 6.05454 66.1713   5
   2   0  -6 183931. 3582.36   5
   2   0  -5 59.9872 76.7155   5
   2   0  -4 2373.03 335.051   5
  -2   0  -2 420165. 3900.57   2
  -2   0  -3 1.87996 21.4617   5
  -2   0  -3 36.6039 54.8236   2
  -2   0  -4 80432.7 2159.22   2
  -2   0  -4 80161.9 2076.53   5
  -2   0  -5-71.1562 115.819   2
  -2   0  -5 50.3607 42.1586   5
  -2   0  -6 11472.9 921.086   5
  -2   0  -7 20.9902 105.388   5
  -2   0  -8 17465.2 1304.11   5
  -2   0  -9-14.6913 113.328   5
  -2   0 -10 10919.1 1142.07   5
  -2   0 -11 52.8447 170.121   5
  -2   0 -12 45596.7 2519.49   5
  -2   0 -13 55.8776 118.672   5
  -2   0 -14 8774.21 1209.45   5
  -2   0 -15 313.259 227.622   5
  -2   0 -16 1507.06 550.820   5
  -2   0 -17 45.9073 163.473   5
  -2   0 -18 574.655 340.311   5
  -2   0 -19-22.3164 74.1305   5
  -2   0 -20 5536.62 1140.29   5
  -2   0 -21 270.777 286.942   5
  -2   0 -22 149.044 316.703   5
  -2   0 -23 515.327 480.195   5
  -2   0 -24 1096.55 590.070   5
  -2   0 -25 175.108 368.570   5
  -2   0 -26 880.749 572.765   5
  -2   0 -27 143.930 255.144   5
   2  -1 -28-141.201 305.264   5
   2  -1 -27 310.784 297.276   5
   2   1 -27 15.3979 112.723   5
  -2  -1  26-520.107 811.305   3
   2   1 -26 299.940 433.054   5
   2  -1 -26 169.775 284.448   5
  -2  -1  25 1495.86 980.105   3
   2   1 -25 320.745 329.953   5
   2  -1 -25 405.976 390.666   5
   2  -1 -24 387.256 315.126   5
  -2  -1  24-317.346 357.536   3
   2   1 -24 147.771 177.150   5
   2  -1 -23-64.4770 92.8287   5
   2   1 -23 662.265 433.426   5
  -2  -1  23 440.145 482.110   3
   2   1 -22 1.14731 119.896   5
   2  -1 -22 440.423 325.349   5
  -2  -1  22 659.950 544.590   3
  -2  -1  21 550.861 434.799   3
   2  -1 -21 129.110 235.032   5
   2   1 -21 43.4963 187.976   5
  -2  -1  20 51.9591 162.671   3
   2   1 -20 350.871 231.818   5
   2  -1 -20 238.596 166.311   5
   2  -1 -19 1061.80 450.256   5
   2   1 -19 2282.90 679.763   5
  -2  -1  19 2252.12 816.743   3
   2  -1 -18 5753.53 1076.92   5
  -2  -1  18 6183.06 1201.08   3
   2   1 -18 5315.69 1066.06   5
   2  -1 -17 736.657 371.269   5
  -2  -1  17 915.577 525.798   3
   2   1 -17 834.296 439.457   5
  -2  -1  16 11099.6 1483.86   3
   2  -1 -16 10154.8 1333.18   5
   2   1 -16 9379.26 1356.42   5
   2   1 -15 1906.78 593.217   5
   2  -1 -15 1623.92 504.487   5
  -2  -1  15 2478.18 727.156   3
   2   1 -14 6865.89 1080.42   5
   2  -1 -14 4961.53 888.785   5
  -2  -1  14 6978.97 1052.24   3
   2  -1 -13 7895.41 1031.45   5
   2   1 -13 8162.62 1156.84   5
  -2  -1  13 8318.29 1077.55   3
   2   1 -12 74335.4 3338.58   5
   2  -1 -12 72862.6 3016.90   5
  -2  -1  12 75779.7 3116.79   3
   2  -1 -11 124184. 3764.32   5
  -2  -1  11 121888. 3724.31   3
   2   1 -11 123736. 4085.09   5
   2  -1 -10 55.8771 96.6306   5
   2   1 -10 82.7002 56.0190   5
   2  -1  -9 33340.5 1772.28   5
  -2  -1   9 35602.9 1852.88   3
   2   1  -9 34851.3 1983.20   5
   2  -1  -8 3872.20 564.837   5
  -2  -1   8 3591.96 612.120   3
   2   1  -8 4504.67 684.147   5
   2   1  -7 94998.0 2978.87   5
  -2  -1   7 91392.6 2767.49   3
   2  -1  -7 95768.1 2648.27   5
   2  -1  -6 193823. 3657.62   5
  -2  -1   6 201861. 3913.74   3
   2   1  -6 195898. 4006.02   5
  -2   1   6 186308. 3828.89   5
  -2  -1   5 325221. 4803.77   3
   2   1  -5 320134. 4738.30   5
  -2   1   5 312714. 4511.87   5
  -2  -1   4 804999. 7323.19   3
  -2   1   4 826865. 7020.22   5
   2   1  -4 818275. 6898.11   5
   2   1  -3 12553.4 775.366   5
  -2  -1   3 10242.3 776.028   3
   2   1  -2 103972. 1986.07   5
  -2   1   2 104454. 2340.09   1
   2   1  -1 12373.6 554.797   5
  -2  -1   1 12086.3 807.562   4
   2  -1  -1 11289.0 640.178   4
   2   1  -1 11304.4 521.380   2
  -2  -1   1 13104.2 567.433   2
  -2   1   1 11479.2 782.671   1
  -2  -1   0 16754.4 779.972   2
  -2  -1   0 15518.8 898.032   4
   2   1   0 14724.7 710.446   2
   2  -1   0 16361.7 771.753   4
  -2   1  -1 10975.9 607.918   2
   2   1   1 11129.1 503.789   1
  -2   1  -1 9631.79 577.563   3
  -2  -1  -1 11459.7 786.461   4
  -2   1  -2-145.925 122.195   5
  -2  -1  -2 55.3863 28.9787   1
  -2   1  -2 124.993 69.3931   2
  -2   1  -2-45.5762 63.0875   3
   2  -1   2-114.557 135.238   3
  -2  -1  -3 7322.39 409.688   5
   2  -1   3 6639.46 538.331   2
   2   1   3 7358.20 414.993   5
  -2   1  -3 7289.53 695.495   5
  -2   1  -3 7473.90 518.135   2
   2  -1   3 6388.85 549.020   3
  -2   1  -3 6575.09 559.563   3
   2  -1   4 26873.2 1146.74   2
  -2   1  -4 28297.3 1461.51   5
  -2  -1  -4 27375.6 975.848   5
   2  -1   4 27112.3 1219.94   3
  -2   1  -4 27031.1 1062.53   2
   2   1   4 26544.8 1009.58   5
   2  -1   5 3270.52 453.703   3
  -2   1  -5 4119.43 452.181   2
  -2  -1  -5 4193.00 444.444   5
   2   1   5 3428.44 422.104   5
  -2   1  -5 3930.92 573.603   5
   2  -1   5 3365.96 452.775   2
  -2  -1  -6 59442.1 1884.15   5
  -2   1  -6 58497.0 1885.16   2
  -2   1  -6 58975.0 2384.41   5
   2  -1   6 59385.3 2032.37   2
   2   1   6 56631.0 1944.90   5
   2  -1   6 56043.6 1941.30   3
   2   1   7 756.763 253.975   5
  -2   1  -7 644.735 201.255   2
  -2   1  -7 423.102 240.057   5
  -2  -1  -7 653.926 203.919   5
   2  -1   7 899.447 314.804   3
  -2  -1  -8 55067.1 2125.93   5
  -2   1  -8 51050.6 2402.35   5
  -2  -1  -9 6366.39 775.477   5
  -2   1  -9 6250.85 858.890   5
  -2   1 -10 2263.06 563.784   5
  -2  -1 -10 2115.91 461.154   5
  -2   1 -11 2647.83 594.793   5
  -2  -1 -11 3068.84 606.369   5
  -2  -1 -12 508.684 276.773   5
  -2   1 -12 737.521 335.554   5
  -2  -1 -13 661.150 269.926   5
  -2   1 -13 1013.99 463.019   5
  -2   1 -14-189.502 266.917   5
  -2  -1 -14-63.5595 173.305   5
  -2   1 -15 1013.24 426.152   5
  -2  -1 -15 1010.16 389.945   5
  -2  -1 -16 3070.41 738.532   5
  -2   1 -16 2796.64 828.523   5
  -2  -1 -17 16000.5 1716.63   5
  -2   1 -17 17105.0 1948.83   5
  -2   1 -18 398.213 307.426   5
  -2  -1 -18 589.722 352.255   5
  -2   1 -19 279.124 289.767   5
  -2  -1 -19-296.876 289.311   5
  -2   1 -20 96.1077 87.1996   5
  -2  -1 -20 28.1224 154.011   5
  -2   1 -21 1146.47 602.087   5
  -2  -1 -21 696.612 410.093   5
  -2   1 -22 1978.89 722.328   5
   2  -1  22 3488.69 1385.83   3
  -2  -1 -22 1328.55 589.515   5
  -2   1 -23 455.344 376.924   5
  -2  -1 -23 325.562 319.183   5
   2  -1  23 1270.82 794.554   3
  -2   1 -24 745.705 469.790   5
  -2  -1 -24 1658.02 676.574   5
  -2  -1 -25 471.990 323.308   5
  -2   1 -25 1692.00 766.174   5
   2  -1  25 1075.91 864.015   3
  -2   1 -26 90.3745 227.236   5
   2  -1  26 553.308 823.862   3
  -2  -1 -26 183.984 240.041   5
   2   2 -26 346.574 406.533   5
  -2  -2  26 303.684 565.743   3
   2   2 -25 844.362 591.986   5
   2  -2 -25 150.592 206.383   5
  -2  -2  25 340.729 712.941   3
   2   2 -24 410.572 344.013   5
   2  -2 -24-502.535 355.312   5
  -2  -2  24 853.108 713.085   3
   2  -2 -23 670.821 416.219   5
   2   2 -23 50.6505 234.506   5
   2   2 -22 1365.89 622.196   5
   2  -2 -22 1843.50 649.048   5
  -2  -2  22 1777.36 889.802   3
   2  -2 -21-83.6103 213.178   5
   2   2 -21-1.73506 92.4804   5
  -2  -2  21-201.353 389.817   3
   2   2 -20 719.603 418.145   5
  -2  -2  20 1168.91 724.783   3
   2  -2 -20 1419.42 515.868   5
   2   2 -19 5615.58 1203.08   5
  -2  -2  19 7867.92 1448.81   3
   2  -2 -19 4372.36 922.782   5
   2  -2 -18 659.162 293.036   5
  -2  -2  18 1404.68 611.583   3
   2   2 -18 1847.44 627.475   5
   2   2 -17 15920.4 1867.08   5
   2  -2 -17 13907.0 1571.78   5
  -2  -2  17 17346.1 1982.12   3
   2  -2 -16 13134.0 1474.84   5
   2   2 -16 13182.2 1701.02   5
  -2  -2  16 13170.2 1638.89   3
   2  -2 -15 192.196 139.003   5
  -2  -2  15 415.122 322.148   3
   2   2 -15 109.625 140.523   5
   2  -2 -14 234.056 172.386   5
   2   2 -14 769.197 422.932   5
  -2  -2  14 636.459 269.316   3
   2  -2 -13 4959.70 817.563   5
   2   2 -13 5456.54 971.347   5
  -2  -2  13 4648.27 844.656   3
  -2  -2  12-46.3127 122.332   2
  -2  -2  12-36.2045 221.607   3
   2   2 -12-21.8279 231.688   5
   2  -2 -12 86.3291 116.202   5
  -2  -2  11 1084.40 281.329   2
   2  -2 -11 1196.48 378.043   5
   2   2 -11 1758.14 512.044   5
  -2  -2  11 946.372 388.175   3
  -2  -2  10 3526.94 450.848   2
   2   2 -10 4192.21 790.044   5
  -2  -2  10 3856.69 707.104   3
  -2  -2   9 12790.6 1291.54   3
  -2  -2   9 12310.4 704.112   2
   2   2  -9 14183.3 1366.42   5
   2  -2  -8 31583.1 1756.34   1
  -2  -2   8 31319.5 1987.36   3
  -2  -2   8 28824.6 866.094   2
   2   2  -8 28823.2 1857.77   5
  -2  -2   7 3012.07 595.024   3
   2   2  -7 2941.75 572.148   5
   2  -2  -7 3235.31 554.110   1
   2  -2  -6 3562.32 557.204   1
   2   2  -6 2995.38 534.327   5
   2   2  -5 40772.7 1901.87   5
   2  -2  -5 41278.9 1880.58   1
   2   2  -4 18137.4 1182.50   5
   2  -2  -4 18403.2 1237.91   1
   2  -2  -3 11399.7 1004.70   1
   2   2  -3 11524.0 871.178   5
  -2  -2   3 10391.2 884.559   5
  -2  -2   2 10819.4 1039.89   4
   2   2  -2 11101.3 782.293   5
  -2  -2   2 9700.11 775.100   5
   2  -2  -2 11364.1 956.679   4
   2   2  -2 9982.81 547.496   2
  -2  -2   1 8159.82 896.562   4
   2  -2  -1 9225.96 847.791   4
   2   2  -1 8538.24 607.367   2
   2   2  -1 10145.3 664.656   5
   2  -2   0 130025. 3222.34   4
   2   2   0 130629. 2096.03   5
  -2  -2   0 130357. 3535.85   4
   2   2   1 929.001 149.496   5
   2   2   1 566.300 192.859   2
   2  -2   1 407.145 181.224   4
  -2  -2  -1 598.139 235.814   4
  -2  -2  -2 63488.3 2498.13   4
  -2   2  -2 62865.1 1724.53   2
   2   2   2 60533.6 1944.82   1
  -2   2  -2 65739.1 2406.70   5
  -2   2  -3 324.829 116.632   2
   2   2   3 393.160 151.597   1
  -2   2  -3 227.839 83.2150   5
  -2   2  -4 905.210 248.930   5
   2   2   4 851.814 147.333   5
  -2   2  -4 1239.89 227.290   2
  -2  -2  -4 972.856 215.979   1
   2   2   5 40766.8 1221.42   5
  -2   2  -5 40280.1 2123.83   5
  -2   2  -5 39390.6 1311.05   2
  -2  -2  -5 40495.0 1518.82   1
   2  -2   5 33799.9 1362.93   2
   2  -2   6 6195.46 592.151   2
  -2   2  -6 6397.39 922.671   5
  -2   2  -6 6037.71 546.453   2
   2   2   6 6755.51 569.380   5
  -2  -2  -6 6802.31 632.549   1
   2  -2   6 7097.02 937.996   3
   2   2   7 1656.39 311.660   5
   2  -2   7 1785.08 344.864   2
  -2   2  -7 1569.13 457.347   5
  -2  -2  -7 1534.05 315.293   1
  -2  -2  -7 1502.17 297.160   5
   2  -2   7 1766.60 422.046   3
  -2   2  -7 1284.57 264.740   2
   2   2   8 10815.8 917.053   5
  -2   2  -8 13787.6 1392.18   5
   2  -2   8 12626.5 965.661   2
  -2   2  -8 12893.7 911.725   2
   2  -2   8 14387.4 1294.28   3
  -2  -2  -8 13053.8 952.832   5
  -2  -2  -9 38.1814 78.1983   5
  -2   2  -9 58.5364 130.753   5
   2  -2   9-74.0937 155.954   3
   2  -2  10 624.017 297.111   3
  -2   2 -10 582.229 291.680   5
  -2  -2 -10 492.510 209.912   5
   2  -2  11 11293.4 1269.88   3
  -2   2 -11 10841.5 1366.56   5
  -2  -2 -11 11139.1 1081.92   5
  -2   2 -12 1220.79 472.244   5
  -2  -2 -12 904.420 314.006   5
   2  -2  12 1558.45 490.692   3
  -2   2 -13 776.148 469.446   5
  -2  -2 -13 146.036 160.652   5
   2  -2  13 387.494 360.526   3
  -2   2 -14 58595.7 3471.37   5
  -2  -2 -14 57181.0 2803.83   5
   2  -2  15 210.564 214.077   3
  -2  -2 -15 51.7639 123.455   5
   2  -2  16 49.3040 169.194   3
  -2  -2 -16-42.1268 114.680   5
  -2   2 -17 3465.98 894.902   5
  -2  -2 -17 2799.78 679.326   5
   2  -2  17 5302.15 1147.23   3
  -2  -2 -18-201.176 193.745   5
  -2   2 -18 60.0947 80.8728   5
   2  -2  19 645.488 285.809   3
  -2   2 -19 1108.60 606.374   5
  -2  -2 -19 966.680 396.314   5
  -2   2 -20 423.718 450.909   5
  -2  -2 -20 775.365 391.066   5
   2  -2  20 685.199 623.462   3
  -2  -2 -21-678.156 378.973   5
   2  -2  21 661.912 739.756   3
  -2   2 -21 372.785 393.271   5
   2  -2  22 1078.09 805.631   3
  -2   2 -22 567.398 451.310   5
   2  -2  23 807.267 774.880   3
  -2   2 -23 859.953 527.925   5
  -2   2 -24 3.57420 275.414   5
   2  -2  24 658.735 574.505   3
   2  -2  25 1732.26 1067.29   3
   2  -2  26 525.007 759.020   3
  -2  -3  25-296.385 331.047   3
  -2  -3  24-240.924 311.617   3
   2   3 -24 413.259 278.677   5
   2   3 -23 528.109 440.770   5
  -2  -3  23-150.251 154.556   3
  -2  -3  22-469.543 507.778   3
   2   3 -22 231.082 285.631   5
   2   3 -21 363.025 350.104   5
  -2  -3  21 258.259 235.366   3
   2   3 -20-93.2956 246.918   5
  -2  -3  20 120.828 323.578   3
   2   3 -19 48.1341 174.889   5
  -2  -3  19 348.929 469.041   3
   2   3 -18 378.590 268.795   5
  -2  -3  18 1304.44 565.165   3
  -2  -3  17 7055.19 1316.58   3
   2   3 -17 5812.91 1178.55   5
   2   3 -16 1106.14 575.294   5
  -2  -3  16 239.726 442.686   3
   2   3 -15 28.9184 271.083   5
  -2  -3  15 116.251 255.423   3
   2  -3 -15 100.883 145.268   1
   2  -3 -14 364.730 237.336   1
   2   3 -14 209.035 185.756   5
  -2  -3  14 414.159 424.118   3
   2   3 -13 9126.87 1364.75   5
  -2  -3  13 9024.19 1312.14   3
   2  -3 -13 10000.3 1179.47   1
   2  -3 -12 979.520 388.676   1
   2   3 -12 702.930 382.711   5
  -2  -3  12 12.8731 245.257   3
   2   3 -11 5884.28 1008.45   5
   2  -3 -11 6450.58 914.278   1
   2  -3 -10 13.0927 115.417   1
   2   3 -10 99.2110 149.772   5
   2  -3  -9 2623.48 588.048   1
   2   3  -9 3170.57 684.146   5
   2   3  -8 208.658 216.496   5
   2  -3  -8 241.099 151.372   1
   2   3  -7 7645.15 987.425   5
   2  -3  -7 6516.47 898.485   1
   2   3  -6 9114.22 1023.42   5
   2  -3  -6 9626.29 1083.55   1
   2   3  -5 97133.0 3256.75   5
   2   3  -4 6095.92 777.062   5
  -2  -3   4 6388.67 1019.65   4
  -2  -3   3 702.314 323.870   4
   2   3  -3 1007.93 299.545   5
   2   3  -3 589.789 145.234   2
   2   3  -2 7958.86 784.141   5
  -2  -3   2 6551.67 965.700   4
   2  -3  -2 7973.54 986.910   4
   2   3  -2 5502.69 531.156   2
   2  -3  -1-75.3740 126.900   4
  -2  -3   1 27.9331 113.369   4
   2   3  -1-21.5285 32.1647   5
   2   3  -1-45.3776 53.9651   2
  -2  -3   0 6385.84 931.590   4
   2  -3   0 7379.88 950.151   4
   2   3   0 6411.25 614.270   5
  -2   3   0 7157.19 872.128   5
  -2   3  -1 4443.47 703.932   5
  -2  -3  -1 4130.63 754.604   4
   2  -3   1 4816.16 772.878   4
   2   3   1 4249.70 451.566   5
   2   3   2 16146.0 810.236   5
   2  -3   2 18260.7 1558.33   4
  -2  -3  -2 14172.6 1413.49   4
  -2   3  -2 18311.2 1461.22   5
  -2   3  -3 17216.0 1010.39   2
   2   3   3 19644.3 824.468   5
  -2   3  -3 19546.1 1560.87   5
   2  -3   3 19860.1 1678.09   4
  -2   3  -4 14981.3 849.826   2
   2   3   4 13706.7 668.160   5
  -2   3  -4 15657.4 1439.91   5
   2   3   5 4323.22 386.412   5
  -2   3  -5 5552.97 484.679   2
  -2   3  -5 5171.75 841.560   5
  -2   3  -6 620.547 322.802   5
  -2   3  -6 577.785 158.606   2
   2   3   6 329.406 113.445   5
   2   3   7 7660.39 610.216   5
  -2  -3  -7 9159.04 944.826   1
  -2   3  -7 10855.9 1307.30   5
  -2   3  -7 8130.30 590.096   2
   2   3   8 6913.34 639.265   5
  -2   3  -8 8816.00 1213.20   5
  -2   3  -8 7826.41 632.869   2
  -2  -3  -8 8477.64 896.731   1
  -2   3  -9 4765.39 920.593   5
  -2  -3  -9 3852.34 607.514   1
  -2   3 -10-85.9972 229.980   5
   2  -3  10-300.096 428.520   3
  -2  -3 -10 104.871 126.153   1
  -2   3 -11 5622.10 1029.45   5
  -2  -3 -11 4401.38 655.914   1
   2  -3  11 4291.85 844.334   3
  -2   3 -12 9.05726 138.397   5
  -2  -3 -12-42.7726 45.3465   1
   2  -3  12-224.731 344.650   3
   2  -3  13 82.2909 255.852   3
  -2  -3 -13 427.113 205.727   1
  -2   3 -13 744.798 404.179   5
   2  -3  14-48.5106 304.468   3
  -2  -3 -14 195.209 170.923   1
  -2  -3 -15 732.793 269.458   1
   2  -3  15 748.412 349.357   3
  -2   3 -15 514.672 403.749   5
  -2  -3 -16 3677.83 643.848   1
  -2   3 -16 4189.72 1041.85   5
   2  -3  16 4597.53 1085.01   3
   2  -3  17 17181.5 2160.57   3
  -2   3 -17 17318.4 2153.84   5
   2  -3  18 2197.90 824.820   3
  -2   3 -18 3468.38 1024.43   5
   2  -3  19-350.794 286.572   3
  -2   3 -19-237.379 258.346   5
   2  -3  20 744.993 513.442   3
  -2   3 -20 886.062 615.274   5
   2  -3  21 6.44874 388.987   3
  -2   3 -21-322.743 250.929   5
  -2   3 -22 113.936 313.381   5
   2  -3  22-277.959 483.112   3
   2  -3  23-713.762 730.453   3
  -2   3 -23-242.934 127.292   5
   2  -3  24 171.850 458.385   3
   2  -3  25-889.771 643.589   3
  -2  -4  23-249.408 398.983   3
   2   4 -22-39.9060 269.140   5
  -2  -4  22-52.8688 308.927   3
   2   4 -21 757.633 486.562   5
  -2  -4  21 628.926 425.347   3
   2   4 -20 345.999 270.962   5
  -2  -4  20 371.372 291.627   3
   2   4 -19 680.607 320.284   5
   2   4 -18-143.242 222.931   5
   2   4 -17 3185.71 932.800   5
   2  -4 -17 1892.41 576.559   1
   2   4 -16-293.061 318.219   5
   2  -4 -16 37.9541 162.889   1
   2   4 -15 923.364 487.150   5
   2  -4 -15 617.416 324.886   1
   2   4 -14 63.8595 261.721   5
   2  -4 -14 492.900 328.826   1
   2   4 -13 0.94631 298.438   5
   2  -4 -13-41.0189 206.135   1
   2   4 -12 704.847 405.211   5
   2  -4 -12 390.282 191.482   1
   2  -4 -11 1821.93 528.507   1
   2   4 -11 3210.37 815.997   5
   2  -4 -10 2421.79 624.182   1
   2   4 -10 2851.66 710.009   5
   2   4  -9 431.239 318.238   5
   2   4  -8 4181.77 831.576   5
   2   4  -7 14323.9 1492.97   5
  -2  -4   6 2316.85 702.374   4
   2   4  -6 2220.75 582.525   5
  -2  -4   5 1180.76 506.887   4
   2   4  -5 707.154 279.231   5
  -2  -4   4 2901.82 748.871   4
   2   4  -4 1584.70 448.701   5
  -2  -4   3 584.748 332.799   4
   2   4  -3 1384.04 402.226   5
   2   4  -2 94.0642 86.8950   5
  -2  -4   2 93.4129 277.664   4
  -2   4   2 600.355 260.632   5
   2  -4  -2 323.863 239.473   4
   2   4  -1-28.5002 104.182   5
   2  -4  -1 60.6997 125.601   4
  -2  -4   1 404.723 259.953   4
  -2   4   1 186.987 174.992   5
   2  -4   0 42.1548 167.442   4
   2   4   0 24.0089 49.9744   5
  -2  -4   0-116.784 216.028   4
  -2   4   0 17.7476 39.0793   5
  -2  -4  -1 95.3107 192.099   4
   2   4   1-6.67790 65.5306   5
  -2   4  -1 155.472 182.967   5
   2  -4   1-59.1336 208.421   4
  -2  -4  -2 89.2429 138.481   4
  -2   4  -2-34.4424 199.263   5
   2   4   2 241.668 124.000   5
   2  -4   2 48.8769 189.889   4
  -2   4  -3 2794.81 661.942   5
   2  -4   3 3011.97 749.071   4
  -2   4  -3 3397.11 507.079   2
   2   4   3 2942.40 394.220   5
  -2   4  -4 224.191 127.286   2
   2   4   4 432.827 135.299   5
   2  -4   4 424.569 150.284   4
  -2   4  -4 234.724 207.063   5
  -2   4  -5 4060.06 841.768   5
   2  -4   5 3039.17 782.475   4
  -2   4  -5 2996.07 371.753   2
  -2   4  -6 23162.4 2077.42   5
   2  -4   6 25756.1 2335.18   4
  -2   4  -7 17219.4 1832.83   5
  -2   4  -8 0.84508 199.248   5
  -2   4  -9 1360.90 596.983   5
  -2   4 -10 316.959 270.732   5
  -2   4 -11 1924.33 729.944   5
  -2   4 -12 2467.74 787.172   5
  -2   4 -13 3906.29 995.533   5
  -2   4 -14 71.0594 364.511   5
  -2   4 -15 3154.16 949.461   5
  -2   4 -16 504.644 427.526   5
  -2   4 -17 5134.77 1244.54   5
  -2   4 -18 1858.93 790.337   5
   2  -4  19-101.707 376.103   3
  -2   4 -19 475.663 454.159   5
  -2   4 -20 888.723 550.862   5
   2  -4  20-605.423 549.655   3
  -2   4 -21 1521.79 749.615   5
   2  -4  21 798.223 471.908   3
   2  -4  22-464.244 460.077   3
   2  -4  23-367.812 608.882   3
   2   5 -20 380.963 442.582   5
   2   5 -19 438.430 395.673   5
   2   5 -18-130.227 214.566   5
   2   5 -17 1191.04 626.988   5
   2   5 -16 251.515 303.319   5
   2   5 -15 107.785 348.998   5
   2   5 -14 5.20604 87.9075   5
   2   5 -13 374.032 309.213   5
   2   5 -12 730.440 450.942   5
   2   5 -11 158.943 227.074   5
  -2  -5  10 356.643 166.011   4
   2   5 -10 979.052 432.769   5
  -2  -5   9-125.669 217.497   4
   2   5  -9 405.874 325.961   5
   2   5  -8-78.3591 176.360   5
  -2  -5   8-153.691 271.938   4
   2   5  -7 1221.18 458.948   5
  -2  -5   7 1341.80 572.364   4
   2   5  -6 7184.36 1111.96   5
  -2  -5   6 6768.84 1385.12   4
  -2  -5   5 3992.40 1073.06   4
   2   5  -5 3545.71 747.004   5
  -2  -5   4 2348.74 764.012   4
   2   5  -4 2112.12 560.546   5
  -2   5   3 1795.67 558.167   5
  -2  -5   3 1402.19 613.430   4
   2   5  -3 1778.67 478.272   5
  -2   5   2 2024.39 580.143   5
  -2  -5   2 1982.02 705.926   4
   2  -5  -1 6624.07 1203.78   4
  -2   5   1 7622.83 1153.24   5
  -2  -5   1 6315.73 1207.86   4
   2  -5   0 255.237 253.753   4
  -2  -5   0-143.518 228.667   4
  -2   5   0-595.630 325.294   5
  -2  -5  -1 129.189 359.272   4
  -2   5  -1 894.703 397.951   5
   2  -5   1 788.360 395.673   4
  -2  -5  -2 4895.56 1022.53   4
  -2   5  -2 6173.42 1058.97   5
   2  -5   2 5877.46 1191.72   4
   2  -5   3-308.213 288.452   4
  -2   5  -3 349.605 280.531   5
   2  -5   4 3135.76 946.854   4
  -2   5  -4 1983.92 659.828   5
   2  -5   5-4.26149 209.491   4
  -2   5  -5 0.90804 221.529   5
  -2   5  -6 912.351 461.797   5
   2  -5   6 1400.91 539.232   4
  -2   5  -7 236.936 150.240   5
   2  -5   7 103.699 372.004   4
   2  -5   8-71.4791 185.649   4
  -2   5  -8 86.4389 57.7414   5
   2  -5   9 523.394 377.656   4
  -2   5  -9 154.477 182.193   5
  -2   5 -10 173.580 210.117   5
   2  -5  10-145.375 308.543   4
  -2   5 -11 28.4715 197.029   5
  -2   5 -12 676.127 474.721   5
  -2   5 -13 242.445 181.581   5
  -2   5 -14-27.1427 278.331   5
  -2   5 -15-22.0842 116.585   5
  -2   5 -16 493.642 481.048   5
  -2   5 -17 2756.87 983.440   5
  -2   5 -18 878.168 643.286   5
   2   6 -17-19.2825 168.775   5
  -2  -6  16 1141.52 707.343   4
   2   6 -16 186.758 316.189   5
  -2  -6  15 509.451 457.680   4
   2   6 -15 723.188 518.087   5
  -2  -6  14 215.955 189.508   4
   2   6 -14-7.39828 83.1931   5
  -2  -6  13 1214.04 632.300   4
   2   6 -13 1431.46 677.678   5
  -2  -6  12 1174.32 619.819   4
  -2  -6  11 36.9538 250.884   4
  -2  -6  10 14.2771 338.028   4
  -2  -6   9 788.521 494.431   4
  -2  -6   8 618.701 438.452   4
  -2  -6   7-45.1638 136.708   4
  -2  -6   6 405.041 408.579   4
  -2  -6   5 1086.98 610.601   4
  -2  -6   4 223.943 343.069   4
  -2  -6   3 251.561 249.381   4
  -2  -6   2 1787.57 775.538   4
  -2  -6   1 5155.97 1311.37   4
  -2  -6   0 1552.65 730.947   4
   2  -6   0 1140.58 602.952   4
   2  -6   1 1472.46 686.597   4
   2  -6   2 229.603 235.748   4
   2  -6   3-122.975 207.966   4
   2  -6   4 2427.14 855.419   4
   2  -6   5 648.631 525.036   4
   2  -6   6 605.673 474.229   4
  -2   6  -6 664.856 388.497   5
   2  -6   7 644.839 531.924   4
  -2   6  -7 780.183 448.915   5
  -2   6  -8 379.881 324.015   5
   2  -6   8 282.998 244.833   4
   2  -6   9-126.753 222.478   4
  -2   6  -9 529.134 425.669   5
  -2   6 -10 258.523 292.137   5
   2  -6  10 616.498 450.619   4
  -2   6 -11 147.376 138.029   5
   2  -6  11-611.771 474.066   4
   2  -6  12 746.336 541.873   4
  -2   6 -12 415.964 392.630   5
   2  -6  13 977.182 662.374   4
  -2   6 -13 272.493 195.793   5
   2  -6  14 268.545 388.864   4
  -2   6 -14 237.586 302.116   5
   2  -6  15 172.657 434.689   4
  -2   6 -15 233.448 353.910   5
  -2  -7   8-196.834 277.230   4
  -2  -7   7 403.827 428.084   4
  -2  -7   6 1118.64 665.618   4
  -2  -7   5 224.364 190.496   4
  -2  -7   4 301.573 220.172   4
  -2  -7   3-138.325 156.113   4
  -2  -7   2 222.924 342.931   4
  -2  -7   1 350.987 356.851   4
   2  -7   2 101.220 105.395   4
   2  -7   3 172.424 259.703   4
   2  -7   4 253.216 362.310   4
   2  -7   5-234.464 272.899   4
   2  -7   6-22.5344 179.857   4
   2  -7   7 236.883 310.563   4
   2  -7   8 1353.28 691.466   4
   3   0 -28-117.374 96.5376   5
   3   0 -27-39.0078 337.089   5
   3   0 -26-159.554 332.800   5
   3   0 -25 362.414 416.036   5
   3   0 -24 92.4979 242.736   5
   3   0 -23 2663.05 858.037   5
   3   0 -22 383.889 373.978   5
   3   0 -21 6222.20 1220.15   5
   3   0 -20 357.803 289.813   5
   3   0 -19 808.515 369.776   5
   3   0 -18-245.953 86.9952   5
   3   0 -17 9912.00 1398.54   5
   3   0 -16 2935.94 866.025   5
   3   0 -15 2784.21 737.863   5
   3   0 -14 437.018 313.229   5
   3   0 -13 1840.67 523.386   5
   3   0 -12 77.8125 52.3935   5
   3   0 -11 47431.5 2437.51   5
   3   0 -10 1221.71 542.565   5
   3   0  -9 131265. 3667.96   5
   3   0  -8-0.56096 98.7220   5
   3   0  -7 100465. 2859.36   5
   3   0  -6 6.59869 65.4515   5
   3   0  -5 98884.7 2404.48   5
   3   0  -4 18.5296 26.1070   5
   3   0  -3 800.926 198.217   5
  -3   0   2 31.1002 42.1952   3
  -3   0   0-0.36667 38.4497   1
  -3   0  -1 44751.4 1324.64   2
  -3   0  -2 195.349 94.9191   2
  -3   0  -2-9.92597 39.7379   5
  -3   0  -3 259674. 3659.68   5
  -3   0  -3 257380. 3756.87   2
  -3   0  -4-15.7034 41.7315   5
  -3   0  -4-24.9108 37.3297   2
  -3   0  -5 13908.2 988.371   5
  -3   0  -5 13426.0 1016.40   2
  -3   0  -6 161.064 86.4392   2
  -3   0  -6-39.3020 78.4258   5
  -3   0  -7 10921.6 1022.86   2
  -3   0  -7 10918.4 998.456   5
  -3   0  -8 70.9490 155.590   5
  -3   0  -9 1925.23 489.764   5
  -3   0 -10 1208.19 510.437   5
  -3   0 -11 1010.48 408.643   5
  -3   0 -12 165.580 235.226   5
  -3   0 -13 577.996 343.441   5
  -3   0 -14-111.777 116.407   5
  -3   0 -15 720.587 399.467   5
  -3   0 -16 164.350 111.995   5
  -3   0 -17 9822.74 1435.50   5
  -3   0 -18 345.255 378.830   5
  -3   0 -19 5168.19 1102.61   5
  -3   0 -20 214.592 305.915   5
  -3   0 -21 9283.04 1547.79   5
  -3   0 -22 287.318 351.223   5
  -3   0 -23 2531.05 854.422   5
  -3   0 -24 407.008 390.837   5
  -3   0 -25 677.996 447.186   5
  -3   0 -26 386.624 383.346   5
  -3   0 -27 1475.16 749.070   5
   3  -1 -29-257.014 293.052   5
   3  -1 -28 82.4766 222.968   5
  -3  -1  27 784.400 849.589   3
   3  -1 -27 72.6286 200.203   5
   3   1 -27-57.3846 343.160   5
   3   1 -26 725.224 527.659   5
  -3  -1  26 709.957 829.861   3
   3  -1 -26 585.126 419.706   5
   3  -1 -25 43.7142 99.8720   5
  -3  -1  25 348.167 505.101   3
   3   1 -25 155.604 308.325   5
   3  -1 -24 348.128 312.898   5
   3   1 -24 203.385 309.139   5
  -3  -1  24 408.571 416.693   3
   3   1 -23-2.40303 210.167   5
  -3  -1  23-423.277 188.365   3
   3  -1 -23-152.181 150.121   5
  -3  -1  22 1736.75 810.022   3
   3  -1 -22 900.826 412.727   5
   3   1 -22 1055.17 612.098   5
   3   1 -21 2964.68 851.023   5
   3  -1 -21 3067.35 828.689   5
   3  -1 -20-25.3862 92.1707   5
   3   1 -20 20.9101 118.362   5
  -3  -1  20 417.124 449.604   3
   3   1 -19 1419.77 547.442   5
   3  -1 -19 1451.66 525.167   5
  -3  -1  19 1260.56 603.710   3
   3  -1 -18 3459.08 817.969   5
  -3  -1  18 4010.60 1016.75   3
   3   1 -18 3741.54 911.169   5
   3  -1 -17-65.2864 139.372   5
   3   1 -17-133.991 204.173   5
  -3  -1  17 278.233 354.298   3
   3  -1 -16 439.393 289.240   5
  -3  -1  16 1253.17 493.123   3
   3   1 -16 586.312 407.806   5
   3   1 -15 32.4413 294.386   5
  -3  -1  15 76.2773 321.045   3
   3  -1 -15 368.365 300.661   5
  -3  -1  14 3205.85 709.477   3
   3   1 -14 2728.81 710.282   5
   3  -1 -14 2787.82 646.511   5
  -3  -1  13 809.525 394.840   3
   3   1 -13 625.852 254.371   5
   3  -1 -13 486.144 235.229   5
   3   1 -12 12476.5 1357.61   5
   3  -1 -12 12022.2 1225.59   5
  -3  -1  12 12424.0 1291.87   3
   3  -1 -11 10838.1 1111.63   5
  -3  -1  11 10284.1 1100.56   3
   3   1 -11 9887.49 1140.56   5
   3   1 -10 13965.1 1310.39   5
  -3  -1  10 15569.1 1279.62   3
   3  -1 -10 15224.0 1255.03   5
  -3  -1   9 5663.03 754.027   3
   3  -1  -9 6213.65 773.708   5
   3   1  -9 6663.96 873.095   5
   3  -1  -8 50294.6 2095.08   5
  -3  -1   8 46274.4 2114.73   3
   3   1  -8 51707.8 2326.08   5
  -3  -1   7 176856. 3887.43   3
   3  -1  -7 183044. 3846.99   5
   3   1  -7 181220. 4103.37   5
  -3  -1   6 618298. 7022.81   3
   3   1  -6 617000. 7047.49   5
  -3  -1   5 827711. 7945.52   3
  -3   1   5 835742. 8040.99   5
   3   1  -5 834036. 7643.29   5
   3   1  -4 193074. 3346.03   5
  -3  -1   4 190463. 3653.17   3
   3   1  -3 38516.7 1358.05   5
  -3  -1   3 39441.6 953.058   2
  -3  -1   2 117453. 1787.15   2
  -3   1   2 112358. 2148.85   4
  -3   1   2 112842. 2624.36   1
   3   1  -2 114031. 1864.84   2
   3   1  -2 114838. 2024.14   5
  -3  -1   1 103139. 2438.14   4
   3  -1  -1 106748. 1826.87   4
  -3  -1   1 108248. 1688.67   5
  -3  -1   1 109399. 1925.04   2
   3   1  -1 105446. 1950.05   2
  -3   1   1 103707. 1874.06   4
   3   1  -1 108719. 1601.73   5
  -3   1   1 103218. 2531.99   1
  -3   1   0 2084.53 364.008   1
  -3  -1   0 1679.06 295.652   4
   3  -1   0 1740.02 238.687   4
   3   1   0 1775.83 280.191   2
  -3  -1   0 1546.39 258.910   2
  -3   1  -1 830134. 6184.87   2
  -3  -1  -1 884253. 6966.56   2
  -3  -1  -1 860355. 7090.03   4
  -3   1  -2 105590. 2154.78   2
   3  -1   2 106552. 2059.67   3
  -3  -1  -2 108614. 2674.20   2
  -3   1  -2 103523. 1972.03   3
   3  -1   3 33664.9 1235.03   3
  -3  -1  -3 32025.6 931.044   5
  -3   1  -3 33420.2 1598.73   5
   3   1   3 32038.6 951.668   5
  -3  -1  -3 31922.3 1568.13   2
   3  -1   3 30765.6 1329.85   2
  -3   1  -3 33377.5 1255.66   2
  -3  -1  -4 424.221 122.802   5
   3  -1   4 570.370 206.269   2
  -3   1  -4 361.399 139.944   2
  -3   1  -4 195.566 94.8778   5
   3   1   4 244.134 102.433   5
   3  -1   4 426.738 171.816   3
  -3   1  -5 1457.29 360.405   5
   3  -1   5 1563.22 334.489   2
  -3   1  -5 1246.43 271.554   2
   3   1   5 1113.27 240.272   5
   3  -1   5 1705.11 316.436   3
  -3  -1  -5 1236.52 237.537   5
   3  -1   6 2585.93 419.380   3
  -3  -1  -6 2460.44 382.074   5
   3   1   6 2078.97 375.110   5
  -3   1  -6 1937.45 427.853   5
  -3   1  -6 1786.80 367.466   2
  -3   1  -7 6818.12 735.373   2
  -3  -1  -7 6586.63 702.301   5
  -3   1  -7 7859.51 936.791   5
  -3   1  -8 47909.9 2412.95   5
  -3  -1  -8 49627.7 2051.85   5
  -3   1  -8 45723.4 2037.42   2
  -3  -1  -9 38629.3 1923.89   5
  -3   1  -9 38509.3 1964.00   2
  -3   1  -9 37005.0 2211.06   5
  -3  -1 -10 30005.4 1796.64   5
  -3   1 -10 28494.9 2017.82   5
  -3  -1 -11 17206.2 1433.36   5
  -3   1 -11 18263.3 1662.05   5
  -3  -1 -12 2817.59 607.870   5
  -3   1 -12 2834.21 709.648   5
  -3   1 -13 2284.52 617.666   5
  -3  -1 -13 2357.79 575.804   5
  -3  -1 -14 35.0225 215.874   5
  -3   1 -14 143.091 164.400   5
  -3  -1 -15 117.318 170.953   5
  -3   1 -15 39.3636 184.062   5
  -3   1 -16 10673.9 1511.27   5
  -3  -1 -16 13426.4 1530.64   5
  -3   1 -17 14685.5 1812.11   5
  -3  -1 -17 13934.7 1613.33   5
  -3  -1 -18 825.266 376.044   5
  -3   1 -18 955.598 516.587   5
  -3   1 -19 1503.93 648.394   5
  -3  -1 -19 409.565 225.229   5
  -3  -1 -20-69.5650 193.834   5
  -3   1 -20 314.748 325.584   5
  -3  -1 -21 277.187 238.952   5
  -3   1 -21 624.754 427.536   5
  -3   1 -22-45.4766 129.200   5
   3  -1  22 443.660 808.321   3
  -3  -1 -22 113.806 86.9667   5
  -3   1 -23 266.254 370.961   5
  -3  -1 -23 388.677 369.865   5
  -3   1 -24 865.750 564.705   5
  -3  -1 -24 1896.86 723.834   5
  -3  -1 -25 828.653 491.792   5
   3  -1  25 1381.31 1166.13   3
  -3   1 -25 641.384 508.421   5
   3  -1  26 1979.70 1349.68   3
   3   2 -26 194.711 323.432   5
  -3  -2  26 597.381 620.554   3
   3  -2 -26 33.5788 76.7623   5
   3  -2 -25 60.4400 260.870   5
   3   2 -25-318.558 332.425   5
  -3  -2  25 639.464 519.504   3
  -3  -2  24-107.938 383.552   3
   3   2 -24 199.197 245.962   5
   3  -2 -24 385.247 350.083   5
   3   2 -23 1075.90 534.669   5
   3  -2 -23 686.618 371.590   5
  -3  -2  23 1315.87 756.580   3
   3   2 -22-158.015 340.822   5
  -3  -2  22 570.369 322.726   3
   3  -2 -22 55.2856 103.203   5
  -3  -2  21 492.327 441.557   3
   3   2 -21 1174.47 554.634   5
   3  -2 -21 444.663 375.367   5
   3   2 -20 724.152 392.209   5
  -3  -2  20 781.995 539.243   3
   3  -2 -20 510.670 376.017   5
  -3  -2  19 288.299 386.470   3
   3  -2 -19 329.646 290.194   5
   3   2 -19 278.516 422.366   5
   3  -2 -18 135.772 103.284   5
  -3  -2  18 41.6789 311.607   3
   3   2 -18-65.0525 157.243   5
   3  -2 -17 222.562 261.148   5
   3   2 -17 602.202 512.307   5
  -3  -2  17 1321.61 648.290   3
  -3  -2  16 27022.0 2345.91   3
   3   2 -16 29458.8 2473.01   5
   3  -2 -16 27369.7 2154.91   5
   3  -2 -15 722.023 341.889   5
   3   2 -15 662.826 346.713   5
  -3  -2  15 725.617 361.114   3
  -3  -2  14 1021.72 435.050   3
   3   2 -14 848.059 398.669   5
   3  -2 -14 1188.31 419.962   5
   3   2 -13 2046.74 611.886   5
  -3  -2  13 1069.49 469.865   3
   3  -2 -13 1915.35 543.303   5
   3   2 -12 13272.4 1475.02   5
  -3  -2  12 10675.2 969.861   2
  -3  -2  12 11933.8 1357.63   3
  -3  -2  11 22213.4 1230.55   2
  -3  -2  11 23297.7 1855.35   3
   3   2 -10 128122. 4271.97   5
  -3  -2  10 136444. 4365.21   3
  -3  -2   9 9235.09 1107.97   3
   3   2  -9 7444.48 973.330   5
  -3  -2   9 6913.90 531.781   2
   3  -2  -8 16361.4 1303.00   1
   3   2  -8 15931.4 1381.41   5
  -3  -2   8 14172.0 599.700   2
  -3  -2   8 15229.1 1405.53   3
   3   2  -7 52583.9 2375.18   5
  -3  -2   7 49066.8 2483.66   3
   3  -2  -7 48460.9 2188.01   1
   3   2  -6 36312.5 1875.10   5
   3  -2  -6 37243.0 1875.10   1
   3   2  -5 9508.58 896.071   5
   3  -2  -5 7227.43 821.353   1
   3   2  -4 60386.1 2110.17   5
   3  -2  -4 60537.4 2345.65   1
  -3  -2   3 7913.07 749.204   5
   3   2  -3 8452.50 468.271   2
   3   2  -3 8403.92 720.484   5
   3  -2  -3 8830.99 907.938   1
  -3  -2   2 46.8313 35.3752   5
   3   2  -2 62.1865 47.9741   5
   3   2  -2 17.9062 54.5129   2
   3  -2  -2 23.1273 49.6322   4
   3  -2  -1-35.3011 82.6207   4
  -3  -2   1 39.4268 48.7619   5
   3   2  -1 42.5594 30.2470   5
   3   2  -1 54.7368 53.5228   2
  -3  -2   1-83.5190 184.901   4
   3   2   0 13722.3 594.337   5
   3   2   0 12070.4 870.881   2
  -3  -2   0 13189.5 1156.44   4
   3  -2   0 13714.9 1019.63   4
  -3  -2  -1 10089.3 994.376   4
   3  -2   1 11153.8 942.230   4
   3   2   2 12255.1 824.441   1
  -3   2  -2 12027.3 818.970   2
  -3   2  -2 13500.1 1164.85   5
  -3  -2  -2 12768.8 1150.68   4
   3   2   3 26373.4 1139.13   1
  -3   2  -3 27019.7 1673.86   5
  -3   2  -3 25536.9 1188.48   2
  -3   2  -4 215.526 151.673   2
  -3   2  -4 36.6410 163.503   5
   3  -2   5 90790.9 2953.92   3
   3   2   5 82332.7 1583.77   5
  -3   2  -5 90078.3 3257.91   5
  -3   2  -5 85155.3 2153.03   2
  -3  -2  -5 85742.7 2045.44   1
  -3   2  -6 33497.4 2072.80   5
  -3  -2  -6 34104.6 1318.11   1
   3  -2   6 27284.9 1433.17   2
   3   2   6 31837.3 1181.35   5
   3  -2   6 34762.5 1893.12   3
  -3  -2  -6 34791.4 1216.80   5
  -3   2  -6 31568.1 1352.53   2
   3  -2   7 6693.65 854.034   3
  -3  -2  -7 6540.10 597.398   1
  -3  -2  -7 5467.90 546.641   5
  -3   2  -7 6153.40 637.248   2
   3   2   7 5982.08 591.962   5
  -3   2  -7 5496.20 876.517   5
   3  -2   8 131.907 186.415   3
  -3  -2  -8-128.389 94.3996   5
   3   2   8 47.2013 72.5451   5
  -3   2  -8 11.0252 241.228   5
  -3   2  -8 51.6888 51.3670   2
  -3   2  -9 2909.01 652.201   5
  -3  -2  -9 2275.57 421.820   5
  -3   2  -9 1854.89 395.584   2
   3  -2   9 1871.67 431.447   3
  -3  -2 -10 1185.93 334.265   5
   3  -2  10 1175.17 395.426   3
  -3   2 -10 1194.25 459.706   5
   3  -2  11 21802.1 1775.39   3
  -3   2 -11 20860.7 1904.18   5
  -3  -2 -11 19156.9 1422.38   5
   3  -2  12 1933.16 579.341   3
  -3  -2 -12 1895.18 484.139   5
  -3   2 -12 2118.97 657.126   5
   3  -2  13 6740.11 1086.41   3
  -3   2 -13 6060.24 1101.01   5
  -3  -2 -13 5356.99 832.794   5
   3  -2  14 10856.4 1461.57   3
  -3   2 -14 9149.89 1391.14   5
  -3  -2 -14 9609.54 1154.78   5
  -3  -2 -15 286.813 170.040   5
   3  -2  15 849.647 448.188   3
  -3   2 -15 286.370 244.295   5
   3  -2  16 3566.96 913.504   3
  -3  -2 -16 1431.27 479.906   5
  -3   2 -16 2222.16 715.842   5
  -3  -2 -17 174.879 79.7298   5
  -3   2 -17 371.829 179.533   5
   3  -2  17 407.244 272.495   3
  -3   2 -18 98.0573 233.823   5
   3  -2  18 134.206 333.142   3
  -3  -2 -18 299.698 303.069   5
  -3   2 -19 1890.17 715.173   5
  -3  -2 -19 1401.73 497.695   5
  -3  -2 -20-41.6160 183.872   5
  -3   2 -20-63.9829 311.368   5
   3  -2  20 664.091 529.444   3
   3  -2  21 1650.90 798.263   3
  -3   2 -21 1114.18 547.985   5
   3  -2  22 495.675 610.816   3
  -3   2 -22 450.063 372.332   5
   3  -2  23-364.585 417.650   3
  -3   2 -23-20.8863 140.687   5
  -3   2 -24 359.500 376.363   5
   3  -2  24 311.481 608.690   3
   3  -2  25 210.098 713.258   3
   3  -2  26-307.944 564.616   3
  -3  -3  25-453.948 438.908   3
   3   3 -24-280.577 87.6956   5
  -3  -3  24 363.315 522.469   3
  -3  -3  23 854.024 541.078   3
   3   3 -23 231.011 198.940   5
  -3  -3  22 1340.76 650.577   3
   3   3 -22-132.877 424.971   5
  -3  -3  21 237.263 229.187   3
   3   3 -21 121.117 238.894   5
  -3  -3  20-70.1138 196.498   3
   3   3 -20 574.829 394.674   5
   3   3 -19 828.588 597.459   5
  -3  -3  19 993.463 540.380   3
  -3  -3  18 537.943 518.156   3
   3   3 -18 1311.30 588.527   5
   3   3 -17 2402.83 857.083   5
  -3  -3  17 680.111 421.194   3
  -3  -3  16 12904.0 1791.47   3
   3   3 -16 13381.0 1771.31   5
   3  -3 -15 4866.09 894.372   1
  -3  -3  15 4797.22 1034.78   3
   3   3 -15 4905.67 1013.27   5
   3   3 -14 54424.8 3337.45   5
  -3  -3  14 52337.8 3344.62   3
   3  -3 -14 48083.7 2733.17   1
   3   3 -13 36543.9 2671.03   5
  -3  -3  13 30763.1 2514.67   3
   3  -3 -13 33158.6 2214.93   1
   3  -3 -12 3727.35 715.765   1
   3   3 -12 3928.87 851.788   5
  -3  -3  12 2983.13 723.491   3
   3   3 -11 674.927 358.321   5
   3  -3 -11 1030.89 386.828   1
   3   3 -10 14412.6 1524.20   5
   3  -3 -10 13320.7 1347.35   1
   3  -3  -9-55.8925 153.279   1
   3   3  -9 78.5472 163.182   5
   3  -3  -8 3704.21 691.698   1
   3   3  -8 4381.16 766.170   5
   3  -3  -7 12844.4 1283.34   1
   3   3  -7 12661.3 1278.92   5
   3   3  -6 36567.1 2050.94   5
   3  -3  -6 37073.0 2195.66   1
   3   3  -5 1039.90 306.409   5
   3   3  -4 3971.40 612.017   5
  -3  -3   4 3775.43 772.291   4
   3   3  -4 2900.36 258.955   2
  -3  -3   3 1003.30 378.725   4
   3   3  -3 518.193 145.522   2
   3   3  -3 522.508 187.364   5
   3   3  -2 1277.07 257.937   2
   3   3  -2 1899.25 365.237   5
  -3  -3   2 1504.74 464.550   4
   3  -3  -2 2156.18 498.034   4
   3  -3  -1 869.322 269.229   4
  -3  -3   1 1363.02 435.281   4
   3   3  -1 1061.78 271.990   2
   3   3  -1 1346.61 274.131   5
   3  -3   0 3881.82 685.090   4
  -3  -3   0 4358.14 806.724   4
   3   3   0 4591.75 465.845   5
  -3   3  -1 26833.1 1813.66   5
   3   3   1 24318.9 921.708   5
  -3  -3  -1 24953.7 1894.01   4
   3  -3   1 26528.0 1823.64   4
   3   3   2 16654.1 600.235   5
  -3  -3  -2 18603.7 1647.58   4
   3  -3   2 20245.4 1635.75   4
  -3   3  -2 18480.4 1554.48   5
   3  -3   3 7671.16 1048.94   4
  -3   3  -3 5695.14 878.710   5
  -3   3  -3 6932.72 691.094   2
  -3   3  -4 3382.61 459.421   2
  -3   3  -4 3713.17 712.777   5
  -3   3  -5 3043.14 652.485   5
  -3   3  -5 3344.15 430.074   2
  -3   3  -6 3936.13 469.151   2
  -3   3  -6 5287.99 893.750   5
   3   3   7 17386.2 763.219   5
  -3   3  -7 20160.8 1827.01   5
  -3   3  -7 18548.6 1017.93   2
  -3  -3  -8 10539.9 948.925   1
  -3   3  -8 11624.1 1435.57   5
   3   3   8 9321.06 666.367   5
  -3   3  -8 9888.30 781.417   2
  -3  -3  -9 3103.95 531.852   1
  -3   3  -9 2670.49 439.497   2
  -3   3  -9 3648.21 848.185   5
  -3  -3 -10 1522.83 361.254   1
   3  -3  10 1992.29 512.389   3
  -3   3 -10 2157.16 646.859   5
  -3   3 -11-94.8011 216.835   5
   3  -3  11 294.197 263.103   3
  -3  -3 -11 160.546 138.122   1
   3  -3  12 1820.17 535.287   3
  -3   3 -12 2209.00 703.760   5
  -3  -3 -12 1989.95 436.237   1
  -3  -3 -13 236.031 142.462   1
   3  -3  13 230.062 184.227   3
  -3   3 -13 79.8647 82.2165   5
   3  -3  14-295.919 289.274   3
  -3  -3 -14-48.2870 110.588   1
  -3   3 -14-201.704 142.655   5
   3  -3  15 2675.89 745.054   3
  -3   3 -15 2072.43 729.642   5
   3  -3  16 317.389 327.953   3
  -3   3 -16-79.5458 118.846   5
   3  -3  17 1414.08 602.088   3
  -3   3 -17 482.488 283.343   5
   3  -3  18 828.203 389.111   3
  -3   3 -18 765.964 426.479   5
  -3   3 -19 266.291 422.420   5
   3  -3  19-260.372 510.667   3
   3  -3  20 604.064 476.714   3
  -3   3 -20 386.083 295.890   5
  -3   3 -21-33.7543 130.289   5
   3  -3  21 469.207 335.583   3
   3  -3  22 127.868 263.612   3
  -3   3 -22-74.3991 128.617   5
   3  -3  23-654.336 581.217   3
   3  -3  24-601.365 588.047   3
   3  -3  25-849.368 729.680   3
  -3  -4  23-470.471 492.150   3
  -3  -4  22 23.7674 295.718   3
   3   4 -22-119.507 189.232   5
  -3  -4  21 392.027 324.741   3
   3   4 -21 477.503 382.997   5
  -3  -4  20 274.935 251.827   3
   3   4 -20 352.991 361.059   5
   3   4 -19-138.671 152.975   5
   3  -4 -19 222.944 187.818   1
   3   4 -18 432.223 338.485   5
   3  -4 -18 251.320 239.374   1
   3   4 -17 1331.25 598.322   5
   3  -4 -17 791.935 355.067   1
   3  -4 -16 7451.62 1135.48   1
   3   4 -16 3004.54 862.127   5
   3   4 -15 5086.87 1103.87   5
   3  -4 -15 4638.83 907.728   1
   3   4 -14 299.184 211.115   5
   3  -4 -14 123.045 114.700   1
   3   4 -13 365.325 180.736   5
   3  -4 -13 79.7393 52.1544   1
   3  -4 -12-174.356 249.518   1
   3   4 -12 157.518 228.191   5
   3  -4 -11 623.828 353.156   1
   3   4 -11 36.5226 169.415   5
   3  -4 -10 4096.14 823.269   1
   3   4 -10 3398.43 784.803   5
   3   4  -9 24933.4 2095.90   5
   3   4  -8 1043.80 396.701   5
   3   4  -7 258.172 228.243   5
  -3  -4   7-32.4795 124.329   4
   3   4  -6 705.517 319.355   5
  -3  -4   6 1446.38 574.479   4
   3   4  -5 42.5823 134.603   5
  -3  -4   5 80.8406 175.744   4
   3   4  -4 5928.24 828.802   5
  -3  -4   4 5207.32 1025.44   4
  -3  -4   3 11543.0 1545.59   4
   3   4  -3 9480.89 993.787   5
   3   4  -2 269.948 165.273   5
   3  -4  -2 220.731 444.089   4
  -3  -4   2 469.249 280.920   4
  -3   4   1 1076.95 412.633   5
   3   4  -1 951.894 276.448   5
   3  -4  -1 1247.21 446.650   4
  -3  -4   1 781.207 504.515   4
  -3   4   0-103.570 87.7845   5
   3   4   0-33.7559 76.6905   5
  -3  -4   0-145.632 311.112   4
   3  -4   0-132.803 189.305   4
  -3  -4  -1 342.665 198.401   4
   3  -4   1 261.861 175.840   4
  -3   4  -1 526.556 305.511   5
   3   4   1 324.452 119.895   5
   3  -4   2 1397.72 496.878   4
  -3   4  -2 1938.17 530.659   5
  -3  -4  -2 939.408 413.563   4
   3   4   2 1310.11 228.645   5
   3  -4   3 10038.9 1349.92   4
  -3   4  -3 9113.90 878.529   2
  -3   4  -3 9866.07 1297.23   5
   3  -4   4 5712.53 1032.34   4
  -3   4  -4 6975.08 1115.83   5
  -3   4  -4 5749.86 642.006   2
   3  -4   5 16.8612 116.729   4
  -3   4  -5 15.8782 48.2906   2
  -3   4  -5 16.3621 175.325   5
   3  -4   6 4439.40 960.987   4
  -3   4  -6 4674.89 952.264   5
  -3   4  -7 1340.67 550.683   5
  -3   4  -8 1194.46 525.466   5
  -3   4  -9 2152.26 683.485   5
  -3   4 -10-0.96529 258.379   5
  -3   4 -11 462.286 367.701   5
  -3   4 -12 4441.05 1046.02   5
  -3   4 -13 1561.55 668.757   5
  -3   4 -14 204.489 265.035   5
  -3   4 -15 2466.78 856.148   5
  -3   4 -16 1089.99 595.313   5
  -3   4 -17 373.405 337.934   5
  -3   4 -18 700.923 494.595   5
  -3   4 -19 32.9694 221.219   5
   3  -4  19-246.008 392.265   3
  -3   4 -20 998.784 559.417   5
   3  -4  20 86.6869 283.281   3
   3  -4  21-604.189 520.712   3
   3  -4  22 363.587 467.871   3
   3   5 -20 1119.40 711.212   5
   3   5 -19-130.159 238.730   5
   3   5 -18 592.511 517.857   5
   3   5 -17 5.24958 247.557   5
   3   5 -16-304.926 302.595   5
   3   5 -15 681.924 442.213   5
   3   5 -14-20.2863 66.2751   5
   3   5 -13-666.444 411.280   5
   3   5 -12 465.054 459.092   5
  -3  -5  11 522.128 419.160   4
   3   5 -11 1006.49 504.576   5
  -3  -5  10 294.399 307.347   4
   3   5 -10 38.3847 198.255   5
  -3  -5   9-1202.82 592.016   4
   3   5  -9 99.1736 199.653   5
  -3  -5   8 568.840 391.981   4
   3   5  -8 345.945 275.244   5
   3   5  -7-86.0789 158.656   5
  -3  -5   7-27.2571 204.524   4
  -3  -5   6 620.511 423.082   4
   3   5  -6 557.379 294.858   5
  -3  -5   5 1768.32 741.981   4
   3   5  -5 1421.78 467.451   5
   3   5  -4 12201.5 1315.32   5
  -3   5   4 13170.6 1548.90   5
  -3  -5   4 12690.0 1816.96   4
  -3  -5   3-375.276 334.213   4
  -3   5   3 248.489 262.032   5
  -3  -5   2 1224.39 569.544   4
  -3   5   2 1575.19 523.243   5
   3  -5  -1-707.102 396.506   4
  -3  -5   1-178.173 420.117   4
  -3   5   1-170.766 286.418   5
  -3   5   0 2941.72 717.903   5
   3  -5   0 2363.60 736.827   4
  -3  -5   0 2230.15 679.396   4
  -3  -5  -1 2161.77 701.962   4
   3  -5   1 3521.18 886.533   4
  -3   5  -1 3609.77 837.877   5
  -3   5  -2 210.922 248.820   5
   3  -5   2 165.036 164.563   4
  -3  -5  -2-260.823 454.945   4
   3  -5   3 10716.1 1600.00   4
  -3   5  -3 11132.3 1521.73   5
   3  -5   4 526.940 489.088   4
  -3   5  -4 456.730 262.240   5
   3  -5   5 2063.95 713.827   4
  -3   5  -5 1668.06 631.929   5
   3  -5   6 2041.06 703.144   4
  -3   5  -6 2672.94 821.349   5
  -3   5  -7 0.51777 122.598   5
   3  -5   7-236.404 188.962   4
  -3   5  -8 108.767 96.5969   5
   3  -5   8 397.913 390.361   4
  -3   5  -9 3886.02 996.715   5
   3  -5   9 4018.54 1042.82   4
  -3   5 -10 2164.33 814.179   5
   3  -5  10 1995.79 784.913   4
  -3   5 -11 144.761 262.090   5
  -3   5 -12-123.799 190.723   5
  -3   5 -13 183.074 176.644   5
  -3   5 -14 139.770 345.101   5
  -3   5 -15-286.016 359.248   5
  -3   5 -16 794.486 514.861   5
  -3   5 -17 1170.55 655.520   5
  -3   5 -18 2123.88 909.673   5
   3   6 -17 247.352 318.345   5
  -3  -6  16 368.453 520.303   4
   3   6 -16 770.128 536.765   5
  -3  -6  15 15.2111 267.394   4
   3   6 -15 42.3515 159.314   5
  -3  -6  14 488.388 338.511   4
  -3  -6  13 303.021 173.214   4
  -3  -6  12 54.3291 153.392   4
  -3  -6  11 169.083 241.273   4
  -3  -6  10-211.182 343.611   4
  -3  -6   9 488.561 367.466   4
  -3  -6   8 1839.55 837.849   4
  -3  -6   7 198.407 176.150   4
  -3  -6   6 1034.15 629.297   4
  -3  -6   5 608.578 492.986   4
  -3  -6   4 1089.96 593.602   4
  -3  -6   3-329.254 374.952   4
  -3  -6   2 4614.20 1209.29   4
  -3  -6   1 4446.69 1174.39   4
  -3  -6   0 2095.47 784.205   4
   3  -6   0 1082.37 639.708   4
   3  -6   1 78.0877 429.657   4
   3  -6   2 628.483 732.588   4
   3  -6   3 600.246 439.861   4
   3  -6   4-130.517 175.794   4
   3  -6   5 597.403 481.633   4
  -3   6  -5-192.019 199.812   5
   3  -6   6 552.494 379.567   4
  -3   6  -6 286.833 246.913   5
  -3   6  -7-95.1478 214.681   5
   3  -6   7 178.010 271.416   4
   3  -6   8-24.1140 163.126   4
  -3   6  -8 450.695 414.232   5
   3  -6   9-169.968 200.054   4
  -3   6  -9 112.321 255.228   5
  -3   6 -10 436.325 475.405   5
   3  -6  10 343.023 385.822   4
  -3   6 -11 343.519 344.840   5
   3  -6  11 150.026 255.963   4
   3  -6  12 70.1950 152.171   4
  -3   6 -12 48.4968 162.750   5
   3  -6  13-81.4520 128.167   4
  -3   6 -13-172.918 333.616   5
  -3   6 -14 24.9047 215.126   5
  -3   6 -15 455.584 471.713   5
  -3  -7   7 427.145 456.597   4
  -3  -7   6-152.900 353.826   4
  -3  -7   5 639.143 437.451   4
  -3  -7   4 82.6196 177.367   4
  -3  -7   3-50.0853 217.270   4
  -3  -7   2 445.460 468.123   4
  -3  -7   1 1294.95 639.390   4
   3  -7   2 1075.26 574.712   4
   3  -7   3 318.548 328.058   4
   3  -7   4 412.818 446.235   4
   3  -7   5 729.183 542.108   4
   3  -7   6 440.488 419.595   4
   4   0 -28 705.645 455.004   5
   4   0 -27 500.355 487.900   5
   4   0 -26 252.548 291.807   5
   4   0 -25 120.361 226.871   5
   4   0 -24 1758.91 721.212   5
   4   0 -23-128.573 180.998   5
   4   0 -22 6571.09 1323.29   5
   4   0 -21 879.795 519.297   5
   4   0 -20 4902.44 1076.19   5
   4   0 -19 2820.86 886.514   5
   4   0 -18 1798.38 719.569   5
   4   0 -17-191.645 168.846   5
   4   0 -16 61615.5 3336.66   5
   4   0 -15 627.219 382.313   5
   4   0 -14 7972.81 1118.03   5
   4   0 -13 1268.73 495.901   5
   4   0 -12 48297.7 2608.45   5
   4   0 -11 336.417 316.285   5
   4   0 -10 93188.2 3253.41   5
   4   0  -9 229.305 232.507   5
   4   0  -8 14164.3 1138.84   5
   4   0  -7 78.4344 101.019   5
   4   0  -6 11848.6 915.634   5
   4   0  -5-74.5548 115.082   5
   4   0  -4 61580.2 1879.87   5
  -4   0   3 5.51896 69.8596   3
  -4   0   2 10964.1 516.257   3
  -4   0   2 10578.1 714.728   2
  -4   0   1 49.4233 77.9152   2
  -4   0   0 118715. 1486.54   4
  -4   0   0 118494. 2318.36   2
  -4   0   0 116876. 1900.94   1
  -4   0  -1 128.306 98.0778   2
  -4   0  -1 4.69947 47.8506   1
  -4   0  -2 1312.76 266.905   2
  -4   0  -3-4.51928 90.0763   5
  -4   0  -3 516.445 255.942   2
  -4   0  -4 590.938 211.885   5
  -4   0  -4 792.602 258.392   2
  -4   0  -5-69.9445 149.454   2
  -4   0  -5-156.361 141.290   5
  -4   0  -6 35609.1 1822.17   2
  -4   0  -6 35061.4 1746.58   5
  -4   0  -7-48.0305 172.165   5
  -4   0  -7-23.1298 73.9614   2
  -4   0  -8 338.446 151.210   5
  -4   0  -8 393.053 202.490   2
  -4   0  -9 31.6213 117.196   5
  -4   0 -10 4686.65 774.050   5
  -4   0 -11 293.124 283.761   5
  -4   0 -12 2284.40 595.701   5
  -4   0 -13 87.5690 175.359   5
  -4   0 -14 232.690 255.608   5
  -4   0 -15-129.559 185.638   5
  -4   0 -16 668.964 320.466   5
  -4   0 -17 395.829 362.260   5
  -4   0 -18 3291.56 904.357   5
  -4   0 -19 384.153 418.180   5
  -4   0 -20 1056.47 550.723   5
  -4   0 -21 596.628 439.445   5
  -4   0 -22 687.156 467.183   5
  -4   0 -23 19.4396 204.616   5
  -4   0 -24 529.048 427.588   5
  -4   0 -25-196.526 184.043   5
  -4   0 -26 191.232 165.911   5
   4  -1 -29 794.345 503.987   5
   4  -1 -28 1399.43 658.886   5
   4   1 -27-41.8482 197.387   5
  -4  -1  27 25.9335 417.023   3
   4  -1 -27 238.729 306.546   5
   4   1 -26 52.3224 163.967   5
  -4  -1  26 916.647 905.808   3
   4  -1 -26 291.243 326.335   5
   4  -1 -25 274.975 296.392   5
   4   1 -25 822.253 536.420   5
  -4  -1  25 1468.76 901.522   3
   4   1 -24 830.565 422.461   5
   4  -1 -24 338.005 294.046   5
  -4  -1  24 1310.52 815.447   3
   4   1 -23 678.435 430.339   5
   4  -1 -23 493.857 341.578   5
   4  -1 -22 2187.48 747.209   5
  -4  -1  22 4775.63 1274.67   3
   4   1 -22 2500.11 827.124   5
   4   1 -21 1644.84 663.000   5
  -4  -1  21 1617.05 747.573   3
   4  -1 -21 1522.17 574.204   5
   4   1 -20 3257.82 877.640   5
   4  -1 -20 4150.59 940.125   5
  -4  -1  20 4145.86 1024.05   3
   4   1 -19 1241.50 533.257   5
   4  -1 -19 938.410 419.748   5
  -4  -1  19 1339.68 539.495   3
   4  -1 -18 77.2634 260.861   5
  -4  -1  18 476.561 368.050   3
   4   1 -18 25.8065 242.537   5
   4  -1 -17 1003.44 440.211   5
  -4  -1  17 2259.27 756.960   3
   4   1 -17 1187.97 453.111   5
   4  -1 -16 2276.25 653.275   5
   4   1 -16 3108.54 807.161   5
  -4  -1  16 4171.23 927.044   3
   4   1 -15 3761.63 820.594   5
  -4  -1  15 4742.57 932.574   3
   4  -1 -15 3876.08 761.068   5
   4   1 -14 513.716 336.421   5
  -4  -1  14 601.875 378.579   3
   4  -1 -14 876.345 345.236   5
   4   1 -13 4465.10 850.797   5
  -4  -1  13 6463.30 931.561   3
   4  -1 -13 5645.45 877.944   5
  -4  -1  12 21910.1 1674.79   3
   4   1 -12 23723.0 1858.64   5
   4  -1 -12 21822.7 1662.44   5
   4   1 -11 16833.5 1501.29   5
   4  -1 -11 20312.8 1537.32   5
  -4  -1  11 19601.1 1526.57   3
  -4  -1  10 55941.0 2465.32   3
   4   1 -10 55787.3 2626.26   5
   4  -1 -10 55885.0 2480.80   5
  -4  -1   9 3285.30 614.778   3
   4  -1  -9 3427.11 586.389   5
   4   1  -9 3559.70 639.947   5
  -4  -1   8 9731.45 983.083   3
   4  -1  -8 10355.5 994.276   5
   4   1  -7 10404.6 986.269   5
  -4  -1   7 11373.8 1011.19   3
  -4  -1   6 13.4802 102.980   3
   4   1  -6-208.528 218.023   5
   4   1  -5 79231.1 2357.35   5
  -4  -1   5 80177.1 2510.01   3
  -4  -1   4 79251.2 1691.44   2
  -4  -1   4 77047.0 2366.66   3
   4   1  -4 77173.4 2140.21   5
   4   1  -3 34186.4 1275.05   5
   4   1  -3 33491.7 1174.90   2
  -4  -1   3 35048.4 1106.13   2
  -4  -1   2 96668.7 2065.80   5
  -4  -1   2 103010. 1988.07   2
   4   1  -2 103504. 1971.94   5
  -4   1   2 102097. 2621.40   1
   4   1  -2 99191.4 2112.37   2
  -4  -1   1 89605.5 2351.65   4
  -4  -1   1 86949.4 1975.37   2
  -4   1   1 85561.3 2443.49   1
  -4  -1   1 86170.0 1675.49   5
  -4   1   1 82824.4 1562.54   4
   4   1  -1 85290.6 2050.31   2
  -4   1   0 446930. 5060.87   2
  -4  -1   0 446666. 5242.75   4
  -4  -1   0 454569. 4893.02   2
   4  -1   0 466192. 3461.67   4
   4   1   0 429901. 5017.96   2
  -4   1   0 440397. 5603.25   1
  -4  -1  -1 507880. 5675.77   4
  -4  -1  -1 513104. 5625.78   2
  -4   1  -1 501442. 3690.99   3
  -4   1  -1 509964. 5262.40   2
  -4  -1  -2 43168.2 1045.60   5
   4  -1   2 44808.4 1304.50   3
  -4  -1  -2 42785.4 1780.10   2
  -4   1  -2 43342.6 1543.74   2
  -4  -1  -3 94705.0 1791.29   5
  -4   1  -3 96546.7 2353.12   2
  -4  -1  -3 95762.2 2834.32   2
   4  -1   3 98744.5 2077.84   3
  -4   1  -3 96637.7 2852.65   5
   4  -1   3 89853.0 2621.57   2
  -4  -1  -4 7413.23 571.738   5
  -4   1  -4 7886.85 848.458   5
  -4  -1  -4 7175.29 824.525   2
   4  -1   4 7817.73 789.376   2
   4  -1   4 7773.61 632.118   3
  -4   1  -4 6878.85 667.111   2
   4  -1   5 15491.4 948.860   3
  -4   1  -5 17058.5 1315.26   5
  -4  -1  -5 14814.5 1258.57   2
  -4   1  -5 16196.5 1069.93   2
  -4  -1  -5 15280.0 919.924   5
   4   1   5 15657.1 967.042   5
   4   1   6 143852. 3272.84   5
  -4   1  -6 152696. 4099.41   5
  -4   1  -6 154672. 3441.70   2
  -4  -1  -6 154409. 3193.23   5
  -4   1  -7 1872.54 404.395   2
  -4   1  -7 2039.04 481.919   5
  -4  -1  -7 1150.35 298.492   5
  -4   1  -8 26453.2 1613.12   2
  -4   1  -8 26363.9 1841.31   5
  -4  -1  -8 26411.2 1520.17   5
  -4  -1  -9 19863.6 1397.94   5
  -4   1  -9 17852.1 1569.27   5
  -4   1  -9 19242.6 1447.62   2
  -4   1 -10 20294.0 1739.92   5
  -4   1 -10 20075.7 1542.52   2
  -4  -1 -10 20938.6 1519.13   5
  -4  -1 -11 3399.81 635.563   5
  -4   1 -11 4343.91 822.901   5
  -4  -1 -12 3825.72 706.248   5
  -4   1 -12 4331.49 844.380   5
  -4   1 -13 2849.86 723.542   5
  -4  -1 -13 1999.62 542.854   5
  -4   1 -14 544.527 358.125   5
  -4  -1 -14 960.274 398.957   5
  -4  -1 -15 1138.94 414.192   5
  -4   1 -15 673.122 367.818   5
  -4   1 -16 17243.0 1943.34   5
  -4  -1 -16 17537.9 1770.69   5
  -4   1 -17 494.049 366.988   5
  -4  -1 -17-50.0940 178.148   5
  -4   1 -18 766.433 469.422   5
  -4  -1 -18-200.108 253.734   5
  -4   1 -19 517.948 342.866   5
  -4  -1 -19 303.320 264.584   5
  -4  -1 -20 933.395 421.642   5
  -4   1 -20 2804.23 872.349   5
  -4  -1 -21 4774.40 1058.31   5
  -4   1 -21 3571.01 1012.22   5
  -4   1 -22 3787.69 1086.47   5
  -4  -1 -22 3773.35 991.222   5
  -4   1 -23 3537.46 1044.71   5
  -4  -1 -23 3573.65 990.035   5
  -4  -1 -24 264.304 256.450   5
  -4   1 -24 346.027 386.148   5
  -4   1 -25 27.3333 357.723   5
   4  -1  25 138.096 330.397   3
   4  -1  26 700.509 1083.41   3
   4  -2 -27 713.003 517.349   5
   4   2 -26 265.282 279.704   5
  -4  -2  26 966.849 912.120   3
   4  -2 -26 47.3474 151.387   5
   4  -2 -25 97.7083 160.261   5
   4   2 -25 88.5098 160.527   5
   4  -2 -24-616.730 401.730   5
  -4  -2  24 1854.07 906.185   3
   4   2 -24 1013.95 588.736   5
  -4  -2  23 1119.35 810.550   3
   4  -2 -23 1021.35 505.448   5
   4   2 -23 848.886 412.259   5
  -4  -2  22 1023.26 571.828   3
   4  -2 -22 325.389 351.293   5
   4   2 -22-429.150 352.295   5
   4   2 -21 1592.32 657.554   5
   4  -2 -21 1899.14 651.292   5
  -4  -2  21 1054.13 515.372   3
   4  -2 -20 2963.67 800.998   5
   4   2 -20 2453.18 825.645   5
  -4  -2  20 4039.49 1040.66   3
  -4  -2  19 3016.96 917.341   3
   4   2 -19 2925.75 809.661   5
   4  -2 -19 3553.51 867.204   5
   4  -2 -18 3474.49 835.765   5
  -4  -2  18 4238.09 981.760   3
   4   2 -18 3598.95 892.923   5
   4  -2 -17 25752.4 2184.34   5
   4   2 -17 23610.4 2303.95   5
  -4  -2  17 26884.3 2431.68   3
   4  -2 -16 2910.59 721.643   5
   4   2 -16 3149.62 820.249   5
  -4  -2  16 3913.52 931.521   3
   4  -2 -15 341.801 290.073   5
  -4  -2  15-120.390 142.722   3
   4   2 -15-43.6242 136.520   5
   4   2 -14 1047.44 428.006   5
  -4  -2  14 1536.38 498.306   3
   4   2 -13 1846.67 564.880   5
  -4  -2  13 1600.14 519.139   3
   4   2 -12 7240.62 1074.97   5
  -4  -2  12 7995.01 1106.39   3
  -4  -2  11 761.285 386.161   3
   4   2 -11 1751.98 499.879   5
  -4  -2  10 8780.55 1140.07   3
   4   2 -10 8658.40 1109.18   5
  -4  -2   9 11160.6 1250.15   3
   4   2  -9 11335.5 1211.51   5
   4   2  -8 5907.52 827.774   5
   4  -2  -8 4961.57 750.604   1
  -4  -2   8 5212.65 807.028   3
  -4  -2   8 4629.82 351.403   2
   4   2  -7 6130.50 795.577   5
   4  -2  -7 6621.81 839.758   1
   4   2  -6 717.169 243.547   5
   4  -2  -6 890.916 311.595   1
   4   2  -5 10134.9 914.022   5
   4  -2  -5 10265.2 1013.06   1
  -4  -2   5 10459.4 483.769   2
   4   2  -4 2176.14 263.308   2
  -4  -2   4 2205.55 262.995   2
  -4  -2   4 2192.71 420.856   5
   4   2  -4 2479.07 418.957   5
  -4  -2   3 47687.2 1418.21   2
  -4  -2   3 40805.7 1664.54   5
   4   2  -3 43589.8 1310.79   2
   4   2  -3 45063.2 1641.68   5
   4   2  -2 34512.4 1292.88   5
   4   2  -2 31552.6 1252.93   2
  -4  -2   2 33717.1 1348.67   2
  -4  -2   2 31204.5 1285.05   5
  -4  -2   2 33037.7 1875.46   4
   4   2  -1 10084.7 582.223   5
   4   2  -1 8670.24 699.758   2
  -4   2   1 8279.84 834.804   4
  -4  -2   1 8414.08 943.178   4
  -4  -2   1 8800.64 575.332   5
   4  -2  -1 9714.58 821.984   4
   4   2   0 4139.87 531.989   2
  -4  -2   0 4402.77 666.516   4
   4  -2   0 4740.36 572.814   4
  -4   2  -1 17419.4 1105.11   2
  -4  -2  -1 16855.3 1332.88   4
   4  -2   1 17245.1 1151.86   4
  -4   2  -2 74058.6 2210.06   2
  -4  -2  -2 69866.1 2743.17   4
   4   2   2 73349.7 1777.83   1
  -4   2  -3 100.696 64.1710   5
  -4   2  -3 75.9156 120.320   2
  -4   2  -4 15787.4 1002.39   2
  -4   2  -4 15680.8 1383.82   5
  -4  -2  -5 13330.4 735.649   1
  -4  -2  -5 12787.5 599.420   5
  -4   2  -5 13582.4 1290.47   5
   4  -2   5 13366.3 1127.75   3
  -4   2  -5 12314.7 907.298   2
  -4  -2  -6 234.273 104.378   1
   4  -2   6 509.740 272.068   3
  -4   2  -6 257.786 125.250   2
  -4  -2  -6 134.565 64.7282   5
  -4   2  -6 330.317 168.079   5
   4   2   6 100.061 49.2700   5
  -4   2  -7 14217.8 1423.72   5
  -4   2  -7 13267.6 1003.92   2
   4  -2   7 14246.8 1245.42   3
  -4  -2  -7 13949.4 885.614   5
  -4  -2  -7 12318.2 767.451   1
   4   2   7 13206.7 876.061   5
  -4   2  -8 2527.98 464.413   2
  -4   2  -8 2643.88 610.194   5
   4   2   8 2045.56 393.292   5
  -4  -2  -8 2871.92 438.857   5
   4  -2   8 1829.32 439.478   3
   4  -2   9 542.049 196.189   3
  -4   2  -9 624.325 255.975   2
  -4  -2  -9 343.480 173.576   5
  -4   2  -9 407.983 223.042   5
   4  -2  10 1354.57 421.112   3
  -4  -2 -10 1122.88 309.457   5
  -4   2 -10 1662.95 549.009   5
  -4   2 -10 1161.04 348.740   2
  -4  -2 -11 368.441 227.402   5
  -4   2 -11 590.365 322.249   5
  -4   2 -11 277.396 221.248   2
   4  -2  11 787.680 367.160   3
   4  -2  12 1123.07 426.018   3
  -4  -2 -12 1202.85 380.843   5
  -4   2 -12 1730.97 538.851   5
  -4  -2 -13 13400.4 1313.29   5
  -4   2 -13 15733.6 1804.68   5
  -4  -2 -14 93.3547 110.003   5
  -4   2 -14-75.0975 198.809   5
   4  -2  14 363.085 335.175   3
  -4  -2 -15 1337.72 413.133   5
  -4   2 -15 1233.58 544.342   5
   4  -2  15 1728.99 636.179   3
  -4   2 -16 436.882 337.806   5
   4  -2  16 277.801 349.656   3
  -4  -2 -16 265.948 166.080   5
  -4  -2 -17 515.241 345.165   5
   4  -2  17 569.375 488.485   3
  -4   2 -17 270.885 226.956   5
  -4  -2 -18 1286.54 487.882   5
  -4   2 -18 1630.93 666.761   5
   4  -2  18 1004.86 593.023   3
  -4   2 -19 352.812 267.990   5
   4  -2  19-352.268 316.538   3
  -4  -2 -19-52.5319 195.055   5
  -4   2 -20 1077.39 608.741   5
   4  -2  20 1889.87 967.798   3
  -4   2 -21 945.466 586.692   5
   4  -2  21 1603.69 1105.51   3
   4  -2  22 204.528 418.691   3
  -4   2 -22 160.080 198.096   5
   4  -2  23 552.545 857.786   3
  -4   2 -23 604.025 488.245   5
   4  -2  24-943.483 784.459   3
  -4   2 -24 765.403 547.912   5
   4  -2  25 307.056 612.212   3
  -4  -3  25 43.6547 348.344   3
   4   3 -24 417.885 393.348   5
  -4  -3  24 900.596 522.106   3
   4   3 -23 366.153 353.697   5
  -4  -3  23 843.964 481.004   3
  -4  -3  22 300.126 340.429   3
   4   3 -22 219.078 132.288   5
  -4  -3  21 1879.91 825.895   3
   4   3 -21 670.948 435.811   5
  -4  -3  20-165.460 285.483   3
   4   3 -20-468.544 384.600   5
   4   3 -19 593.116 517.900   5
  -4  -3  19 1173.26 644.903   3
   4   3 -18 6146.19 1228.49   5
  -4  -3  18 4734.61 1090.16   3
  -4  -3  17 25583.2 2518.44   3
   4   3 -17 22930.2 2355.43   5
  -4  -3  16 1913.05 685.659   3
   4  -3 -16 2578.01 708.858   1
   4   3 -16 2556.74 790.091   5
   4   3 -15-147.810 362.162   5
  -4  -3  15 61.6720 257.043   3
   4  -3 -15 573.074 265.384   1
   4  -3 -14 579.762 389.447   1
   4   3 -14 286.541 337.305   5
  -4  -3  14 140.027 187.457   3
   4  -3 -13 15121.6 1549.80   1
   4   3 -13 14166.9 1660.90   5
  -4  -3  13 13152.6 1639.64   3
   4   3 -12 5341.81 987.068   5
   4  -3 -12 4664.04 862.320   1
  -4  -3  12 6558.10 1156.33   3
   4  -3 -11 3224.78 678.782   1
   4   3 -11 3776.18 787.612   5
   4  -3 -10-35.8451 105.487   1
   4   3 -10 375.899 312.166   5
   4  -3  -9 4384.61 798.109   1
   4   3  -9 5228.30 872.420   5
   4   3  -8 1906.76 504.547   5
   4  -3  -8 2079.24 565.106   1
   4  -3  -7 34.1577 163.183   1
   4   3  -7-108.829 46.9097   5
   4  -3  -6 105.781 110.982   1
   4   3  -6 43.2841 82.1209   5
   4   3  -5 241.843 169.139   5
  -4  -3   4 242.360 163.514   4
   4   3  -4 88.9856 68.7329   2
   4   3  -4 36.6696 53.9815   5
   4   3  -3 361.791 147.354   5
   4   3  -3 222.203 114.890   2
  -4  -3   3 212.490 85.9390   4
   4  -3  -2 3596.63 635.488   4
   4   3  -2 4795.16 553.957   5
  -4  -3   2 4305.86 809.297   4
   4   3  -2 3804.85 485.180   2
  -4  -3   1 985.599 416.615   4
   4   3  -1 1192.24 239.268   5
   4  -3  -1 1688.33 418.076   4
  -4  -3   0 7801.10 1081.16   4
   4   3   0 8292.24 544.578   5
   4  -3   0 7572.46 945.550   4
  -4  -3  -1 65706.5 3084.12   4
   4  -3   1 67647.5 2860.89   4
  -4   3  -2 9272.85 1126.11   5
   4  -3   2 9245.52 1081.32   4
  -4   3  -2 9447.11 902.302   2
  -4  -3  -2 9103.20 1134.35   4
  -4   3  -3 9426.68 844.694   2
  -4   3  -3 9222.54 1152.45   5
   4  -3   3 10481.1 1179.80   4
  -4   3  -4 7631.35 739.772   2
  -4   3  -4 7924.16 1082.63   5
  -4   3  -5 13272.0 941.069   2
  -4   3  -5 14018.8 1489.73   5
  -4   3  -6 1572.14 525.710   5
  -4   3  -6 1745.48 329.982   2
  -4   3  -7 160.171 131.919   2
  -4   3  -7 30.1278 143.218   5
  -4   3  -8 1104.50 275.050   2
  -4   3  -8 1417.64 471.659   5
   4   3   8 931.746 188.629   5
  -4  -3  -9 260.493 149.278   1
  -4   3  -9 154.097 107.742   2
  -4   3  -9 70.1266 207.126   5
   4  -3  10 3078.18 704.977   3
  -4   3 -10 3400.28 550.040   2
  -4  -3 -10 2671.37 462.121   1
  -4   3 -10 3287.98 820.036   5
  -4   3 -11 113.570 310.579   5
   4  -3  11-18.9919 199.159   3
  -4  -3 -11 250.641 133.719   1
  -4   3 -12-74.8593 180.262   5
  -4  -3 -12 331.272 164.926   1
   4  -3  12 353.789 375.792   3
   4  -3  13 1124.95 353.549   3
  -4   3 -13 1400.98 543.497   5
   4  -3  14 1042.38 424.656   3
  -4   3 -14 211.851 169.788   5
  -4   3 -15 593.335 376.634   5
   4  -3  15 355.236 294.392   3
   4  -3  16-144.682 262.453   3
  -4   3 -16 65.2623 89.9508   5
   4  -3  17 222.142 356.616   3
  -4   3 -17-276.748 252.116   5
  -4   3 -18 213.015 228.216   5
   4  -3  18 104.987 165.007   3
   4  -3  19-379.999 429.869   3
  -4   3 -19-111.344 244.685   5
   4  -3  20 695.903 576.874   3
  -4   3 -20 1518.93 705.624   5
   4  -3  21-748.837 533.801   3
  -4   3 -21 687.992 479.797   5
  -4   3 -22 271.978 312.677   5
   4  -3  22 943.993 687.218   3
   4  -3  23 868.111 710.097   3
   4  -3  24-514.644 686.855   3
  -4  -4  23 462.626 384.971   3
   4   4 -23 1060.72 676.154   5
   4   4 -22 609.079 468.808   5
  -4  -4  22-228.619 483.165   3
  -4  -4  21-495.314 581.722   3
   4   4 -21 3.43022 386.435   5
   4  -4 -20 541.087 326.465   1
   4   4 -20 236.416 488.866   5
   4   4 -19 457.160 387.688   5
   4  -4 -19 207.093 156.119   1
   4   4 -18 246.560 360.934   5
   4  -4 -18 47.0971 69.9169   1
   4   4 -17 806.133 465.035   5
   4  -4 -17 726.986 381.982   1
   4  -4 -16 2442.32 680.835   1
   4   4 -16 2673.60 798.766   5
   4   4 -15 3475.73 893.227   5
   4  -4 -15 3553.87 818.512   1
   4   4 -14 759.012 380.792   5
   4  -4 -14 220.851 88.7697   1
   4  -4 -13 281.580 274.397   1
   4   4 -13-142.573 194.352   5
   4   4 -12 4022.23 912.640   5
   4  -4 -12 3521.75 799.624   1
   4  -4 -11 1685.61 554.732   1
   4   4 -11 1299.86 487.360   5
   4  -4 -10 4774.79 924.874   1
   4   4 -10 5170.79 961.563   5
   4   4  -9 5624.66 968.582   5
   4  -4  -9 5173.41 947.816   1
   4   4  -8 2201.36 591.847   5
   4   4  -7 14.9789 189.877   5
  -4  -4   7 193.924 237.124   4
   4   4  -6 3080.15 631.934   5
  -4  -4   6 2463.28 694.586   4
  -4  -4   5 1088.93 515.964   4
   4   4  -5 840.370 301.766   5
  -4  -4   4 1222.10 601.617   4
   4   4  -4 934.237 323.377   5
   4   4  -3 14660.5 1178.93   5
  -4  -4   3 16685.9 1834.50   4
  -4  -4   2-120.196 322.171   4
   4   4  -2-31.8649 107.504   5
   4  -4  -2-181.295 180.677   4
   4  -4  -1-122.436 246.833   4
   4   4  -1 93.7945 65.0160   5
  -4  -4   1 249.021 230.673   4
   4   4   0 1091.63 237.250   5
  -4   4   0 1497.17 469.473   5
   4  -4   0 1097.18 376.358   4
  -4  -4   0 1490.36 519.670   4
   4   4   1 14242.3 708.915   5
   4  -4   1 16625.7 1685.07   4
  -4   4  -1 18695.9 1779.07   5
  -4  -4  -1 16077.1 1771.27   4
   4  -4   2-35.3573 66.1905   4
  -4  -4  -2-186.895 345.443   4
  -4   4  -2-20.3037 120.202   2
  -4   4  -2-227.243 284.934   5
   4  -4   3 63.0255 303.411   4
  -4   4  -3 7.34372 86.6897   2
  -4   4  -3-67.3155 106.121   5
   4  -4   4 1708.75 589.375   4
  -4   4  -4 1098.69 316.867   2
  -4   4  -4 1113.71 420.565   5
  -4   4  -5 7474.15 1217.39   5
  -4   4  -5 6676.32 694.395   2
   4  -4   5 8783.55 1314.83   4
  -4   4  -6 731.041 226.885   2
  -4   4  -6 671.325 353.066   5
   4  -4   6 1378.50 571.458   4
  -4   4  -7 1612.70 547.577   5
  -4   4  -8 4590.02 1015.04   5
  -4   4  -9 2596.46 780.145   5
  -4   4 -10 358.832 203.582   5
  -4   4 -11-289.611 367.650   5
  -4   4 -12 1165.75 590.426   5
  -4   4 -13 3661.07 969.396   5
  -4   4 -14 252.102 156.699   5
  -4   4 -15 453.309 352.988   5
  -4   4 -16-88.7723 323.763   5
  -4   4 -17 1336.20 663.275   5
  -4   4 -18 443.493 419.011   5
  -4   4 -19 1610.10 729.249   5
   4  -4  20 1250.67 558.804   3
  -4   4 -20 1647.47 767.626   5
   4  -4  21-682.070 555.009   3
   4   5 -21 519.037 467.518   5
   4   5 -20-35.4113 126.455   5
   4   5 -19 306.588 308.316   5
   4   5 -18 431.620 425.634   5
   4   5 -17-68.4390 347.940   5
   4   5 -16 188.204 219.183   5
   4  -5 -16 260.315 231.672   1
   4  -5 -15 60.8353 76.1103   1
   4   5 -15 161.640 264.682   5
   4   5 -14 1.10010 259.577   5
   4   5 -13-35.4015 124.186   5
   4   5 -12-70.9611 92.2028   5
  -4  -5  11 1002.42 473.509   4
   4   5 -11 649.863 372.320   5
   4   5 -10 123.821 173.386   5
  -4  -5  10-179.553 417.724   4
   4   5  -9-166.439 190.205   5
  -4  -5   9 120.805 86.0379   4
  -4  -5   8 2970.32 898.434   4
   4   5  -8 2224.39 636.481   5
   4   5  -7 5384.54 951.704   5
  -4  -5   7 7293.22 1444.61   4
  -4  -5   6 2694.81 871.122   4
   4   5  -6 1575.29 510.554   5
  -4  -5   5 9734.45 1609.31   4
  -4  -5   4 12931.8 1845.69   4
  -4  -5   3 2497.88 792.320   4
  -4   5   3 4562.33 998.692   5
  -4  -5   2 13366.3 1808.73   4
  -4   5   2 14522.9 1724.32   5
  -4  -5   1 10813.6 1629.31   4
  -4   5   1 12575.0 1611.87   5
   4  -5  -1 9720.11 1455.25   4
  -4  -5   0 3828.75 1023.86   4
  -4   5   0 5438.98 1080.03   5
   4  -5   0 3085.85 857.600   4
  -4  -5  -1 6063.38 1182.87   4
   4  -5   1 5748.51 1130.44   4
  -4   5  -1 5926.80 1125.17   5
   4  -5   2 3526.87 894.421   4
  -4   5  -2 4514.97 983.034   5
  -4  -5  -2 3212.65 868.312   4
   4  -5   3 635.262 325.758   4
  -4   5  -3 501.435 272.891   5
   4  -5   4 1734.46 644.538   4
  -4   5  -4 1372.23 479.485   5
   4  -5   5-43.4048 220.659   4
  -4   5  -5 318.508 303.250   5
   4  -5   6 34.6800 132.435   4
  -4   5  -6-116.215 234.138   5
   4  -5   7 1456.46 706.470   4
  -4   5  -7 717.714 435.261   5
   4  -5   8 4534.86 1130.87   4
  -4   5  -8 3565.70 978.556   5
   4  -5   9 664.847 379.136   4
  -4   5  -9 361.279 269.660   5
   4  -5  10 1147.80 617.780   4
  -4   5 -10 192.200 375.332   5
   4  -5  11-37.7463 101.274   4
  -4   5 -11-151.283 192.760   5
  -4   5 -12 154.166 218.811   5
  -4   5 -13-23.0028 100.607   5
  -4   5 -14 1662.88 758.130   5
  -4   5 -15 885.869 582.898   5
  -4   5 -16-68.4345 306.621   5
  -4   5 -17 423.730 330.657   5
   4   6 -17 1559.66 686.409   5
  -4  -6  16 371.890 505.268   4
  -4  -6  15 1155.60 718.723   4
  -4  -6  14 77.7797 269.373   4
  -4  -6  13 216.570 278.622   4
  -4  -6  12 84.5834 358.077   4
  -4  -6  11 615.763 396.847   4
  -4  -6  10 915.475 484.333   4
  -4  -6   9 662.099 429.462   4
  -4  -6   8-272.495 494.715   4
  -4  -6   7 246.485 173.293   4
  -4  -6   6 260.849 384.274   4
  -4  -6   5 865.157 650.291   4
  -4  -6   4 1596.82 728.109   4
  -4  -6   3 875.567 456.044   4
  -4  -6   2 2676.55 958.574   4
  -4  -6   1 2403.70 861.379   4
   4  -6   0-69.4249 77.9967   4
  -4  -6   0 283.774 334.509   4
   4  -6   1 3348.98 994.124   4
   4  -6   2 127.752 157.541   4
   4  -6   3 1402.46 630.942   4
   4  -6   4 1423.18 638.182   4
  -4   6  -4 1027.21 507.479   5
   4  -6   5 2301.37 843.945   4
  -4   6  -5 2144.56 783.695   5
   4  -6   6 331.291 337.817   4
  -4   6  -6-37.4720 311.264   5
   4  -6   7 209.202 176.111   4
  -4   6  -7-196.342 294.927   5
   4  -6   8-91.2529 368.194   4
  -4   6  -8-236.838 278.255   5
   4  -6   9 417.915 458.075   4
  -4   6  -9 298.118 269.946   5
  -4   6 -10-158.710 260.321   5
   4  -6  10-29.3736 273.975   4
  -4   6 -11 6.71986 62.1723   5
  -4   6 -12 67.1490 182.629   5
  -4   6 -13-473.391 422.878   5
  -4   6 -14-19.0774 110.692   5
  -4  -7   6 976.872 591.852   4
  -4  -7   5 389.945 315.682   4
  -4  -7   4 415.636 302.152   4
  -4  -7   3-136.830 385.672   4
  -4  -7   2-231.389 114.526   4
  -4  -7   1 293.510 89.9806   4
   4  -7   2 786.745 526.589   4
   4  -7   3-145.761 234.104   4
   5   0 -28-518.706 357.887   5
   5   0 -27-75.3576 212.209   5
   5   0 -26 379.810 350.742   5
   5   0 -25 306.009 334.787   5
   5   0 -24 386.787 333.554   5
   5   0 -23 136.130 218.974   5
   5   0 -22-112.174 192.982   5
   5   0 -21-86.5667 193.527   5
   5   0 -20-183.844 179.381   5
   5   0 -19 23485.3 2276.18   5
   5   0 -18-9.78881 145.069   5
   5   0 -17 26402.6 2259.73   5
   5   0 -16 373.563 393.919   5
   5   0 -15 20452.4 1883.21   5
   5   0 -14-48.8773 97.8699   5
   5   0 -13 4739.11 818.697   5
   5   0 -12-52.4685 66.1614   5
   5   0 -11 21328.3 1627.11   5
   5   0 -10 165.006 124.424   5
   5   0  -9 23722.7 1552.76   5
   5   0  -8-15.6060 88.9145   5
   5   0  -7 53718.1 2129.55   5
   5   0  -6 72.6215 119.068   5
   5   0  -5 176095. 3563.57   5
  -5   0   4 164.277 118.210   3
  -5   0   2-61.6081 61.2188   3
  -5   0   2 5.57692 68.7859   2
   5   0  -2 13.1914 28.5509   3
  -5   0   1 397866. 3041.92   4
  -5   0   1 395081. 4734.58   2
  -5   0   0 43.9669 70.8089   1
  -5   0   0 45.4069 21.9789   4
   5   0   0 23.8172 51.4459   4
  -5   0   0 83.6161 111.871   2
  -5   0  -1 59813.2 1886.93   2
  -5   0  -1 58174.5 1529.85   1
   5   0   1 57850.9 1354.21   4
  -5   0  -2 60.6039 73.2147   2
  -5   0  -3 255854. 4361.59   2
  -5   0  -3 257466. 4252.91   5
  -5   0  -4 66.1067 81.1005   5
  -5   0  -4 81.2166 137.978   2
  -5   0  -5 2531.55 490.280   2
  -5   0  -5 1946.09 415.273   5
  -5   0  -6 16.9146 59.2753   2
  -5   0  -6-51.6814 98.2990   5
  -5   0  -7 80.6703 45.8350   5
  -5   0  -7 91.6653 92.0983   2
  -5   0  -8-52.5746 119.375   5
  -5   0  -8-12.2696 74.9256   2
  -5   0  -9 1783.22 482.542   2
  -5   0  -9 1449.04 425.573   5
  -5   0 -10 193.680 163.721   5
  -5   0 -11 524.725 315.769   5
  -5   0 -12 8.04112 123.620   5
  -5   0 -13 3723.35 784.943   5
  -5   0 -14 7.43224 139.178   5
  -5   0 -15 602.457 356.370   5
  -5   0 -16 754.642 463.608   5
  -5   0 -17 582.881 474.087   5
  -5   0 -18 333.919 346.462   5
  -5   0 -19 39529.1 3088.45   5
  -5   0 -20 818.506 487.396   5
  -5   0 -21 1077.34 549.341   5
  -5   0 -22 139.305 262.787   5
  -5   0 -23 16.0682 98.3330   5
  -5   0 -24-396.794 243.624   5
  -5   0 -25 1219.47 617.037   5
  -5   0 -26 303.741 367.683   5
   5  -1 -29 502.649 452.499   5
   5  -1 -28-320.987 361.593   5
   5  -1 -27 230.230 132.343   5
   5   1 -27 58.0093 155.630   5
   5  -1 -26 22.7490 219.594   5
   5   1 -26-333.588 278.710   5
   5  -1 -25 353.432 354.836   5
   5   1 -25 1073.77 573.494   5
  -5  -1  25 1214.23 789.897   3
   5   1 -24-223.172 250.500   5
   5  -1 -24 96.0724 321.683   5
   5   1 -23 204.586 171.904   5
  -5  -1  23-9.42807 211.819   3
   5  -1 -23 411.313 385.209   5
  -5  -1  22 1567.79 683.418   3
   5  -1 -22 833.823 523.188   5
   5   1 -22 650.744 431.992   5
  -5  -1  21 1983.08 846.701   3
   5   1 -21 1139.28 621.927   5
   5  -1 -21 94.7712 278.501   5
   5  -1 -20 184.426 165.682   5
  -5  -1  20 337.500 202.825   3
   5   1 -20 807.782 436.637   5
   5  -1 -19 2590.90 710.863   5
   5   1 -19 2736.84 815.003   5
  -5  -1  19 3139.13 902.909   3
   5   1 -18 259.509 134.461   5
  -5  -1  18 717.776 288.082   3
  -5  -1  17-5.81171 245.876   3
   5   1 -17-10.6234 297.218   5
   5  -1 -17 309.152 184.959   5
   5  -1 -16 319.533 237.891   5
   5   1 -16-8.38123 105.975   5
  -5  -1  16-108.208 192.277   3
  -5  -1  15 7658.87 1152.25   3
   5   1 -15 7771.88 1182.56   5
   5  -1 -15 5403.38 928.631   5
   5  -1 -14 2720.22 642.723   5
  -5  -1  14 2684.64 573.731   3
   5   1 -14 3495.57 786.959   5
   5  -1 -13-2.31647 76.7556   5
  -5  -1  13 33.1736 150.400   3
   5   1 -13 278.756 212.727   5
   5   1 -12 19779.4 1692.25   5
   5  -1 -12 18386.3 1557.52   5
  -5  -1  12 21471.3 1675.17   3
   5  -1 -11 8422.18 1016.61   5
  -5  -1  11 8575.42 1011.27   3
   5   1 -11 8288.16 1075.81   5
   5  -1 -10 1234.27 383.205   5
  -5  -1  10 1189.18 414.351   3
   5   1 -10 1202.33 383.396   5
   5   1  -9 2423.33 523.941   5
   5  -1  -9 2395.87 522.004   5
  -5  -1   9 2212.72 489.375   3
   5   1  -8 43900.5 2140.86   5
  -5  -1   8 42486.5 2087.12   3
  -5  -1   7 23183.2 1477.79   3
   5   1  -7 22199.5 1435.74   5
   5   1  -6 109971. 2982.44   5
  -5  -1   6 114252. 3173.26   3
  -5  -1   5 7336.85 611.963   2
  -5  -1   5 8392.74 832.793   3
   5   1  -5 8156.26 756.427   5
  -5  -1   4 97616.1 2138.80   2
   5   1  -4 96625.2 2400.63   5
  -5  -1   4 92222.9 2608.04   5
   5   1  -3 4529.93 501.643   2
  -5  -1   3 5324.59 575.832   5
   5   1  -3 4922.35 514.953   5
  -5  -1   3 5113.71 480.969   2
  -5  -1   2 224176. 3319.16   2
  -5  -1   2 222582. 3332.35   5
  -5   1   2 230140. 2630.56   4
   5   1  -2 220128. 3588.92   2
  -5  -1   1 78.2453 92.5324   4
  -5   1   1 289.445 85.7540   4
  -5  -1   1 433.538 169.192   2
   5   1  -1 158.245 94.8213   2
  -5  -1   1 223.799 103.475   5
  -5   1   0 632411. 6578.41   2
   5   1   0 646805. 6689.46   2
   5  -1   0 643939. 3590.91   4
  -5  -1   0 650527. 6330.39   2
  -5  -1   0 634075. 6505.02   4
  -5  -1  -1 698207. 7060.39   2
  -5  -1  -1 703037. 6920.57   4
  -5   1  -1 704019. 6795.66   2
   5  -1   2 55381.2 1387.94   3
  -5   1  -2 53388.5 1871.72   2
  -5  -1  -2 52042.7 2052.91   2
  -5  -1  -3 17173.5 878.501   5
   5  -1   3 18681.5 879.550   3
  -5  -1  -3 18461.6 1290.88   2
  -5   1  -3 17483.4 1105.41   2
   5  -1   4 198.183 96.5045   3
  -5   1  -4 107.578 39.2076   2
  -5   1  -4 137.828 91.8055   5
  -5  -1  -4 298.989 122.904   5
  -5  -1  -4 219.824 180.668   2
  -5   1  -5 40658.2 1807.51   2
   5  -1   5 38986.9 1490.75   3
  -5   1  -5 40077.9 2097.93   5
  -5  -1  -5 41873.2 2194.31   2
  -5  -1  -5 38501.1 1540.23   5
  -5  -1  -6 336.366 153.702   2
  -5   1  -6 453.349 182.820   2
  -5  -1  -6 248.562 94.1606   5
  -5   1  -6 233.391 160.382   5
  -5  -1  -7 40124.5 1821.05   5
  -5   1  -7 42042.3 2021.28   2
  -5   1  -7 43784.2 2330.00   5
  -5  -1  -8 13509.9 1112.74   5
  -5   1  -8 13894.1 1381.01   5
  -5   1  -8 13466.7 1205.13   2
  -5   1  -9 15623.3 1509.92   5
  -5   1  -9 14284.4 1288.33   2
  -5  -1  -9 15015.8 1244.76   5
  -5  -1 -10 63.9587 156.792   5
  -5   1 -10 128.020 204.838   5
  -5   1 -10-71.9870 199.795   2
  -5  -1 -11 5535.52 843.744   5
  -5   1 -11 6893.33 1069.60   5
  -5   1 -11 5164.98 848.453   2
  -5  -1 -12 29709.1 2002.21   5
  -5   1 -12 28072.1 2224.79   5
  -5   1 -13 1003.36 422.518   5
  -5  -1 -13 1187.74 420.526   5
  -5  -1 -14 3693.47 797.670   5
  -5   1 -14 4207.56 908.911   5
  -5  -1 -15 2411.82 659.134   5
  -5   1 -15 1515.89 589.976   5
  -5   1 -16 1158.68 531.200   5
  -5  -1 -16 512.549 346.087   5
  -5  -1 -17 656.834 389.638   5
  -5   1 -17 690.679 331.647   5
  -5  -1 -18 4622.37 968.393   5
  -5   1 -18 5830.10 1210.79   5
  -5  -1 -19 2857.71 796.228   5
  -5   1 -19 2820.32 872.399   5
  -5   1 -20 193.914 245.652   5
  -5  -1 -20 226.577 306.343   5
  -5  -1 -21 1468.95 590.801   5
  -5   1 -21 788.158 517.944   5
  -5  -1 -22 47.7560 169.941   5
  -5   1 -22 449.163 472.655   5
  -5   1 -23 809.365 515.085   5
  -5  -1 -23 404.138 392.322   5
   5  -1  23 710.880 897.073   3
  -5   1 -24 547.793 430.587   5
   5  -1  24 2297.12 1311.29   3
  -5   1 -25 344.173 136.387   5
   5  -1  25 47.1252 469.539   3
   5  -1  26 1635.60 1298.00   3
   5  -2 -28 266.973 295.088   5
   5  -2 -27-3.16966 94.9986   5
   5  -2 -26 623.173 371.872   5
   5   2 -26 1253.26 651.218   5
  -5  -2  25-415.135 514.648   3
   5   2 -25-173.848 411.896   5
   5  -2 -25-385.648 327.315   5
   5  -2 -24 241.155 248.507   5
   5   2 -24 211.834 372.081   5
  -5  -2  24 971.294 718.157   3
   5  -2 -23-40.6500 216.743   5
   5   2 -23 102.308 264.280   5
  -5  -2  23-61.9690 223.864   3
   5  -2 -22 316.986 325.169   5
  -5  -2  22 136.785 260.474   3
   5   2 -22 127.916 203.083   5
   5  -2 -21 1036.65 511.346   5
  -5  -2  21 629.299 489.631   3
   5   2 -21 479.823 379.763   5
   5   2 -20 3962.12 991.706   5
  -5  -2  20 5852.42 1278.15   3
   5  -2 -20 2837.11 812.773   5
   5   2 -19 9685.58 1546.74   5
  -5  -2  19 10673.3 1629.65   3
   5  -2 -19 10450.0 1490.57   5
   5  -2 -18 12817.0 1630.47   5
  -5  -2  18 10639.2 1533.19   3
   5   2 -18 10021.6 1537.70   5
   5   2 -17 1305.73 565.443   5
   5  -2 -17 1718.34 560.234   5
  -5  -2  17 1598.53 667.545   3
  -5  -2  16 939.165 402.358   3
   5   2 -16 1439.17 594.353   5
  -5  -2  15 718.502 451.801   3
   5   2 -15 2068.73 681.269   5
   5   2 -14 3891.40 858.886   5
  -5  -2  14 3654.80 764.782   3
   5   2 -13 7076.15 1100.13   5
  -5  -2  13 6904.90 1063.29   3
   5   2 -12 34889.0 2367.55   5
  -5  -2  12 31770.3 2264.13   3
  -5  -2  11 91881.5 3789.49   3
   5   2 -11 92413.2 3715.69   5
   5   2 -10 65624.6 3006.81   5
  -5  -2  10 65414.6 3139.68   3
   5   2  -9 88970.4 3341.01   5
  -5  -2   9 88293.1 3541.81   3
  -5  -2   8 40968.5 1195.34   2
  -5  -2   8 46450.1 2530.16   3
   5  -2  -8 44601.2 2298.13   1
   5   2  -8 45404.3 2294.60   5
   5  -2  -7 51321.0 2399.82   1
   5   2  -7 50795.0 2312.16   5
  -5  -2   7 46364.4 1169.05   2
   5   2  -6 21558.3 1425.74   5
  -5  -2   6 21632.5 809.186   2
   5   2  -5 5073.74 652.898   5
  -5  -2   5 4638.69 405.677   2
  -5  -2   4 373.333 137.898   2
   5   2  -4 492.062 150.849   2
   5   2  -4 362.280 165.183   5
  -5  -2   4 404.602 177.745   5
  -5  -2   3 7636.31 715.659   5
   5   2  -3 7033.61 644.337   5
  -5  -2   3 7318.82 619.437   2
  -5  -2   3 6809.99 878.941   4
   5   2  -3 6517.91 599.581   2
  -5  -2   2 24979.6 1642.17   4
   5   2  -2 24930.4 1057.24   5
  -5   2   2 23437.5 1379.07   4
  -5  -2   2 25378.2 1264.21   2
   5   2  -2 23307.5 1196.79   2
  -5  -2   2 23969.7 1109.56   5
   5   2  -1 6212.94 452.631   5
  -5  -2   1 5210.82 436.925   5
  -5  -2   1 5606.62 642.377   2
   5  -2  -1 6043.23 629.182   4
   5   2  -1 5238.93 595.434   2
  -5  -2   1 5347.36 752.498   4
  -5  -2   0 1042.03 343.034   4
  -5  -2   0 693.734 234.847   2
   5  -2   0 683.908 201.021   4
  -5  -2  -1 20430.7 1479.75   4
  -5   2  -1 15707.8 1019.40   3
   5  -2   1 20513.8 1214.31   4
  -5  -2  -1 19217.4 1361.07   2
  -5   2  -1 18444.5 1225.95   2
  -5  -2  -2 2203.37 498.249   4
  -5   2  -2 1346.08 285.571   3
  -5   2  -2 1757.16 362.897   2
   5   2   2 1805.60 258.921   1
  -5   2  -3 119836. 3844.23   5
  -5   2  -3 114483. 2914.23   2
  -5   2  -4 25414.2 1379.84   2
  -5   2  -4 26605.8 1856.10   5
   5  -2   5 31458.7 1725.04   3
  -5   2  -5 29544.0 2028.22   5
  -5   2  -5 28712.4 1484.55   2
  -5  -2  -5 30356.0 978.517   5
   5  -2   6-19.8903 125.933   3
  -5   2  -6 120.436 76.1780   2
  -5  -2  -6 64.1593 52.6938   1
  -5  -2  -6-35.9814 83.0611   5
  -5   2  -7 1297.68 330.178   2
  -5  -2  -7 1275.88 230.205   1
  -5  -2  -7 1299.31 274.267   5
   5  -2   7 1412.63 356.119   3
  -5   2  -7 831.506 346.210   5
  -5   2  -8 216.902 182.817   2
   5  -2   8 240.613 126.888   3
  -5  -2  -8 296.244 143.098   5
  -5   2  -8 425.756 189.199   5
   5   2   8 184.316 116.957   5
  -5   2  -9-61.5527 99.0499   2
   5  -2   9-40.4219 163.685   3
  -5  -2  -9 82.7395 104.429   5
  -5   2  -9 60.8810 147.682   5
  -5   2 -10 619.383 273.620   2
   5  -2  10 575.289 295.896   3
  -5   2 -10 1002.38 474.736   5
  -5  -2 -10 637.715 251.493   5
   5  -2  11 6033.37 944.843   3
  -5  -2 -11 5509.88 764.142   5
  -5   2 -11 5413.67 999.127   5
  -5   2 -11 3975.57 694.652   2
  -5   2 -12 17186.5 1853.94   5
  -5  -2 -12 16680.6 1401.47   5
   5  -2  12 20996.3 1852.30   3
   5  -2  13 7659.81 1204.17   3
  -5   2 -13 7215.46 1209.08   5
  -5  -2 -13 5629.76 849.496   5
  -5  -2 -14 1239.00 442.810   5
   5  -2  14 998.309 447.784   3
  -5   2 -14 1270.53 520.355   5
  -5   2 -15 844.725 464.962   5
  -5  -2 -15 452.949 203.472   5
   5  -2  15 174.952 341.702   3
  -5  -2 -16 7258.56 1072.30   5
   5  -2  16 9690.62 1585.98   3
  -5   2 -16 7761.33 1395.48   5
  -5  -2 -17 7368.08 1127.45   5
  -5   2 -17 6523.28 1293.09   5
   5  -2  17 9046.56 1606.04   3
  -5   2 -18 1738.98 698.468   5
   5  -2  18 1319.92 632.163   3
   5  -2  19-280.667 146.336   3
  -5   2 -19 13.8216 196.894   5
   5  -2  20 1719.39 836.522   3
  -5   2 -20 1012.25 597.767   5
   5  -2  21 48.0598 234.667   3
  -5   2 -21 322.244 251.435   5
  -5   2 -22 134.372 141.650   5
   5  -2  22-593.659 713.382   3
   5  -2  23 357.742 281.431   3
  -5   2 -23 910.927 557.441   5
   5  -2  24 645.200 1006.95   3
   5  -2  25 703.214 940.179   3
   5   3 -25 849.118 545.459   5
  -5  -3  25 684.502 546.458   3
   5   3 -24 480.058 434.814   5
  -5  -3  24 334.768 521.622   3
   5   3 -23 36.6871 131.796   5
  -5  -3  23 48.2197 199.846   3
  -5  -3  22-435.649 479.578   3
   5   3 -22-321.139 317.013   5
  -5  -3  21 251.694 454.753   3
   5   3 -21 185.846 270.655   5
  -5  -3  20 2070.74 735.414   3
   5   3 -20 1576.77 658.029   5
  -5  -3  19 1040.17 521.318   3
   5   3 -19 341.921 296.648   5
   5   3 -18 1518.26 614.511   5
  -5  -3  18 1567.42 682.514   3
  -5  -3  17 4037.19 1047.53   3
   5   3 -17 3941.63 946.960   5
  -5  -3  16 231.493 259.815   3
   5   3 -16 159.258 273.756   5
   5  -3 -16 241.671 264.556   1
   5  -3 -15 5912.86 1028.27   1
  -5  -3  15 6504.58 1210.68   3
   5   3 -15 5733.07 1100.55   5
  -5  -3  14 2337.39 703.340   3
   5  -3 -14 2741.99 680.298   1
   5   3 -14 2718.01 764.376   5
   5  -3 -13 144.001 152.482   1
  -5  -3  13-278.408 429.670   3
   5   3 -13 511.781 352.750   5
   5   3 -12 1995.65 579.557   5
   5  -3 -12 2036.00 595.302   1
   5   3 -11 9214.11 1236.08   5
   5  -3 -11 7889.87 1111.08   1
   5  -3 -10 1833.50 519.717   1
   5   3 -10 1898.31 567.975   5
   5  -3  -9 5062.48 858.280   1
   5   3  -9 4902.57 835.714   5
   5   3  -8 21301.9 1683.54   5
   5  -3  -8 19710.7 1702.82   1
   5   3  -7 698.611 299.284   5
   5  -3  -7 725.202 317.037   1
   5  -3  -6 9656.35 1165.06   1
   5   3  -6 10017.2 1053.86   5
  -5  -3   5 9286.15 1237.98   4
   5   3  -5 8386.26 551.081   2
   5   3  -5 9722.65 971.351   5
  -5  -3   4 462.937 204.358   4
   5   3  -4 698.337 188.266   2
   5   3  -4 583.169 210.927   5
  -5  -3   3 518.494 183.452   5
   5   3  -3 786.428 222.581   5
   5   3  -3 566.774 182.484   2
  -5  -3   3 603.621 306.999   4
  -5  -3   2 3070.09 663.779   4
  -5  -3   2 2692.95 410.891   5
   5   3  -2 3903.82 473.930   5
   5   3  -1 27103.6 1083.67   5
   5  -3  -1 29311.6 1799.14   4
  -5  -3   1 28671.9 2070.64   4
   5   3   0 24384.8 765.911   5
   5  -3   0 25982.6 1698.38   4
  -5  -3   0 27417.0 2030.97   4
  -5   3  -1 40344.7 2055.64   2
  -5  -3  -1 38202.0 2410.30   4
   5  -3   1 43012.7 2244.34   4
  -5  -3  -2 1517.58 450.621   4
   5  -3   2 818.175 269.572   4
  -5   3  -2 1886.88 413.045   2
  -5   3  -2 1453.23 483.861   5
   5   3   2 1062.80 288.829   1
  -5   3  -3 19045.2 1716.39   5
  -5   3  -3 19237.9 1287.14   2
   5   3   3 15856.9 1066.72   1
   5  -3   3 19506.6 1587.86   4
  -5   3  -4 11006.1 1335.10   5
  -5   3  -4 9536.30 883.895   2
  -5   3  -5 2424.48 440.300   2
  -5   3  -5 2026.09 577.246   5
  -5   3  -6 11114.0 1403.32   5
  -5   3  -6 10025.0 894.717   2
  -5   3  -7 5886.20 1033.40   5
  -5   3  -7 6061.67 705.359   2
  -5   3  -8 1230.35 342.378   2
  -5   3  -8 1232.96 433.213   5
  -5   3  -9 4469.26 645.703   2
  -5   3  -9 6125.55 1117.97   5
   5  -3  10 78.6590 200.409   3
  -5  -3 -10 180.538 85.2219   1
  -5   3 -10 2.97290 118.939   2
  -5   3 -10-132.971 310.216   5
  -5   3 -11-220.337 233.553   5
   5  -3  11-38.0367 213.711   3
  -5  -3 -11 48.6004 61.5395   1
  -5   3 -11 155.640 142.803   2
   5  -3  12 38.3845 153.693   3
  -5   3 -12 194.087 164.949   5
  -5   3 -13 1452.39 629.130   5
   5  -3  13 2131.07 656.399   3
  -5   3 -14-22.6213 258.175   5
   5  -3  14 266.855 299.965   3
   5  -3  15 1183.08 593.967   3
  -5   3 -15 292.780 83.1744   5
  -5   3 -16 87.8748 84.9718   5
   5  -3  16 24.2873 184.964   3
   5  -3  17 60.7752 353.895   3
  -5   3 -17-753.950 469.602   5
  -5   3 -18 473.506 379.048   5
   5  -3  18 705.759 321.883   3
   5  -3  19-267.673 368.472   3
  -5   3 -19 50.5702 122.148   5
  -5   3 -20-275.277 323.277   5
   5  -3  20-13.4072 135.070   3
   5  -3  21-659.459 722.670   3
  -5   3 -21-240.937 293.280   5
   5  -3  22 1369.59 905.487   3
   5  -3  23-98.1935 246.598   3
  -5  -4  23-321.091 526.566   3
   5   4 -23 103.178 151.953   5
  -5  -4  22-270.148 586.960   3
   5   4 -22 179.974 356.054   5
   5  -4 -21-217.510 217.108   1
   5   4 -21-190.307 257.901   5
   5   4 -20 465.394 302.017   5
   5  -4 -20 64.7968 58.2071   1
   5  -4 -19 612.268 352.296   1
   5   4 -19 1434.60 577.969   5
   5   4 -18 373.968 322.430   5
   5  -4 -18 613.971 371.840   1
   5  -4 -17 242.351 232.787   1
   5   4 -17 318.666 288.514   5
   5   4 -16 1846.77 644.881   5
   5  -4 -16 1070.19 448.480   1
   5  -4 -15 406.778 307.105   1
   5   4 -15 477.122 257.560   5
   5  -4 -14 22.0751 85.3470   1
   5   4 -14 162.150 198.847   5
   5  -4 -13-153.885 218.270   1
   5   4 -13-285.200 255.447   5
   5  -4 -12 1836.76 601.877   1
   5   4 -12 2008.50 630.158   5
   5  -4 -11 743.996 360.792   1
   5   4 -11 960.130 415.808   5
   5   4 -10 5792.18 1011.12   5
   5  -4 -10 5067.89 961.249   1
   5   4  -9 808.275 339.895   5
   5  -4  -9 1147.68 437.556   1
   5   4  -8 2017.58 545.745   5
  -5  -4   7 616.797 341.001   4
   5   4  -7 514.538 220.408   5
  -5  -4   6 313.381 252.298   4
   5   4  -6 458.915 275.603   5
  -5  -4   5 868.146 449.956   4
   5   4  -5 787.756 313.105   5
   5   4  -4 48562.4 2221.48   5
  -5  -4   4 53948.8 3385.42   4
  -5  -4   3 1107.43 537.073   4
   5   4  -3 1218.56 326.240   5
   5   4  -2 17335.2 1125.16   5
  -5  -4   2 17559.7 1872.85   4
   5  -4  -1 882.103 374.004   4
  -5  -4   1 490.981 175.765   4
   5   4  -1 528.167 165.338   5
  -5  -4   0 7652.30 1217.18   4
   5   4   0 7794.78 531.026   5
  -5   4   0 9803.09 1332.45   5
   5  -4   0 9214.38 1228.66   4
  -5  -4  -1 2588.48 652.707   4
   5  -4   1 2811.22 704.488   4
  -5   4  -1 4030.75 729.393   2
  -5   4  -1 3231.24 787.635   5
  -5   4  -2 42.1600 112.360   2
  -5  -4  -2-256.495 338.973   4
   5  -4   2 94.6870 100.631   4
  -5   4  -2 68.6983 119.503   5
   5  -4   3-100.882 139.707   4
  -5   4  -3-191.479 244.474   5
  -5   4  -4 7630.04 858.261   2
  -5   4  -4 7535.35 1237.61   5
   5  -4   4 6399.81 1099.28   4
   5  -4   5 2876.96 754.117   4
  -5   4  -5 2245.66 444.558   2
  -5   4  -5 2061.44 655.770   5
   5  -4   6 5111.89 1008.01   4
  -5   4  -6 4058.29 578.402   2
  -5   4  -6 4347.93 955.620   5
  -5   4  -7 250.397 165.616   5
  -5   4  -8 717.013 494.306   5
  -5   4  -9 1533.12 561.028   5
  -5   4 -10 2609.56 772.243   5
  -5   4 -11 1476.16 623.102   5
  -5   4 -12-21.5111 364.064   5
  -5   4 -13-98.6775 195.070   5
  -5   4 -14 23.9087 209.162   5
  -5   4 -15 76.7072 128.869   5
  -5   4 -16-145.072 302.690   5
  -5   4 -17 700.444 444.913   5
  -5   4 -18 1745.63 732.232   5
  -5   4 -19 806.806 627.146   5
   5   5 -21-390.273 375.860   5
   5   5 -20-9.42082 234.848   5
   5   5 -19 833.025 522.596   5
   5   5 -18-288.794 389.473   5
   5   5 -17-30.0721 106.443   5
   5  -5 -17-102.087 186.588   1
   5   5 -16-254.371 332.588   5
   5  -5 -16-22.5925 149.481   1
   5   5 -15 133.177 87.9709   5
   5  -5 -15-146.764 227.764   1
   5   5 -14 610.797 411.814   5
   5   5 -13 805.721 413.299   5
   5   5 -12 128.952 162.212   5
  -5  -5  11 25.4288 103.766   4
   5   5 -11 111.957 67.8228   5
   5   5 -10 975.154 431.065   5
  -5  -5  10 225.513 185.126   4
  -5  -5   9-57.9218 210.888   4
   5   5  -9 366.470 345.678   5
  -5  -5   8 3009.46 911.856   4
   5   5  -8 2347.44 629.922   5
  -5  -5   7 2660.09 809.151   4
   5   5  -7 2300.64 616.231   5
  -5  -5   6 84.2527 154.126   4
  -5  -5   5 2041.59 710.573   4
  -5  -5   4 4650.24 1080.71   4
  -5  -5   3 6242.88 1286.86   4
  -5   5   3 6071.17 1147.59   5
  -5  -5   2 782.816 461.602   4
  -5   5   2 2701.46 737.412   5
  -5  -5   1 3928.83 986.865   4
  -5   5   1 5000.10 1044.59   5
   5  -5  -1 3543.48 874.096   4
   5  -5   0 5081.76 1043.85   4
  -5   5   0 4272.60 974.909   5
  -5  -5   0 4451.65 1054.73   4
  -5  -5  -1 308.763 172.519   4
   5  -5   1 349.985 314.463   4
  -5   5  -1-8.66824 231.547   5
   5  -5   2 1430.50 518.224   4
  -5   5  -2 1582.98 633.630   5
   5  -5   3 368.868 238.913   4
  -5   5  -3 359.237 126.995   5
   5  -5   4 251.745 433.450   4
  -5   5  -4 57.2104 207.875   5
   5  -5   5 319.969 373.373   4
  -5   5  -5 117.247 105.503   5
   5  -5   6 377.029 290.687   4
  -5   5  -6-59.0273 234.070   5
   5  -5   7 251.003 218.723   4
  -5   5  -7 216.275 297.404   5
   5  -5   8 126.187 220.827   4
  -5   5  -8 637.577 341.085   5
   5  -5   9 1786.21 687.874   4
  -5   5  -9 2927.96 905.444   5
   5  -5  10-100.174 281.150   4
  -5   5 -10 35.2567 171.158   5
   5  -5  11 540.854 434.527   4
  -5   5 -11 421.344 370.876   5
  -5   5 -12 839.453 548.601   5
  -5   5 -13-82.3469 321.014   5
  -5   5 -14-831.981 532.986   5
  -5   5 -15 15.0054 342.085   5
  -5   5 -16 367.720 337.682   5
  -5  -6  15 451.520 459.734   4
  -5  -6  14 190.771 433.631   4
  -5  -6  13 368.491 297.790   4
  -5  -6  12 356.289 280.638   4
  -5  -6  11-178.142 346.861   4
  -5  -6  10 447.725 488.840   4
  -5  -6   9-593.584 464.372   4
  -5  -6   8 60.2083 222.156   4
  -5  -6   7 394.744 423.996   4
  -5  -6   6 348.688 363.411   4
  -5  -6   5 1480.87 680.299   4
  -5  -6   4 1077.78 496.220   4
  -5  -6   3-36.8205 135.697   4
  -5  -6   2-242.947 324.164   4
  -5  -6   1 633.297 451.205   4
  -5  -6   0 2869.81 966.899   4
   5  -6   1 342.431 314.638   4
  -5   6  -2-27.0091 100.982   5
   5  -6   2 259.013 303.823   4
   5  -6   3 472.984 490.750   4
  -5   6  -3 624.943 424.232   5
   5  -6   4 2399.23 809.506   4
  -5   6  -4 3262.83 987.314   5
   5  -6   5 1821.67 720.782   4
  -5   6  -5 2505.96 854.767   5
   5  -6   6 593.042 430.273   4
  -5   6  -6 1152.06 625.765   5
  -5   6  -7-167.495 185.435   5
   5  -6   7-18.2233 124.099   4
  -5   6  -8-237.135 364.311   5
  -5   6  -9 841.490 488.905   5
  -5   6 -10 258.808 192.477   5
  -5   6 -11 68.0485 95.2634   5
  -5   6 -12 146.207 74.9036   5
  -5   6 -13-28.8580 157.214   5
  -5  -7   3-608.489 484.292   4
  -5  -7   2 71.8490 195.693   4
   6   0 -28 305.243 422.485   5
   6   0 -27 638.211 465.813   5
   6   0 -26-19.8202 236.263   5
   6   0 -25 137.754 299.295   5
   6   0 -24 93.2632 168.789   5
   6   0 -23-229.438 214.216   5
   6   0 -22-53.4419 165.477   5
   6   0 -21-191.595 208.271   5
   6   0 -20 3926.48 950.899   5
   6   0 -19 609.558 519.966   5
   6   0 -18 3032.33 805.473   5
   6   0 -17 498.878 434.473   5
   6   0 -16 2825.61 743.192   5
   6   0 -15-49.8311 119.067   5
   6   0 -14 8085.35 1130.92   5
   6   0 -13 8.10768 120.453   5
   6   0 -12 13330.3 1334.01   5
   6   0 -11-59.8553 111.071   5
   6   0 -10-60.0146 139.142   5
   6   0  -9-24.4886 66.4233   5
   6   0  -8 25398.7 1573.51   5
   6   0  -7-29.9505 116.135   5
  -6   0   6 3898.88 485.880   3
  -6   0   5-46.0097 89.9033   3
  -6   0   4 10636.4 690.247   3
  -6   0   3-78.2478 110.208   2
  -6   0   3-36.9832 30.0482   3
   6   0  -3 118.450 109.771   3
  -6   0   2 277.225 152.544   2
   6   0  -2 382.606 102.120   3
  -6   0   1 1.05169 30.5105   4
   6   0  -1 40.7540 55.4421   1
  -6   0   1 43.9527 107.856   2
   6   0   0 72363.2 1846.75   1
  -6   0   0 70547.0 2193.08   2
   6   0   0 68839.0 1484.67   4
  -6   0   0 70364.2 1784.89   1
  -6   0  -1 195.508 144.129   2
   6   0   1-1.21608 36.7202   4
  -6   0  -1 60.7700 55.4215   1
  -6   0  -2 39.5507 48.2382   1
  -6   0  -2 8.20748 75.0444   2
  -6   0  -3 150.867 132.289   2
  -6   0  -4 8314.95 834.274   5
  -6   0  -4 8130.47 863.544   2
  -6   0  -5-45.1309 93.7417   2
  -6   0  -5-62.8472 92.1768   5
  -6   0  -6 20691.9 1468.88   5
  -6   0  -6 18731.3 1446.76   2
  -6   0  -7 34.1460 131.822   2
  -6   0  -7-83.9578 204.365   5
  -6   0  -8 89.8466 162.077   2
  -6   0  -8-142.198 155.782   5
  -6   0  -9 23.4381 91.0865   5
  -6   0  -9-60.0498 133.241   2
  -6   0 -10 333.027 263.838   2
  -6   0 -10 92.4461 172.894   5
  -6   0 -11 18.8897 156.254   5
  -6   0 -12 5366.33 927.972   5
  -6   0 -13-69.8897 334.711   5
  -6   0 -14 1.53677 137.703   5
  -6   0 -15 470.840 348.366   5
  -6   0 -16 30788.8 2547.71   5
  -6   0 -17 1667.77 710.930   5
  -6   0 -18 765.044 515.854   5
  -6   0 -19 573.900 461.563   5
  -6   0 -20 2879.61 835.574   5
  -6   0 -21 155.837 251.426   5
  -6   0 -22 65.9161 294.896   5
  -6   0 -23 404.750 477.076   5
  -6   0 -24 111.054 84.4117   5
  -6   0 -25-126.420 206.894   5
   6  -1 -29 177.790 279.383   5
   6  -1 -28-138.638 286.105   5
   6   1 -27-93.7025 199.244   5
   6  -1 -27-195.176 309.903   5
   6  -1 -26-38.3157 67.0205   5
   6   1 -26-102.178 206.465   5
   6   1 -25-194.234 250.607   5
   6  -1 -25 136.897 246.041   5
  -6  -1  25 525.684 642.377   3
   6   1 -24 404.186 390.825   5
  -6  -1  24 1405.71 855.699   3
   6  -1 -24 220.473 371.154   5
   6   1 -23 2700.07 873.471   5
  -6  -1  23 4573.12 1228.61   3
   6  -1 -23 2050.43 716.263   5
  -6  -1  22 2033.90 902.475   3
   6   1 -22 2525.27 874.484   5
   6  -1 -22 1746.27 661.618   5
   6   1 -21 5559.41 1229.66   5
   6  -1 -21 6581.13 1232.67   5
  -6  -1  21 8448.29 1636.57   3
   6   1 -20 3158.48 909.558   5
  -6  -1  20 3011.22 985.027   3
   6  -1 -20 2070.72 680.442   5
  -6  -1  19 337.575 590.400   3
   6   1 -19 24.7613 199.087   5
   6  -1 -19-59.6904 202.879   5
   6   1 -18-289.127 360.474   5
   6  -1 -18 464.556 319.658   5
  -6  -1  18 819.035 353.648   3
   6   1 -17 1019.73 401.426   5
  -6  -1  17 1386.42 602.431   3
   6  -1 -17 1381.71 476.761   5
   6  -1 -16 1391.21 465.929   5
  -6  -1  16 1253.84 504.372   3
   6   1 -16 820.061 455.927   5
   6   1 -15 837.532 419.870   5
  -6  -1  15 888.096 450.237   3
   6  -1 -15 1128.17 422.107   5
   6   1 -14 535.624 321.325   5
  -6  -1  14 1344.36 506.461   3
   6  -1 -14 1307.83 459.694   5
   6   1 -13 717.680 395.642   5
   6  -1 -13 602.667 320.052   5
  -6  -1  13 164.605 205.635   3
  -6  -1  12 22097.7 1730.85   3
   6  -1 -12 22396.2 1739.59   5
   6   1 -12 20276.8 1747.59   5
  -6  -1  11 87987.4 3320.37   3
   6   1 -11 88180.3 3513.21   5
   6  -1 -11 86659.3 3356.21   5
   6   1 -10 3562.98 661.893   5
  -6  -1  10 3223.87 614.403   3
  -6  -1   9 427.898 229.189   3
   6   1  -9 660.328 299.892   5
  -6  -1   8 164.021 175.862   3
   6   1  -8 406.507 202.626   5
   6   1  -7 104532. 3110.14   5
  -6  -1   7 113982. 3352.56   3
  -6  -1   6 27738.1 1618.65   3
   6   1  -6 29170.6 1551.67   5
  -6  -1   5 14964.1 950.197   2
  -6  -1   5 16283.7 1181.19   3
   6   1  -5 15116.1 1052.14   5
  -6  -1   4 28691.1 1523.63   5
   6   1  -4 29028.2 1401.94   5
  -6  -1   4 28586.1 1293.73   2
   6   1  -3 48815.4 1872.84   2
  -6  -1   3 48217.7 1850.52   5
  -6  -1   3 50846.4 1713.64   2
  -6  -1   2 141220. 3203.33   4
  -6  -1   2 148018. 2975.43   5
  -6  -1   2 152685. 3029.74   2
  -6   1   2 147676. 1957.85   4
   6   1  -2 149158. 3344.07   2
  -6   1   1 8525.42 822.284   2
  -6  -1   1 8923.37 765.035   2
  -6  -1   1 7950.61 742.102   4
  -6   1   0 307523. 4893.25   2
  -6  -1   0 307995. 4725.28   2
  -6  -1   0 313240. 4688.09   4
  -6  -1  -1 62871.0 2261.06   2
  -6   1  -1 62390.4 2200.76   2
  -6  -1  -1 62855.8 2129.80   4
   6  -1   2 2082.20 249.783   3
  -6   1  -2 1793.64 369.970   2
  -6  -1  -2 1818.10 399.920   2
   6  -1   3 24497.2 995.466   3
  -6  -1  -3 22597.5 1098.86   5
  -6  -1  -3 23042.3 1520.35   2
  -6   1  -3 22392.4 1339.73   2
  -6  -1  -4 8154.55 704.271   5
  -6  -1  -4 6225.71 838.094   2
   6  -1   4 7628.26 615.077   3
  -6   1  -4 7483.46 786.087   2
  -6   1  -4 8164.40 947.231   5
  -6  -1  -5 10704.8 858.536   5
  -6   1  -5 11757.9 1023.09   2
  -6   1  -5 10875.2 1117.59   5
  -6  -1  -5 12481.6 1227.28   2
  -6   1  -6 4527.47 675.724   2
  -6   1  -6 3982.41 677.655   5
  -6  -1  -6 4682.40 606.220   5
  -6  -1  -6 3126.30 609.928   2
  -6  -1  -7 12508.9 1039.27   5
  -6   1  -7 12340.5 1279.67   5
  -6  -1  -7 11095.0 1252.12   2
  -6   1  -7 12928.1 1157.03   2
  -6   1  -8 240.947 107.222   2
  -6   1  -8 203.579 94.3918   5
  -6  -1  -8 256.802 122.758   5
  -6   1  -9 347.507 142.045   2
  -6   1  -9 600.561 280.294   5
  -6  -1  -9 221.019 113.634   5
  -6   1 -10 366.023 224.718   5
  -6  -1 -10 330.596 192.906   5
  -6   1 -10 209.608 167.530   2
  -6   1 -11 88.9642 113.245   2
  -6   1 -11-16.7576 155.102   5
  -6  -1 -11 53.5457 149.987   5
  -6  -1 -12 807.669 373.921   5
  -6   1 -12 1099.65 457.313   5
  -6   1 -13 188.246 265.374   5
  -6  -1 -13 425.776 209.721   5
  -6  -1 -14 20341.5 1822.44   5
  -6   1 -14 22084.5 2142.03   5
  -6   1 -15 28272.3 2472.64   5
  -6  -1 -15 26408.2 2153.03   5
  -6   1 -16 1193.32 550.828   5
  -6  -1 -16 1614.63 556.364   5
  -6   1 -17-42.6783 149.503   5
  -6  -1 -17-161.176 230.596   5
  -6   1 -18 4448.94 1078.80   5
  -6  -1 -18 3547.15 859.418   5
  -6   1 -19 626.526 423.318   5
  -6  -1 -19-86.9781 99.1515   5
  -6  -1 -20 794.036 414.695   5
  -6   1 -20 308.670 349.792   5
  -6  -1 -21 397.758 311.654   5
  -6   1 -21 600.710 452.821   5
  -6  -1 -22 251.597 263.310   5
   6  -1  22 1224.47 895.166   3
  -6   1 -22 310.043 329.053   5
  -6   1 -23 421.421 362.700   5
   6  -1  23 1831.34 1137.84   3
  -6   1 -24 455.614 493.881   5
   6  -1  24 587.788 693.782   3
   6  -1  25 655.428 896.037   3
   6  -2 -28-53.0816 149.905   5
   6  -2 -27 375.960 331.665   5
   6   2 -26-102.577 270.173   5
   6  -2 -26-397.425 442.776   5
   6   2 -25-73.9631 187.481   5
   6  -2 -25 388.503 389.615   5
   6  -2 -24 627.744 432.028   5
   6   2 -24 594.661 413.817   5
  -6  -2  24 1562.38 709.131   3
   6  -2 -23 164.591 180.911   5
  -6  -2  23 169.191 244.883   3
   6   2 -23 443.377 428.200   5
  -6  -2  22 401.965 364.844   3
   6   2 -22 641.087 502.391   5
   6  -2 -22 138.380 130.836   5
  -6  -2  21 681.651 588.622   3
   6  -2 -21 1291.86 509.252   5
   6   2 -21 132.298 158.448   5
   6  -2 -20 136.536 274.159   5
  -6  -2  20-39.9351 148.241   3
   6   2 -20 384.829 408.295   5
  -6  -2  19 5804.35 1205.57   3
   6   2 -19 5303.85 1155.43   5
   6   2 -18-86.9652 243.005   5
  -6  -2  18 118.431 211.443   3
  -6  -2  17 11541.5 1605.37   3
   6   2 -17 10239.7 1531.48   5
   6   2 -16 1313.77 579.618   5
  -6  -2  16 2379.01 746.135   3
   6   2 -15 5861.67 1091.16   5
  -6  -2  15 5980.62 1028.00   3
  -6  -2  14 1764.12 579.121   3
   6   2 -14 1307.10 471.172   5
   6   2 -13 316.079 66.2881   5
  -6  -2  13 410.487 170.525   3
   6   2 -12 28351.8 2148.98   5
  -6  -2  12 25682.8 2091.54   3
   6   2 -11 51361.8 2763.67   5
  -6  -2  11 49535.2 2800.94   3
  -6  -2  10 34941.5 2331.66   3
   6   2 -10 35409.8 2218.65   5
   6  -2  -9 2690.63 634.230   1
  -6  -2   9 2891.51 639.944   3
   6   2  -9 2717.29 580.062   5
  -6  -2   9 2438.35 347.698   2
   6   2  -8 98.6370 86.5983   5
   6  -2  -8 92.1957 199.252   1
  -6  -2   8 28.4745 49.7494   2
   6   2  -7 10134.9 1021.98   5
  -6  -2   7 8527.47 585.654   2
  -6  -2   6 1932.40 287.834   2
   6   2  -6 1991.46 431.293   5
   6   2  -5 92570.5 2776.96   5
  -6  -2   5 91107.1 2070.02   2
   6   2  -4 72335.4 2239.37   5
   6   2  -4 69604.4 2077.50   2
  -6  -2   4 72550.3 1997.45   2
  -6  -2   4 67859.1 2385.65   5
  -6  -2   3 12481.2 1202.83   4
   6   2  -3 13372.8 879.712   5
  -6   2   3 11515.5 963.692   4
  -6  -2   3 12354.7 876.843   2
  -6  -2   3 12679.9 943.692   5
   6   2  -3 13165.0 955.964   2
   6   2  -2 36126.9 1325.58   5
  -6  -2   2 30983.8 1310.69   5
  -6  -2   2 32996.3 1546.87   2
  -6  -2   2 34492.1 1957.98   4
  -6   2   2 31675.6 1536.66   4
  -6  -2   1 904.165 191.714   5
  -6  -2   1 1065.95 320.337   4
   6  -2  -1 1053.91 243.758   4
  -6  -2   1 601.878 189.996   2
   6  -2   0 7088.22 665.950   4
  -6   2   0 7495.64 848.345   2
  -6  -2   0 6797.92 793.560   2
  -6  -2   0 6858.40 433.268   5
  -6  -2   0 6652.90 858.031   4
  -6  -2  -1-84.3839 53.4369   4
   6  -2   1-6.13984 100.831   4
  -6   2  -1 41.7270 80.2427   2
  -6   2  -1 119.899 99.9861   3
  -6  -2  -1-78.0828 153.011   2
  -6   2  -2 39846.2 1850.49   2
  -6  -2  -2 43380.6 2232.76   2
  -6   2  -2 34562.2 1473.95   3
  -6  -2  -2 41045.9 2189.15   4
   6   2   2 39928.4 938.399   1
  -6  -2  -3 13953.1 1317.60   2
  -6   2  -3 12474.1 908.128   3
  -6   2  -3 14676.1 1400.26   5
  -6   2  -3 15233.5 1132.73   2
  -6  -2  -4 64937.6 1288.82   5
  -6   2  -4 73344.7 3218.32   5
  -6   2  -4 68799.8 2409.22   2
  -6   2  -5 23108.2 1430.71   2
   6  -2   5 26424.9 1553.20   3
  -6  -2  -5 22880.5 923.291   5
  -6   2  -5 25733.9 1926.70   5
  -6   2  -6 2278.23 621.664   5
  -6  -2  -6 2356.68 342.919   5
  -6   2  -6 2047.04 437.400   2
   6  -2   6 2091.98 449.476   3
   6  -2   7 4046.06 647.057   3
  -6  -2  -7 3589.27 470.429   5
  -6   2  -7 3809.28 629.225   2
  -6  -2  -7 3668.52 340.266   1
  -6   2  -7 3767.05 751.741   5
  -6  -2  -8 4234.45 549.705   5
   6  -2   8 4478.17 717.881   3
  -6   2  -8 3863.46 623.495   2
  -6  -2  -8 3515.44 364.415   1
  -6   2  -8 4470.84 847.421   5
   6  -2   9 1745.30 472.463   3
  -6   2  -9 1769.16 438.597   2
  -6  -2  -9 1402.09 348.221   5
  -6   2  -9 1107.18 348.159   5
  -6   2 -10 5464.70 1024.85   5
   6  -2  10 5677.49 893.961   3
  -6   2 -10 5521.76 818.698   2
  -6  -2 -10 5228.72 715.213   5
  -6   2 -11 9928.67 1434.80   5
  -6   2 -11 8120.92 1036.55   2
   6  -2  11 10427.6 1286.45   3
  -6  -2 -11 8594.17 956.542   5
  -6   2 -12 6057.54 1113.23   5
  -6  -2 -12 5171.85 775.760   5
  -6   2 -12 6259.63 957.149   2
   6  -2  12 6250.32 1042.44   3
  -6  -2 -13 444.141 263.931   5
   6  -2  13 498.234 349.880   3
  -6   2 -13-171.590 349.202   5
  -6  -2 -14 193.546 165.908   5
   6  -2  14 627.233 435.894   3
  -6   2 -14 453.119 322.929   5
  -6  -2 -15 55.7328 133.610   5
   6  -2  15-137.950 330.145   3
  -6   2 -15-79.7082 122.102   5
  -6   2 -16 2383.26 770.883   5
  -6  -2 -16 3460.75 765.149   5
   6  -2  16 3365.02 1013.64   3
   6  -2  17 6422.71 1361.27   3
  -6   2 -17 3617.29 1006.16   5
   6  -2  18 903.796 634.613   3
  -6   2 -18-219.800 312.578   5
   6  -2  19 3114.85 1218.82   3
  -6   2 -19 1600.78 687.962   5
  -6   2 -20 218.064 242.006   5
   6  -2  20-503.544 554.506   3
  -6   2 -21-693.978 475.151   5
   6  -2  21-201.051 269.488   3
   6  -2  22-590.138 764.370   3
  -6   2 -22 1218.77 684.152   5
  -6   2 -23 996.571 547.709   5
   6  -2  23 2163.02 1187.09   3
   6  -2  24-508.014 656.293   3
  -6  -3  25-195.867 166.144   3
   6   3 -25 777.296 548.504   5
  -6  -3  24 327.644 406.123   3
   6   3 -24 325.914 343.265   5
   6   3 -23-59.4285 202.279   5
  -6  -3  23-91.5481 134.875   3
  -6  -3  22 647.122 436.689   3
   6   3 -22 270.861 366.575   5
   6   3 -21 497.952 412.422   5
  -6  -3  21 1251.48 588.116   3
   6   3 -20 291.483 272.849   5
  -6  -3  20 797.773 488.613   3
   6   3 -19 273.809 291.166   5
  -6  -3  19-40.6266 135.548   3
  -6  -3  18 4306.04 1057.16   3
   6   3 -18 2358.14 778.795   5
  -6  -3  17 2456.02 745.697   3
   6   3 -17 3288.78 904.216   5
   6  -3 -17 1768.67 595.884   1
   6  -3 -16 1186.05 517.814   1
  -6  -3  16 635.165 477.826   3
   6   3 -16 801.234 481.660   5
  -6  -3  15 72340.4 4065.39   3
   6   3 -15 79404.0 4125.77   5
   6  -3 -15 74368.7 3750.60   1
   6   3 -14 15751.3 1797.23   5
  -6  -3  14 16135.5 1879.38   3
   6  -3 -14 12596.0 1528.56   1
   6  -3 -13 140.710 260.339   1
   6   3 -13 372.229 263.935   5
   6  -3 -12 7124.55 1143.16   1
   6   3 -12 6794.21 1122.34   5
   6   3 -11 2152.65 580.503   5
   6  -3 -11 2399.96 634.231   1
   6   3 -10-83.4198 241.407   5
   6  -3 -10-147.903 178.612   1
   6  -3  -9 1803.10 523.782   1
   6   3  -9 2637.14 595.820   5
   6   3  -8 6193.16 884.053   5
   6  -3  -8 5950.86 958.020   1
   6   3  -7 19620.7 1522.85   5
   6  -3  -7 18722.1 1688.76   1
   6   3  -6 566.878 277.057   5
   6  -3  -6 1224.18 456.598   1
   6   3  -5 2499.71 363.769   2
  -6  -3   5 1894.84 538.646   4
   6   3  -5 3488.49 573.626   5
  -6  -3   4 4342.10 824.044   4
   6   3  -4 4821.56 620.072   5
   6   3  -4 4356.46 527.532   2
   6   3  -3 18759.1 1127.01   5
  -6  -3   3 19817.1 1769.19   4
  -6  -3   2 29.5021 39.0619   5
   6   3  -2-7.66471 27.6374   5
  -6  -3   2-140.832 297.322   4
   6  -3  -1 1214.52 335.624   4
  -6  -3   1 816.558 433.404   4
   6   3  -1 1385.79 222.946   5
  -6  -3   0 10994.3 1317.51   4
   6  -3   0 11683.8 1108.37   4
   6   3   1 15253.8 1099.57   1
  -6   3  -1 20067.1 1490.21   2
  -6  -3  -1 20887.4 1789.13   4
   6  -3   1 19525.2 1469.12   4
  -6  -3  -2 4999.50 865.270   4
  -6   3  -2 6251.70 803.616   2
   6   3   2 5053.95 583.729   1
  -6   3  -2 5500.95 904.274   5
   6  -3   2 5110.95 773.593   4
  -6   3  -3 4515.84 848.576   5
  -6   3  -3 4228.93 633.343   2
   6  -3   3 5106.56 792.569   4
   6  -3   4 887.524 358.508   4
  -6   3  -4 916.929 303.625   2
  -6   3  -4 477.520 221.332   5
  -6   3  -5 3553.74 565.066   2
  -6   3  -5 3272.47 780.999   5
  -6   3  -6 190.371 123.805   5
  -6   3  -6-41.8045 36.1820   2
  -6   3  -7 9836.62 955.717   2
  -6   3  -7 10678.4 1446.05   5
  -6   3  -8 1609.84 395.883   2
  -6   3  -8 1587.90 534.588   5
  -6   3  -9 753.593 262.247   2
  -6   3  -9 465.517 212.807   5
  -6   3 -10-1.40814 111.555   2
  -6   3 -10-509.792 356.557   5
   6  -3  10-263.105 349.093   3
   6  -3  11-87.0463 300.035   3
  -6   3 -11 167.419 163.942   2
  -6   3 -11 113.892 122.195   5
  -6   3 -12 474.244 356.601   5
  -6   3 -12 446.576 280.746   2
   6  -3  12 571.963 359.270   3
   6  -3  13-23.2553 278.999   3
  -6   3 -13 11.4774 166.975   5
  -6   3 -14 140.471 227.677   5
   6  -3  14 7.41261 204.992   3
  -6   3 -15 516.493 321.733   5
   6  -3  15 1000.11 491.034   3
   6  -3  16 2396.91 793.309   3
  -6   3 -16 2164.53 762.175   5
   6  -3  17 95.4239 306.960   3
  -6   3 -17 6.85735 94.9855   5
   6  -3  18 946.574 552.989   3
  -6   3 -18 145.388 323.783   5
   6  -3  19 34.8607 344.561   3
  -6   3 -19 354.522 336.488   5
   6  -3  20 174.888 574.912   3
  -6   3 -20 154.254 221.402   5
  -6   3 -21 743.785 315.988   5
  -6  -4  23 420.927 387.957   3
   6   4 -23 382.847 378.623   5
   6   4 -22 318.374 287.436   5
   6  -4 -22 305.218 288.518   1
   6  -4 -21 201.354 255.003   1
   6   4 -21 627.374 398.995   5
   6   4 -20-46.3123 194.116   5
   6  -4 -20 176.766 152.780   1
   6   4 -19 61.2074 185.202   5
   6  -4 -19 131.611 245.657   1
   6  -4 -18 55.2887 174.746   1
   6   4 -18 96.6022 122.132   5
   6  -4 -17 2989.60 796.870   1
   6   4 -17 3618.60 971.253   5
   6   4 -16 1913.56 702.017   5
   6  -4 -16 1277.90 523.145   1
   6   4 -15 11930.7 1671.71   5
   6  -4 -15 9278.64 1380.25   1
   6  -4 -14 533.823 327.117   1
   6   4 -14 1044.08 460.644   5
   6  -4 -13 1045.22 437.668   1
   6   4 -13 900.587 472.483   5
   6  -4 -12 759.103 433.033   1
   6   4 -12 237.961 141.810   5
   6  -4 -11 9248.18 1357.31   1
   6   4 -11 11099.0 1431.27   5
   6   4 -10 16060.4 1659.26   5
   6  -4 -10 15369.6 1724.14   1
   6   4  -9 9428.81 1223.08   5
   6  -4  -9 7325.41 1189.60   1
  -6  -4   8 3029.08 842.504   4
   6   4  -8 3900.64 746.127   5
  -6  -4   7 501.987 353.764   4
   6   4  -7 337.816 239.176   5
  -6  -4   6 2696.26 765.281   4
   6   4  -6 3887.33 740.638   5
  -6  -4   5 254.718 224.579   4
   6   4  -5 696.729 235.905   5
   6   4  -4 17278.0 1283.28   5
  -6  -4   4 19010.3 2036.80   4
  -6  -4   3 4357.55 966.527   4
   6   4  -3 3802.54 554.479   5
  -6  -4   2 948.449 470.121   4
   6   4  -2 29.7271 59.2715   5
  -6  -4   1 3462.54 825.203   4
   6   4  -1 2477.62 323.513   5
   6  -4  -1 2498.40 611.079   4
   6  -4   0 2367.45 621.415   4
  -6  -4   0 1743.65 590.649   4
  -6  -4  -1 35.1200 99.1293   4
   6  -4   1 46.8305 51.2517   4
  -6   4  -1 38.1858 74.6775   2
  -6   4  -1 46.2938 248.211   5
   6  -4   2 1039.88 437.628   4
  -6   4  -2 932.395 350.098   2
  -6   4  -2 1154.41 512.452   5
  -6  -4  -2 651.648 393.727   4
  -6   4  -3 5472.06 1074.41   5
  -6   4  -3 4981.50 764.107   2
   6  -4   3 6729.98 1065.64   4
   6  -4   4 1394.01 481.335   4
  -6   4  -4 1216.31 355.097   2
  -6   4  -4 1800.68 592.227   5
   6  -4   5 4194.57 913.378   4
  -6   4  -5 5462.43 731.822   2
  -6   4  -5 4939.78 1029.97   5
   6  -4   6 480.276 361.297   4
  -6   4  -6 258.882 150.726   2
  -6   4  -6 361.511 344.202   5
   6  -4   7 66.9434 96.9553   4
  -6   4  -7-189.976 283.858   5
  -6   4  -8 206.032 109.113   5
  -6   4  -9 92.3653 200.557   5
  -6   4 -10-15.7948 106.481   5
  -6   4 -11 5475.76 1227.10   5
  -6   4 -12-269.699 479.719   5
  -6   4 -13 42.5596 281.013   5
  -6   4 -14 29.6852 79.1324   5
  -6   4 -15 150.711 350.657   5
  -6   4 -16 606.345 394.879   5
  -6   4 -17 148.361 435.480   5
  -6   4 -18 73.6343 162.616   5
  -6   4 -19 153.044 283.647   5
   6   5 -21-202.938 278.303   5
   6   5 -20 92.2604 108.276   5
   6   5 -19-87.9355 185.436   5
   6  -5 -18 145.966 153.728   1
   6   5 -18 107.159 96.7156   5
   6   5 -17-153.845 203.256   5
   6  -5 -17 289.068 305.233   1
   6  -5 -16 692.203 415.961   1
   6   5 -16 451.274 391.403   5
   6   5 -15 425.084 320.637   5
   6  -5 -15-206.061 225.085   1
   6  -5 -14 298.597 94.1966   1
   6   5 -14 887.717 495.635   5
   6   5 -13 1027.65 501.228   5
   6   5 -12-38.1061 111.706   5
  -6  -5  11-50.1497 267.329   4
   6   5 -11 366.009 338.587   5
  -6  -5  10 685.324 412.182   4
   6   5 -10 1352.20 494.291   5
  -6  -5   9 794.859 538.884   4
   6   5  -9 135.760 174.800   5
  -6  -5   8 2130.50 724.017   4
  -6  -5   7 981.634 493.610   4
  -6  -5   6 3612.79 979.900   4
  -6  -5   5 3906.15 1029.94   4
  -6  -5   4-191.127 319.743   4
  -6  -5   3 12285.7 1781.56   4
  -6  -5   2 5105.67 1159.51   4
  -6   5   2 5538.43 1120.94   5
  -6  -5   1 988.473 500.439   4
  -6   5   1 2505.44 802.310   5
   6  -5   0 6123.58 1119.11   4
  -6  -5   0 6516.00 1240.63   4
  -6   5   0 8300.72 1408.12   5
  -6  -5  -1 2107.17 646.667   4
   6  -5   1 1474.21 543.785   4
  -6   5  -1 1683.08 631.875   5
   6  -5   2 451.276 342.387   4
  -6   5  -2 53.5946 97.5602   5
   6  -5   3-75.7233 177.521   4
  -6   5  -3-126.691 303.654   5
   6  -5   4 172.315 146.658   4
  -6   5  -4-290.191 418.950   5
   6  -5   5-62.3300 144.888   4
  -6   5  -5-137.400 126.186   5
   6  -5   6 35.4786 146.085   4
  -6   5  -6 776.111 464.428   5
  -6   5  -7 3615.45 1026.45   5
   6  -5   7 2667.84 859.966   4
   6  -5   8-123.953 95.1342   4
  -6   5  -8 99.3261 144.708   5
   6  -5   9 747.557 397.474   4
  -6   5  -9 506.443 382.794   5
   6  -5  10-40.5135 325.688   4
  -6   5 -10-775.761 492.448   5
  -6   5 -11 161.713 221.996   5
  -6   5 -12-96.6706 185.140   5
  -6   5 -13 338.519 382.997   5
  -6   5 -14 252.655 385.043   5
  -6   5 -15 2828.64 1004.95   5
  -6   5 -16 1623.69 746.171   5
  -6  -6  15-238.857 410.274   4
  -6  -6  14 65.6727 276.238   4
  -6  -6  13-100.154 255.619   4
  -6  -6  12 218.432 250.503   4
  -6  -6  11-306.046 466.404   4
  -6  -6  10 548.870 554.750   4
  -6  -6   9 333.160 466.073   4
  -6  -6   8 270.250 460.157   4
  -6  -6   7 4.32111 146.086   4
  -6  -6   6 3.50015 251.023   4
  -6  -6   5 356.745 325.603   4
  -6  -6   4 667.737 477.845   4
  -6  -6   3-61.0505 95.1517   4
  -6  -6   2 313.011 297.836   4
  -6  -6   1 506.916 473.319   4
  -6  -6   0 1435.56 666.085   4
  -6   6  -1 517.214 379.985   5
   6  -6   1 845.288 526.353   4
   6  -6   2 414.982 319.558   4
  -6   6  -2-133.274 225.207   5
   6  -6   3 149.796 232.492   4
  -6   6  -3 757.846 455.436   5
   6  -6   4-6.07441 128.303   4
  -6   6  -4 122.186 264.555   5
  -6   6  -5 387.210 380.635   5
  -6   6  -6 25.1532 163.182   5
  -6   6  -7 433.393 409.240   5
  -6   6  -8-759.919 514.538   5
  -6   6  -9 1115.68 590.312   5
  -6   6 -10 350.199 496.172   5
  -6   6 -11 156.578 219.975   5
  -6   6 -12 792.546 565.447   5
   7   0 -28-149.986 318.315   5
  -7   0  27 597.632 668.461   3
   7   0 -27 467.422 493.865   5
   7   0 -26-91.9571 81.0721   5
   7   0 -25 253.356 388.974   5
   7   0 -24 111.104 220.065   5
   7   0 -23 1205.10 559.807   5
   7   0 -22 1223.51 592.728   5
   7   0 -21 2657.44 821.261   5
   7   0 -20 667.363 551.026   5
   7   0 -19 795.784 401.406   5
   7   0 -18 119.080 76.8657   5
   7   0 -17 3276.11 795.048   5
   7   0 -16-71.4272 177.853   5
   7   0 -15 739.982 367.164   5
   7   0 -14 29.5577 116.914   5
   7   0 -13 3117.88 665.048   5
   7   0 -12 0.84710 172.836   5
   7   0 -11 1092.33 370.039   5
   7   0 -10-109.514 172.038   5
   7   0  -9 4039.46 668.051   5
   7   0  -8-36.3239 110.474   5
  -7   0   7 11531.1 894.220   3
  -7   0   6 93.3574 155.370   3
  -7   0   5 8832.66 712.044   3
  -7   0   4-114.138 102.115   3
  -7   0   4-697.754 243.575   2
  -7   0   3 18194.6 1209.81   2
  -7   0   3 17311.4 830.912   3
   7   0  -3 18540.1 855.035   3
   7   0  -2-95.7879 96.1620   3
  -7   0   2-101.213 95.4372   2
   7   0  -2 13.3235 37.8324   1
  -7   0   1 49736.8 1257.65   4
   7   0  -1 50140.5 1641.40   1
  -7   0   1 51251.3 2019.16   2
   7   0   0-13.7104 45.1032   4
  -7   0   0 57.4498 88.0511   1
   7   0   0 0.44915 73.6395   1
  -7   0   0 73.8128 168.935   2
  -7   0  -1 6729.74 744.385   2
  -7   0  -1 7127.96 626.304   1
   7   0   1 7105.68 546.975   4
  -7   0  -2-35.2424 58.7707   2
  -7   0  -2-52.5028 84.1593   1
   7   0   2 17.0014 76.9594   4
  -7   0  -3 126079. 3430.74   2
  -7   0  -4 94.6574 125.351   2
  -7   0  -4 33.1487 110.498   5
  -7   0  -5 19946.8 1418.08   5
  -7   0  -5 19023.8 1445.73   2
  -7   0  -6-48.2535 112.257   2
  -7   0  -6-26.7561 83.5615   5
  -7   0  -7 10569.8 1198.87   2
  -7   0  -7 9638.68 1097.04   5
  -7   0  -8-111.281 143.838   5
  -7   0  -8-33.3862 111.508   2
  -7   0  -9 26225.1 1914.38   5
  -7   0  -9 26526.1 2009.07   2
  -7   0 -10 91.6739 76.1824   2
  -7   0 -10 40.3454 67.3948   5
  -7   0 -11 1978.17 538.061   5
  -7   0 -11 2052.77 617.939   2
  -7   0 -12 443.967 277.485   5
  -7   0 -13 702.226 433.514   5
  -7   0 -14 722.617 423.672   5
  -7   0 -15 2675.63 737.194   5
  -7   0 -16 377.397 378.270   5
  -7   0 -17 66017.7 3884.07   5
  -7   0 -18 114.536 398.259   5
  -7   0 -19 406.064 211.345   5
  -7   0 -20 23.7525 82.1582   5
  -7   0 -21 267.681 181.952   5
  -7   0 -22-113.114 251.162   5
  -7   0 -23-133.490 205.248   5
  -7   0 -24 123.973 165.583   5
  -7   0 -25 173.870 358.343   5
   7  -1 -29 67.3522 161.522   5
   7  -1 -28 21.3138 178.756   5
   7   1 -27 1241.17 663.958   5
   7  -1 -27 956.605 447.156   5
   7  -1 -26-19.4160 99.1946   5
   7   1 -26 455.427 431.970   5
   7   1 -25 127.794 213.416   5
  -7  -1  25 723.085 495.093   3
   7  -1 -25 208.797 204.508   5
   7   1 -24 828.990 512.968   5
   7  -1 -24 510.718 268.284   5
  -7  -1  24 1359.15 827.775   3
   7  -1 -23 3333.42 961.044   5
   7   1 -23 2830.63 884.674   5
  -7  -1  23 4852.45 1327.04   3
   7  -1 -22 3222.20 909.891   5
   7   1 -22 1491.90 660.169   5
  -7  -1  22 3235.19 1075.52   3
   7   1 -21 3278.03 963.267   5
   7  -1 -21 4725.23 1066.48   5
   7   1 -20 127.309 346.937   5
  -7  -1  20 800.615 550.866   3
   7  -1 -20 325.441 348.990   5
  -7  -1  19 13451.8 1803.86   3
   7  -1 -19 11439.2 1559.94   5
   7   1 -19 11785.8 1618.79   5
   7   1 -18 2595.67 751.018   5
   7  -1 -18 1305.64 582.808   5
  -7  -1  18 2628.71 777.878   3
   7  -1 -17 194.556 325.640   5
  -7  -1  17 468.253 452.883   3
   7   1 -17 714.663 378.960   5
   7   1 -16 2910.75 734.019   5
  -7  -1  16 3867.63 825.779   3
   7  -1 -16 2610.92 707.423   5
   7  -1 -15 1812.30 570.880   5
   7   1 -15 1164.73 425.017   5
  -7  -1  15 965.340 428.748   3
   7   1 -14 1609.62 551.061   5
   7  -1 -14 1760.15 544.745   5
  -7  -1  14 1386.64 496.302   3
  -7  -1  13 8992.86 1126.62   3
   7  -1 -13 8621.75 1168.13   5
   7   1 -13 8904.94 1197.26   5
   7   1 -12 3343.68 716.935   5
  -7  -1  12 5207.80 837.002   3
   7   1 -11 25115.1 1878.58   5
  -7  -1  11 24891.3 1780.60   3
  -7  -1  10 59102.8 2693.35   3
   7   1 -10 60146.1 2758.89   5
   7   1  -9 61920.2 2651.80   5
  -7  -1   9 61581.5 2668.81   3
   7   1  -8 483.419 219.742   5
  -7  -1   8 264.364 83.1826   3
   7   1  -7 67121.5 2565.23   5
  -7  -1   7 70318.4 2724.42   3
  -7  -1   6 319.864 156.887   2
  -7  -1   6 589.282 151.309   3
   7   1  -6 824.433 269.386   5
  -7  -1   5 19910.8 1182.27   2
   7   1  -5 16755.3 1170.31   5
  -7  -1   4 9701.32 814.748   2
  -7  -1   3 7560.23 717.584   2
  -7  -1   3 7460.28 766.336   5
  -7  -1   2 1296.41 311.498   4
  -7  -1   2 2034.40 384.321   5
  -7  -1   2 2029.77 375.364   2
  -7   1   2 1428.40 321.192   2
  -7   1   1 103860. 3077.31   2
  -7  -1   1 103796. 2845.52   2
  -7  -1   1 104618. 2812.73   4
  -7   1   0 112893. 3117.35   2
  -7  -1   0 110916. 2887.62   4
  -7  -1   0 109346. 2984.81   2
  -7   1  -1 12273.3 1028.56   2
  -7  -1  -1 13472.5 1095.04   2
  -7  -1  -1 12607.1 987.872   4
  -7  -1  -2 2349.94 458.986   2
   7  -1   2 2217.67 257.881   3
  -7   1  -2 2443.82 460.162   2
  -7  -1  -3 2503.56 510.435   2
   7  -1   3 1838.21 282.516   3
  -7   1  -3 2093.66 439.254   2
  -7  -1  -3 1721.39 334.784   5
  -7   1  -4 7054.01 823.394   2
  -7  -1  -4 7031.91 701.807   5
   7  -1   4 6726.79 585.209   3
  -7  -1  -4 7176.56 910.391   2
  -7   1  -4 6542.38 882.548   5
  -7   1  -5 8342.53 910.916   2
  -7   1  -5 9533.65 1093.74   5
  -7  -1  -5 9251.27 842.290   5
  -7  -1  -5 10046.2 1136.04   2
  -7   1  -6 10338.8 1174.98   5
  -7  -1  -6 10245.1 1199.46   2
  -7   1  -6 8730.98 977.440   2
  -7  -1  -6 10835.8 956.756   5
  -7   1  -7 54449.6 2770.86   5
  -7  -1  -7 52505.9 2235.32   5
  -7  -1  -7 56861.1 2966.58   2
  -7   1  -7 54464.7 2499.09   2
  -7  -1  -8 19375.1 1412.50   5
  -7   1  -8 18986.8 1689.07   5
  -7  -1  -8 20100.7 1800.90   2
  -7   1  -8 18562.6 1529.25   2
  -7   1  -9-105.615 206.620   5
  -7  -1  -9 133.822 104.484   5
  -7   1  -9 193.112 176.430   2
  -7   1 -10 4429.40 854.757   5
  -7  -1 -10 4638.22 750.582   5
  -7   1 -10 4395.40 797.576   2
  -7   1 -11 4685.22 925.469   5
  -7  -1 -11 5623.02 865.579   5
  -7   1 -11 5872.07 962.372   2
  -7   1 -12 10870.0 1436.21   5
  -7   1 -12 7925.90 1169.37   2
  -7  -1 -12 8710.14 1118.52   5
  -7  -1 -13 2467.75 680.141   5
  -7   1 -13 2709.49 744.713   5
  -7  -1 -14 21797.2 1898.48   5
  -7   1 -14 22248.8 2171.75   5
  -7  -1 -15 17319.7 1765.06   5
  -7   1 -15 18325.5 2024.05   5
  -7  -1 -16-56.2303 141.533   5
  -7   1 -16 333.027 419.620   5
  -7   1 -17 332.803 186.376   5
  -7  -1 -17 856.574 424.173   5
  -7   1 -18 27.5242 112.257   5
  -7  -1 -18 206.243 247.052   5
  -7  -1 -19-142.870 203.141   5
  -7   1 -19-157.283 241.873   5
  -7   1 -20 375.473 401.389   5
  -7  -1 -20 352.246 255.402   5
  -7  -1 -21 1341.31 545.990   5
  -7   1 -21 2519.90 889.428   5
  -7   1 -22 372.279 241.852   5
   7  -1  22 1758.32 949.095   3
  -7   1 -23 306.097 338.901   5
   7  -1  23 566.861 845.087   3
   7  -1  24 1235.17 1117.34   3
  -7   1 -24-149.337 260.709   5
   7   2 -26-187.216 254.175   5
  -7  -2  26 1069.52 764.166   3
  -7  -2  25-533.857 513.834   3
   7   2 -25-153.629 268.589   5
  -7  -2  24-119.566 263.536   3
   7   2 -24-421.666 358.955   5
   7   2 -23 342.603 284.796   5
  -7  -2  23 267.967 410.811   3
   7   2 -22 1286.34 598.871   5
  -7  -2  22 3184.51 993.677   3
  -7  -2  21 450.270 327.433   3
   7   2 -21 38.9333 113.718   5
   7   2 -20 1505.58 562.659   5
  -7  -2  20 1329.04 613.310   3
  -7  -2  19 1554.24 586.693   3
   7   2 -19 601.042 410.137   5
  -7  -2  18 400.849 379.756   3
   7   2 -18 209.490 307.181   5
  -7  -2  17 51622.3 3303.50   3
   7   2 -17 50353.1 3370.44   5
   7   2 -16 21192.2 2125.90   5
  -7  -2  16 22318.7 2139.49   3
  -7  -2  15 10559.9 1446.28   3
   7   2 -15 12240.9 1576.69   5
   7   2 -14 14094.5 1628.95   5
  -7  -2  14 13171.0 1548.21   3
  -7  -2  13 2670.44 743.268   3
   7   2 -13 1369.73 517.179   5
  -7  -2  12 2749.30 708.654   3
   7   2 -12 1823.12 546.129   5
   7   2 -11 33239.7 2245.44   5
  -7  -2  11 31972.7 2292.46   3
  -7  -2  10 21331.9 1196.56   2
  -7  -2  10 23633.8 1915.55   3
   7   2 -10 22848.5 1801.38   5
  -7  -2   9 13550.5 896.941   2
   7   2  -9 13981.1 1335.30   5
  -7  -2   9 15210.8 1485.76   3
   7  -2  -9 15428.2 1450.92   1
   7   2  -8 5336.64 786.808   5
  -7  -2   8 4961.61 516.397   2
   7   2  -7 13253.4 1170.34   5
  -7  -2   7 10410.6 743.343   2
   7   2  -6 44647.1 2025.60   5
  -7  -2   6 42212.4 1504.75   2
  -7  -2   5-104.287 97.6833   2
   7   2  -5-41.1357 107.154   2
   7   2  -5 105.183 117.698   5
   7   2  -4 88563.4 2617.43   2
   7   2  -4 93442.0 2570.30   5
  -7  -2   4 91547.6 2448.10   2
  -7  -2   3 107974. 3608.85   4
  -7  -2   3 103466. 2780.48   5
  -7  -2   3 113328. 2853.27   2
   7   2  -3 111851. 2660.55   5
  -7   2   3 99166.7 2706.10   4
  -7  -2   2 67998.0 2033.62   5
  -7  -2   2 70435.3 2380.18   2
  -7  -2   2 66916.4 2810.75   4
  -7   2   2 65443.5 2099.05   4
  -7  -2   1 6056.60 543.879   5
  -7  -2   1 7101.48 799.006   2
  -7   2   1 5952.50 792.865   2
  -7  -2   1 5222.40 789.054   4
  -7  -2   0 55509.1 1479.39   5
  -7   2   0 62839.2 2537.29   2
   7  -2   0 55019.3 1731.44   4
  -7  -2   0 55754.2 2544.38   4
  -7  -2   0 60499.7 2456.82   2
  -7  -2  -1 20.5479 115.539   4
  -7   2  -1-122.993 159.587   2
   7  -2   1-56.4119 99.1455   4
  -7  -2  -1-26.5123 29.3516   5
  -7   2  -1 51.5674 47.6683   3
  -7  -2  -1 79.3852 80.9487   2
   7  -2   2 6807.25 694.973   4
  -7  -2  -2 6260.54 389.703   5
  -7   2  -2 7319.76 848.342   2
  -7   2  -2 5734.68 576.198   3
  -7  -2  -2 7113.71 932.712   2
  -7  -2  -2 6487.11 425.416   5
  -7  -2  -2 6587.64 880.893   4
  -7   2  -3 201.583 141.028   2
  -7  -2  -3 111.462 51.9074   5
  -7  -2  -3 486.451 206.448   2
  -7  -2  -4 5040.58 415.672   5
  -7   2  -4 5816.21 940.620   5
  -7   2  -4 5314.91 709.383   2
  -7  -2  -4 5292.84 870.385   2
  -7   2  -5 409.509 207.540   2
  -7   2  -5 1145.41 386.257   5
   7  -2   5 573.185 187.135   3
  -7  -2  -5 756.819 177.946   5
   7  -2   6 3477.31 597.633   3
  -7  -2  -6 2904.66 400.047   5
  -7   2  -6 2906.06 533.196   2
  -7   2  -6 3884.45 783.187   5
  -7   2  -7 255.411 143.526   2
   7  -2   7 13.0530 129.576   3
  -7  -2  -7 20.9845 62.9875   5
  -7   2  -7-92.8537 289.955   5
  -7   2  -8 2461.90 525.784   2
  -7  -2  -8 2868.36 469.171   5
   7  -2   8 3381.79 618.014   3
  -7   2  -8 2416.26 671.565   5
  -7  -2  -8 2496.46 269.403   1
  -7   2  -9 3891.81 676.255   2
   7  -2   9 4198.17 735.076   3
  -7  -2  -9 3335.27 547.067   5
  -7   2  -9 4724.93 949.431   5
   7  -2  10 24027.0 1862.83   3
  -7  -2 -10 21264.9 1466.82   5
  -7   2 -10 25653.8 2247.84   5
  -7   2 -10 25186.7 1833.31   2
  -7   2 -11-94.7596 189.094   5
   7  -2  11 313.748 220.499   3
  -7  -2 -11 125.287 104.418   5
  -7   2 -11 34.2832 57.9911   2
   7  -2  12 419.110 363.791   3
  -7  -2 -12 344.793 279.688   5
  -7   2 -12-55.3138 73.1388   2
  -7   2 -12 516.203 350.630   5
   7  -2  13 4971.34 1013.93   3
  -7  -2 -13 4241.61 742.934   5
  -7   2 -13 4030.85 974.220   5
  -7   2 -13 5084.62 920.563   2
  -7  -2 -14-103.090 116.271   5
  -7   2 -14 101.239 87.8976   5
  -7   2 -15-2.08707 196.061   5
  -7  -2 -15 496.932 272.782   5
   7  -2  15 454.641 357.782   3
   7  -2  16 1552.32 728.530   3
  -7   2 -16 1390.85 620.403   5
   7  -2  17 2001.49 807.819   3
  -7   2 -17 1672.31 699.178   5
   7  -2  18 61.6589 229.959   3
  -7   2 -18-245.053 314.448   5
   7  -2  19 745.889 580.671   3
  -7   2 -19-199.589 123.977   5
   7  -2  20 548.811 653.748   3
  -7   2 -20 225.358 340.111   5
   7  -2  21 180.803 440.731   3
  -7   2 -21 264.525 234.497   5
  -7   2 -22 185.143 266.613   5
   7  -2  22 1740.51 1094.59   3
   7   3 -25-125.509 223.428   5
  -7  -3  25-65.1692 269.634   3
  -7  -3  24-221.248 295.920   3
   7   3 -24-146.669 247.804   5
   7   3 -23 841.601 519.006   5
  -7  -3  23 869.473 544.667   3
  -7  -3  22 412.660 388.093   3
   7   3 -22 276.436 296.814   5
  -7  -3  21 638.779 425.015   3
   7   3 -21 312.151 218.661   5
  -7  -3  20 1500.99 652.150   3
   7   3 -20 1674.29 685.304   5
  -7  -3  19 1290.07 567.204   3
   7   3 -19 1652.13 731.450   5
   7   3 -18 6052.17 1221.53   5
  -7  -3  18 6114.97 1289.52   3
   7   3 -17 9949.79 1555.45   5
  -7  -3  17 8033.45 1392.68   3
   7  -3 -17 8142.88 1296.28   1
   7   3 -16 9845.08 1527.63   5
   7  -3 -16 9884.93 1423.42   1
  -7  -3  16 8399.23 1416.83   3
  -7  -3  15 13353.1 1769.09   3
   7   3 -15 13794.5 1741.83   5
   7  -3 -15 11736.9 1508.91   1
   7  -3 -14 337.536 322.900   1
  -7  -3  14 229.883 216.165   3
   7   3 -14 1019.38 455.912   5
   7  -3 -13 5274.16 992.901   1
   7   3 -13 5889.37 1055.58   5
   7  -3 -12 780.456 461.323   1
   7   3 -12 547.704 312.995   5
   7   3 -11 10188.9 1289.87   5
   7  -3 -11 9448.38 1278.64   1
   7   3 -10 110.028 122.622   5
   7  -3 -10-28.9935 113.790   1
   7  -3  -9 185.067 178.331   1
   7   3  -9 151.300 168.261   5
  -7  -3   9 124.862 63.3083   2
  -7  -3   8 12986.1 703.379   2
   7   3  -8 14541.6 1361.65   5
   7  -3  -8 13541.1 1472.10   1
   7   3  -7 2481.24 543.677   5
   7  -3  -7 1818.02 543.308   1
  -7  -3   7 2514.66 349.936   2
   7  -3  -6-7.53888 82.2182   1
   7   3  -6-32.7497 77.8506   5
  -7  -3   6 153.773 93.6613   2
   7   3  -5 2416.29 479.044   5
   7   3  -5 1484.32 319.117   2
  -7  -3   5 1652.31 492.942   4
  -7  -3   5 1577.18 327.881   2
   7   3  -4 11695.3 952.417   5
  -7  -3   4 11566.3 1372.13   4
   7   3  -3 8965.69 750.179   5
  -7  -3   3 7447.34 735.818   5
  -7  -3   3 9783.13 1268.95   4
  -7  -3   2 3874.18 762.221   4
  -7  -3   2 3014.86 416.149   5
   7   3  -2 4081.27 456.156   5
  -7  -3   1 5132.73 425.778   5
   7  -3  -1 5770.69 766.869   4
  -7  -3   1 6776.17 1055.34   4
   7  -3   0 154.012 142.626   4
  -7  -3   0-98.9078 90.5383   4
  -7   3   0-46.4923 170.192   2
  -7  -3  -1 1760.68 529.251   4
   7  -3   1 1171.49 358.090   4
  -7   3  -1 1728.93 455.746   2
   7   3   1 1115.54 278.076   1
  -7   3  -2 728.172 293.692   2
   7  -3   2 588.698 267.821   4
   7   3   2 335.784 134.713   1
  -7  -3  -2 859.913 355.188   4
  -7   3  -3 2886.49 554.587   2
   7  -3   3 3160.16 626.240   4
  -7   3  -3 3949.16 855.851   5
  -7   3  -4 1921.04 459.004   2
   7  -3   4 1335.06 434.162   4
  -7   3  -4 1359.33 492.329   5
  -7   3  -5 253.304 153.280   2
  -7   3  -5 97.3806 183.342   5
  -7   3  -6 3043.88 741.366   5
  -7   3  -6 2967.03 553.251   2
  -7   3  -7 9.71407 91.0404   2
  -7   3  -7-95.5781 135.079   5
  -7   3  -8 3211.62 589.662   2
  -7   3  -8 2486.82 739.107   5
  -7   3  -9 286.569 110.664   2
  -7   3  -9-98.4213 307.844   5
  -7   3 -10 92.8574 142.823   2
  -7   3 -10-70.5969 349.292   5
  -7   3 -11 888.415 498.977   5
   7  -3  11 581.824 145.556   3
  -7   3 -11 1104.65 384.533   2
  -7   3 -12 385.142 339.249   5
   7  -3  12 849.918 448.591   3
  -7   3 -12 539.496 265.462   2
  -7   3 -13 1018.99 529.685   5
   7  -3  13 782.696 398.155   3
  -7   3 -13 168.186 174.161   2
   7  -3  14-38.1208 221.202   3
  -7   3 -14 23.0725 210.371   5
  -7   3 -15 350.659 333.939   5
   7  -3  15-49.5222 201.831   3
  -7   3 -16 184.473 191.560   5
   7  -3  16 191.788 239.125   3
   7  -3  17 272.155 228.256   3
  -7   3 -17 500.544 399.799   5
   7  -3  18 637.370 511.342   3
  -7   3 -18-140.500 169.085   5
  -7   3 -19-289.930 494.179   5
  -7   3 -20 264.972 405.281   5
   7  -4 -23 223.112 280.158   1
   7   4 -23-249.212 299.658   5
   7  -4 -22 610.305 378.472   1
   7   4 -22 187.822 253.043   5
   7   4 -21 781.422 569.549   5
   7  -4 -21 427.916 249.067   1
   7  -4 -20 186.410 165.418   1
   7   4 -20 476.503 376.025   5
   7   4 -19 266.741 247.477   5
   7  -4 -19 508.805 351.826   1
   7  -4 -18 83.5269 72.6689   1
   7   4 -18 210.712 214.289   5
   7   4 -17-135.361 301.080   5
   7  -4 -17 230.590 294.711   1
   7   4 -16 2080.40 717.393   5
   7  -4 -16 1446.82 568.448   1
   7  -4 -15 1858.84 644.377   1
   7   4 -15 2014.85 677.108   5
   7  -4 -14 1906.96 637.867   1
   7   4 -14 1488.89 511.193   5
   7   4 -13 13756.1 1695.15   5
   7  -4 -13 13150.3 1659.90   1
   7   4 -12 27000.0 2291.12   5
   7  -4 -12 24690.1 2312.44   1
   7  -4 -11 5918.34 1074.75   1
   7   4 -11 8869.21 1254.78   5
   7   4 -10 7473.47 1135.16   5
   7  -4 -10 7228.52 1219.90   1
   7   4  -9 663.549 279.371   5
   7  -4  -9 598.209 300.812   1
  -7  -4   8 5858.22 1164.58   4
   7   4  -8 5417.10 889.725   5
  -7  -4   7 16577.0 1987.78   4
   7   4  -7 13266.1 1328.59   5
   7   4  -6 9119.88 1036.57   5
  -7  -4   6 10966.3 1568.85   4
  -7  -4   5 313.439 400.099   4
   7   4  -5 236.576 206.541   5
   7   4  -4 9191.41 904.329   5
  -7  -4   4 11141.0 1549.49   4
  -7  -4   3 4412.41 980.477   4
   7   4  -3 4718.88 571.737   5
  -7  -4   2-201.830 116.230   4
   7   4  -2 26.5996 51.5900   5
   7  -4  -1 7276.85 1033.47   4
  -7  -4   1 7729.61 1244.47   4
   7  -4   0 3836.54 759.083   4
  -7  -4   0 3643.50 822.597   4
  -7   4   0 4544.02 823.694   2
   7  -4   1 133.373 153.644   4
  -7  -4  -1 219.094 164.098   4
  -7   4  -1-17.3680 141.599   2
  -7   4  -1 354.965 263.743   5
  -7  -4  -2 425.307 269.203   4
   7  -4   2 1513.36 510.894   4
  -7   4  -2 1514.80 435.411   2
  -7   4  -2 1132.71 509.252   5
   7  -4   3 681.773 345.781   4
  -7   4  -3 111.502 119.719   5
  -7   4  -3 1157.61 394.253   2
   7  -4   4 3834.91 816.033   4
  -7   4  -4 3924.47 685.425   2
  -7   4  -4 3678.32 905.067   5
   7  -4   5 478.414 312.609   4
  -7   4  -5 489.403 237.403   2
  -7   4  -5 429.574 232.892   5
   7  -4   6 8.61597 104.808   4
  -7   4  -6-43.4207 60.4739   2
  -7   4  -6-342.309 413.869   5
   7  -4   7 130.475 161.017   4
  -7   4  -7 533.170 351.487   5
  -7   4  -8 1206.93 463.906   5
  -7   4  -9 7599.95 1433.67   5
  -7   4 -10-39.0643 296.673   5
  -7   4 -11 464.914 369.116   5
  -7   4 -12-244.363 323.703   5
  -7   4 -13 131.651 181.412   5
  -7   4 -14 567.885 419.413   5
  -7   4 -15 983.877 611.709   5
  -7   4 -16 244.627 326.544   5
  -7   4 -17 429.635 434.686   5
  -7   4 -18 1301.86 682.200   5
   7   5 -21 275.223 294.737   5
   7   5 -20-30.3639 126.040   5
   7   5 -19 83.3386 179.488   5
   7  -5 -19-90.1022 91.2971   1
   7  -5 -18-61.0751 122.573   1
   7   5 -18-65.8969 251.794   5
   7  -5 -17 83.0408 110.944   1
   7   5 -17 304.637 205.126   5
   7  -5 -16 567.930 407.710   1
   7   5 -16 256.430 274.651   5
   7   5 -15 1437.26 607.744   5
   7  -5 -15 2115.90 734.265   1
   7   5 -14-38.5808 70.9804   5
   7  -5 -14 191.708 309.344   1
   7   5 -13 32.4995 87.5681   5
   7   5 -12 1064.44 502.780   5
  -7  -5  12 2837.81 962.959   4
  -7  -5  11 1039.48 564.556   4
   7   5 -11 721.973 379.188   5
  -7  -5  10 233.833 184.632   4
   7   5 -10-69.9489 212.830   5
  -7  -5   9 881.367 612.220   4
  -7  -5   8 95.1365 158.376   4
  -7  -5   7 856.404 445.764   4
  -7  -5   6 187.828 230.983   4
  -7  -5   5-31.3014 210.463   4
  -7  -5   4 328.945 393.002   4
  -7  -5   3 6279.90 1301.77   4
  -7  -5   2 3211.34 932.254   4
  -7   5   2 2714.81 872.011   5
  -7  -5   1 3763.70 984.027   4
  -7   5   1 3672.21 976.542   5
  -7  -5   0 45.0773 252.810   4
  -7   5   0 264.595 200.010   5
  -7   5   0 721.171 351.361   2
   7  -5   0 722.976 391.974   4
  -7  -5  -1 164.912 288.139   4
   7  -5   1 201.019 229.721   4
  -7   5  -1-75.2736 292.544   5
   7  -5   2 266.352 220.548   4
  -7   5  -2 1534.64 643.456   5
   7  -5   3 24.6243 135.200   4
  -7   5  -3 1629.89 725.698   5
   7  -5   4 750.207 382.111   4
  -7   5  -4 482.054 386.737   5
   7  -5   5 36.0956 221.300   4
  -7   5  -5 100.928 196.910   5
   7  -5   6 138.979 125.680   4
  -7   5  -6-144.451 176.274   5
   7  -5   7 2405.21 779.590   4
  -7   5  -7 3345.43 975.346   5
  -7   5  -8 249.959 361.086   5
  -7   5  -9 482.689 409.300   5
  -7   5 -10 325.480 375.134   5
  -7   5 -11-55.1887 317.810   5
  -7   5 -12 1873.11 818.865   5
  -7   5 -13 1719.53 800.776   5
  -7   5 -14 408.343 380.041   5
  -7   5 -15 2007.88 895.014   5
  -7  -6  14 262.556 332.421   4
  -7  -6  13 384.820 394.594   4
  -7  -6  12 1383.12 725.909   4
  -7  -6  11 1031.68 636.223   4
  -7  -6  10-321.888 362.892   4
  -7  -6   9-114.894 154.482   4
  -7  -6   8-97.7141 371.206   4
  -7  -6   7 489.510 436.109   4
  -7  -6   6-77.7582 79.7302   4
  -7  -6   5 616.037 487.823   4
  -7  -6   4-39.3763 403.204   4
  -7  -6   3 287.550 134.769   4
  -7  -6   2 1007.27 536.066   4
  -7  -6   1-54.2197 183.721   4
  -7   6   1-154.714 356.348   5
  -7   6   0-249.094 333.862   5
  -7  -6   0-427.065 368.059   4
  -7   6  -1-47.8145 139.607   5
  -7   6  -2 539.385 346.155   5
  -7   6  -3 172.262 299.257   5
  -7   6  -4-188.562 327.910   5
  -7   6  -5 12.0929 186.549   5
  -7   6  -6-409.244 380.329   5
  -7   6  -7-536.265 437.131   5
  -7   6  -8-90.9339 371.629   5
  -7   6  -9 82.4784 306.365   5
  -7   6 -10-47.5270 183.323   5
  -7   6 -11 53.7351 158.635   5
  -7   6 -12 334.794 423.289   5
   8   0 -28 187.151 324.674   5
   8   0 -27-44.3631 217.098   5
  -8   0  27 1420.46 880.397   3
   8   0 -26 373.732 371.165   5
  -8   0  26-94.7181 339.972   3
   8   0 -25 732.788 499.385   5
   8   0 -24 3484.52 982.068   5
   8   0 -23 1065.57 691.660   5
   8   0 -22 443.708 377.211   5
   8   0 -21 237.583 285.208   5
   8   0 -20 2828.49 785.304   5
   8   0 -19 269.011 246.767   5
   8   0 -18 58.9878 310.249   5
   8   0 -17 337.611 324.882   5
   8   0 -16 472.999 258.822   5
   8   0 -15-199.507 231.223   5
   8   0 -14 975.292 406.648   5
   8   0 -13 251.994 242.213   5
   8   0 -12 34895.3 2230.47   5
   8   0 -11-60.8042 194.728   5
   8   0 -10 5298.02 829.658   5
  -8   0   9 42.2928 91.6100   3
  -8   0   8 5137.53 641.327   3
  -8   0   7 127.102 184.496   3
  -8   0   6 45268.8 1775.60   3
  -8   0   5-128.555 135.957   3
  -8   0   4 90202.0 2941.01   2
  -8   0   4 88638.4 2121.35   3
  -8   0   3 96.2764 135.542   2
   8   0  -3 28.1061 63.7633   3
  -8   0   2 2042.33 424.817   2
   8   0  -2 1935.40 344.470   1
   8   0  -2 1624.81 249.870   3
  -8   0   2 1902.49 282.996   4
   8   0  -1-15.9199 55.0987   1
  -8   0   1-17.3537 26.1899   4
  -8   0   1 80.6572 195.694   2
  -8   0   0 141583. 2944.56   1
   8   0   0 141308. 2986.63   1
  -8   0   0 139799. 3504.06   2
   8   0   1 5.73787 50.8519   4
  -8   0  -1-33.7378 63.0031   1
  -8   0  -1-24.6393 173.743   2
  -8   0  -2 148396. 3816.39   2
  -8   0  -2 141421. 3066.42   1
   8   0   2 140510. 2833.80   4
  -8   0  -3-26.5555 179.683   2
  -8   0  -3 17.0416 73.3397   1
  -8   0  -4 34027.4 1938.68   2
  -8   0  -4 36991.2 1943.99   5
  -8   0  -5 29.1642 73.0731   2
  -8   0  -5-84.2290 135.331   5
  -8   0  -6 148706. 4177.99   5
  -8   0  -6 153414. 4425.65   2
  -8   0  -7-156.536 82.7204   2
  -8   0  -7 342.715 208.573   5
  -8   0  -8 8942.07 1128.13   5
  -8   0  -8 9512.94 1210.68   2
  -8   0  -9 84.2365 223.835   5
  -8   0  -9-66.7167 89.0949   2
  -8   0 -10 8479.80 1205.24   2
  -8   0 -10 9457.57 1201.01   5
  -8   0 -11 133.422 200.418   5
  -8   0 -11-90.2445 229.720   2
  -8   0 -12 3502.82 769.864   5
  -8   0 -13 106.464 116.792   5
  -8   0 -14 23264.0 2147.01   5
  -8   0 -15 230.296 327.576   5
  -8   0 -16 951.952 539.689   5
  -8   0 -17 713.699 468.278   5
  -8   0 -18 5195.32 1124.50   5
  -8   0 -19 131.205 84.5147   5
  -8   0 -20-36.7584 134.727   5
  -8   0 -21 43.9140 254.903   5
  -8   0 -22-340.786 318.840   5
  -8   0 -23 109.993 87.2016   5
  -8   0 -24-44.7408 124.114   5
   8  -1 -28 158.090 242.618   5
   8   1 -27 280.129 309.757   5
   8  -1 -27 473.603 364.173   5
  -8  -1  27-268.885 312.721   3
   8  -1 -26 226.617 354.681   5
   8   1 -26 159.237 349.908   5
  -8  -1  26 1236.70 901.523   3
   8   1 -25-89.3885 154.256   5
   8  -1 -25-261.461 189.218   5
   8   1 -24 451.719 324.562   5
  -8  -1  24 1817.75 1005.47   3
   8  -1 -24 711.008 448.812   5
   8  -1 -23 2328.96 784.691   5
   8   1 -23 3333.15 963.543   5
  -8  -1  23 4918.33 1338.41   3
   8   1 -22 845.278 502.299   5
   8  -1 -22 276.335 375.518   5
  -8  -1  22 242.592 501.385   3
   8  -1 -21 2521.94 800.772   5
  -8  -1  21 3179.15 1005.23   3
   8   1 -21 3324.23 937.487   5
   8  -1 -20 2440.66 758.879   5
   8   1 -20 1334.40 605.244   5
  -8  -1  20 3759.60 1028.59   3
   8  -1 -19 5036.48 1050.45   5
  -8  -1  19 5325.95 1197.79   3
   8   1 -19 5614.43 1097.86   5
   8  -1 -18 1023.16 432.589   5
   8   1 -18 808.978 487.402   5
  -8  -1  18 1266.11 532.399   3
   8   1 -17 3463.08 834.191   5
   8  -1 -17 3147.23 776.816   5
  -8  -1  17 3135.83 764.186   3
   8   1 -16 1320.83 531.435   5
   8  -1 -16 1674.50 567.379   5
  -8  -1  16 1974.94 804.471   3
   8   1 -15 926.824 401.088   5
  -8  -1  15 538.140 369.496   3
   8  -1 -15 482.051 293.712   5
   8   1 -14 3047.14 748.900   5
  -8  -1  14 3770.73 814.657   3
   8   1 -13 117.196 203.817   5
  -8  -1  13-29.1135 167.382   3
   8   1 -12 18768.1 1649.70   5
  -8  -1  12 21431.3 1747.85   3
  -8  -1  11 1117.20 434.006   3
   8   1 -11 725.577 309.691   5
   8   1 -10 2700.70 575.311   5
  -8  -1  10 3703.89 696.976   3
   8   1  -9 41763.2 2216.35   5
  -8  -1   9 42894.5 2275.94   3
   8   1  -8 3415.55 602.902   5
  -8  -1   8 3890.78 679.141   3
  -8  -1   7 4078.70 600.747   2
   8   1  -7 4430.77 682.022   5
  -8  -1   7 5274.77 753.104   3
  -8  -1   6 1002.88 294.450   3
  -8  -1   6 1316.06 341.040   2
  -8  -1   5 4998.20 644.876   2
  -8  -1   4 93472.5 2714.97   2
  -8  -1   3 801.601 285.035   2
  -8   1   2 14435.4 1223.80   2
  -8  -1   2 15830.5 1137.13   2
  -8  -1   2 13452.0 1051.73   4
  -8   1   1 23755.5 1549.45   2
  -8  -1   1 21824.6 1330.05   4
  -8  -1   1 23824.1 1443.33   2
  -8   1   0 1198.57 368.739   2
  -8  -1   0 705.137 228.573   4
   8   1   0 779.303 150.586   1
  -8  -1   0 787.897 285.658   2
  -8  -1  -1 22917.1 1492.12   2
  -8   1  -1 23017.7 1494.83   2
  -8  -1  -1 24230.1 1417.45   4
   8  -1   2 13297.8 608.053   3
  -8  -1  -2 11939.3 1122.63   2
  -8   1  -2 13907.6 1161.76   2
  -8   1  -3 58208.9 2403.44   2
   8  -1   3 59468.3 1510.02   3
  -8  -1  -3 58937.9 2603.67   2
  -8   1  -4-31.8753 200.760   5
  -8  -1  -4 560.329 287.001   2
  -8  -1  -4 176.294 60.7622   1
   8  -1   4 558.769 203.041   3
  -8   1  -4-3.68964 131.953   2
  -8  -1  -4 271.677 150.910   5
  -8   1  -5 57441.7 2800.59   5
  -8  -1  -5 53744.0 2146.78   5
  -8  -1  -5 56419.0 2770.90   2
  -8   1  -5 58363.6 2541.84   2
  -8   1  -6 1042.42 376.120   2
  -8  -1  -6 638.424 187.969   5
  -8   1  -6 983.667 362.948   5
  -8  -1  -6 1195.00 368.402   2
  -8   1  -7 5759.29 836.792   2
  -8   1  -7 6181.27 946.496   5
  -8  -1  -7 5486.21 937.149   2
  -8  -1  -7 5523.20 744.574   5
  -8   1  -8 4640.81 853.161   5
  -8  -1  -8 4472.11 703.327   5
  -8   1  -8 4362.72 775.232   2
  -8  -1  -8 4637.20 869.767   2
  -8   1  -9 304.910 191.331   2
  -8  -1  -9 474.037 239.847   2
  -8  -1  -9 194.958 121.913   5
  -8   1  -9 172.386 123.390   5
  -8   1 -10 90.5515 104.172   5
  -8  -1 -10 312.799 156.486   5
  -8   1 -10 4.23093 111.150   2
  -8  -1 -11 2780.22 620.965   5
  -8   1 -11 3715.68 851.834   5
  -8   1 -11 2268.91 625.978   2
  -8  -1 -12 9841.20 1232.45   5
  -8   1 -12 11199.4 1494.81   5
  -8   1 -12 11772.6 1458.32   2
  -8  -1 -13 3350.11 727.775   5
  -8   1 -13 2785.91 729.527   2
  -8   1 -13 3830.00 904.463   5
  -8   1 -14 141.049 320.840   5
  -8  -1 -14 391.515 379.399   5
  -8   1 -15 1363.41 553.925   5
  -8  -1 -15 517.491 349.434   5
  -8  -1 -16 2403.88 667.044   5
  -8   1 -16 2464.01 767.987   5
  -8  -1 -17 2348.15 694.861   5
  -8   1 -17 3221.62 882.361   5
  -8  -1 -18 1361.60 581.313   5
  -8   1 -18 1873.97 726.840   5
  -8  -1 -19-87.6311 230.332   5
  -8   1 -19 192.002 406.495   5
  -8  -1 -20 3019.71 832.359   5
  -8   1 -20 4272.33 1122.84   5
  -8   1 -21-1.94883 127.316   5
   8  -1  21 2815.69 1205.16   3
  -8   1 -22 722.073 461.011   5
   8  -1  22-349.297 588.870   3
  -8   1 -23-100.703 239.827   5
   8  -1  23 378.507 598.834   3
   8   2 -26 759.916 505.954   5
  -8  -2  26 1074.84 759.644   3
  -8  -2  25 213.496 147.517   3
   8   2 -25-209.170 335.699   5
  -8  -2  24 982.188 743.428   3
   8   2 -24 72.2522 195.636   5
   8   2 -23 778.472 480.280   5
  -8  -2  23 506.937 432.858   3
   8   2 -22 866.751 534.043   5
  -8  -2  22 448.091 429.830   3
   8   2 -21 599.866 456.813   5
  -8  -2  21-486.101 372.827   3
   8   2 -20 547.878 419.433   5
  -8  -2  20 312.769 310.985   3
  -8  -2  19 4059.14 975.903   3
   8   2 -19 4387.28 1023.00   5
   8   2 -18 1436.57 611.003   5
  -8  -2  18 966.700 357.594   3
   8   2 -17 9059.31 1448.63   5
  -8  -2  17 8159.15 1371.87   3
   8   2 -16 16868.8 1896.40   5
  -8  -2  16 15250.4 1778.05   3
  -8  -2  15 4614.51 951.080   3
   8   2 -15 5830.29 1104.36   5
   8   2 -14 5213.35 982.551   5
  -8  -2  14 5698.18 1027.35   3
   8   2 -13 503.934 338.653   5
  -8  -2  13 475.731 299.461   3
   8   2 -12 184.394 230.280   5
  -8  -2  12 976.449 457.434   3
  -8  -2  11 20616.2 1307.80   2
  -8  -2  11 24168.1 2035.43   3
   8   2 -11 23636.9 1879.49   5
  -8  -2  10 2398.54 426.052   2
  -8  -2  10 1503.71 449.458   3
   8   2 -10 2363.46 587.314   5
   8  -2 -10 2469.89 642.679   1
  -8  -2   9 47.1006 115.791   2
   8   2  -9 269.694 191.101   5
  -8  -2   8 5.75643 36.4456   2
   8   2  -8-70.2427 172.255   5
   8   2  -7 16145.1 1290.67   5
  -8  -2   7 16114.3 1006.80   2
   8   2  -6 63144.6 2423.02   5
  -8  -2   6 60735.1 1994.38   2
  -8  -2   5 753.429 221.832   2
   8   2  -5 489.571 187.534   5
  -8  -2   4 30918.6 1973.46   4
  -8  -2   4 32459.7 1561.91   2
  -8   2   4 26731.2 1421.61   4
  -8   2   3-187.383 111.909   4
  -8  -2   3-57.4903 204.117   4
  -8  -2   3 19.3838 96.5870   2
  -8  -2   3-54.5188 105.751   5
  -8  -2   2-98.7840 174.894   4
  -8  -2   2-32.2424 41.9632   2
  -8  -2   2 36.6703 72.0662   5
  -8   2   1 15707.0 1372.13   2
  -8  -2   1 14592.4 939.422   5
  -8  -2   1 14812.4 1204.70   2
  -8  -2   1 14922.2 1341.54   4
  -8   2   0 9468.01 1038.37   2
  -8   2   0 7142.56 552.138   3
  -8  -2   0 8507.23 647.850   5
  -8  -2   0 7649.08 903.490   2
   8  -2   0 7987.57 613.428   4
  -8  -2   0 7784.53 957.626   4
  -8   2  -1 24452.5 1638.63   2
  -8  -2  -1 24381.6 1051.35   5
  -8   2  -1 24612.2 1060.61   3
  -8  -2  -1 27466.2 1800.81   2
  -8  -2  -1 27714.8 1831.00   4
   8  -2   1 25127.4 1150.47   4
  -8  -2  -2 86976.0 1779.06   5
  -8  -2  -2 96797.0 3540.30   2
  -8   2  -2 90408.6 3139.95   2
   8  -2   2 99542.0 2468.81   4
  -8   2  -3 741.023 318.377   2
  -8  -2  -3 632.893 298.600   2
  -8  -2  -3 701.000 166.677   5
  -8  -2  -4 353.999 120.306   5
  -8   2  -4 311.284 191.773   2
  -8   2  -4 545.161 283.770   5
  -8  -2  -4 261.950 94.8013   2
   8  -2   5 4924.73 659.956   3
  -8  -2  -5 4560.25 487.605   5
  -8   2  -5 6849.83 1058.26   5
  -8   2  -5 5124.88 736.810   2
  -8  -2  -5 4378.09 838.816   2
  -8   2  -6 290.956 142.729   2
   8  -2   6 205.655 103.002   3
  -8  -2  -6 545.511 319.334   2
  -8   2  -6 778.953 382.955   5
  -8  -2  -6 327.608 131.444   5
   8  -2   7 22975.6 1582.53   3
  -8   2  -7 23677.9 2057.99   5
  -8  -2  -7 20748.3 1220.65   5
  -8   2  -7 23554.7 1661.11   2
  -8   2  -8 1034.65 358.716   2
   8  -2   8 528.116 128.442   3
  -8  -2  -8 782.398 256.282   5
  -8   2  -8 776.341 378.441   5
  -8   2  -9 3598.67 697.010   2
   8  -2   9 3848.57 701.824   3
  -8  -2  -9 3837.61 597.234   5
  -8  -2  -9 2827.74 280.620   1
  -8   2  -9 4390.51 920.965   5
   8  -2  10 32645.5 2176.89   3
  -8  -2 -10 24629.0 1586.35   5
  -8   2 -10 29843.0 2486.30   5
  -8   2 -10 28484.4 2021.75   2
   8  -2  11 546.515 243.870   3
  -8  -2 -11 530.228 228.209   5
  -8   2 -11 571.023 348.064   5
  -8   2 -11 351.285 190.853   2
  -8  -2 -12 340.886 181.214   5
  -8   2 -12 376.584 308.295   5
   8  -2  12 773.294 441.448   3
  -8   2 -12 311.500 209.247   2
   8  -2  13 10423.0 1478.38   3
  -8  -2 -13 7179.84 972.843   5
  -8   2 -13 7463.46 1175.35   2
  -8   2 -13 10040.2 1547.07   5
   8  -2  14 3615.49 958.717   3
  -8   2 -14 2496.96 853.185   5
   8  -2  15 4368.18 1063.21   3
  -8   2 -15 2778.06 844.379   5
   8  -2  16 637.623 541.978   3
  -8   2 -16-195.424 333.564   5
  -8   2 -17-162.089 263.522   5
   8  -2  17 343.492 455.122   3
   8  -2  18 288.110 311.028   3
  -8   2 -18 21.8023 227.514   5
   8  -2  19 249.700 222.338   3
  -8   2 -19-175.841 416.663   5
  -8   2 -20 146.799 299.614   5
  -8   2 -21 307.753 328.069   5
  -8   2 -22 1574.82 769.182   5
  -8  -3  25 638.393 602.626   3
   8   3 -25 5.12184 84.9711   5
   8   3 -24 202.081 254.015   5
  -8  -3  24 519.810 450.961   3
   8   3 -23 302.574 313.568   5
  -8  -3  23 765.921 553.122   3
  -8  -3  22 182.272 285.799   3
   8   3 -22 33.1603 232.564   5
  -8  -3  21 559.732 348.335   3
   8   3 -21 232.815 355.837   5
  -8  -3  20 1700.25 742.761   3
   8   3 -20 1692.65 759.288   5
   8   3 -19 2103.40 722.522   5
  -8  -3  19 3979.03 1029.86   3
   8   3 -18 1505.87 684.017   5
   8  -3 -18 1124.97 504.426   1
  -8  -3  18 862.606 453.503   3
   8  -3 -17 2997.39 830.501   1
  -8  -3  17 3339.83 932.922   3
   8   3 -17 3162.32 893.901   5
  -8  -3  16 30537.9 2730.36   3
   8   3 -16 29377.8 2596.02   5
   8  -3 -16 30847.0 2582.67   1
  -8  -3  15 18133.6 2034.84   3
   8   3 -15 16797.4 1915.46   5
   8  -3 -15 18157.4 1951.80   1
   8   3 -14 796.225 460.182   5
   8  -3 -14 723.341 503.526   1
   8   3 -13 269.029 321.754   5
   8  -3 -13 560.584 336.556   1
   8   3 -12 5231.63 963.432   5
   8  -3 -12 4735.35 930.100   1
   8   3 -11 768.348 349.551   5
   8  -3 -11 875.536 426.525   1
   8   3 -10 6982.58 1030.89   5
   8  -3 -10 7371.41 1141.27   1
  -8  -3  10 5180.98 453.592   2
  -8  -3   9 313.424 121.391   2
   8   3  -9 219.931 189.894   5
   8  -3  -9 672.702 368.599   1
  -8  -3   8 211.282 111.552   2
   8   3  -8 191.245 196.868   5
   8  -3  -8 313.871 216.439   1
   8   3  -7 5588.68 798.354   5
  -8  -3   7 5522.05 589.517   2
   8  -3  -7 5513.08 960.437   1
   8  -3  -6 2884.94 717.301   1
  -8  -3   6 2920.48 752.284   4
   8   3  -6 2538.80 508.712   5
  -8  -3   6 2794.97 442.134   2
  -8  -3   5 3167.44 732.622   4
   8   3  -5 3081.75 519.206   5
  -8  -3   5 3358.39 530.992   2
  -8  -3   4 4358.89 841.613   4
  -8  -3   4 3991.37 609.064   2
   8   3  -4 3537.99 528.627   5
  -8  -3   3 14049.6 1213.02   2
  -8  -3   3 11824.5 1412.40   4
  -8  -3   2 963.220 376.299   4
  -8  -3   2 1076.54 249.425   5
  -8  -3   2 1227.62 371.684   2
  -8   3   1 13198.1 1376.91   2
  -8  -3   1 8840.09 555.668   5
  -8  -3   1 12482.0 1250.55   2
  -8  -3   1 12585.2 1405.20   4
   8  -3   0 2412.76 476.986   4
  -8  -3   0 1843.27 570.283   4
  -8   3   0 2723.60 605.416   2
  -8  -3  -1-8.47436 91.5900   4
   8  -3   1 100.360 106.629   4
  -8   3  -1 72.0848 97.2877   2
   8   3   1-9.57397 19.6611   1
  -8   3  -2 1000.15 356.424   2
   8  -3   2 1766.86 443.167   4
   8   3   2 948.046 197.352   1
  -8  -3  -2 1245.73 472.893   4
   8  -3   3 622.444 207.059   4
  -8   3  -3 635.085 273.977   2
   8  -3   4-43.4260 111.969   4
  -8   3  -4 132.432 184.324   2
  -8   3  -4 211.787 276.889   5
  -8   3  -5 3642.26 639.968   2
  -8   3  -5 5355.96 1030.24   5
  -8   3  -6-25.1498 130.929   5
  -8   3  -6 4.11052 55.6885   2
  -8   3  -7 2860.96 572.991   2
  -8   3  -7 2385.01 675.808   5
  -8   3  -8 227.976 219.545   2
  -8   3  -8-62.8878 111.768   5
  -8   3  -9 160.321 136.985   2
  -8   3  -9-218.855 301.517   5
  -8   3 -10 27.6497 39.6585   2
  -8   3 -10-336.778 555.123   5
   8  -3  11-154.378 327.506   3
  -8   3 -11-340.226 357.722   5
  -8   3 -11 208.187 178.648   2
   8  -3  12-266.229 363.244   3
  -8   3 -12 566.940 345.387   5
  -8   3 -12-40.0654 178.974   2
  -8   3 -13 765.743 289.712   5
  -8   3 -13 1501.66 507.747   2
   8  -3  13 2124.73 698.559   3
  -8   3 -14 294.475 389.923   5
   8  -3  14 563.675 442.582   3
   8  -3  15 783.474 470.428   3
  -8   3 -15 428.933 320.879   5
  -8   3 -16 288.245 371.936   5
  -8   3 -17-68.9544 241.952   5
  -8   3 -18 1320.09 611.807   5
  -8   3 -19-65.1423 288.955   5
  -8   3 -20-165.132 197.743   5
   8  -4 -24 520.100 341.508   1
   8  -4 -23 370.001 315.165   1
   8   4 -23-10.9453 267.980   5
   8  -4 -22 495.408 357.276   1
   8   4 -22 93.3663 170.124   5
   8  -4 -21 1517.79 604.188   1
   8   4 -21 1112.93 572.542   5
   8   4 -20 4536.83 1165.07   5
   8  -4 -20 2936.79 860.431   1
   8   4 -19 2613.23 860.668   5
   8  -4 -19 923.853 439.286   1
   8   4 -18-116.781 239.456   5
   8  -4 -18 397.141 319.994   1
   8   4 -17 271.991 466.475   5
   8  -4 -17-251.283 94.9831   1
   8   4 -16 5300.06 1133.20   5
   8  -4 -16 2871.28 820.605   1
   8   4 -15 9508.59 1496.06   5
   8  -4 -15 9937.17 1521.57   1
   8  -4 -14 321.535 275.549   1
   8   4 -14 902.364 438.953   5
   8   4 -13 3739.93 866.403   5
   8  -4 -13 3939.67 941.480   1
   8   4 -12 540.904 343.843   5
   8  -4 -12 359.291 270.026   1
   8  -4 -11-168.086 361.834   1
   8   4 -11-167.767 311.421   5
   8  -4 -10-112.155 293.140   1
   8   4 -10-279.139 217.630   5
   8   4  -9-70.6876 131.895   5
   8  -4  -9-272.830 259.399   1
  -8  -4   8 6097.41 1230.71   4
   8   4  -8 4063.19 759.190   5
  -8  -4   7 4044.56 1009.62   4
   8   4  -7 3447.51 665.595   5
  -8  -4   6 467.959 390.824   4
   8   4  -6-25.9808 54.9518   5
  -8  -4   5 163.568 189.290   4
   8   4  -5-35.9500 127.506   5
  -8  -4   4 5702.38 1107.18   4
   8   4  -4 4150.14 573.785   5
  -8  -4   3 11936.8 1578.06   4
  -8  -4   2 7451.37 1233.77   4
  -8  -4   1 130.404 162.216   4
  -8   4   1-163.083 317.048   2
   8  -4   0 154.341 64.9774   4
  -8  -4   0 40.7383 179.889   4
  -8   4   0 68.2117 128.874   2
  -8  -4  -1 5668.34 1078.32   4
  -8   4  -1 6813.21 1028.62   2
  -8   4  -1 7570.06 1294.68   5
   8  -4   1 5492.42 905.580   4
  -8   4  -2 3071.59 672.216   2
   8  -4   2 2500.12 606.647   4
  -8   4  -2 1523.56 515.531   5
  -8  -4  -2 1800.81 599.996   4
   8  -4   3 4962.52 880.071   4
  -8   4  -3 5943.70 1192.93   5
  -8   4  -3 5005.04 821.486   2
   8  -4   4 2608.79 660.963   4
  -8   4  -4 2738.37 588.255   2
  -8   4  -4 2251.08 715.453   5
   8  -4   5 1075.70 420.540   4
  -8   4  -5 1085.59 356.305   2
  -8   4  -5 531.735 334.033   5
  -8   4  -6 6868.04 904.124   2
  -8   4  -6 7588.83 1364.61   5
   8  -4   6 7505.88 1207.38   4
   8  -4   7 390.497 306.682   4
  -8   4  -7 640.327 401.278   5
  -8   4  -8 331.991 99.4400   5
  -8   4  -9-262.051 431.437   5
  -8   4 -10 5343.93 1227.73   5
  -8   4 -11 940.718 518.228   5
  -8   4 -12 318.902 451.353   5
  -8   4 -13 536.496 441.808   5
  -8   4 -14-399.812 415.445   5
  -8   4 -15-245.590 209.052   5
  -8   4 -16 191.430 289.320   5
  -8   4 -17 593.996 542.783   5
   8   5 -21 231.330 312.483   5
   8  -5 -21 768.118 480.555   1
   8  -5 -20 133.147 192.611   1
   8   5 -20-153.348 309.350   5
   8   5 -19-35.6946 120.094   5
   8  -5 -19 168.972 219.838   1
   8  -5 -18-461.375 353.380   1
   8   5 -18-45.2709 138.381   5
   8   5 -17 26.3137 111.557   5
   8  -5 -17-71.2103 180.760   1
   8   5 -16 471.025 378.069   5
   8  -5 -16-127.989 298.692   1
   8   5 -15 1200.18 560.200   5
   8  -5 -15 1609.77 605.062   1
   8  -5 -14 409.344 348.482   1
   8   5 -14 344.475 252.181   5
   8   5 -13 819.837 439.694   5
  -8  -5  12 3270.93 1069.71   4
   8   5 -12 2044.43 673.419   5
  -8  -5  11-142.387 92.7489   4
  -8  -5  10-148.692 268.751   4
  -8  -5   9 3215.29 997.155   4
  -8  -5   8 799.979 469.188   4
  -8  -5   7 882.725 552.579   4
  -8  -5   6 190.748 269.931   4
  -8  -5   5 83.5359 181.076   4
  -8  -5   4 409.219 343.526   4
  -8  -5   3 6599.73 1340.90   4
  -8  -5   2 1357.48 626.500   4
  -8   5   1 10736.2 1538.34   2
  -8   5   1 10768.7 1688.19   5
  -8  -5   1 10919.3 1710.51   4
  -8  -5   0 152.430 141.422   4
  -8   5   0-37.4290 187.389   2
  -8   5   0-82.4889 260.012   5
   8  -5   1 869.948 412.065   4
  -8   5  -1 809.256 422.867   5
  -8  -5  -1 970.594 488.616   4
   8  -5   2 675.275 356.977   4
  -8   5  -2 235.842 157.544   5
   8  -5   3-147.786 84.4390   4
  -8   5  -3-139.252 266.742   5
  -8   5  -4 715.738 409.575   5
  -8   5  -5 862.655 490.023   5
  -8   5  -6 553.228 349.192   5
  -8   5  -7 873.190 441.305   5
  -8   5  -8-198.765 262.489   5
  -8   5  -9 597.619 397.626   5
  -8   5 -10 640.536 572.883   5
  -8   5 -11 411.206 373.064   5
  -8   5 -12 210.040 258.294   5
  -8   5 -13 167.156 298.592   5
  -8   5 -14 1135.29 760.244   5
  -8  -6  14-518.149 422.115   4
  -8  -6  13-483.895 646.738   4
  -8  -6  12-867.671 581.831   4
  -8  -6  11 470.832 378.845   4
  -8  -6  10-57.4317 223.912   4
  -8  -6   9 335.588 337.846   4
  -8  -6   8 142.557 251.909   4
  -8  -6   7-332.109 495.663   4
  -8  -6   6 453.656 426.778   4
  -8  -6   5 498.247 489.187   4
  -8  -6   4-338.272 340.340   4
  -8  -6   3 509.802 322.174   4
  -8  -6   2 303.011 358.459   4
  -8   6   2 28.0147 134.823   5
  -8  -6   1 538.642 317.383   4
  -8   6   1-180.382 147.378   5
  -8   6   0 440.471 334.630   5
  -8  -6   0-194.867 264.927   4
  -8   6  -1 545.974 440.264   5
  -8   6  -2 30.0493 309.724   5
  -8   6  -3 1006.12 523.174   5
  -8   6  -4-264.965 344.420   5
  -8   6  -5 54.8688 158.007   5
  -8   6  -6 584.968 452.528   5
  -8   6  -7 403.184 380.488   5
  -8   6  -8 398.648 357.600   5
  -8   6  -9 51.1910 79.6943   5
  -8   6 -10 181.986 275.495   5
  -8   6 -11-54.7540 263.833   5
   9   0 -28 236.682 318.407   5
  -9   0  28 1615.60 1005.15   3
   9   0 -27 1216.37 626.998   5
  -9   0  27 3700.50 1565.05   3
   9   0 -26 795.373 529.616   5
  -9   0  26 623.437 652.954   3
   9   0 -25-267.700 368.563   5
  -9   0  25 163.081 621.782   3
   9   0 -24-72.9315 171.743   5
   9   0 -23 165.802 299.321   5
   9   0 -22 238.697 173.216   5
   9   0 -21 3825.95 969.325   5
   9   0 -20 638.983 366.907   5
   9   0 -19 2489.22 715.886   5
   9   0 -18-150.918 264.248   5
   9   0 -17 5656.51 1056.73   5
   9   0 -16-48.2015 181.142   5
   9   0 -15 10004.3 1328.18   5
   9   0 -14-80.8933 171.517   5
   9   0 -13 1915.14 550.913   5
   9   0 -12-14.6432 132.556   5
   9   0 -11 5073.89 840.457   5
  -9   0  11 3826.73 638.968   3
  -9   0  10 194.582 208.623   3
  -9   0   9 134.743 194.386   3
  -9   0   8 325.340 202.951   3
  -9   0   7 12549.4 1005.09   3
  -9   0   6-102.707 177.176   3
  -9   0   5 5566.57 774.449   2
  -9   0   5 5192.83 569.730   3
   9   0  -4 126.604 120.205   3
  -9   0   4-103.077 90.7803   2
  -9   0   3 46179.8 2198.24   2
   9   0  -3 47211.7 1870.38   1
   9   0  -2-12.2893 43.7158   1
  -9   0   2 25.8227 44.2955   4
   9   0  -2-128.956 110.551   3
  -9   0   1 17049.9 1289.98   2
   9   0  -1 16187.7 1071.07   1
  -9   0   1 15690.1 785.217   4
  -9   0   0 138.876 147.465   2
  -9   0  -1 19486.6 1413.86   2
  -9   0  -1 18706.3 1138.15   1
   9   0   1 17132.8 961.082   4
   9   0   2 14.4485 33.6611   4
  -9   0  -2 155.536 117.769   2
  -9   0  -2-28.6320 87.9707   1
  -9   0  -3 121914. 3711.57   2
   9   0   3 113827. 2920.45   4
  -9   0  -4-74.8566 85.6560   2
  -9   0  -5 25367.1 1753.20   5
  -9   0  -5 29030.7 1911.17   2
  -9   0  -6 307.477 238.711   2
  -9   0  -6-28.7293 172.290   5
  -9   0  -7 18722.4 1575.29   5
  -9   0  -7 20311.4 1739.59   2
  -9   0  -8-5.24942 186.111   2
  -9   0  -8-762.554 328.644   5
  -9   0  -9 8276.94 1116.78   5
  -9   0  -9 9034.16 1254.29   2
  -9   0 -10 80.7987 61.5888   5
  -9   0 -10 299.976 292.574   2
  -9   0 -11 471.133 282.458   5
  -9   0 -11 1034.78 487.931   2
  -9   0 -12-196.112 268.830   2
  -9   0 -12-190.955 188.122   5
  -9   0 -13 4010.52 885.703   5
  -9   0 -14-309.533 173.271   5
  -9   0 -15 601.784 414.640   5
  -9   0 -16 144.366 319.122   5
  -9   0 -17 1101.78 526.925   5
  -9   0 -18-61.6581 200.442   5
  -9   0 -19 16.5866 243.108   5
  -9   0 -20-181.293 292.274   5
  -9   0 -21 225.833 292.019   5
  -9   0 -22-447.558 390.368   5
  -9   0 -23-42.4377 121.946   5
   9  -1 -28 89.5346 233.622   5
   9  -1 -27-149.376 292.216   5
  -9  -1  27 9.81806 401.239   3
   9   1 -26 456.594 124.288   5
   9  -1 -26 405.764 335.692   5
   9   1 -25-89.2283 175.542   5
  -9  -1  25 1027.36 692.976   3
   9  -1 -25 1187.72 631.872   5
   9   1 -24-4.25519 170.326   5
   9  -1 -24 65.8986 112.373   5
   9  -1 -23 869.953 523.651   5
   9   1 -23 458.332 374.356   5
  -9  -1  23 740.851 522.423   3
   9  -1 -22 3611.53 948.252   5
   9   1 -22 4643.78 1080.70   5
   9  -1 -21 738.174 443.091   5
   9   1 -21 1270.91 502.430   5
  -9  -1  21 2015.36 775.016   3
   9  -1 -20 988.798 441.684   5
   9   1 -20 1458.41 555.660   5
  -9  -1  20 2061.80 820.379   3
   9  -1 -19 6821.30 1235.82   5
   9   1 -19 5433.10 1151.66   5
   9  -1 -18 3362.07 846.603   5
   9   1 -18 3910.81 894.740   5
   9   1 -17 1598.78 591.978   5
  -9  -1  17 1675.48 638.662   3
   9  -1 -17 1238.85 539.525   5
   9   1 -16 10458.9 1404.87   5
  -9  -1  16 13062.7 1591.04   3
   9   1 -15 267.711 332.724   5
  -9  -1  15-293.117 351.985   3
  -9  -1  14 1841.53 588.010   3
   9   1 -14 716.907 369.934   5
   9   1 -13 318.504 271.989   5
  -9  -1  13 269.391 302.315   3
   9   1 -12 6041.17 959.848   5
  -9  -1  12 7052.28 1028.87   3
   9   1 -11 109.306 196.037   5
  -9  -1  11 25.7513 174.172   3
   9   1 -10 17365.7 1516.53   5
  -9  -1  10 16900.2 1482.59   3
  -9  -1   9 64247.5 2838.96   3
   9   1  -9 61109.7 2726.95   5
  -9  -1   8 76043.5 2845.90   2
  -9  -1   8 75576.0 2985.00   3
   9   1  -8 71458.5 2879.80   5
  -9  -1   7 7370.63 856.523   2
  -9  -1   7 8611.01 955.237   3
  -9  -1   6 14057.0 1144.84   2
  -9  -1   5 1324.13 345.332   2
  -9  -1   4 282.046 171.503   2
  -9  -1   3 1063.61 292.533   4
  -9   1   3 1504.85 177.730   3
  -9   1   3 1424.35 390.605   2
  -9  -1   3 1664.79 373.337   2
  -9   1   2 26166.7 1706.97   2
  -9  -1   2 27895.8 1586.04   2
  -9  -1   2 26666.4 1502.60   4
  -9   1   1 17232.7 1376.27   2
  -9  -1   1 15994.9 1262.00   2
  -9  -1   1 15657.2 1160.58   4
  -9  -1   0 711.199 225.966   4
  -9  -1   0 474.425 216.752   2
   9   1   0 884.378 175.153   1
  -9   1   0 1022.77 349.766   2
  -9  -1  -1 15851.6 1310.08   2
  -9   1  -1 16676.3 1339.89   2
  -9  -1  -2 64.4255 87.0094   2
   9  -1   2 3.35056 28.2063   3
  -9   1  -2-36.0531 63.0642   2
   9  -1   3 5749.11 468.246   3
  -9  -1  -3 4958.02 808.314   2
  -9   1  -3 5438.61 772.334   2
  -9   1  -4 6488.73 866.550   2
  -9  -1  -4 7154.19 791.447   5
  -9  -1  -4 6672.52 402.009   1
  -9  -1  -4 7686.67 1007.04   2
  -9  -1  -5 69353.4 2555.72   5
  -9   1  -5 75718.2 3318.50   5
  -9  -1  -5 76083.8 3328.32   2
  -9   1  -5 72212.4 2980.02   2
  -9  -1  -5 64137.0 1477.98   1
  -9  -1  -6 1883.16 422.338   5
  -9   1  -6 2145.23 550.024   2
  -9   1  -6 2476.71 620.520   5
  -9  -1  -6 1725.18 518.748   2
  -9   1  -7 313.470 170.020   2
  -9  -1  -7 108.598 100.643   5
  -9   1  -7 16.5509 238.565   5
  -9   1  -8 696.964 363.606   2
  -9   1  -8 327.212 139.015   5
  -9  -1  -8 387.433 237.438   5
  -9  -1  -8 217.756 211.202   2
  -9   1  -9 673.510 309.725   2
  -9   1  -9 627.414 288.321   5
  -9  -1  -9 1080.35 438.757   2
  -9  -1 -10 4767.72 996.002   2
  -9  -1 -10 4202.60 761.957   5
  -9   1 -10 3933.52 838.270   5
  -9   1 -10 4239.38 844.867   2
  -9  -1 -11 4782.60 842.541   5
  -9   1 -11 5291.57 1028.12   5
  -9   1 -11 5607.20 1007.40   2
  -9  -1 -12 1077.80 413.057   5
  -9   1 -12 1198.57 463.750   2
  -9  -1 -13 15599.3 1606.22   5
  -9   1 -13 18038.0 1990.43   5
  -9   1 -13 18258.9 1930.41   2
  -9  -1 -14 3382.02 792.933   5
  -9   1 -14 3935.52 946.031   5
  -9  -1 -15 1773.49 572.870   5
  -9   1 -15 872.541 424.525   5
  -9  -1 -16 392.003 346.241   5
  -9   1 -16 234.611 238.695   5
  -9  -1 -17 1727.01 607.147   5
  -9   1 -17 1107.73 490.365   5
  -9  -1 -18 3785.04 918.029   5
  -9   1 -18 3901.29 1045.43   5
  -9  -1 -19 269.199 229.070   5
  -9   1 -19 290.395 316.684   5
  -9   1 -20 366.035 294.552   5
  -9   1 -21-46.0296 284.126   5
   9  -1  21-705.502 745.351   3
  -9   1 -22 123.566 264.555   5
  -9   1 -23 106.488 202.793   5
   9   2 -26 1078.49 612.207   5
  -9  -2  26 726.530 586.984   3
  -9  -2  25-259.194 490.858   3
   9   2 -25 305.890 290.432   5
   9   2 -24-238.197 432.380   5
  -9  -2  24-100.603 329.925   3
   9   2 -23 168.546 94.2588   5
  -9  -2  23-54.0309 322.389   3
   9   2 -22 1365.07 638.985   5
  -9  -2  22 1209.81 694.339   3
   9   2 -21 6929.43 1379.25   5
  -9  -2  21 7568.91 1431.38   3
  -9  -2  20 4214.22 989.129   3
   9   2 -20 5454.47 1191.08   5
   9   2 -19 6092.84 1243.40   5
  -9  -2  19 5638.36 1179.97   3
   9   2 -18 150.774 124.395   5
  -9  -2  18 136.615 293.369   3
   9   2 -17 9238.95 1426.22   5
  -9  -2  17 8482.31 1384.21   3
  -9  -2  16 868.548 535.519   3
   9   2 -16 764.125 459.446   5
   9   2 -15 372.930 352.736   5
  -9  -2  15 771.974 405.624   3
  -9  -2  14 4329.35 975.865   3
   9   2 -14 5711.34 1042.76   5
  -9  -2  13 5954.92 1078.13   3
   9   2 -13 6057.99 1017.84   5
  -9  -2  12 3212.16 769.593   3
  -9  -2  12 2926.13 519.150   2
   9   2 -12 3417.80 771.236   5
  -9  -2  11 9900.32 932.730   2
  -9  -2  11 11042.4 1385.55   3
   9   2 -11 10888.1 1275.17   5
  -9  -2  10 6857.47 749.044   2
   9   2 -10 6561.54 949.254   5
   9   2  -9 771.686 302.485   5
  -9  -2   9 538.918 192.093   2
   9   2  -8 10780.0 1132.66   5
  -9  -2   8 9618.55 850.721   2
  -9  -2   7 1248.74 309.571   2
   9   2  -7 1552.99 417.206   5
   9   2  -6 9664.32 978.690   5
  -9  -2   6 10368.1 890.410   2
  -9  -2   5 6260.06 715.843   2
  -9  -2   4 3562.22 676.994   4
  -9  -2   4 3628.57 546.761   2
  -9   2   4 3897.81 525.054   4
  -9  -2   3 35921.8 1817.60   2
  -9   2   3 35792.3 1461.55   4
  -9  -2   3 34894.0 2085.48   4
  -9  -2   2 21670.6 1447.97   2
  -9   2   2 22330.9 1738.28   2
  -9  -2   2 19550.5 1268.47   5
  -9  -2   2 22831.1 1691.43   4
  -9   2   1 13029.5 1273.90   2
  -9   2   1 10982.8 648.911   3
  -9  -2   1 12377.7 934.306   5
  -9  -2   1 13666.5 1314.34   4
  -9  -2   1 12699.2 1173.89   2
  -9   2   0 15242.2 1374.51   2
  -9  -2   0 12448.9 872.995   5
  -9   2   0 12488.3 666.354   3
  -9  -2   0 15148.1 1322.79   2
  -9  -2   0 13369.0 1296.74   4
  -9  -2  -1 212004. 5166.61   2
  -9  -2  -1 220945. 5331.48   4
   9  -2   1 209869. 2968.63   4
  -9   2  -1 220645. 5110.00   2
  -9   2  -2 52910.3 2486.86   2
  -9  -2  -2 52499.3 2694.31   2
   9  -2   2 51947.8 1682.66   4
  -9   2  -3 63.8224 110.438   2
  -9  -2  -3 311.920 118.046   5
  -9  -2  -3 324.916 209.302   2
  -9   2  -4 2495.84 549.462   2
  -9  -2  -4 1324.41 265.463   5
  -9  -2  -4 1368.88 475.057   2
  -9   2  -4 1863.30 577.930   5
  -9  -2  -5 4140.17 507.643   5
  -9   2  -5 5233.07 803.476   2
  -9  -2  -5 3319.48 742.369   2
  -9   2  -5 4709.51 918.100   5
   9  -2   6 1466.16 370.909   3
  -9   2  -6 980.883 338.908   2
  -9  -2  -6 1001.81 264.550   5
  -9  -2  -6 1212.06 475.978   2
  -9   2  -6 877.938 373.044   5
  -9   2  -7 1232.38 464.098   5
  -9   2  -7 2092.28 533.382   2
  -9  -2  -7 1562.50 340.722   5
   9  -2   7 1704.72 431.058   3
  -9   2  -8 570.884 279.938   2
   9  -2   8 755.211 222.250   3
  -9  -2  -8 301.137 171.534   5
  -9   2  -8-105.680 335.358   5
  -9   2  -9 366.776 217.905   2
   9  -2   9 499.341 293.748   3
  -9  -2  -9 150.049 120.863   5
  -9   2  -9 302.727 208.719   5
  -9   2 -10 2719.17 678.913   5
  -9   2 -10 3061.36 675.284   2
   9  -2  10 3541.16 746.084   3
  -9  -2 -10 2706.09 539.921   5
   9  -2  11 152.782 230.569   3
  -9  -2 -11 329.408 223.964   5
  -9   2 -11-180.226 234.671   5
  -9   2 -11 209.605 70.3192   2
   9  -2  12 535.792 368.999   3
  -9  -2 -12 538.811 298.724   5
  -9   2 -12 483.863 440.396   5
  -9   2 -12 323.479 221.505   2
   9  -2  13 5879.53 1131.07   3
  -9   2 -13 4303.71 1046.48   5
  -9   2 -13 4069.33 880.467   2
   9  -2  14 151.269 294.272   3
  -9   2 -14 238.798 165.459   2
  -9   2 -14 408.984 326.967   5
   9  -2  15 161.331 227.683   3
  -9   2 -15 129.730 220.516   5
  -9   2 -16 63.2193 201.283   5
   9  -2  16 59.1764 402.678   3
   9  -2  17 6009.11 1478.92   3
  -9   2 -17 2950.54 931.551   5
  -9   2 -18-64.7088 255.384   5
  -9   2 -19 304.623 279.357   5
  -9   2 -20-138.278 154.215   5
  -9   2 -21 66.5396 121.148   5
  -9  -3  25-27.3324 405.766   3
   9   3 -25 475.660 393.440   5
  -9  -3  24-177.651 288.819   3
   9   3 -24-99.0680 389.472   5
   9   3 -23 1282.21 602.061   5
  -9  -3  23 669.967 411.552   3
  -9  -3  22-219.146 336.721   3
   9   3 -22-15.2974 104.952   5
  -9  -3  21 4802.77 1198.78   3
   9   3 -21 5902.24 1310.94   5
   9   3 -20 693.677 464.386   5
  -9  -3  20-162.903 188.576   3
   9   3 -19 162.179 247.394   5
  -9  -3  19 184.532 190.696   3
   9  -3 -19-254.728 129.424   1
   9   3 -18 17947.0 2129.23   5
  -9  -3  18 21709.6 2420.64   3
   9  -3 -18 23122.9 2337.52   1
   9  -3 -17 9745.04 1506.24   1
   9   3 -17 9005.70 1486.88   5
  -9  -3  17 8429.16 1486.60   3
  -9  -3  16 32267.9 2888.43   3
   9   3 -16 38842.2 2955.63   5
   9  -3 -16 36889.2 2856.61   1
   9   3 -15 17974.7 1966.17   5
   9  -3 -15 16596.4 1907.78   1
   9   3 -14 11039.6 1485.93   5
   9  -3 -14 11340.3 1541.99   1
   9   3 -13 13048.5 1578.25   5
   9  -3 -13 11826.1 1553.83   1
   9   3 -12 12565.4 1472.64   5
   9  -3 -12 12564.7 1597.02   1
   9   3 -11 1588.39 521.844   5
   9  -3 -11 863.266 406.789   1
   9   3 -10 6240.72 977.981   5
  -9  -3  10 6107.56 570.244   2
   9  -3 -10 6748.94 1160.37   1
  -9  -3   9 1295.25 265.583   2
   9  -3  -9 1900.48 613.469   1
   9   3  -9 1967.23 506.690   5
  -9  -3   8-1.24108 51.1843   2
   9   3  -8 96.3269 86.9709   5
   9  -3  -8 143.402 201.869   1
  -9  -3   7 121.576 104.720   2
   9  -3  -7 78.5972 108.895   1
   9   3  -7 8.86574 73.1294   5
  -9  -3   6 1357.95 345.709   2
  -9  -3   6 2529.06 720.423   4
   9   3  -6 1219.06 350.586   5
   9  -3  -6 2158.96 652.453   1
  -9  -3   5 5114.58 964.107   4
   9   3  -5 4414.07 641.566   5
  -9  -3   5 4213.99 628.412   2
  -9  -3   4 463.921 208.768   4
  -9  -3   4 729.347 262.240   2
  -9  -3   3 3320.27 783.354   4
  -9  -3   3 1814.49 377.840   5
  -9  -3   3 3158.43 590.485   2
  -9  -3   2 567.585 305.245   4
  -9  -3   2 198.104 98.5469   5
  -9  -3   2 360.525 195.656   2
  -9  -3   1 819.061 366.458   4
  -9  -3   1 352.520 112.449   5
  -9   3   1 817.288 332.672   2
  -9  -3   1 660.924 248.635   2
  -9   3   0 6728.58 970.364   2
  -9  -3   0 5486.26 887.738   2
   9  -3   0 5009.49 676.106   4
  -9  -3   0 6415.42 1030.99   4
  -9  -3  -1 4923.73 931.935   4
  -9   3  -1 4731.02 804.697   2
  -9  -3  -1 5226.12 903.169   2
   9   3   1 4143.75 425.608   1
   9  -3   1 5171.22 683.760   4
  -9  -3  -2 23097.5 2012.67   4
  -9   3  -2 24935.0 1821.83   2
   9  -3   2 23340.7 1535.56   4
  -9   3  -3 5928.24 925.395   2
  -9   3  -3 7340.77 1273.10   5
   9  -3   3 5917.23 839.535   4
   9  -3   4 3124.43 605.561   4
  -9   3  -4 3421.84 834.700   5
  -9   3  -4 3064.48 611.285   2
  -9   3  -5 966.176 329.857   2
  -9   3  -5 1471.01 609.548   5
  -9   3  -6 4712.22 769.428   2
  -9   3  -6 5270.16 1075.50   5
  -9   3  -7 573.937 302.288   2
  -9   3  -7 1413.77 507.754   5
  -9   3  -8 306.144 261.064   2
  -9   3  -8-233.793 356.588   5
  -9   3  -9 319.096 216.480   2
  -9   3  -9-360.075 495.259   5
  -9   3 -10 73.9581 188.646   2
  -9   3 -10-499.481 432.192   5
  -9   3 -11 1429.36 435.756   2
   9  -3  11 856.004 386.148   3
  -9   3 -11 1475.72 613.096   5
   9  -3  12 5791.10 1124.48   3
  -9   3 -12 4900.26 1178.52   5
  -9   3 -12 3453.29 755.543   2
  -9   3 -13-5.59447 67.3267   2
  -9   3 -13-153.096 239.819   5
  -9   3 -14-175.420 359.770   5
  -9   3 -15 341.073 268.891   5
  -9   3 -16 263.271 277.935   5
  -9   3 -17 118.925 267.588   5
  -9   3 -18-294.741 467.606   5
  -9   3 -19 1360.96 688.544   5
   9  -4 -25 597.638 404.536   1
   9  -4 -24 139.032 203.045   1
   9   4 -23 488.020 464.807   5
   9  -4 -23 213.676 159.232   1
   9  -4 -22 143.795 198.306   1
   9   4 -22-20.7438 274.385   5
   9   4 -21 1231.94 623.806   5
   9  -4 -21 695.107 441.311   1
   9  -4 -20 212.178 229.994   1
   9   4 -20 572.365 461.918   5
   9   4 -19 1342.23 619.527   5
   9  -4 -19 524.978 393.375   1
   9   4 -18-220.562 322.981   5
   9  -4 -18 342.781 236.793   1
   9  -4 -17 98.5249 143.746   1
   9   4 -17 591.308 437.645   5
   9   4 -16 2238.97 740.230   5
   9  -4 -16 1687.72 634.035   1
   9  -4 -15 915.154 528.709   1
   9   4 -15 1224.55 559.481   5
   9  -4 -14 647.244 368.477   1
   9   4 -14 627.119 397.289   5
   9   4 -13 6846.07 1188.71   5
   9  -4 -13 5196.29 1094.32   1
   9   4 -12 237.210 215.127   5
   9  -4 -12 190.694 252.971   1
   9  -4 -11 413.189 237.804   1
   9   4 -11 972.282 431.355   5
   9  -4 -10 4794.31 1030.72   1
   9   4 -10 4712.64 876.092   5
  -9  -4   9 109.333 387.943   4
   9   4  -9 647.048 314.096   5
   9  -4  -9 640.555 330.259   1
  -9  -4   8 8532.64 1456.99   4
   9   4  -8 7000.44 970.150   5
  -9  -4   7 2185.16 757.296   4
   9   4  -7 1414.75 411.623   5
  -9  -4   6 24.7575 113.794   4
   9   4  -6 24.4785 60.7988   5
   9   4  -5 19005.8 1337.44   5
  -9  -4   5 18679.0 2071.23   4
  -9  -4   4 48.7889 260.240   4
  -9  -4   3 3261.72 819.559   4
  -9  -4   2 12440.0 1643.79   4
  -9  -4   1 204.819 221.049   4
  -9   4   1-1131.85 464.394   2
  -9   4   0 29200.0 2251.91   2
   9  -4   0 25726.3 1882.16   4
  -9  -4   0 26921.3 2393.21   4
  -9   4  -1 10557.7 1316.78   2
  -9  -4  -1 7369.45 1283.73   4
   9  -4   1 8355.22 1082.86   4
   9  -4   2 211.182 107.924   4
  -9   4  -2 420.199 383.982   5
  -9   4  -2-73.2385 177.707   2
   9  -4   3 1801.76 516.323   4
  -9   4  -3 1681.02 494.041   2
  -9   4  -3 2117.71 702.448   5
  -9   4  -4 3098.62 651.934   2
   9  -4   4 2967.39 699.222   4
  -9   4  -4 3046.92 856.518   5
   9  -4   5 1837.19 559.596   4
  -9   4  -5 1246.36 394.656   2
  -9   4  -5 776.969 436.984   5
   9  -4   6 449.026 283.253   4
  -9   4  -6 672.817 308.369   2
  -9   4  -6 1304.27 573.642   5
  -9   4  -7 2097.59 737.073   5
  -9   4  -8-142.085 139.949   5
  -9   4  -9-219.929 505.591   5
  -9   4 -10 2213.59 796.134   5
  -9   4 -11 518.699 373.977   5
  -9   4 -12 629.811 449.546   5
  -9   4 -13 707.869 423.369   5
  -9   4 -14 408.326 424.545   5
  -9   4 -15 957.994 589.225   5
  -9   4 -16 810.153 564.223   5
   9   5 -21 359.226 258.388   5
   9  -5 -21 125.698 201.751   1
   9   5 -20 5.46934 123.345   5
   9  -5 -20 67.7294 108.410   1
   9   5 -19 238.240 279.510   5
   9  -5 -19-229.147 262.382   1
   9  -5 -18 109.921 152.420   1
   9   5 -18 53.8308 209.514   5
   9   5 -17 1325.69 598.363   5
   9  -5 -17 932.828 514.879   1
   9   5 -16 110.684 144.631   5
   9  -5 -16 108.009 122.712   1
   9   5 -15 993.091 516.850   5
   9  -5 -15 199.997 137.889   1
   9  -5 -14 2572.65 835.932   1
   9   5 -14 2341.18 714.726   5
  -9  -5  13 521.837 399.200   4
   9   5 -13 727.360 419.992   5
  -9  -5  12 93.5464 209.244   4
  -9  -5  11 601.494 423.048   4
  -9  -5  10 955.864 544.579   4
  -9  -5   9 1612.90 717.335   4
  -9  -5   8 163.364 162.747   4
  -9  -5   7 205.845 165.754   4
  -9  -5   6 249.587 210.509   4
  -9  -5   5 158.730 350.000   4
  -9  -5   4 75.4513 325.580   4
  -9  -5   3 354.336 391.018   4
  -9  -5   2 1585.48 669.634   4
  -9   5   2 2769.50 832.360   2
  -9  -5   1 367.992 259.371   4
  -9   5   1 823.414 406.992   2
  -9   5   1 736.560 422.498   5
  -9  -5   0 1678.92 673.822   4
  -9   5   0 1623.94 597.972   2
  -9   5   0 1034.93 604.946   5
  -9   5  -1 455.239 353.679   5
  -9  -5  -1 355.670 414.078   4
  -9   5  -2 228.965 262.867   5
  -9   5  -3 110.115 179.440   5
  -9   5  -4 107.327 113.124   5
  -9   5  -5-193.698 260.142   5
  -9   5  -6 2952.07 948.914   5
  -9   5  -7-56.2324 148.434   5
  -9   5  -8 118.240 328.122   5
  -9   5  -9 733.248 401.524   5
  -9   5 -10 84.2238 111.751   5
  -9   5 -11 577.506 500.306   5
  -9   5 -12 334.906 397.798   5
  -9   5 -13 186.424 256.713   5
  -9  -6  13 74.0431 101.778   4
  -9  -6  12 333.642 333.316   4
  -9  -6  11 1588.10 779.525   4
  -9  -6  10 666.310 495.910   4
  -9  -6   9 235.364 403.066   4
  -9  -6   8 137.758 309.585   4
  -9  -6   7 4653.09 1352.56   4
  -9  -6   6 241.803 357.116   4
  -9  -6   5 664.575 505.194   4
  -9  -6   4-394.175 329.369   4
  -9  -6   3 978.069 603.097   4
  -9   6   3 287.860 167.255   5
  -9  -6   2 141.390 318.284   4
  -9   6   2 282.095 225.792   5
  -9  -6   1 11.4753 195.128   4
  -9   6   1 287.905 420.362   5
  -9   6   0-88.5098 292.807   5
  -9  -6   0 658.859 474.219   4
  -9   6  -1-61.2921 177.691   5
  -9   6  -2 557.896 481.018   5
  -9   6  -3 534.627 430.595   5
  -9   6  -4 705.341 542.250   5
  -9   6  -5 271.213 297.491   5
  -9   6  -6 88.9120 265.422   5
  -9   6  -7 634.117 402.716   5
  -9   6  -8 663.020 537.328   5
  -9   6  -9 360.498 414.014   5
  -9   6 -10 613.421 468.827   5
  10   0 -28-206.049 149.232   5
 -10   0  28 169.685 659.791   3
  10   0 -27-121.931 197.902   5
 -10   0  27-868.116 779.024   3
  10   0 -26 297.421 301.543   5
 -10   0  26-545.973 265.215   3
  10   0 -25 613.274 534.087   5
 -10   0  25 395.565 621.876   3
  10   0 -24 1609.79 722.918   5
 -10   0  24 1337.06 920.832   3
  10   0 -23 160.484 330.962   5
 -10   0  23 1644.80 902.288   3
  10   0 -22 6315.79 1286.95   5
 -10   0  22 9669.84 1801.28   3
  10   0 -21 119.506 289.324   5
  10   0 -20 1749.63 681.281   5
  10   0 -19-83.4788 135.251   5
  10   0 -18 2847.98 775.467   5
  10   0 -17 652.140 460.746   5
  10   0 -16 10422.1 1430.67   5
  10   0 -15 266.724 359.525   5
 -10   0  15-186.306 121.499   3
 -10   0  14 56947.2 2900.95   3
  10   0 -14 54556.6 3081.01   5
  10   0 -13-46.8738 159.601   5
 -10   0  13 177.015 207.779   3
 -10   0  12 4005.45 739.798   3
 -10   0  11 278.393 315.649   3
 -10   0  10 42438.6 2121.89   3
 -10   0   9 78.0661 145.122   3
 -10   0   8 45695.9 2058.65   3
 -10   0   7 17.1971 117.618   3
 -10   0   6 100250. 2734.30   3
 -10   0   6 98388.5 3483.09   2
 -10   0   5-75.1337 46.1705   3
 -10   0   5 415.633 260.386   2
 -10   0   4 1676.55 466.293   2
  10   0  -4 1001.08 231.849   3
  10   0  -3 24.9123 165.953   1
  10   0  -3 57.7344 46.1625   3
  10   0  -2 12543.1 801.080   3
  10   0  -2 13875.2 1046.27   1
 -10   0   2 13256.2 1220.47   2
 -10   0   2 11979.9 749.575   4
  10   0  -1 4.09465 67.9380   1
 -10   0   1 56.6358 133.960   2
 -10   0   1 41.7947 44.0799   4
 -10   0   0 12701.7 1160.20   2
  10   0   1-34.4641 81.4469   4
 -10   0  -1-68.8338 157.535   2
 -10   0  -2 39302.4 2153.42   2
  10   0   2 33213.8 1511.31   4
  10   0   3 28.0586 22.0736   4
 -10   0  -3 31.0500 132.067   2
 -10   0  -4 7932.61 1000.70   2
 -10   0  -5-173.214 110.948   2
 -10   0  -5 2064.53 545.506   5
 -10   0  -6 8407.26 1056.51   5
 -10   0  -6 10088.0 1204.12   2
 -10   0  -7 50.5374 120.348   2
 -10   0  -7 101.003 203.310   5
 -10   0  -8 6505.81 970.470   5
 -10   0  -8 8232.22 1178.56   2
 -10   0  -9-118.008 161.670   5
 -10   0  -9 39.9910 125.376   2
 -10   0 -10 7911.32 1172.10   5
 -10   0 -10 9106.03 1356.78   2
 -10   0 -11 49.1657 177.043   2
 -10   0 -11 196.560 258.488   5
 -10   0 -12 4479.43 908.733   5
 -10   0 -12 4690.02 1021.93   2
 -10   0 -13 239.473 388.230   2
 -10   0 -13 110.133 207.226   5
 -10   0 -14 3526.90 851.788   5
 -10   0 -15 275.613 425.459   5
 -10   0 -16 31774.0 2720.79   5
 -10   0 -17 108.021 142.524   5
 -10   0 -18 2491.27 789.125   5
 -10   0 -19-6.80763 174.453   5
 -10   0 -20-104.160 181.298   5
 -10   0 -21-391.213 445.721   5
 -10   0 -22 41.3468 56.7198   5
 -10   0 -23-119.384 202.028   5
  10  -1 -28 388.686 370.114   5
  10  -1 -27 1787.83 756.255   5
 -10  -1  27 1046.99 793.141   3
  10   1 -27 1045.10 613.738   5
  10  -1 -26 143.671 284.843   5
  10   1 -26 222.388 377.749   5
 -10  -1  26 379.068 504.883   3
  10   1 -25 64.4828 326.280   5
 -10  -1  25 882.202 750.779   3
  10  -1 -25 46.0372 376.311   5
  10  -1 -24 193.487 298.617   5
  10   1 -24 200.448 238.378   5
 -10  -1  24 267.725 283.142   3
  10  -1 -23 2134.39 763.146   5
  10   1 -23 1514.15 625.802   5
 -10  -1  23 2749.96 978.937   3
  10   1 -22 449.064 360.618   5
  10  -1 -22-134.458 75.9739   5
 -10  -1  22 847.435 607.656   3
  10   1 -21 741.369 424.792   5
  10  -1 -21 1032.63 497.349   5
 -10  -1  21 1848.87 667.949   3
  10   1 -20-69.0457 87.0085   5
  10  -1 -20 127.853 150.874   5
 -10  -1  19 12806.6 1784.72   3
  10   1 -19 10460.9 1552.62   5
 -10  -1  18 443.767 309.108   3
  10   1 -18 171.913 197.670   5
  10   1 -17 1135.69 489.623   5
 -10  -1  17 2662.59 780.874   3
  10   1 -16 5767.77 1055.34   5
 -10  -1  16 6298.93 1103.91   3
  10   1 -15 1315.23 529.481   5
 -10  -1  15 608.060 383.131   3
  10   1 -14 270.969 234.733   5
 -10  -1  14 197.717 148.376   3
  10   1 -13 629.036 352.767   5
 -10  -1  13 762.260 420.402   3
 -10  -1  12 20309.8 1743.60   3
  10   1 -12 17329.2 1650.14   5
 -10  -1  11 6402.17 946.694   3
  10   1 -11 6861.63 986.161   5
  10   1 -10 19453.9 1649.88   5
 -10  -1  10 20940.6 1690.99   3
  10   1  -9 38876.4 2256.34   5
 -10  -1   9 38063.4 2160.43   2
 -10  -1   9 39367.6 2276.58   3
 -10  -1   8 26200.7 1735.95   2
 -10  -1   8 29166.8 1899.49   3
 -10  -1   7 751.355 273.156   2
 -10  -1   6 80511.0 2896.84   2
 -10  -1   5 7741.14 892.436   2
 -10   1   4 2859.09 296.611   3
 -10   1   4 2546.17 584.924   2
 -10  -1   4 2551.49 490.359   2
 -10   1   3 20665.0 1608.57   2
 -10  -1   3 19606.9 1404.74   2
  10  -1  -3 19795.4 1501.57   1
 -10  -1   3 17646.6 1251.64   4
  10  -1  -2 127549. 3861.66   1
 -10   1   2 134221. 4023.38   2
 -10  -1   2 126051. 3615.48   2
 -10  -1   2 125660. 3353.51   4
 -10   1   1 59457.0 2662.93   2
 -10  -1   1 56767.8 2241.77   4
 -10  -1   1 59128.3 2534.89   2
  10   1  -1 56996.2 1670.24   1
 -10  -1   0 1592.33 359.592   4
 -10  -1   0 1689.87 469.849   2
  10   1   0 1736.34 270.223   1
 -10   1   0 1520.95 461.190   2
 -10  -1  -1 893.429 329.650   2
 -10   1  -1 1307.97 404.430   2
  10  -1   2 56685.2 1163.77   3
 -10  -1  -2 56889.0 2690.66   2
 -10   1  -2 57696.7 2609.23   2
  10  -1   2 51278.6 1112.54   4
  10  -1   3 24527.3 958.830   3
 -10  -1  -3 23992.9 1773.48   2
 -10   1  -3 24474.1 1725.72   2
 -10  -1  -4 177.334 263.412   2
 -10   1  -4 249.321 193.787   2
 -10  -1  -4 116.493 109.191   5
 -10   1  -5 14736.4 1411.63   2
 -10  -1  -5 16470.7 1306.61   5
 -10  -1  -5 17237.5 1615.15   2
 -10  -1  -5 13930.6 693.966   1
 -10   1  -5 16931.5 1625.22   5
 -10  -1  -6 1643.45 500.516   2
 -10  -1  -6 1251.14 228.235   1
 -10   1  -6 2339.05 575.469   2
 -10  -1  -6 1472.36 382.042   5
 -10   1  -6 867.296 367.952   5
 -10   1  -7 2892.32 630.266   2
 -10  -1  -7 2637.56 554.849   5
 -10   1  -7 3346.37 756.855   5
 -10  -1  -7 2780.28 691.138   2
 -10   1  -8 319.878 266.941   5
 -10  -1  -8 246.114 238.159   2
 -10   1  -9 4923.98 897.365   2
 -10  -1  -9 4939.46 813.545   5
 -10   1  -9 4622.34 896.643   5
 -10  -1  -9 4555.18 941.224   2
 -10   1 -10 5120.19 922.476   2
 -10   1 -10 5178.59 1027.17   5
 -10  -1 -10 4878.61 842.281   5
 -10  -1 -10 5208.84 1098.33   2
 -10  -1 -11 11820.3 1339.54   5
 -10   1 -11 12125.2 1585.08   5
 -10   1 -11 12245.0 1539.54   2
 -10  -1 -12 6174.73 993.409   5
 -10   1 -12 6284.54 1156.22   5
 -10   1 -12 5286.68 1020.99   2
 -10  -1 -13 658.978 338.240   5
 -10   1 -13 1128.80 517.841   5
 -10   1 -13 781.707 436.625   2
 -10  -1 -14 2050.05 591.825   5
 -10   1 -14 2450.17 739.130   2
 -10   1 -14 1798.77 709.454   5
 -10  -1 -15 1790.96 605.432   5
 -10   1 -15 841.534 459.563   5
 -10  -1 -16 924.326 433.291   5
 -10   1 -16 1110.56 535.562   5
 -10  -1 -17 3436.38 853.109   5
 -10   1 -17 3033.94 894.605   5
 -10  -1 -18 1003.85 501.684   5
 -10   1 -18 1249.34 581.293   5
 -10   1 -19 308.525 352.572   5
 -10   1 -20 311.566 236.361   5
 -10   1 -21-44.4273 263.868   5
 -10   1 -22-207.350 304.505   5
  10   2 -26-259.144 296.722   5
 -10  -2  26-511.267 472.751   3
 -10  -2  25 809.210 569.598   3
  10   2 -25 381.502 371.809   5
  10   2 -24 246.824 188.332   5
 -10  -2  24 62.1118 339.961   3
  10   2 -23 5165.81 1210.66   5
 -10  -2  23 5144.77 1325.46   3
 -10  -2  22 3461.70 1031.94   3
  10   2 -22 2857.36 917.270   5
 -10  -2  21 1328.35 648.919   3
  10   2 -21 992.245 526.258   5
 -10  -2  20 252.716 222.251   3
  10   2 -20 489.028 545.612   5
  10   2 -19 626.496 417.637   5
 -10  -2  19 470.124 225.935   3
  10   2 -18 823.446 488.973   5
 -10  -2  18 580.462 351.544   3
 -10  -2  17 11402.7 1585.78   3
  10   2 -17 11960.2 1619.39   5
  10   2 -16 1708.84 611.486   5
 -10  -2  16 2713.29 749.628   3
  10   2 -15 8323.77 1279.78   5
 -10  -2  15 7298.56 1272.27   3
 -10  -2  14 16774.5 1845.54   3
  10   2 -14 17469.0 1799.04   5
  10   2 -13 3204.11 738.007   5
 -10  -2  13 4540.28 922.805   3
 -10  -2  13 2870.32 561.051   2
 -10  -2  12-104.309 159.593   2
 -10  -2  12-255.643 484.063   3
  10   2 -12 295.547 207.539   5
  10   2 -11 5008.84 865.898   5
 -10  -2  11 4148.16 623.825   2
 -10  -2  11 3142.79 722.802   3
  10  -2 -11 4946.08 926.724   1
 -10  -2  10 8896.34 903.378   2
  10   2 -10 8998.98 1115.57   5
  10   2  -9 2633.33 586.315   5
 -10  -2   9 1561.81 375.777   2
 -10  -2   8 8499.68 852.256   2
  10   2  -8 7517.43 958.602   5
  10   2  -7 24920.4 1676.22   5
 -10  -2   7 22461.9 1385.55   2
 -10  -2   6 8367.64 843.007   2
 -10   2   5 40.2498 63.3332   4
 -10  -2   5-151.735 258.958   4
 -10  -2   5-19.2263 88.8042   2
 -10  -2   4 7515.22 837.658   2
 -10   2   4 7230.92 670.970   4
 -10  -2   4 7375.18 980.407   4
 -10  -2   3 18.9539 171.403   4
 -10   2   3 414.663 154.314   4
 -10  -2   3 487.119 267.442   2
 -10   2   3 191.370 135.894   2
 -10   2   2 30404.0 2079.19   2
 -10  -2   2 26270.5 1669.65   2
 -10  -2   2 30119.3 1969.73   4
 -10   2   1 57663.1 2789.40   2
 -10  -2   1 47438.9 1953.38   5
 -10   2   1 47773.8 1134.59   3
 -10  -2   1 49541.2 2410.05   2
 -10  -2   1 55904.5 2671.28   4
 -10   2   0 27458.5 1889.91   2
 -10  -2   0 21834.1 1288.78   5
 -10  -2   0 25619.1 1794.33   2
 -10  -2   0 26752.1 1870.33   4
 -10  -2  -1 109068. 3857.74   2
 -10   2  -1 116270. 3916.32   2
  10  -2   1 103111. 1845.53   4
 -10  -2  -1 119904. 3992.71   4
 -10  -2  -2 9431.07 1179.39   2
 -10   2  -2 10997.9 1184.26   2
  10  -2   2 10776.1 681.704   4
 -10  -2  -3 9732.08 767.452   5
 -10  -2  -3 10081.5 1253.88   2
 -10   2  -3 10472.0 1160.28   2
 -10   2  -4 21.3623 68.2486   2
 -10  -2  -4 70.9814 48.6963   5
 -10   2  -4-46.7355 226.120   5
 -10  -2  -4-262.448 229.666   2
 -10   2  -5-80.6230 159.518   2
 -10  -2  -5-97.6838 92.6639   5
 -10  -2  -5 222.200 290.370   2
 -10   2  -5-292.296 361.874   5
 -10   2  -6 595.007 254.029   2
  10  -2   6 392.599 149.095   3
 -10  -2  -6 840.256 257.530   5
 -10  -2  -6 776.094 417.982   2
 -10   2  -6 985.617 365.502   5
 -10   2  -7 2303.95 597.604   2
 -10  -2  -7 2886.18 777.787   2
 -10  -2  -7 2011.02 412.225   5
 -10   2  -7 2013.33 620.746   5
  10  -2   7 2704.69 553.461   3
 -10   2  -8 8039.96 1110.32   2
  10  -2   8 9578.33 1093.90   3
 -10  -2  -8 8416.81 885.163   5
 -10   2  -8 9806.98 1424.32   5
  10  -2   9 16349.3 1497.82   3
 -10  -2  -9 13215.4 1177.63   5
 -10   2  -9 15095.0 1807.89   5
 -10   2  -9 16047.2 1585.47   2
 -10   2 -10 4748.78 896.847   2
  10  -2  10 5702.63 942.464   3
 -10   2 -10 4809.21 1028.41   5
 -10  -2 -10 4970.70 760.397   5
 -10   2 -11-247.576 292.786   2
 -10   2 -11-24.4526 269.037   5
  10  -2  11 323.679 219.664   3
 -10   2 -12 5322.84 1119.37   5
  10  -2  12 7813.14 1250.54   3
 -10   2 -12 6404.04 1092.29   2
  10  -2  13 307.752 208.833   3
 -10   2 -13 619.650 391.308   5
 -10   2 -13 272.978 212.994   2
  10  -2  14 317.325 316.815   3
 -10   2 -14 395.329 421.240   5
 -10   2 -14 422.300 317.145   2
 -10   2 -15-122.510 374.627   5
 -10   2 -16 142.005 269.256   5
 -10   2 -17 902.261 553.139   5
 -10   2 -18-293.097 200.142   5
 -10   2 -19 362.866 418.893   5
 -10   2 -20-476.627 497.031   5
 -10  -3  25-334.927 558.664   3
  10   3 -25 175.815 315.782   5
 -10  -3  24-369.158 483.982   3
  10   3 -24 84.0934 153.191   5
 -10  -3  23-283.992 310.846   3
  10   3 -23 308.191 291.803   5
 -10  -3  22 50.5985 266.738   3
  10   3 -22 215.571 380.155   5
  10   3 -21 298.940 246.415   5
 -10  -3  21 558.420 472.542   3
 -10  -3  20-39.1345 111.319   3
  10  -3 -20 52.5885 202.600   1
  10   3 -20-234.919 199.335   5
 -10  -3  19 1645.60 613.032   3
  10   3 -19 1129.59 585.365   5
  10  -3 -19 1446.82 550.649   1
  10  -3 -18 1166.79 579.647   1
 -10  -3  18 997.958 489.975   3
  10   3 -18 759.425 489.433   5
  10  -3 -17 241.131 398.872   1
 -10  -3  17 357.302 239.770   3
  10   3 -17 855.758 424.841   5
  10   3 -16 16472.0 1934.32   5
  10  -3 -16 13847.0 1805.20   1
  10  -3 -15 598.662 431.116   1
  10   3 -15 672.831 441.834   5
  10  -3 -14 3565.75 878.655   1
  10   3 -14 5438.33 1056.05   5
  10   3 -13 1727.08 558.099   5
  10  -3 -13 2011.17 667.459   1
  10   3 -12 1838.80 560.998   5
  10  -3 -12 2157.87 686.150   1
  10   3 -11 381.588 258.361   5
 -10  -3  11 285.990 125.182   2
  10  -3 -11 273.280 170.955   1
  10  -3 -10-209.500 223.747   1
 -10  -3  10 108.150 66.3292   2
 -10  -3   9 516.141 203.294   2
  10  -3  -9 485.747 350.429   1
  10   3  -9 318.241 228.855   5
 -10  -3   8 227.295 130.333   2
  10  -3  -8 27.1086 147.723   1
  10   3  -8-4.67433 161.612   5
  10  -3  -7-27.5027 210.418   1
 -10  -3   7 156.613 128.111   2
  10   3  -7 105.502 129.899   5
 -10  -3   6 154.187 102.042   2
 -10  -3   6-124.117 339.377   4
  10   3  -6 268.002 193.083   5
  10  -3  -6 269.506 252.586   1
 -10  -3   5 1576.47 399.275   2
 -10  -3   5 1444.07 482.412   4
 -10  -3   4 1849.19 441.950   2
 -10  -3   4 2480.20 704.173   4
 -10  -3   3 1441.73 486.451   4
 -10  -3   3 1738.59 454.850   2
 -10  -3   2 3917.30 793.780   4
 -10   3   2 3941.98 794.481   2
 -10  -3   2 2645.76 597.383   2
 -10   3   1 8600.53 1183.81   2
 -10  -3   1 9421.12 1157.74   2
 -10  -3   1 9540.57 1265.05   4
 -10  -3   0 717.477 332.287   4
 -10   3   0 968.477 383.698   2
 -10  -3   0 752.665 347.760   2
 -10   3  -1 17152.0 1584.18   2
 -10  -3  -1 15470.2 1608.27   2
 -10  -3  -1 16188.7 1696.21   4
  10  -3   1 14860.4 1119.91   4
  10  -3   2 1555.12 379.731   4
 -10  -3  -2 1165.34 395.261   2
  10  -3   3 2502.68 510.272   4
 -10   3  -3 2547.37 603.133   2
 -10   3  -3 2613.07 756.430   5
 -10   3  -4 13675.9 1728.35   5
 -10   3  -4 13169.3 1339.59   2
  10  -3   4 12976.6 1211.19   4
  10  -3   5 8501.37 1027.54   4
 -10   3  -5 8938.31 1092.96   2
 -10   3  -5 10402.2 1527.06   5
 -10   3  -6 2707.55 625.667   2
 -10   3  -6 2963.95 840.210   5
 -10   3  -7 1775.37 504.888   2
 -10   3  -7 2906.49 838.410   5
 -10   3  -8 5032.21 844.454   2
 -10   3  -8 4184.66 989.956   5
 -10   3  -9-18.6654 95.1750   2
 -10   3  -9-8.86848 429.929   5
 -10   3 -10 4847.84 887.051   2
 -10   3 -10 4942.66 1114.74   5
 -10   3 -11 2964.29 710.944   2
 -10   3 -11 2134.26 760.879   5
 -10   3 -12 656.905 444.832   5
 -10   3 -12 352.810 208.422   2
 -10   3 -13-114.503 188.473   5
 -10   3 -13-90.2250 231.648   2
 -10   3 -14 867.974 511.709   5
 -10   3 -15-73.1193 251.169   5
 -10   3 -16-111.150 227.102   5
 -10   3 -17 1726.12 767.611   5
 -10   3 -18 18.3505 329.064   5
  10  -4 -25 222.048 215.593   1
  10  -4 -24 643.498 453.637   1
  10  -4 -23-14.1127 167.434   1
  10   4 -23-25.2022 227.714   5
  10  -4 -22 166.019 205.901   1
  10   4 -22 502.979 415.321   5
  10   4 -21 2052.96 782.921   5
  10  -4 -21 2106.22 775.473   1
  10   4 -20 1496.27 634.759   5
  10  -4 -20 1167.04 548.047   1
  10   4 -19 993.412 488.136   5
  10  -4 -19 1555.01 678.721   1
  10   4 -18 244.828 363.288   5
  10  -4 -18 157.670 207.644   1
  10   4 -17 255.574 252.733   5
  10  -4 -17 276.251 350.692   1
  10  -4 -16 849.927 396.588   1
  10   4 -16 1085.09 517.284   5
  10   4 -15 107.307 99.1543   5
  10  -4 -15 146.776 272.332   1
  10   4 -14 2458.92 709.008   5
  10  -4 -14 2404.07 771.199   1
  10   4 -13 125.182 133.494   5
  10  -4 -13 172.575 300.140   1
  10   4 -12 595.369 334.034   5
  10  -4 -12 59.3795 101.776   1
  10  -4 -11-187.052 255.033   1
  10   4 -11-57.6249 70.6105   5
  10  -4 -10 2124.45 708.565   1
  10   4 -10 1881.50 543.814   5
  10  -4  -9-160.344 336.808   1
  10   4  -9 375.483 260.923   5
 -10  -4   8 3597.97 973.616   4
  10   4  -8 5746.41 875.791   5
  10   4  -7 13526.9 1272.46   5
 -10  -4   7 14059.5 1841.97   4
 -10  -4   6 5436.42 1106.85   4
  10   4  -6 4548.60 697.090   5
 -10  -4   5-418.003 444.466   4
 -10  -4   4 472.687 289.802   4
 -10  -4   3 12747.4 1669.87   4
 -10  -4   2 5424.31 1138.44   4
 -10   4   2 7351.30 1235.31   2
 -10  -4   1 769.701 483.483   4
 -10   4   1 742.868 328.199   2
 -10  -4   0 5730.62 1110.71   4
 -10   4   0 5669.84 1002.94   2
 -10   4  -1 1622.10 529.724   2
  10  -4   1 1267.37 397.614   4
  10  -4   2 944.742 378.696   4
 -10   4  -2 1193.79 576.273   5
 -10   4  -2 854.996 353.735   2
 -10   4  -3 235.474 222.130   2
 -10   4  -3 892.765 431.814   5
 -10   4  -4-145.148 201.798   2
 -10   4  -4 56.3704 179.874   5
 -10   4  -5 247.337 255.597   2
 -10   4  -5-288.527 246.220   5
 -10   4  -6 2193.92 547.279   2
 -10   4  -6 2444.40 760.113   5
 -10   4  -7 2866.87 900.684   5
 -10   4  -8 10275.5 1705.82   5
 -10   4  -9 1164.29 575.783   5
 -10   4 -10-688.824 613.667   5
 -10   4 -11 275.950 304.059   5
 -10   4 -12 1437.69 746.807   5
 -10   4 -13 1660.21 723.602   5
 -10   4 -14 131.983 228.089   5
 -10   4 -15 783.961 367.035   5
 -10   4 -16-7.67217 83.6157   5
  10   5 -22-76.3849 193.901   5
  10   5 -21-411.254 371.463   5
  10  -5 -21 618.207 418.998   1
  10   5 -20 495.214 379.077   5
  10  -5 -20-159.315 222.954   1
  10   5 -19 389.752 389.274   5
  10  -5 -19-202.850 255.489   1
  10  -5 -18-243.383 368.003   1
  10   5 -18-470.327 371.004   5
  10   5 -17-83.2981 275.816   5
  10  -5 -17 313.459 351.046   1
  10  -5 -16 610.198 458.510   1
  10   5 -16 982.408 508.579   5
  10   5 -15 676.095 507.474   5
  10  -5 -15 477.436 368.805   1
  10  -5 -14 766.098 454.077   1
 -10  -5  13 428.121 443.610   4
 -10  -5  12 894.254 630.589   4
 -10  -5  11 27.8615 177.375   4
 -10  -5  10 791.450 607.425   4
 -10  -5   9 225.949 191.175   4
 -10  -5   8-69.3865 159.676   4
 -10  -5   7 359.385 340.161   4
 -10  -5   6 241.818 283.500   4
 -10  -5   5 194.252 215.095   4
 -10  -5   4 0.57284 251.860   4
 -10  -5   3 5797.62 1250.08   4
 -10  -5   2-121.937 326.733   4
 -10   5   2-176.098 335.961   2
 -10  -5   1 291.400 246.677   4
 -10   5   1 215.040 274.457   2
 -10   5   1 828.038 559.181   5
 -10  -5   0 653.974 402.853   4
 -10   5   0 2637.35 758.946   2
 -10   5   0 1672.45 684.639   5
 -10   5  -1 137.620 110.336   5
 -10  -5  -1 553.909 384.005   4
 -10   5  -2-2.51810 156.714   5
 -10   5  -3 1124.32 663.640   5
 -10   5  -4-37.7490 176.890   5
 -10   5  -5 1070.24 589.107   5
 -10   5  -6 2587.24 932.681   5
 -10   5  -7 51.4646 277.801   5
 -10   5  -8-340.716 434.041   5
 -10   5  -9 549.055 468.041   5
 -10   5 -10 242.434 253.812   5
 -10   5 -11 1884.02 926.140   5
 -10   5 -12 1121.29 649.815   5
 -10   5 -13 289.653 373.100   5
 -10  -6  13-263.961 334.807   4
 -10  -6  12 501.265 518.493   4
 -10  -6  11-33.6930 154.505   4
 -10  -6  10 296.588 163.167   4
 -10  -6   9-98.4035 176.936   4
 -10  -6   8-135.694 239.417   4
 -10  -6   7 569.064 493.544   4
 -10  -6   6 547.584 400.197   4
 -10  -6   5-440.070 415.151   4
 -10  -6   4 18.9294 140.180   4
 -10   6   4-76.4521 462.927   5
 -10  -6   3 92.2297 229.044   4
 -10   6   3-38.4733 216.400   5
 -10  -6   2-165.280 278.782   4
 -10   6   2 64.1779 318.565   5
 -10  -6   1 305.458 305.026   4
 -10   6   1 270.299 327.912   5
 -10   6   0-498.331 424.101   5
 -10   6  -1 17.3525 140.608   5
 -10   6  -2 559.970 443.338   5
 -10   6  -3 255.880 419.920   5
 -10   6  -4 105.246 224.989   5
 -10   6  -5 305.774 345.061   5
 -10   6  -6-62.8550 168.101   5
 -10   6  -7-501.375 344.070   5
 -10   6  -8-184.630 497.859   5
 -10   6  -9 509.080 430.128   5
  11   0 -28-199.981 198.445   5
 -11   0  28-477.800 593.794   3
  11   0 -27 334.580 338.352   5
 -11   0  27 1058.92 818.168   3
  11   0 -26 1174.41 679.623   5
 -11   0  26 1429.12 879.955   3
  11   0 -25 491.461 345.769   5
 -11   0  25 836.102 681.113   3
  11   0 -24 268.588 315.083   5
 -11   0  24 1194.41 895.357   3
  11   0 -23 3451.46 977.879   5
 -11   0  23 5905.71 1462.54   3
  11   0 -22 154.840 186.888   5
 -11   0  22 299.184 642.058   3
  11   0 -21-498.263 357.781   5
 -11   0  21 599.495 569.567   3
 -11   0  20 55.6692 139.394   3
  11   0 -20 86.8065 268.362   5
  11   0 -19 17031.2 1977.72   5
 -11   0  19 19894.5 2187.38   3
  11   0 -18 1530.58 657.854   5
 -11   0  18 344.716 451.927   3
 -11   0  17 845.803 383.438   3
  11   0 -17 1008.78 498.889   5
  11   0 -16 90.3200 197.717   5
 -11   0  16-182.321 268.807   3
  11   0 -15 1114.59 493.773   5
 -11   0  15 1835.34 629.455   3
 -11   0  14 734.814 443.898   3
 -11   0  13 2519.14 648.089   3
 -11   0  12 31.0337 100.923   3
 -11   0  11 873.948 347.027   3
 -11   0  10-57.4845 149.658   3
 -11   0   9 61146.9 2546.64   3
 -11   0   8 206.207 203.035   3
 -11   0   7 55889.1 2191.40   3
 -11   0   7 57997.7 2866.38   2
 -11   0   6-168.053 191.920   3
 -11   0   6 37.8632 80.7594   2
 -11   0   5 444.588 260.815   2
 -11   0   4 220.335 587.593   2
  11   0  -4 53.8791 109.973   3
  11   0  -4 31.6694 415.886   1
  11   0  -3 2549.34 370.400   3
  11   0  -3 3049.42 515.144   1
 -11   0   3 2772.88 666.095   2
 -11   0   3 2778.30 378.991   4
 -11   0   2 34.5139 62.2127   4
  11   0  -2-85.8773 84.1771   3
 -11   0   2 70.5103 62.4363   2
  11   0  -2 10.6050 79.0002   1
  11   0  -1 23144.9 1127.80   3
 -11   0   1 25961.1 1735.46   2
  11   0  -1 25288.0 1492.76   1
 -11   0   0 561.062 363.686   2
  11   0   1 71915.0 2206.47   4
 -11   0  -1 83956.0 3216.94   2
  11   0   2-128.715 96.9503   4
 -11   0  -2 122.970 232.981   2
  11   0   3 3015.74 502.294   4
 -11   0  -3 3964.87 707.412   2
 -11   0  -4 319.225 342.256   2
 -11   0  -5 10701.1 1234.38   5
 -11   0  -5 9629.43 1183.98   2
 -11   0  -6 135.655 145.154   2
 -11   0  -6-83.3598 131.193   5
 -11   0  -7 29098.2 2125.35   5
 -11   0  -7 28549.2 2197.59   2
 -11   0  -8-246.805 280.666   2
 -11   0  -8-190.056 281.584   5
 -11   0  -9-48.4081 179.623   2
 -11   0  -9-43.0308 117.681   5
 -11   0 -10-234.270 230.803   5
 -11   0 -10-179.284 165.606   2
 -11   0 -11 2808.13 804.453   2
 -11   0 -11 2648.71 758.890   5
 -11   0 -12-83.1054 147.114   5
 -11   0 -12 319.079 390.304   2
 -11   0 -13 33684.7 2652.98   5
 -11   0 -13 38769.8 3110.62   2
 -11   0 -14 31.9452 192.234   5
 -11   0 -15 15369.5 1875.74   5
 -11   0 -16 479.625 415.774   5
 -11   0 -17-128.302 285.233   5
 -11   0 -18 393.976 372.837   5
 -11   0 -19 107.142 272.476   5
 -11   0 -20-125.466 81.5586   5
 -11   0 -21 277.566 295.971   5
 -11   0 -22 38.8102 128.154   5
  11   1 -27 160.019 294.706   5
 -11  -1  27-130.734 437.112   3
  11   1 -26-214.499 260.842   5
 -11  -1  26 318.245 669.579   3
  11   1 -25 2705.43 902.171   5
 -11  -1  25 5023.62 1412.32   3
 -11  -1  24 3073.70 1059.96   3
  11   1 -24 3463.27 1035.36   5
  11   1 -23 494.538 311.339   5
 -11  -1  23 2740.44 945.758   3
  11   1 -22 157.957 138.604   5
 -11  -1  22-66.8602 337.272   3
  11   1 -21 668.697 438.218   5
 -11  -1  21 235.260 297.395   3
  11   1 -20 480.968 352.658   5
 -11  -1  20 440.048 208.138   3
  11   1 -19 1482.37 586.737   5
 -11  -1  19 1812.15 653.741   3
  11   1 -18 611.600 402.150   5
 -11  -1  18 155.421 267.908   3
 -11  -1  17 1675.37 597.572   3
  11   1 -17 1733.19 563.313   5
  11   1 -16 14070.7 1672.83   5
 -11  -1  16 14104.9 1641.18   3
  11   1 -15 4214.48 912.105   5
 -11  -1  15 3526.18 803.309   3
 -11  -1  14 1919.94 522.650   3
  11   1 -14 2025.78 615.101   5
  11   1 -13 1630.66 510.758   5
 -11  -1  13 527.826 145.434   3
  11   1 -12 10121.9 1297.64   5
 -11  -1  12 10391.6 1304.38   3
  11   1 -11 30650.6 2163.96   5
 -11  -1  11 32699.3 2212.83   3
 -11  -1  10 1692.02 473.442   3
 -11  -1  10 2112.25 526.970   2
 -11  -1   9 4587.36 778.653   3
 -11  -1   9 3749.32 683.537   2
 -11  -1   8 2661.22 533.452   3
 -11  -1   8 3464.60 635.047   2
 -11  -1   7 25929.4 1757.53   2
 -11   1   6 1625.34 302.933   3
 -11  -1   6 913.329 354.190   2
 -11   1   5 44211.5 1371.09   3
 -11   1   5 46991.2 2640.99   2
 -11  -1   5 42752.4 2172.71   2
 -11  -1   4 79362.1 2803.32   4
 -11   1   4 87816.8 3515.61   2
 -11  -1   4 85925.2 3047.35   2
 -11   1   4 77722.3 1450.63   3
 -11  -1   3 1587.98 372.665   4
 -11   1   3 2055.87 539.454   2
 -11  -1   3 2233.24 483.700   2
 -11   1   2 923.615 418.865   2
  11  -1  -2 1142.60 387.209   1
 -11  -1   2 786.660 243.676   4
 -11  -1   2 884.150 320.515   2
 -11  -1   1 1048.52 316.317   4
  11   1  -1 1055.12 242.689   1
 -11  -1   1 1298.03 359.072   2
 -11   1   1 1566.82 464.445   2
  11   1   0 8876.35 674.986   1
 -11  -1   0 8534.35 1019.69   2
 -11   1   0 9710.69 1115.36   2
 -11  -1   0 8676.03 906.757   4
 -11  -1  -1 3754.10 717.095   2
 -11   1  -1 1835.86 519.696   2
 -11  -1  -2 2634.24 598.825   2
 -11   1  -2 2839.49 602.682   2
 -11  -1  -3 3872.26 767.278   2
  11  -1   3 3389.79 354.968   3
 -11   1  -3 3426.56 665.513   2
  11  -1   4 12750.3 790.188   3
 -11  -1  -4 10035.0 1032.35   5
 -11  -1  -4 11035.8 1312.80   2
 -11   1  -4 12995.9 1334.02   2
 -11  -1  -5 14283.5 1268.10   5
 -11  -1  -5 13530.7 693.114   1
 -11  -1  -5 14918.2 1564.56   2
 -11   1  -5 15366.3 1495.97   2
 -11   1  -5 14304.7 1548.56   5
 -11  -1  -6 2254.96 601.025   2
 -11   1  -6 4182.33 787.432   2
 -11  -1  -6 3166.26 603.937   5
 -11  -1  -6 2902.52 354.017   1
 -11   1  -6 3587.66 799.898   5
 -11  -1  -7 5383.40 827.801   5
 -11   1  -7 5365.46 919.598   2
 -11   1  -7 5327.12 970.335   5
 -11  -1  -7 4038.58 454.365   1
 -11  -1  -7 4770.85 937.431   2
 -11  -1  -8 8636.94 1074.98   5
 -11   1  -8 10039.3 1374.69   5
 -11  -1  -8 9152.85 1349.75   2
 -11   1  -8 9294.85 1231.85   2
 -11  -1  -9 10325.3 1217.46   5
 -11   1  -9 10715.6 1459.36   5
 -11  -1  -9 11088.2 1560.56   2
 -11   1  -9 10941.0 1383.44   2
 -11   1 -10 2735.24 719.764   2
 -11  -1 -10 2498.74 605.925   5
 -11   1 -10 2271.38 679.179   5
 -11  -1 -10 3304.37 832.415   2
 -11  -1 -11 94.9073 220.266   2
 -11  -1 -11 203.635 133.385   5
 -11   1 -11-213.364 431.894   5
 -11   1 -11 363.907 250.498   2
 -11  -1 -12 2123.27 577.406   5
 -11   1 -12 2692.62 775.830   5
 -11   1 -12 2220.85 711.240   2
 -11  -1 -13-16.6124 202.607   5
 -11   1 -13 460.142 305.238   5
 -11   1 -13 194.186 258.235   2
 -11  -1 -14 66.5699 228.716   5
 -11   1 -14 426.166 314.816   2
 -11   1 -14 338.044 287.430   5
 -11  -1 -15 2877.35 736.564   5
 -11   1 -15 3492.96 923.803   5
 -11  -1 -16 1359.66 519.702   5
 -11   1 -16 1216.16 563.194   5
 -11  -1 -17 1690.46 590.122   5
 -11   1 -17 2218.94 733.458   5
 -11   1 -18 476.650 448.574   5
 -11   1 -19 1431.78 604.514   5
 -11   1 -20-6.73032 198.897   5
 -11   1 -21-266.147 317.828   5
  11   2 -26 582.727 544.891   5
 -11  -2  26-64.3206 354.518   3
  11   2 -25 133.640 180.502   5
 -11  -2  25-624.199 535.780   3
  11   2 -24 523.617 436.817   5
 -11  -2  24-391.468 455.599   3
  11   2 -23 496.660 340.281   5
 -11  -2  23 192.731 179.144   3
  11   2 -22 518.836 437.616   5
 -11  -2  22 476.394 403.171   3
  11   2 -21 332.950 342.389   5
 -11  -2  21 1399.99 629.525   3
  11   2 -20 1111.94 527.381   5
 -11  -2  20 1346.58 581.271   3
  11   2 -19 498.078 434.099   5
 -11  -2  19-130.373 210.169   3
  11   2 -18 6743.56 1255.37   5
 -11  -2  18 9379.51 1457.95   3
  11   2 -17 261.337 119.499   5
 -11  -2  17 200.258 279.772   3
 -11  -2  16 584.263 253.623   3
  11   2 -16-149.271 174.265   5
 -11  -2  15 117.087 274.874   3
  11   2 -15 108.725 183.982   5
 -11  -2  14 538.830 195.286   3
  11   2 -14 517.371 327.609   5
 -11  -2  14 363.405 248.844   2
 -11  -2  13-6.68922 323.736   3
 -11  -2  13-72.6159 151.364   2
  11   2 -13-5.42280 145.089   5
 -11  -2  12 2663.68 539.085   2
 -11  -2  12 2305.72 602.305   3
  11   2 -12 3067.27 705.867   5
  11  -2 -12 2551.07 693.073   1
  11  -2 -11 1238.26 503.569   1
 -11  -2  11 1436.76 382.955   2
  11   2 -11 1349.69 529.421   5
  11   2 -10 31900.9 2158.13   5
  11  -2 -10 33408.5 2386.61   1
 -11  -2  10 32146.5 1790.29   2
  11   2  -9 4234.57 761.290   5
 -11  -2   9 3521.98 580.100   2
 -11  -2   8 3745.97 584.515   2
 -11  -2   7 876.059 287.880   2
 -11  -2   6 1336.69 345.486   2
 -11   2   5 132.498 59.9390   4
 -11  -2   5-15.0582 148.493   4
 -11  -2   5 161.603 55.8259   2
 -11   2   4 7175.42 1056.81   2
 -11  -2   4 6092.01 791.455   2
 -11   2   4 5421.98 537.823   4
 -11  -2   4 5477.66 871.596   4
 -11  -2   3 167.401 92.0794   4
 -11  -2   3-42.6676 110.091   2
 -11   2   2 55582.9 2907.35   2
 -11  -2   2 49942.3 2411.86   2
 -11  -2   2 52044.8 2652.09   4
 -11  -2   1 2834.19 604.109   4
 -11   2   1 2880.77 701.140   2
 -11  -2   1 3328.72 654.582   2
 -11  -2   0 29232.1 1964.74   2
  11   2   0 26896.0 760.859   1
 -11  -2   0 28923.1 1991.34   4
 -11   2   0 32481.8 2150.71   2
 -11  -2  -1 30804.7 2097.95   2
 -11   2  -1 33705.9 2170.37   2
 -11  -2  -1 31339.3 2095.31   4
 -11  -2  -2 2557.52 633.335   2
 -11   2  -2 2828.62 639.253   2
  11  -2   2 2072.25 245.656   4
 -11  -2  -3 743.701 325.703   2
  11  -2   3 862.083 202.012   4
 -11   2  -3 1234.48 439.103   2
 -11  -2  -3 999.859 281.177   5
 -11   2  -4 739.933 307.235   2
 -11  -2  -4 536.409 189.302   5
 -11  -2  -4 34.0644 169.809   2
 -11   2  -5 157.472 186.235   2
 -11  -2  -5 72.8683 82.1726   5
 -11   2  -5-169.729 334.577   5
 -11  -2  -5 398.393 287.149   2
  11  -2   6 7847.68 847.622   3
 -11  -2  -6 6996.51 791.581   5
 -11  -2  -6 7688.45 1237.89   2
 -11   2  -6 7158.52 1026.66   2
 -11   2  -6 6961.94 1173.12   5
 -11   2  -7 4959.22 884.836   2
 -11  -2  -7 3824.10 594.944   5
  11  -2   7 4752.68 724.516   3
 -11  -2  -7 5581.17 1110.82   2
 -11   2  -7 4976.92 1000.04   5
 -11  -2  -8 6415.76 801.042   5
 -11  -2  -8 6733.88 1237.79   2
 -11   2  -8 7753.81 1097.74   2
  11  -2   8 9065.59 1073.92   3
 -11   2  -8 7353.17 1204.47   5
 -11   2  -9 1603.93 538.744   2
  11  -2   9 3248.87 689.688   3
 -11  -2  -9 1957.90 466.491   5
 -11   2  -9 1870.61 605.414   5
 -11   2 -10 1017.96 405.536   2
  11  -2  10 1225.70 407.342   3
 -11   2 -10 1146.18 533.599   5
 -11   2 -11 853.389 382.749   2
 -11   2 -11 13.2856 280.578   5
 -11   2 -12 919.185 477.910   5
 -11   2 -12 808.735 355.742   2
 -11   2 -13 2222.99 750.020   5
 -11   2 -13 1422.24 532.264   2
 -11   2 -14 3589.45 991.461   5
 -11   2 -14 2758.10 774.610   2
 -11   2 -15 213.496 128.540   2
 -11   2 -15 107.034 97.3755   5
 -11   2 -16 857.346 535.243   5
 -11   2 -17 830.058 521.733   5
 -11   2 -18-132.742 379.374   5
 -11   2 -19 799.153 453.592   5
 -11   2 -20 846.575 577.733   5
 -11  -3  25 337.857 322.296   3
  11   3 -25 468.156 414.323   5
 -11  -3  24 328.569 207.038   3
  11   3 -24-11.7175 194.958   5
 -11  -3  23 133.674 332.028   3
  11   3 -23-241.865 286.839   5
  11   3 -22 442.256 393.242   5
 -11  -3  22 183.615 297.683   3
 -11  -3  21 493.748 192.696   3
  11   3 -21 573.254 334.141   5
  11  -3 -21 658.800 375.000   1
 -11  -3  20-245.210 203.610   3
  11  -3 -20 412.799 283.165   1
 -11  -3  19-536.989 438.153   3
  11   3 -19 186.386 250.086   5
  11  -3 -19 267.911 355.265   1
  11  -3 -18 747.307 448.588   1
 -11  -3  18 196.873 440.735   3
  11   3 -18 609.695 354.703   5
  11  -3 -17 1645.82 657.245   1
  11   3 -17 1552.39 595.446   5
  11  -3 -16 3194.72 884.214   1
  11   3 -16 3764.84 941.859   5
  11  -3 -15 1097.64 520.518   1
  11   3 -15 832.646 381.598   5
  11  -3 -14 1356.95 575.749   1
  11   3 -14 687.358 382.009   5
  11   3 -13 1060.82 404.574   5
  11  -3 -13 1223.01 501.474   1
  11   3 -12 4207.85 857.211   5
  11  -3 -12 3890.18 917.128   1
  11   3 -11 5726.47 939.744   5
 -11  -3  11 4960.80 597.188   2
  11  -3 -11 6605.27 1158.69   1
  11  -3 -10 1100.94 539.269   1
 -11  -3  10 1352.76 325.319   2
  11   3 -10 1701.71 486.313   5
 -11  -3   9 665.616 200.230   2
  11   3  -9 564.798 227.476   5
  11  -3  -9 512.753 307.807   1
 -11  -3   8 78.0693 94.9598   2
  11   3  -8 407.506 235.080   5
  11  -3  -8 515.709 365.945   1
 -11  -3   7 1916.58 423.410   2
 -11  -3   7 1981.24 609.360   4
  11   3  -7 1929.70 480.176   5
  11  -3  -7 1906.17 616.536   1
 -11  -3   6 346.058 187.651   2
  11  -3  -6 174.154 183.965   1
 -11  -3   6-130.604 274.487   4
 -11  -3   5 1334.32 366.805   2
 -11  -3   5 803.724 416.930   4
 -11  -3   4 2786.38 570.769   2
 -11  -3   4 2162.13 588.487   4
 -11  -3   3 2735.63 617.291   2
 -11  -3   3 2156.00 638.587   4
 -11   3   3 2686.50 709.527   2
 -11   3   2 16227.8 1718.68   2
 -11  -3   2 13865.4 1391.31   2
 -11  -3   2 13261.6 1529.60   4
 -11  -3   1 3689.02 785.937   4
 -11   3   1 4156.66 819.698   2
 -11  -3   1 3770.64 764.002   2
 -11   3   0 12284.4 1431.80   2
 -11  -3   0 11338.6 1359.59   2
 -11  -3   0 13694.9 1567.30   4
 -11  -3  -1 2489.44 670.257   2
 -11  -3  -1 2634.20 723.864   4
 -11   3  -1 3079.92 711.656   2
  11  -3   2 1901.70 382.212   4
 -11   3  -2 2740.41 672.066   2
 -11  -3  -2 1461.67 531.927   2
  11  -3   3 2617.32 472.628   4
 -11  -3  -3 2501.25 728.215   2
 -11   3  -3 2730.66 670.034   2
 -11   3  -4 24593.8 2383.69   5
 -11   3  -4 24938.4 1910.63   2
 -11   3  -5 2247.83 566.043   2
 -11   3  -5 2275.94 752.122   5
 -11   3  -6 6275.31 960.822   2
 -11   3  -6 6302.85 1237.99   5
 -11   3  -7 4779.86 862.264   2
 -11   3  -7 3739.48 981.193   5
 -11   3  -8 8274.08 1137.91   2
 -11   3  -8 9547.79 1545.48   5
 -11   3  -9 68.6417 76.2436   2
 -11   3  -9 363.126 129.110   5
 -11   3 -10 16.8859 79.3563   2
 -11   3 -10-115.550 326.177   5
 -11   3 -11 192.685 112.285   2
 -11   3 -11 1334.11 584.417   5
 -11   3 -12 551.499 426.968   5
 -11   3 -12 188.503 160.429   2
 -11   3 -13-306.924 264.315   5
 -11   3 -13 428.355 295.545   2
 -11   3 -14 484.182 396.576   5
 -11   3 -15 156.745 396.811   5
 -11   3 -16 348.766 338.644   5
 -11   3 -17 195.458 118.280   5
  11  -4 -24-15.0196 90.2175   1
  11   4 -23 58.2175 177.918   5
  11  -4 -23 258.192 336.021   1
  11   4 -22 359.169 308.808   5
  11  -4 -22 258.525 296.437   1
  11   4 -21 1623.83 733.463   5
  11  -4 -21 362.788 320.947   1
  11   4 -20 612.542 373.459   5
  11  -4 -20 124.295 108.039   1
  11   4 -19 265.929 189.528   5
  11  -4 -19 475.164 346.695   1
  11   4 -18 1196.95 596.064   5
  11  -4 -18 731.785 491.970   1
  11   4 -17 1757.74 690.641   5
  11  -4 -17 236.626 196.808   1
  11  -4 -16-302.174 400.015   1
  11   4 -16 67.6928 150.453   5
  11  -4 -15 3663.69 969.227   1
  11   4 -15 4435.04 988.306   5
  11   4 -14 387.489 211.736   5
  11  -4 -14-499.411 483.172   1
  11   4 -13 131.184 60.2510   5
  11  -4 -13 17.8596 205.609   1
  11  -4 -12 1760.29 639.295   1
  11   4 -12 2123.24 623.306   5
  11   4 -11 805.256 365.596   5
  11  -4 -11 808.109 436.384   1
 -11  -4  10 1272.05 560.587   4
  11   4 -10 324.291 184.176   5
  11  -4 -10 592.826 400.570   1
 -11  -4   9 599.879 421.190   4
  11  -4  -9 281.522 227.584   1
  11   4  -9 1219.84 423.099   5
 -11  -4   8 1954.62 716.396   4
  11   4  -8 1480.93 433.139   5
 -11  -4   7-21.8184 184.077   4
  11   4  -7-39.8987 92.5555   5
 -11  -4   6-117.215 303.754   4
 -11  -4   5 1218.89 486.542   4
 -11  -4   4 1335.21 557.298   4
 -11   4   3 20022.9 2163.30   2
 -11  -4   3 16247.3 1919.18   4
 -11  -4   2 7448.46 1303.03   4
 -11   4   2 9372.58 1426.16   2
 -11  -4   1 1023.03 509.111   4
 -11   4   1 1177.21 542.646   2
 -11  -4   0 714.853 351.611   4
 -11   4   0 1024.06 504.850   2
 -11   4  -1 2266.74 671.426   2
 -11  -4  -1 872.536 468.868   4
 -11   4  -2 559.847 372.450   2
 -11   4  -2 442.137 365.855   5
 -11   4  -3 824.887 394.076   2
 -11   4  -3 796.360 559.064   5
 -11   4  -4 1427.38 493.598   2
 -11   4  -4 610.625 365.895   5
 -11   4  -5 1196.85 433.248   2
 -11   4  -5 1437.06 677.564   5
 -11   4  -6 2384.09 610.877   2
 -11   4  -6 2070.46 710.831   5
 -11   4  -7 423.876 134.817   5
 -11   4  -8 1001.11 545.233   5
 -11   4  -9 699.193 337.496   5
 -11   4 -10-36.8494 312.504   5
 -11   4 -11-22.3702 116.261   5
 -11   4 -12-78.3587 227.842   5
 -11   4 -13 528.567 412.914   5
 -11   4 -14-263.540 348.813   5
 -11   4 -15 24.5580 310.772   5
  11   5 -22 592.140 451.457   5
  11   5 -21-15.2538 107.798   5
  11  -5 -21 49.3080 102.025   1
  11   5 -20 503.035 375.855   5
  11  -5 -20-164.752 234.319   1
  11  -5 -19-107.605 197.189   1
  11   5 -19-39.1957 216.961   5
  11  -5 -18-16.1018 183.286   1
  11   5 -18 447.725 358.514   5
  11   5 -17 446.390 354.347   5
  11  -5 -17-101.240 171.161   1
  11  -5 -16 2464.24 870.827   1
  11  -5 -15 3178.39 1000.88   1
 -11  -5  14 2444.69 947.901   4
  11  -5 -14 2423.99 846.868   1
 -11  -5  13 585.755 619.993   4
 -11  -5  12 2559.37 986.049   4
 -11  -5  11 863.196 641.118   4
 -11  -5  10 1319.30 670.965   4
 -11  -5   9-303.125 339.128   4
 -11  -5   8 160.550 231.563   4
 -11  -5   7 1509.78 630.290   4
 -11  -5   6 1129.59 557.602   4
 -11  -5   5 1329.06 612.031   4
 -11  -5   4 7090.62 1398.79   4
 -11  -5   3 743.118 470.408   4
 -11   5   3 2193.00 803.879   2
 -11  -5   2 2457.70 796.471   4
 -11   5   2 3775.98 964.600   2
 -11  -5   1-95.6784 105.326   4
 -11   5   1 497.827 386.594   2
 -11  -5   0-190.744 396.886   4
 -11   5   0 31.2909 99.7275   2
 -11   5   0-401.859 399.840   5
 -11   5  -1 937.989 486.032   5
 -11   5  -2 124.756 221.181   5
 -11   5  -3 809.318 523.756   5
 -11   5  -4 359.471 274.943   5
 -11   5  -5-107.782 116.965   5
 -11   5  -6 421.290 411.256   5
 -11   5  -7 266.425 294.733   5
 -11   5  -8-256.159 441.308   5
 -11   5  -9 2226.79 843.284   5
 -11   5 -10 218.089 316.698   5
 -11   5 -11 1043.58 643.599   5
 -11   5 -12 455.382 294.049   5
 -11  -6  12 428.263 461.950   4
 -11  -6  11 131.008 235.893   4
 -11  -6  10 477.132 236.930   4
 -11  -6   9 94.1921 253.215   4
 -11  -6   8 863.014 536.629   4
 -11  -6   7-208.725 311.353   4
 -11  -6   6 159.225 332.481   4
 -11  -6   5 118.326 250.144   4
 -11  -6   4 21.3440 157.290   4
 -11   6   4-277.652 329.715   5
 -11  -6   3 273.332 289.863   4
 -11   6   3 55.2901 263.860   5
 -11  -6   2-429.325 416.380   4
 -11   6   2 630.000 502.371   5
 -11   6   1-295.530 472.260   5
 -11  -6   1 610.546 468.734   4
 -11   6   0 254.504 314.713   5
 -11   6  -1 245.674 238.765   5
 -11   6  -2 435.464 360.353   5
 -11   6  -3 850.759 468.583   5
 -11   6  -4 315.987 375.851   5
 -11   6  -5 625.126 368.642   5
 -11   6  -6 38.8876 165.770   5
 -11   6  -7-375.093 397.306   5
  12   0 -28 1465.36 715.592   5
 -12   0  28 987.326 1075.93   3
  12   0 -27-150.029 312.830   5
 -12   0  27 573.721 549.541   3
  12   0 -26 570.685 425.052   5
 -12   0  26 2587.63 1153.71   3
  12   0 -25 215.522 329.776   5
 -12   0  25 615.079 655.793   3
  12   0 -24 924.264 616.780   5
 -12   0  24 816.110 698.315   3
  12   0 -23 341.241 312.825   5
 -12   0  23-453.148 363.136   3
 -12   0  22 2441.73 847.828   3
  12   0 -22 1073.94 486.942   5
  12   0 -21-694.913 421.677   5
 -12   0  21 238.535 390.733   3
  12   0 -20 619.567 332.366   5
 -12   0  20-200.298 178.217   3
 -12   0  19 185.592 408.802   3
  12   0 -19 15.2102 274.154   5
  12   0 -18 16774.4 1936.46   5
 -12   0  18 19109.7 2041.31   3
 -12   0  17 102.191 225.096   3
 -12   0  16 30921.0 2412.93   3
 -12   0  15 913.257 511.238   3
 -12   0  14 41147.5 2546.07   3
 -12   0  13 158.421 270.954   3
 -12   0  12 21067.6 1680.84   3
 -12   0  11 100.998 186.600   3
 -12   0  10 27868.0 1795.10   3
 -12   0   9 92.2264 181.604   3
 -12   0   8 9179.90 949.127   3
 -12   0   8 10382.1 1267.09   2
 -12   0   7 71.5544 126.260   3
 -12   0   7-37.0308 96.6747   2
 -12   0   6 15389.5 1485.72   2
 -12   0   5-118.965 247.836   2
 -12   0   4 15239.8 1472.50   2
  12   0  -4 16609.7 1300.37   1
 -12   0   3-178.868 101.250   4
  12   0  -3 87.8513 96.8494   3
  12   0  -3 28.4490 70.8105   1
 -12   0   2 44697.8 2412.22   2
  12   0  -2 38839.2 1514.45   3
  12   0  -2 42512.0 2048.84   1
 -12   0   2 42766.1 1480.26   4
  12   0  -1-299.253 135.559   3
 -12   0   1 24.3296 97.8530   2
  12   0  -1 21.1740 107.953   1
 -12   0   0 30039.6 1991.38   2
 -12   0  -1-148.290 275.623   2
 -12   0  -2 3543.43 687.786   2
  12   0   2 2670.55 457.847   4
 -12   0  -3-118.635 104.386   2
 -12   0  -4 14275.7 1474.17   2
 -12   0  -5 267.039 263.138   2
 -12   0  -5 25.0153 175.862   5
 -12   0  -6 9590.50 1208.25   5
 -12   0  -6 9005.96 1229.70   2
 -12   0  -7 13.6348 91.0318   2
 -12   0  -7-11.7921 108.374   5
 -12   0  -8 51.1229 109.173   2
 -12   0  -8 256.682 191.972   5
 -12   0  -9-663.826 367.634   2
 -12   0  -9-15.2638 220.665   5
 -12   0 -10 4424.60 895.904   5
 -12   0 -10 4155.52 957.081   2
 -12   0 -11-27.9729 182.058   5
 -12   0 -11-92.7187 367.647   2
 -12   0 -12 1124.25 487.844   5
 -12   0 -12 2944.76 864.212   2
 -12   0 -13 157.430 214.331   5
 -12   0 -13 325.416 297.990   2
 -12   0 -14 10347.3 1493.09   5
 -12   0 -15 560.477 356.122   5
 -12   0 -16-99.5840 211.370   5
 -12   0 -17-118.449 402.480   5
 -12   0 -18 468.337 368.249   5
 -12   0 -19 464.167 337.086   5
 -12   0 -20 631.357 428.977   5
 -12   0 -21-36.1007 124.736   5
  12   1 -27 1453.25 723.263   5
 -12  -1  27 1191.90 814.866   3
  12   1 -26 2166.36 819.753   5
 -12  -1  26 3032.64 1169.55   3
  12   1 -25 1643.89 733.366   5
 -12  -1  25 3442.93 1238.25   3
  12   1 -24 209.980 389.090   5
 -12  -1  24 765.578 565.125   3
 -12  -1  23-409.707 278.509   3
  12   1 -23-92.0253 170.743   5
  12   1 -22-296.452 297.852   5
 -12  -1  22 364.143 165.486   3
  12   1 -21 678.866 443.790   5
 -12  -1  21 1482.16 597.850   3
  12   1 -20 1843.71 710.748   5
 -12  -1  20 1734.21 771.115   3
  12   1 -19 9082.38 1470.42   5
 -12  -1  19 12323.2 1710.72   3
 -12  -1  18 1087.21 411.115   3
  12   1 -18 1027.20 467.437   5
  12   1 -17 68.3956 187.673   5
 -12  -1  17 287.571 322.218   3
  12   1 -16 24653.0 2244.70   5
 -12  -1  16 29915.5 2457.01   3
 -12  -1  15 4998.09 974.012   3
  12   1 -15 5183.48 999.684   5
  12   1 -14 7165.09 1162.43   5
 -12  -1  14 6028.90 1034.26   3
  12   1 -13 3169.80 730.618   5
 -12  -1  13 3343.68 667.787   3
 -12  -1  12 872.880 311.669   3
 -12  -1  11 1485.66 497.981   3
 -12  -1  11 906.273 354.078   2
 -12  -1  10 1973.88 530.477   2
 -12  -1  10 2144.41 506.316   3
 -12  -1   9 817.296 236.955   3
 -12  -1   9 1093.91 410.757   2
 -12  -1   8 11233.7 1224.91   2
 -12   1   8 11034.4 900.923   3
 -12  -1   7 18098.6 1518.42   2
 -12   1   7 17863.3 1116.28   3
 -12   1   6 207.655 135.669   3
 -12   1   6-149.223 270.305   2
 -12  -1   6 39.6009 195.488   2
 -12   1   5 4866.55 438.168   3
 -12   1   5 5863.76 972.965   2
 -12  -1   5 6036.85 876.995   2
 -12   1   4 62057.5 3050.35   2
 -12  -1   4 59534.4 2664.65   2
 -12  -1   4 54859.7 2364.01   4
 -12   1   3 16641.5 1551.16   2
 -12  -1   3 15211.8 1363.04   2
 -12  -1   3 14726.5 1205.84   4
 -12  -1   2 19054.2 1540.44   2
  12   1  -2 19326.6 1143.96   1
 -12  -1   2 19413.1 1371.10   4
 -12   1   2 21001.7 1728.47   2
 -12  -1   1 6759.11 927.331   2
  12   1  -1 6218.91 628.522   1
 -12   1   1 6736.10 983.866   2
 -12  -1   1 6344.99 778.612   4
 -12  -1   0 9466.70 1109.96   2
 -12   1   0 8190.90 1054.96   2
 -12  -1  -1 6827.32 981.517   2
 -12   1  -1 6214.92 919.267   2
 -12  -1  -2 1597.85 488.304   2
 -12   1  -2 1570.19 485.992   2
  12  -1   3 32.4962 39.4887   4
 -12  -1  -3 178.779 273.452   2
 -12   1  -3 76.1493 146.130   2
  12  -1   3 51.1141 70.9473   3
 -12  -1  -4-245.469 214.288   2
 -12   1  -4-315.114 261.760   2
  12  -1   4 133.604 107.230   3
 -12  -1  -4-245.518 170.424   5
 -12  -1  -5 1814.63 554.055   2
 -12   1  -5 2081.09 607.929   2
 -12  -1  -5 1235.46 373.826   5
 -12   1  -5 2206.29 601.568   5
 -12  -1  -6 878.195 383.562   2
 -12   1  -6 886.581 374.764   2
 -12  -1  -6 755.554 320.084   5
 -12   1  -6 777.709 329.786   5
 -12  -1  -7 1725.01 552.701   2
 -12   1  -7 1169.23 446.601   2
 -12  -1  -7 1158.05 399.968   5
 -12   1  -7 1720.15 599.094   5
 -12   1  -8 919.834 382.034   2
 -12  -1  -8 783.620 342.226   5
 -12   1  -8 820.673 325.981   5
 -12  -1  -8 1931.03 622.410   2
 -12   1  -9 322.063 279.445   2
 -12   1  -9 294.360 293.259   5
 -12  -1  -9-235.040 231.504   5
 -12  -1  -9-201.593 246.488   2
 -12   1 -10 2592.85 710.776   2
 -12  -1 -10 1774.37 511.239   5
 -12   1 -10 3909.41 908.955   5
 -12  -1 -10 2981.28 827.767   2
 -12  -1 -11 4403.15 861.952   5
 -12   1 -11 4645.49 995.467   5
 -12  -1 -11 5145.23 1131.11   2
 -12   1 -11 3667.61 886.803   2
 -12  -1 -12 282.198 207.849   5
 -12   1 -12 182.720 153.885   5
 -12   1 -12 459.841 302.203   2
 -12  -1 -13 14.5357 121.311   5
 -12   1 -13-25.0960 275.748   5
 -12   1 -13-233.661 202.469   2
 -12  -1 -14 964.710 447.683   5
 -12   1 -14 1078.30 506.559   5
 -12   1 -14 1044.48 499.835   2
 -12  -1 -15 369.301 354.311   5
 -12   1 -15 111.799 165.011   2
 -12   1 -15 380.412 355.646   5
 -12   1 -16 120.747 243.026   5
 -12   1 -17-142.803 84.3423   5
 -12   1 -18 3805.83 1068.83   5
 -12   1 -19 613.240 416.341   5
 -12   1 -20 72.5496 262.679   5
 -12   1 -21 83.9158 192.223   5
  12   2 -26-237.665 310.711   5
 -12  -2  26 428.859 478.500   3
 -12  -2  25-624.085 545.382   3
  12   2 -25 31.2653 119.911   5
  12   2 -24 1782.39 780.490   5
 -12  -2  24 1212.02 467.021   3
  12   2 -23 1489.63 697.294   5
 -12  -2  23 2365.33 867.945   3
  12   2 -22 4652.71 1135.85   5
 -12  -2  22 2916.30 950.867   3
 -12  -2  21 10469.1 1747.75   3
  12   2 -21 10957.6 1746.74   5
 -12  -2  20 25118.4 2631.11   3
  12   2 -20 19509.4 2259.77   5
  12   2 -19 4846.62 1092.53   5
 -12  -2  19 4063.17 1054.96   3
  12   2 -18 11587.7 1648.28   5
 -12  -2  18 11394.1 1687.92   3
 -12  -2  17 8274.49 1425.39   3
  12   2 -17 7017.51 1266.47   5
 -12  -2  16 83.4854 306.863   3
  12   2 -16 191.202 92.4912   5
 -12  -2  15 3052.28 785.583   3
  12   2 -15 4486.65 957.500   5
 -12  -2  15 3719.21 713.953   2
 -12  -2  14 1424.18 447.696   3
  12   2 -14 1805.93 597.839   5
 -12  -2  14 1405.06 417.507   2
 -12  -2  13 347.861 213.240   2
  12   2 -13 121.952 151.238   5
  12  -2 -13 62.4139 100.033   1
  12  -2 -12 94.1515 146.865   1
 -12  -2  12 232.239 170.460   2
  12   2 -12 130.850 99.4028   5
 -12  -2  11 11760.7 1156.05   2
  12   2 -11 12230.7 1402.64   5
  12  -2 -11 13681.5 1595.40   1
  12  -2 -10 319.978 300.104   1
  12   2 -10-53.8037 174.724   5
 -12  -2  10-26.9080 108.301   2
  12  -2  -9 5696.51 999.140   1
 -12  -2   9 7579.56 897.225   2
 -12  -2   8 15705.1 1284.50   2
  12  -2  -8 18100.3 1758.53   1
 -12  -2   7 29.9753 105.376   2
 -12  -2   6 4149.85 801.547   4
 -12  -2   6 4315.64 680.872   2
 -12   2   6 4358.93 580.659   4
 -12   2   5 718.891 214.734   4
 -12  -2   5 1358.18 433.384   4
 -12  -2   5 938.899 323.292   2
 -12   2   5 1053.57 397.458   2
 -12   2   4 53.8886 54.3788   4
 -12  -2   4 26.5619 54.4190   2
 -12   2   4-120.037 187.375   2
  12  -2  -4 9.14260 167.957   1
 -12  -2   3 1906.12 513.113   4
 -12   2   3 1907.82 600.564   2
 -12  -2   3 1780.15 463.205   2
 -12  -2   2 920.906 364.369   4
 -12   2   2 552.783 376.710   2
 -12  -2   2 668.086 290.384   2
 -12   2   1 8618.91 1158.21   2
 -12  -2   1 7845.97 1027.58   2
 -12  -2   1 9012.33 1106.26   4
 -12  -2   0 13577.6 1409.66   2
 -12  -2   0 16988.3 1548.48   4
 -12   2   0 16994.9 1602.03   2
 -12  -2  -1 9546.68 1203.89   2
 -12   2  -1 11930.6 1333.65   2
 -12  -2  -2 914.146 381.323   2
 -12   2  -2 1518.64 486.676   2
 -12  -2  -3 1020.42 397.849   2
 -12   2  -3 2241.15 575.501   2
 -12  -2  -3 1755.84 383.795   5
  12  -2   3 1589.73 225.915   4
 -12   2  -4 1129.08 372.619   2
 -12  -2  -4 934.294 287.915   5
 -12  -2  -4 537.748 221.519   2
 -12   2  -5 5466.60 918.535   2
 -12  -2  -5 5228.79 685.718   5
 -12   2  -5 4682.85 978.388   5
 -12  -2  -5 4335.03 929.387   2
 -12  -2  -6 13124.1 1124.58   5
 -12   2  -6 11411.0 1551.26   5
 -12  -2  -6 14216.5 1745.32   2
 -12   2  -6 13941.5 1490.40   2
 -12  -2  -7 4777.61 705.020   5
 -12   2  -7 6827.11 1073.32   2
 -12   2  -7 6707.39 1230.42   5
 -12  -2  -7 6891.00 1268.77   2
 -12   2  -8 3230.94 738.652   2
 -12  -2  -8 2460.29 500.842   5
 -12  -2  -8 2562.16 767.737   2
 -12   2  -8 3388.62 837.008   5
 -12   2  -9 138.615 224.231   2
 -12  -2  -9-244.997 276.545   2
 -12   2  -9-203.223 295.305   5
 -12   2 -10 184.118 280.773   2
 -12   2 -10 125.292 176.010   5
 -12   2 -11 3020.12 783.969   2
 -12   2 -11 2276.02 745.406   5
 -12   2 -12-153.069 313.470   5
 -12   2 -12 560.737 337.653   2
 -12   2 -13 673.233 378.102   5
 -12   2 -13 319.319 95.1869   2
 -12   2 -14-184.588 332.555   5
 -12   2 -14 23.6443 74.6141   2
 -12   2 -15 63.0709 110.821   2
 -12   2 -15 382.247 361.493   5
 -12   2 -16 485.919 370.669   5
 -12   2 -17-128.474 348.116   5
 -12   2 -18 152.907 243.551   5
 -12   2 -19 46.6497 157.737   5
  12   3 -25 168.581 365.757   5
  12   3 -24 666.846 533.408   5
 -12  -3  24-260.895 340.456   3
  12   3 -23 377.195 296.660   5
  12  -3 -23 214.993 206.082   1
 -12  -3  23 426.767 254.963   3
 -12  -3  22 721.044 684.859   3
  12   3 -22 302.305 289.171   5
  12  -3 -22 260.876 254.766   1
 -12  -3  21 228.306 245.956   3
  12   3 -21 688.581 432.905   5
  12  -3 -21 380.246 287.470   1
  12  -3 -20 1564.53 661.895   1
 -12  -3  20 1664.59 646.516   3
  12   3 -20 3061.18 937.931   5
  12  -3 -19 3794.51 1000.03   1
 -12  -3  19 2470.00 715.144   3
  12   3 -19 2564.32 849.718   5
  12  -3 -18 823.327 492.501   1
  12   3 -18 879.338 499.174   5
  12  -3 -17 217.194 201.854   1
  12   3 -17 649.417 383.842   5
  12  -3 -16 119.920 391.256   1
  12   3 -16 506.417 353.787   5
  12   3 -15 2880.14 775.481   5
  12  -3 -15 3528.71 929.686   1
  12   3 -14 15.6649 97.5725   5
  12  -3 -14 242.220 195.640   1
  12   3 -13 545.776 296.396   5
  12  -3 -13 1565.90 609.328   1
  12   3 -12 1193.25 421.857   5
  12  -3 -12 1141.44 442.081   1
  12  -3 -11 205.778 263.482   1
  12   3 -11 8.19123 165.814   5
 -12  -3  11-10.4477 87.9030   2
  12  -3 -10 942.537 476.952   1
  12   3 -10 614.443 321.609   5
 -12  -3  10 444.323 212.414   2
 -12  -3   9 468.011 222.477   2
  12  -3  -9 1097.07 479.143   1
  12   3  -9 646.138 345.367   5
  12  -3  -8 1052.67 431.520   1
 -12  -3   8 834.683 293.782   2
 -12  -3   7-161.201 244.535   4
 -12  -3   7 288.120 189.004   2
  12  -3  -7-90.1182 194.828   1
 -12  -3   6 627.900 269.369   2
 -12  -3   6 956.960 471.674   4
  12  -3  -6 1229.04 539.683   1
 -12  -3   5 6026.40 1083.15   4
 -12  -3   5 6763.14 890.415   2
 -12  -3   4 734.717 329.116   2
 -12  -3   4 1082.96 436.884   4
 -12   3   4 640.293 182.605   2
 -12  -3   3 4259.02 761.534   2
 -12  -3   3 3586.21 817.031   4
 -12   3   3 4757.69 946.623   2
 -12  -3   2 824.015 309.815   2
 -12  -3   2 666.273 346.409   4
 -12   3   2 821.374 386.961   2
 -12  -3   1 780.741 284.623   4
 -12   3   1 1333.35 451.699   2
 -12  -3   1 630.458 332.610   2
 -12   3   0 5921.14 1029.29   2
 -12  -3   0 5655.66 997.705   2
 -12  -3   0 7537.12 1196.97   4
 -12  -3  -1 1684.43 491.974   2
 -12   3  -1 1578.32 532.625   2
 -12  -3  -1 1459.09 526.679   4
 -12   3  -2 4141.16 880.994   2
 -12  -3  -2 3905.41 882.139   2
 -12   3  -3 3268.11 771.919   2
 -12  -3  -3 2634.40 737.586   2
 -12   3  -4 4662.94 882.679   2
 -12  -3  -4 4040.30 902.345   2
 -12   3  -4 4466.83 1050.78   5
 -12   3  -5 4602.60 854.836   2
 -12   3  -5 5607.76 1137.22   5
 -12   3  -6 10212.7 1593.55   5
 -12   3  -6 10044.9 1269.37   2
 -12   3  -7 1596.91 536.145   2
 -12   3  -7 2417.67 825.681   5
 -12   3  -8 2271.72 628.099   2
 -12   3  -8 1710.42 639.650   5
 -12   3  -9 3981.00 832.277   2
 -12   3  -9 4370.92 1109.51   5
 -12   3 -10 1599.89 540.469   2
 -12   3 -10 1734.18 716.316   5
 -12   3 -11 10259.1 1729.53   5
 -12   3 -11 9381.08 1335.82   2
 -12   3 -12 1184.43 616.636   5
 -12   3 -12 1276.15 494.989   2
 -12   3 -13 921.447 493.218   5
 -12   3 -13 425.469 297.569   2
 -12   3 -14 146.592 334.237   5
 -12   3 -15 318.380 332.207   5
 -12   3 -16 312.676 519.362   5
 -12   3 -17 534.624 439.558   5
  12  -4 -24 658.516 446.715   1
  12   4 -23 317.877 281.295   5
  12  -4 -23 224.970 275.671   1
  12   4 -22 324.994 164.870   5
  12  -4 -22 208.608 249.289   1
  12   4 -21 471.579 222.689   5
  12  -4 -21 820.117 455.006   1
  12   4 -20 3586.83 1008.37   5
  12  -4 -20 2301.66 843.845   1
  12  -4 -19 303.115 301.164   1
  12   4 -19 92.9672 155.257   5
  12   4 -18 38.9930 178.865   5
  12  -4 -18 117.876 287.955   1
  12  -4 -17 288.815 328.903   1
  12   4 -17 145.175 225.427   5
  12  -4 -16 3973.42 1076.85   1
  12   4 -16 3042.37 864.350   5
  12  -4 -15 1133.12 583.375   1
  12   4 -15 1755.03 608.504   5
  12   4 -14 608.930 372.052   5
  12  -4 -14 852.138 504.879   1
  12   4 -13 989.981 427.933   5
  12  -4 -13 1064.40 518.322   1
  12  -4 -12 346.316 403.673   1
  12   4 -12 222.315 234.129   5
  12   4 -11 907.921 389.653   5
  12  -4 -11 1277.51 609.491   1
 -12  -4  10 302.572 267.546   4
  12   4 -10 910.617 409.241   5
  12  -4 -10 1113.66 569.169   1
 -12  -4   9 326.357 319.298   4
  12   4  -9 198.205 204.689   5
 -12  -4   8 756.981 465.818   4
 -12  -4   7-343.176 388.221   4
 -12  -4   6 143.350 265.809   4
 -12  -4   5 2861.62 830.385   4
 -12  -4   4 2169.32 729.011   4
 -12   4   4 454.658 202.707   2
 -12  -4   3 1967.60 707.337   4
 -12   4   3 1446.56 549.471   2
 -12  -4   2 200.491 282.746   4
 -12   4   2-154.599 348.735   2
 -12  -4   1 4979.17 1056.83   4
 -12   4   1 4793.07 1022.73   2
 -12  -4   0 2810.47 854.821   4
 -12   4   0 1768.34 597.613   2
 -12  -4  -1-10.1337 269.132   4
 -12   4  -1 1052.92 500.087   2
 -12   4  -2-72.7713 218.345   2
 -12   4  -2-90.9125 254.270   5
 -12   4  -3 1726.47 578.518   2
 -12   4  -3 1681.92 766.670   5
 -12   4  -4 4615.53 899.232   2
 -12   4  -4 6803.70 1381.52   5
 -12   4  -5 299.093 222.222   2
 -12   4  -5-95.7354 377.482   5
 -12   4  -6 322.071 203.023   2
 -12   4  -6 1018.75 532.464   5
 -12   4  -7 1890.14 752.505   5
 -12   4  -8 2782.66 885.330   5
 -12   4  -9 897.462 579.065   5
 -12   4 -10-293.118 276.507   5
 -12   4 -11-461.945 396.181   5
 -12   4 -12 1461.86 649.440   5
 -12   4 -13-203.831 323.948   5
 -12   4 -14 989.649 585.528   5
  12   5 -21-108.036 199.495   5
  12   5 -20 471.675 410.258   5
  12  -5 -20-217.334 449.571   1
  12  -5 -19 111.836 171.382   1
  12   5 -19-77.4588 162.897   5
  12  -5 -18 345.786 265.124   1
  12  -5 -17 104.205 135.523   1
  12  -5 -16 17.2882 113.880   1
  12  -5 -15 3375.57 1044.08   1
 -12  -5  14-152.506 425.556   4
  12  -5 -14 316.189 266.837   1
 -12  -5  13 2086.08 874.825   4
 -12  -5  12 984.839 584.006   4
 -12  -5  11 4176.42 1184.65   4
 -12  -5  10 228.034 362.646   4
 -12  -5   9 178.558 353.101   4
 -12  -5   8 644.133 512.673   4
 -12  -5   7 164.762 183.983   4
 -12  -5   6 140.833 93.2668   4
 -12  -5   5 1757.11 647.882   4
 -12  -5   4-17.7649 94.9225   4
 -12   5   4-450.718 452.868   2
 -12  -5   3-193.391 111.892   4
 -12   5   3 314.438 310.272   2
 -12  -5   2 197.073 343.594   4
 -12   5   2 1139.20 612.658   2
 -12  -5   1-141.968 198.778   4
 -12   5   1 13.7499 208.545   2
 -12   5   0 391.267 346.519   2
 -12   5   0 317.338 217.984   5
 -12  -5   0 1.74707 336.698   4
 -12   5  -1 2741.54 919.865   5
 -12   5  -2 208.149 371.288   5
 -12   5  -3-69.1428 317.838   5
 -12   5  -4 270.819 360.758   5
 -12   5  -5 64.0189 202.490   5
 -12   5  -6-252.683 372.377   5
 -12   5  -7-266.142 278.559   5
 -12   5  -8-264.050 329.339   5
 -12   5  -9-203.021 227.526   5
 -12   5 -10-278.631 342.426   5
 -12  -6  11 955.350 610.262   4
 -12  -6  10 243.563 473.923   4
 -12  -6   9 182.486 342.478   4
 -12  -6   8-435.649 473.356   4
 -12  -6   7-300.362 336.817   4
 -12  -6   6 845.886 543.115   4
 -12  -6   5-297.808 460.652   4
 -12  -6   4 1441.48 720.069   4
 -12  -6   3-210.696 339.176   4
 -12   6   3 252.361 382.279   5
 -12  -6   2 377.963 368.636   4
 -12   6   2 181.245 200.955   5
 -12   6   1 404.452 435.170   5
 -12  -6   1-412.910 385.120   4
 -12   6   0 127.293 227.196   5
 -12   6  -1 868.655 579.945   5
 -12   6  -2 183.837 228.597   5
 -12   6  -3 431.012 350.993   5
 -12   6  -4 633.890 466.814   5
 -12   6  -5 383.039 446.475   5
 -12   6  -6 313.695 365.590   5
 -13   0  28 1870.75 1183.05   3
  13   0 -27 663.062 489.158   5
 -13   0  27 1888.32 1205.06   3
  13   0 -26-77.3547 219.216   5
 -13   0  26 672.439 609.883   3
  13   0 -25-10.5788 130.169   5
 -13   0  25 626.759 591.401   3
 -13   0  24 1294.48 698.007   3
  13   0 -24-77.1482 74.0177   5
  13   0 -23 585.538 378.487   5
 -13   0  23 546.011 363.401   3
  13   0 -22 535.353 490.100   5
 -13   0  22 934.255 719.498   3
  13   0 -21 3989.44 1058.61   5
 -13   0  21 4465.54 1161.00   3
 -13   0  20 1755.69 718.047   3
 -13   0  19 9368.20 1472.71   3
 -13   0  18 569.250 468.465   3
 -13   0  17 12596.4 1639.83   3
 -13   0  16 807.029 508.195   3
 -13   0  15 9435.30 1282.43   3
 -13   0  14 205.064 293.678   3
 -13   0  13 4622.90 834.009   3
 -13   0  12-8.99969 127.523   3
 -13   0  11 23909.9 1758.03   3
 -13   0  10-59.5853 155.827   3
 -13   0   9 258.925 85.2008   3
 -13   0   9 1.06068 214.118   2
 -13   0   8 383.299 273.321   3
 -13   0   8 94.1976 430.070   2
 -13   0   7 26990.3 2042.36   2
 -13   0   7 23054.1 1414.05   3
 -13   0   6 71.0538 170.731   2
 -13   0   5 229.460 267.986   2
  13   0  -5 93.7360 128.730   1
 -13   0   4 46.2348 88.6744   4
  13   0  -4 137.731 123.875   1
  13   0  -4 92.1089 103.322   3
 -13   0   4 240.932 325.522   2
 -13   0   3 1246.78 274.474   4
  13   0  -3 1130.70 254.695   3
 -13   0   3 496.609 281.485   2
  13   0  -3 1632.77 405.523   1
  13   0  -2-242.680 125.129   3
  13   0  -2 39.7078 112.218   1
 -13   0   2 217.522 323.320   2
 -13   0   2 8.43376 52.8799   4
  13   0  -1 1259.79 365.051   1
  13   0  -1 529.774 174.160   3
 -13   0   1 1261.17 444.046   2
 -13   0   0 1283.45 473.617   2
 -13   0  -1 3725.35 730.677   2
  13   0   2-44.4410 36.6786   4
 -13   0  -2 3.70834 213.054   2
 -13   0  -3 50163.8 2795.43   2
 -13   0  -4 150.067 376.321   2
 -13   0  -5 5118.97 926.802   2
 -13   0  -5 5433.82 918.438   5
 -13   0  -6 483.341 369.291   2
 -13   0  -6 224.622 245.979   5
 -13   0  -7-37.3617 192.011   2
 -13   0  -7 46.1790 190.849   5
 -13   0  -8 587.557 422.101   2
 -13   0  -8 252.501 238.933   5
 -13   0  -9 201.723 119.584   2
 -13   0  -9-130.230 198.851   5
 -13   0 -10-119.959 269.318   5
 -13   0 -10-163.596 143.411   2
 -13   0 -11 3062.61 779.177   5
 -13   0 -11 3443.64 914.021   2
 -13   0 -12-216.410 372.749   5
 -13   0 -12-178.714 233.535   2
 -13   0 -13 994.097 459.408   5
 -13   0 -13 708.504 486.554   2
 -13   0 -14 99.1936 239.370   2
 -13   0 -14-87.9592 117.623   5
 -13   0 -15 13188.3 1787.67   5
 -13   0 -16 350.552 320.924   5
 -13   0 -17 154.289 257.078   5
 -13   0 -18-176.736 230.800   5
 -13   0 -19 805.544 487.918   5
 -13   0 -20 281.400 266.796   5
 -13  -1  27 819.162 753.951   3
  13   1 -27 59.4436 74.5835   5
  13   1 -26-259.064 270.272   5
 -13  -1  26 1310.01 1038.12   3
  13   1 -25 858.191 495.206   5
 -13  -1  25 535.736 545.289   3
  13   1 -24-331.210 468.308   5
 -13  -1  24-122.170 452.685   3
  13   1 -23 20.7128 122.032   5
 -13  -1  23 919.261 636.685   3
 -13  -1  22 1214.48 709.435   3
  13   1 -22 818.291 502.771   5
  13   1 -21 2572.88 835.309   5
 -13  -1  21 3316.74 1005.50   3
  13   1 -20 1063.22 510.471   5
 -13  -1  20 1370.81 580.779   3
  13   1 -19 260.753 204.015   5
 -13  -1  19 646.056 504.789   3
  13   1 -18-15.4403 353.154   5
 -13  -1  18 248.507 258.485   3
  13   1 -17 2659.83 776.722   5
 -13  -1  17 2197.47 636.888   3
 -13  -1  16 22412.4 2137.45   3
  13   1 -16 19662.3 2051.71   5
  13   1 -15 25944.0 2299.98   5
 -13  -1  15 22797.9 2115.06   3
 -13  -1  14 1352.39 417.503   3
 -13  -1  13 1539.45 533.917   3
 -13  -1  12-26.3919 218.778   3
 -13  -1  12-74.4087 207.394   2
 -13  -1  11 2338.10 584.290   3
 -13  -1  11 1925.34 557.475   2
 -13  -1  10 181.728 141.174   3
 -13  -1  10 345.129 223.141   2
 -13   1  10 484.149 242.383   3
 -13  -1   9 3877.91 765.657   2
 -13   1   9 4475.77 631.019   3
 -13  -1   8 64.3890 235.093   2
  13  -1  -8-123.356 149.668   1
 -13   1   8 187.300 188.197   3
  13  -1  -7 2654.49 601.256   1
 -13   1   7 1645.07 321.116   3
 -13   1   7 1215.86 346.619   2
 -13  -1   7 1500.28 512.061   2
 -13   1   6 1112.46 238.088   3
 -13   1   6 993.148 368.282   2
 -13  -1   6 1123.15 426.298   2
 -13  -1   5 4337.34 682.260   4
 -13   1   5 5573.67 964.270   2
 -13  -1   5 5008.16 829.023   2
 -13   1   4 9357.81 1238.62   2
 -13  -1   4 7487.19 996.540   2
 -13  -1   4 7877.07 906.541   4
 -13   1   3 2949.22 682.233   2
 -13  -1   3 1880.64 438.555   4
 -13  -1   3 1977.35 520.814   2
  13   1  -3 2000.65 397.192   1
 -13  -1   2 55.4191 131.601   4
  13   1  -2 94.2886 69.2682   1
 -13  -1   2 32.2553 101.808   2
 -13   1   2 139.381 258.648   2
 -13  -1   1-4.32572 126.829   4
  13   1  -1 16.8778 73.5977   1
 -13  -1   1 78.3820 174.626   2
 -13   1   1 159.709 222.771   2
 -13  -1   0 1134.95 360.851   2
 -13   1   0 1137.21 421.741   2
 -13  -1  -1 4130.74 782.313   2
 -13   1  -1 4652.38 801.460   2
 -13  -1  -2 977.124 376.931   2
 -13   1  -2 1073.08 454.739   2
 -13  -1  -3 3012.43 700.361   2
  13  -1   3 3619.44 343.707   3
 -13   1  -3 3167.59 676.270   2
 -13  -1  -4 58.8630 226.572   2
 -13   1  -4-57.8000 157.250   2
  13  -1   4 103.023 113.302   3
 -13  -1  -4-44.0010 160.400   5
 -13  -1  -5 6247.66 901.119   5
 -13   1  -5 8117.70 1220.96   5
 -13  -1  -5 8479.60 1237.50   2
 -13   1  -5 7567.78 1120.83   2
 -13  -1  -6 286.418 241.551   2
 -13   1  -6 1559.64 563.267   2
 -13  -1  -6 1007.29 372.541   5
 -13   1  -6 734.092 370.176   5
 -13  -1  -7 4547.08 984.378   2
 -13   1  -7 4519.58 902.059   2
 -13  -1  -7 4768.87 832.679   5
 -13   1  -7 3747.77 860.056   5
 -13   1  -8-16.4405 157.277   2
 -13  -1  -8 247.191 155.089   5
 -13   1  -8 486.850 375.440   5
 -13  -1  -8 571.663 362.306   2
 -13   1  -9 473.281 383.978   2
 -13  -1  -9-105.546 138.721   5
 -13   1  -9 124.830 150.860   5
 -13  -1  -9 269.632 235.277   2
 -13   1 -10 6997.57 1226.69   2
 -13  -1 -10 7411.83 1148.72   5
 -13   1 -10 7650.59 1323.71   5
 -13  -1 -10 6683.57 1271.25   2
 -13   1 -11 392.706 348.319   2
 -13  -1 -11-8.14784 164.487   5
 -13   1 -11-24.0144 198.784   5
 -13  -1 -11 321.954 289.701   2
 -13  -1 -12 463.913 238.924   2
 -13  -1 -12 218.862 250.635   5
 -13   1 -12 289.531 232.421   5
 -13   1 -12 176.082 222.892   2
 -13  -1 -13-13.8768 122.004   5
 -13   1 -13 61.7827 81.6391   5
 -13  -1 -14 696.542 335.921   5
 -13   1 -14 722.198 465.928   5
 -13   1 -14 1074.18 594.370   2
 -13   1 -15 3716.48 1020.75   2
 -13   1 -15 3341.89 920.431   5
 -13   1 -16-9.59646 120.592   5
 -13   1 -17 105.212 126.804   5
 -13   1 -18-80.8878 221.929   5
 -13   1 -19 116.941 130.028   5
 -13   1 -20-34.7192 105.979   5
  13   2 -26 85.2825 190.785   5
 -13  -2  26 771.456 634.302   3
  13   2 -25 6.18148 219.016   5
 -13  -2  25-299.709 482.326   3
  13   2 -24-269.656 359.627   5
 -13  -2  24-461.963 349.751   3
  13   2 -23 700.270 525.069   5
 -13  -2  23 103.721 356.341   3
  13   2 -22 1255.24 618.570   5
 -13  -2  22 112.694 460.104   3
  13   2 -21 892.858 539.257   5
 -13  -2  21 169.596 246.942   3
  13   2 -20 511.934 385.037   5
 -13  -2  20 470.599 389.393   3
 -13  -2  19 3223.94 909.480   3
  13   2 -19 3655.27 933.946   5
 -13  -2  18 790.764 421.813   3
  13   2 -18-379.964 446.615   5
 -13  -2  17 1356.53 564.737   3
  13   2 -17 1287.28 530.276   5
 -13  -2  17 1340.28 507.731   2
 -13  -2  16 3226.71 856.381   3
  13   2 -16 2989.17 791.352   5
 -13  -2  16 2513.33 621.461   2
 -13  -2  15 3104.12 811.268   3
  13   2 -15 2714.17 721.550   5
 -13  -2  15 3785.88 755.424   2
 -13  -2  14 43.3392 71.8090   2
 -13  -2  14-403.591 529.017   3
  13  -2 -14 51.1909 218.496   1
  13   2 -14-53.5971 205.751   5
 -13  -2  13 42.7641 79.9394   2
  13   2 -13-58.5257 167.269   5
  13  -2 -13 237.437 304.209   1
 -13  -2  12 1549.20 444.980   2
  13  -2 -12 1237.53 487.025   1
  13   2 -12 1077.56 478.531   5
  13  -2 -11 12810.7 1563.26   1
 -13  -2  11 13256.2 1283.35   2
  13  -2 -10 932.124 417.112   1
 -13  -2  10 1082.83 371.370   2
  13  -2  -9 4326.01 891.912   1
 -13  -2   9 3683.86 663.431   2
 -13  -2   8 21338.1 1584.14   2
  13  -2  -8 24813.2 2117.15   1
 -13  -2   7 7145.27 911.968   2
  13  -2  -7 6885.34 1105.69   1
 -13   2   6 332.330 153.214   4
 -13  -2   6 259.311 229.737   4
 -13  -2   6 355.546 186.564   2
  13  -2  -6 484.086 312.280   1
  13  -2  -5 6322.88 1047.84   1
 -13   2   5 6748.45 1138.01   2
 -13  -2   5 5616.15 839.698   2
 -13   2   5 5475.43 504.972   4
 -13  -2   5 6835.05 1013.25   4
  13  -2  -4 11675.7 1444.24   1
 -13   2   4 16418.8 1717.36   2
 -13  -2   4 11544.3 1201.18   2
 -13  -2   4 14133.5 1442.01   4
 -13  -2   3 1539.08 465.705   4
 -13   2   3 1637.47 488.879   2
 -13  -2   3 1675.53 447.749   2
 -13  -2   2 2712.86 600.547   4
 -13   2   2 2495.59 706.817   2
 -13  -2   2 2625.19 602.413   2
 -13  -2   1 5255.73 860.094   2
  13   2  -1 5287.14 471.603   1
 -13  -2   1 5930.19 932.541   4
 -13   2   1 6385.36 1017.87   2
 -13  -2   0 3686.94 755.468   2
 -13   2   0 4248.39 890.966   2
 -13  -2   0 5326.75 891.657   4
 -13  -2  -1 6350.77 1007.63   2
 -13   2  -1 9146.44 1214.99   2
 -13  -2  -2 4603.35 881.314   2
 -13   2  -2 5641.02 938.942   2
 -13  -2  -3 10138.8 972.720   5
 -13  -2  -3 11157.6 1433.12   2
 -13   2  -3 11231.5 1355.70   2
 -13  -2  -4 375.091 217.242   2
 -13   2  -4 759.965 346.704   2
 -13  -2  -4 373.203 190.592   5
 -13  -2  -5 13413.1 1160.72   5
 -13   2  -5 14522.0 1790.28   5
 -13  -2  -5 17191.2 1900.44   2
 -13   2  -5 15536.4 1594.49   2
 -13   2  -6 468.407 193.424   2
 -13  -2  -6 576.375 259.969   5
 -13   2  -6 530.593 246.934   5
 -13  -2  -6 1381.91 628.947   2
 -13   2  -7 5128.25 960.616   2
 -13   2  -7 4283.68 995.752   5
 -13  -2  -7 4017.36 965.041   2
 -13   2  -8 2442.66 675.501   2
 -13  -2  -8 2058.49 742.617   2
 -13   2  -8 902.431 435.077   5
 -13   2  -9 774.678 387.921   2
 -13  -2  -9 38.1018 132.010   2
 -13   2  -9 285.685 289.483   5
 -13   2 -10-58.6324 131.911   2
 -13   2 -10 66.1034 267.313   5
 -13   2 -11 2224.18 673.216   2
 -13   2 -11 2152.58 730.038   5
 -13   2 -12-202.917 263.984   5
 -13   2 -12-162.192 165.955   2
 -13   2 -13 1164.68 597.257   5
 -13   2 -13 624.309 373.627   2
 -13   2 -14 525.072 424.698   5
 -13   2 -14 907.675 466.945   2
 -13   2 -15 504.593 420.596   5
 -13   2 -15-112.141 269.929   2
 -13   2 -16 357.214 318.621   5
 -13   2 -17-11.8012 187.544   5
 -13   2 -18-93.9425 197.561   5
  13   3 -25-60.8634 223.504   5
  13  -3 -25 289.837 383.269   1
  13   3 -24-72.1611 227.477   5
  13  -3 -24-243.331 287.092   1
 -13  -3  23-273.555 384.440   3
  13   3 -23 73.0016 231.593   5
  13  -3 -23-220.817 362.537   1
 -13  -3  22-143.259 443.356   3
  13   3 -22 667.666 484.618   5
  13  -3 -22-37.5859 213.077   1
  13  -3 -21 96.7336 132.258   1
 -13  -3  21 45.4664 283.387   3
  13   3 -21 315.844 358.467   5
  13  -3 -20 217.641 296.542   1
  13   3 -20 125.683 144.527   5
  13  -3 -19-122.553 100.215   1
  13   3 -19 218.745 202.402   5
  13  -3 -18 32.0815 222.219   1
  13   3 -18-59.9297 146.502   5
  13  -3 -17-18.4039 122.200   1
  13   3 -17 9.38695 81.3309   5
  13  -3 -16 1686.56 685.666   1
  13   3 -16 1073.20 488.975   5
  13   3 -15 519.503 286.616   5
  13  -3 -15 771.578 447.172   1
  13  -3 -14 5576.72 1167.98   1
  13   3 -14 4037.55 891.522   5
  13   3 -13 3.97194 111.642   5
  13  -3 -13 909.745 476.570   1
  13   3 -12 6605.30 1081.59   5
  13  -3 -12 5692.51 1144.54   1
  13  -3 -11 874.811 515.062   1
  13   3 -11 584.434 327.136   5
 -13  -3  11 448.506 232.361   2
  13  -3 -10 65.8082 261.680   1
 -13  -3  10-13.4318 104.703   2
 -13  -3   9 122.300 178.473   2
  13  -3  -9-38.6487 215.716   1
 -13  -3   8 659.578 291.649   4
 -13  -3   8 820.975 314.026   2
  13  -3  -8 885.929 338.918   1
 -13  -3   7 3269.50 847.500   4
 -13  -3   7 2695.70 554.715   2
  13  -3  -7 3428.08 855.408   1
 -13  -3   6-170.405 344.811   4
 -13  -3   6-30.0058 43.5838   2
  13  -3  -6-14.0450 148.811   1
 -13  -3   5 1397.36 506.462   4
 -13  -3   5 1034.74 359.098   2
 -13   3   5 1264.19 474.932   2
 -13  -3   4 721.461 329.489   2
 -13  -3   4 236.451 169.613   4
 -13   3   4 905.908 327.894   2
 -13  -3   3 4822.22 825.229   2
 -13  -3   3 5095.26 1002.68   4
 -13   3   3 7408.05 1257.58   2
 -13   3   2 17580.4 1861.65   2
 -13  -3   2 15596.5 1567.02   2
 -13  -3   2 19416.4 1900.15   4
 -13  -3   1 215.627 206.715   4
 -13   3   1 224.998 233.992   2
 -13  -3   1 354.522 296.415   2
 -13  -3   0 996.182 406.099   4
 -13  -3   0 483.572 284.042   2
 -13   3   0 924.350 446.346   2
 -13  -3  -1 7444.91 1203.65   2
 -13   3  -1 6806.71 1110.75   2
 -13  -3  -2 40935.0 2896.69   2
 -13   3  -2 48697.7 2906.02   2
 -13  -3  -3 34570.9 2727.04   2
 -13   3  -3 37272.7 2549.73   2
 -13   3  -4 13858.0 1876.04   5
 -13  -3  -4 9988.03 1513.31   2
 -13   3  -4 10653.9 1360.45   2
 -13   3  -5 1651.58 502.415   2
 -13  -3  -5 1730.89 574.076   2
 -13   3  -5 2269.25 777.558   5
 -13   3  -6-129.829 233.389   2
 -13   3  -6-319.831 541.785   5
 -13   3  -7 3707.61 791.470   2
 -13   3  -7 2550.65 815.006   5
 -13   3  -8 3659.12 838.268   2
 -13   3  -8 4150.50 1058.55   5
 -13   3  -9 7186.85 1165.03   2
 -13   3  -9 8181.30 1520.03   5
 -13   3 -10 2932.10 759.217   2
 -13   3 -10 3163.67 980.071   5
 -13   3 -11 7.82230 98.8517   2
 -13   3 -11 292.000 98.5882   5
 -13   3 -12 447.943 354.272   2
 -13   3 -12 1491.27 746.128   5
 -13   3 -13 255.879 365.392   5
 -13   3 -14 372.964 480.147   5
 -13   3 -15 460.292 399.530   5
 -13   3 -16 799.715 535.526   5
  13   4 -23-109.146 107.727   5
  13  -4 -23-320.932 331.020   1
  13   4 -22 761.028 461.078   5
  13  -4 -22 478.962 533.696   1
  13   4 -21 1643.46 692.494   5
  13  -4 -21 1550.22 708.776   1
  13   4 -20 1162.38 578.988   5
  13  -4 -20 1317.75 682.820   1
  13   4 -19 524.721 398.804   5
  13  -4 -19-36.9408 126.365   1
  13   4 -18 857.448 483.960   5
  13  -4 -18 386.564 428.725   1
  13  -4 -17 530.446 318.295   1
  13   4 -17 1286.04 566.074   5
  13  -4 -16 5596.89 1284.16   1
  13   4 -16 6258.97 1207.09   5
  13   4 -15 1165.25 473.218   5
  13  -4 -15 1210.74 576.750   1
  13   4 -14 495.313 335.424   5
  13  -4 -14 534.592 442.067   1
  13   4 -13 74.5020 133.381   5
  13  -4 -13-28.0896 130.635   1
  13  -4 -12 5267.80 1206.14   1
  13   4 -12 3572.20 818.258   5
  13   4 -11-103.275 167.203   5
  13  -4 -11 506.720 378.152   1
 -13  -4  11 428.235 339.576   4
  13  -4 -10 479.876 376.640   1
 -13  -4  10 555.379 509.140   4
  13   4 -10 195.500 127.487   5
 -13  -4   9 1336.67 621.546   4
 -13  -4   8 780.133 443.257   4
 -13  -4   7 968.874 543.261   4
 -13  -4   6 688.537 504.072   4
 -13  -4   5 803.313 428.629   4
 -13   4   5 1319.25 534.460   2
 -13  -4   4 534.321 405.316   4
 -13   4   4 288.910 149.323   2
 -13  -4   4 368.743 252.770   2
 -13  -4   3 904.072 477.871   4
 -13   4   3 900.947 307.391   2
 -13  -4   3 462.973 277.179   2
 -13  -4   2 3728.55 967.574   4
 -13   4   2 5898.40 1204.36   2
 -13  -4   1 5904.66 1181.38   4
 -13   4   1 6679.61 1213.18   2
 -13  -4   0 16386.5 1967.19   4
 -13   4   0 21056.2 2122.79   2
 -13   4  -1 1030.99 473.637   2
 -13   4  -2 8754.18 1321.11   2
 -13   4  -2 10612.5 1738.81   5
 -13   4  -3 1135.88 450.832   2
 -13   4  -3 541.989 248.185   5
 -13   4  -4 3292.20 791.329   2
 -13   4  -4 3388.81 985.274   5
 -13   4  -5 528.825 347.875   2
 -13   4  -5 466.989 455.400   5
 -13   4  -6 4465.27 903.897   2
 -13   4  -6 7594.40 1532.87   5
 -13   4  -7 471.924 351.840   5
 -13   4  -8 1055.35 603.113   5
 -13   4  -9 232.171 338.384   5
 -13   4 -10-72.3168 294.259   5
 -13   4 -11-239.202 423.407   5
 -13   4 -12-288.034 363.129   5
 -13   4 -13 733.562 493.704   5
  13  -5 -19 202.781 293.503   1
  13  -5 -18 83.8396 184.208   1
  13  -5 -17 126.064 173.079   1
  13  -5 -16 164.079 313.386   1
 -13  -5  15 1839.92 949.907   4
  13  -5 -15 2130.86 870.635   1
 -13  -5  14 1911.10 843.608   4
 -13  -5  13 1687.29 857.919   4
 -13  -5  12 1241.24 695.035   4
 -13  -5  11-68.9545 81.6582   4
 -13  -5  10 89.8588 118.665   4
 -13  -5   9 103.238 207.951   4
 -13  -5   8 287.180 371.610   4
 -13  -5   7-82.4793 244.257   4
 -13  -5   6 88.4039 311.328   4
 -13  -5   5 1987.77 790.134   4
 -13   5   5 2164.08 815.356   2
 -13  -5   4 288.461 278.058   4
 -13   5   4-305.114 403.258   2
 -13  -5   3 275.408 373.050   4
 -13   5   3-511.165 447.539   2
 -13  -5   2 485.735 420.417   4
 -13   5   2 237.795 346.192   2
 -13  -5   1-179.096 371.364   4
 -13   5   1 187.385 268.152   2
 -13   5   0-125.228 380.886   5
 -13  -5   0 77.6627 180.847   4
 -13   5  -1 940.787 569.889   5
 -13   5  -2-157.293 260.261   5
 -13   5  -3 13.8105 109.961   5
 -13   5  -4-152.605 169.236   5
 -13   5  -5 351.555 450.251   5
 -13   5  -6 919.937 547.151   5
 -13   5  -7-215.052 295.943   5
 -13   5  -8 55.5825 286.885   5
 -13   5  -9 252.489 182.374   5
 -13  -6   9-190.136 361.978   4
 -13  -6   8 538.678 430.516   4
 -13  -6   7-157.031 235.071   4
 -13  -6   6 95.3864 97.9162   4
 -13  -6   5 733.593 548.433   4
 -13  -6   4 2.94235 151.455   4
 -13  -6   3 20.4240 104.919   4
 -13   6   3-303.384 353.624   5
 -13  -6   2 117.014 233.514   4
 -13   6   2-200.361 122.926   5
 -13   6   1 45.0350 230.808   5
 -13   6   0 894.203 596.807   5
 -13   6  -1-389.205 404.072   5
 -13   6  -2 1772.83 873.250   5
 -13   6  -3 336.978 413.790   5
 -13   6  -4-2.64175 181.817   5
 -13   6  -5 191.097 382.450   5
 -14   0  27 629.624 691.005   3
 -14   0  26 1608.36 952.142   3
 -14   0  25 1173.38 790.148   3
 -14   0  24 4706.93 1415.77   3
 -14   0  23 433.165 537.912   3
 -14   0  22 3086.09 964.807   3
 -14   0  21 48.8622 429.109   3
 -14   0  20 1338.08 631.882   3
 -14   0  19 1137.03 580.225   3
 -14   0  18 17585.2 1999.57   3
 -14   0  17 4.35552 183.576   3
 -14   0  16 21671.2 2048.60   3
 -14   0  15-29.6165 235.227   3
 -14   0  14 1949.84 579.275   3
 -14   0  13 402.234 374.290   3
 -14   0  12 1951.39 517.606   3
 -14   0  11-168.994 230.179   3
 -14   0  10 21.5090 109.378   3
 -14   0  10-25.3181 289.407   2
 -14   0   9-209.488 218.764   3
 -14   0   9 42.1551 294.677   2
 -14   0   8 2366.00 467.439   3
 -14   0   8 2640.33 652.307   2
 -14   0   7 410.471 334.601   2
 -14   0   6 47915.6 2785.77   2
 -14   0   5-105.532 222.484   2
 -14   0   5 9.22687 75.5054   4
  14   0  -4 10843.2 841.573   3
 -14   0   4 14901.1 1524.41   2
 -14   0   4 13471.8 949.752   4
  14   0  -3-28.1263 331.902   1
  14   0  -3 117.484 170.504   3
 -14   0   3 553.751 561.969   2
  14   0  -2 1362.65 372.177   1
  14   0  -2 991.795 246.626   3
  14   0  -1-73.4616 114.714   3
 -14   0   1-95.3157 65.6180   2
 -14   0   0 2756.79 678.176   2
 -14   0  -1 96.6700 138.573   2
 -14   0  -2 311.134 279.054   2
 -14   0  -3 543.885 327.066   2
 -14   0  -4 1347.11 478.578   2
 -14   0  -5 360.904 399.804   2
 -14   0  -5 144.320 217.024   5
 -14   0  -6 13636.4 1548.64   5
 -14   0  -6 13192.1 1557.14   2
 -14   0  -7 128.459 363.026   2
 -14   0  -7-185.985 83.8718   5
 -14   0  -8 3263.22 874.168   2
 -14   0  -8 3411.35 819.165   5
 -14   0  -9-36.3789 115.891   2
 -14   0  -9 151.087 257.888   5
 -14   0 -10 3997.01 914.969   5
 -14   0 -10 4418.75 1021.40   2
 -14   0 -11-104.769 240.962   5
 -14   0 -11-258.410 193.595   2
 -14   0 -12 3394.05 849.161   5
 -14   0 -12 3836.12 1032.75   2
 -14   0 -13-316.022 265.264   5
 -14   0 -13 17.1465 137.061   2
 -14   0 -14 5349.60 1266.61   2
 -14   0 -14 2505.85 729.016   5
 -14   0 -15 430.844 382.055   5
 -14   0 -16-73.8914 140.099   5
 -14   0 -17 6.37673 183.640   5
 -14   0 -18 537.398 354.818   5
 -14   0 -19-85.4709 166.651   5
  14   1 -27 2176.28 846.270   5
 -14  -1  27 4912.75 1484.46   3
 -14   1  27 4646.18 1693.27   3
  14   1 -26 1197.92 689.859   5
 -14  -1  26 2357.23 1114.86   3
  14   1 -25 6061.52 1392.09   5
 -14  -1  25 2324.55 921.445   3
  14   1 -24 1889.73 723.676   5
 -14  -1  24 4161.97 1198.05   3
  14   1 -23 5339.02 1246.33   5
 -14  -1  23 5665.45 1394.54   3
  14   1 -22 373.143 460.863   5
 -14  -1  22 911.311 588.317   3
  14   1 -21-61.5903 211.227   5
 -14  -1  21 268.953 377.688   3
  14   1 -20 2654.40 787.948   5
 -14  -1  20 1720.09 638.028   3
  14   1 -19 585.955 354.370   5
 -14  -1  19 435.722 340.531   3
 -14  -1  18 2189.25 624.997   3
  14   1 -18 3328.70 852.443   5
 -14  -1  17 4426.79 940.715   3
 -14  -1  16 15774.3 1833.15   3
 -14  -1  15-589.390 370.125   3
 -14  -1  14-67.2237 275.520   3
 -14  -1  13 2950.66 722.174   3
 -14  -1  13 3458.94 770.369   2
 -14   1  13 3896.65 722.689   3
 -14  -1  12 9475.01 1275.86   2
 -14  -1  12 9125.13 1235.30   3
 -14   1  12 9899.72 1108.04   3
 -14  -1  11-120.702 148.500   2
 -14   1  11 278.003 239.669   3
 -14  -1  10 578.354 318.568   2
 -14   1  10 627.101 281.573   3
  14  -1  -9 2854.64 662.301   1
 -14  -1   9 2612.08 637.009   2
 -14   1   9 2443.68 470.735   3
 -14  -1   8 464.651 339.687   2
  14  -1  -8 603.486 335.631   1
 -14   1   8 335.733 171.091   3
 -14   1   8-19.3130 335.948   2
 -14   1   7 8148.88 1240.76   2
 -14   1   7 7984.66 716.747   3
  14  -1  -7 8744.65 1142.98   1
 -14  -1   7 8979.71 1169.45   2
 -14   1   6 10712.7 1403.90   2
 -14   1   6 11305.9 718.069   3
 -14  -1   6 13299.3 1389.97   2
  14  -1  -6 11426.9 1311.43   1
 -14   1   5 12386.3 1459.04   2
 -14  -1   5 11555.5 1305.12   2
  14  -1  -5 10701.7 1263.48   1
 -14  -1   5 10440.9 1102.83   4
 -14   1   4 10185.9 1328.75   2
 -14  -1   4 8767.15 1113.01   2
 -14  -1   4 9331.98 1030.54   4
 -14  -1   3 153.157 132.542   4
  14   1  -3 123.272 83.8789   1
 -14  -1   3 187.079 147.613   2
 -14  -1   2 2071.07 478.007   4
 -14  -1   2 2221.36 549.968   2
  14   1  -2 1830.01 385.568   1
 -14   1   2 1828.96 531.620   2
  14   1  -1 187.761 149.014   1
 -14  -1   1 398.198 313.257   2
 -14   1   1 1037.46 479.408   2
 -14  -1   1 310.879 217.549   4
 -14  -1   0 6485.47 996.733   2
 -14   1   0 8134.75 1137.55   2
 -14  -1  -1 1916.26 591.964   2
 -14   1  -1 1579.93 479.569   2
 -14  -1  -2 966.457 446.725   2
 -14   1  -2 120.105 178.696   2
 -14  -1  -3 4003.12 834.675   2
 -14   1  -3 4442.75 859.396   2
 -14  -1  -4 138.552 81.4447   2
 -14   1  -4 87.2363 138.991   2
 -14  -1  -4-65.4786 186.849   5
 -14  -1  -5 156.471 125.335   2
 -14   1  -5 569.209 311.460   2
 -14  -1  -5 279.054 174.620   5
 -14   1  -5 3.32841 205.514   5
 -14  -1  -6 3405.48 794.034   2
 -14   1  -6 3144.35 773.278   2
 -14  -1  -6 3184.01 694.360   5
 -14   1  -6 3329.95 831.358   5
 -14  -1  -7 17350.7 1635.92   5
 -14   1  -7 18267.1 1968.74   5
 -14  -1  -7 20234.3 2092.51   2
 -14   1  -7 20628.7 1986.05   2
 -14   1  -8 4670.93 980.311   2
 -14  -1  -8 4759.89 855.326   5
 -14   1  -8 3755.68 935.848   5
 -14  -1  -8 5718.12 1170.60   2
 -14   1  -9 53.1033 134.450   2
 -14  -1  -9 74.7785 56.2065   5
 -14   1 -10 623.465 361.427   2
 -14  -1 -10 512.719 279.978   5
 -14   1 -10 142.391 172.268   5
 -14  -1 -10 123.324 231.600   2
 -14   1 -11 550.385 379.110   2
 -14  -1 -11 181.381 124.718   5
 -14   1 -11-73.7287 234.727   5
 -14  -1 -11-305.122 479.771   2
 -14  -1 -12 131.478 119.851   5
 -14   1 -12-11.1759 154.242   5
 -14   1 -12 385.486 299.402   2
 -14  -1 -13 930.737 430.238   5
 -14   1 -13 90.2611 337.712   5
 -14   1 -13 415.586 217.688   2
 -14   1 -14 142.643 211.810   5
 -14   1 -14 382.566 258.887   2
 -14   1 -15-178.257 233.123   2
 -14   1 -15 54.9837 68.9002   5
 -14   1 -16 1584.23 642.511   5
 -14   1 -17 1098.21 614.653   5
 -14   1 -18-0.67120 160.131   5
 -14   1 -19-340.727 339.631   5
  14   2 -26-803.381 525.608   5
 -14  -2  26 522.828 247.924   3
  14   2 -25 313.260 343.729   5
 -14  -2  25 4.85783 196.224   3
  14   2 -24-145.376 231.833   5
 -14  -2  24 227.923 390.060   3
  14   2 -23-101.303 219.453   5
 -14  -2  23 383.646 372.389   3
  14   2 -22 489.159 386.745   5
 -14  -2  22 618.870 516.741   3
  14   2 -21 16.9750 235.811   5
 -14  -2  21 380.974 421.450   3
  14   2 -20 1935.83 687.982   5
 -14  -2  20 1301.52 597.577   3
  14   2 -19 1833.45 695.059   5
 -14  -2  19 2157.83 749.653   3
  14   2 -18 4517.88 1034.50   5
 -14  -2  18 4221.37 1066.46   3
 -14  -2  17-470.316 399.119   3
  14   2 -17-185.809 360.362   5
 -14  -2  17-120.751 201.791   2
 -14  -2  16 1253.00 548.490   3
  14   2 -16 666.581 276.777   5
 -14  -2  16 1131.49 430.756   2
 -14  -2  15-70.4088 193.017   2
 -14  -2  15-362.404 402.832   3
  14   2 -15-32.8254 200.589   5
  14  -2 -15 269.890 282.660   1
 -14  -2  14 136.877 111.799   2
  14   2 -14-76.4619 76.3728   5
  14  -2 -14-110.137 230.528   1
 -14  -2  13 298.410 284.229   2
  14  -2 -13 257.100 260.216   1
  14  -2 -12 2803.67 748.060   1
 -14  -2  12 3076.99 656.565   2
  14  -2 -11 9161.26 1357.24   1
 -14  -2  11 8224.54 1051.13   2
  14  -2 -10 2235.20 644.515   1
 -14  -2  10 1096.03 379.745   2
  14  -2  -9-109.995 143.243   1
 -14  -2   9 21.2974 149.114   2
  14  -2  -8 834.740 403.069   1
 -14  -2   8 612.807 255.749   2
 -14  -2   7-333.611 223.778   4
  14  -2  -7-44.9148 106.385   1
 -14   2   6 16233.9 1836.42   2
 -14  -2   6 14499.7 1356.96   2
  14  -2  -6 16351.2 1729.84   1
 -14  -2   6 16437.7 1606.80   4
 -14  -2   5 1250.82 427.824   4
 -14   2   5 2749.32 798.588   2
 -14  -2   5 2113.12 517.019   2
  14  -2  -5 2528.89 686.594   1
 -14  -2   4 346.934 140.839   4
 -14   2   4 1029.54 417.844   2
 -14  -2   4 339.348 213.163   2
  14  -2  -4 346.287 294.550   1
 -14  -2   3 242.493 273.458   4
 -14   2   3 123.075 205.306   2
 -14  -2   3 130.773 183.171   2
 -14   2   2 708.636 419.241   2
 -14  -2   2 409.408 262.165   4
 -14  -2   2 745.855 358.558   2
  14   2  -2 559.354 176.838   1
 -14  -2   1 4021.67 780.680   4
 -14  -2   1 3264.14 711.991   2
  14   2  -1 3712.54 405.987   1
 -14   2   1 3772.51 838.515   2
 -14  -2   0 27145.9 2113.63   2
 -14   2   0 34614.2 2456.87   2
 -14  -2   0 33138.0 2268.96   4
 -14  -2  -1 689.663 347.119   2
 -14   2  -1 666.289 476.613   2
 -14  -2  -2 727.319 453.053   2
 -14   2  -2 794.705 436.615   2
 -14  -2  -3 10601.5 1039.04   5
 -14  -2  -3 13020.3 1609.42   2
 -14   2  -3 13686.5 1534.88   2
 -14  -2  -4 3050.29 804.573   2
 -14   2  -4 3002.85 723.939   2
 -14  -2  -4 1677.89 419.924   5
 -14   2  -5 1441.89 530.168   2
 -14  -2  -5 2583.76 517.051   5
 -14   2  -5 1716.02 634.839   5
 -14  -2  -5 1965.27 653.896   2
 -14   2  -6 7004.31 1154.40   2
 -14   2  -6 6942.79 1316.68   5
 -14  -2  -6 7315.21 1317.24   2
 -14   2  -7 55.7347 245.375   5
 -14  -2  -7 8.16647 241.389   2
 -14   2  -8 371.900 267.567   2
 -14   2  -8-126.731 269.688   5
 -14  -2  -8 281.939 288.318   2
 -14   2  -9 406.303 284.173   2
 -14  -2  -9 268.340 217.604   2
 -14   2  -9 32.0195 173.814   5
 -14   2 -10 992.233 460.065   2
 -14   2 -10 968.507 473.825   5
 -14   2 -11 697.725 384.297   2
 -14   2 -11 1560.36 667.927   5
 -14   2 -12 268.615 336.837   5
 -14   2 -12-60.5891 186.400   2
 -14   2 -13 4047.05 1068.56   5
 -14   2 -13 3047.68 875.351   2
 -14   2 -14 1442.34 686.293   5
 -14   2 -14 565.736 405.582   2
 -14   2 -15 479.034 393.888   5
 -14   2 -15 165.083 201.634   2
 -14   2 -16-244.880 356.720   2
 -14   2 -16 456.258 346.963   5
 -14   2 -17 594.527 516.771   5
  14   3 -25-250.829 274.508   5
  14  -3 -25-363.142 352.805   1
 -14  -3  24-806.753 730.018   3
  14   3 -24 974.764 611.788   5
  14  -3 -24 573.484 431.805   1
 -14  -3  23 2062.66 819.120   3
  14   3 -23 2019.90 787.490   5
  14  -3 -23 2255.86 785.441   1
  14  -3 -22 75.2499 169.622   1
 -14  -3  22 621.921 262.557   3
  14  -3 -21 99.4955 294.996   1
 -14  -3  21 547.886 414.931   3
  14   3 -21 65.9883 209.938   5
  14  -3 -20-16.9955 198.068   1
  14   3 -20-250.847 324.554   5
  14  -3 -19-88.4259 204.593   1
  14   3 -19 49.8291 274.914   5
  14  -3 -18 172.450 289.649   1
  14   3 -18 254.755 267.493   5
  14  -3 -17 40.5760 240.198   1
  14   3 -17 42.1887 102.553   5
  14  -3 -16 822.613 418.485   1
  14   3 -16 561.633 325.874   5
  14   3 -15 514.905 344.755   5
  14  -3 -15 244.481 291.400   1
  14   3 -14 1386.31 512.122   5
  14  -3 -14 1037.30 487.330   1
  14   3 -13 261.218 264.117   5
  14  -3 -13 373.344 302.983   1
  14  -3 -12-53.1805 99.7172   1
  14  -3 -11 1115.84 521.147   1
 -14  -3  11 595.606 258.051   2
 -14  -3  10 412.196 202.433   2
  14  -3 -10 335.554 226.118   1
 -14  -3   9 1721.78 565.351   4
 -14  -3   9 1903.73 454.753   2
  14  -3  -9 2090.86 719.126   1
 -14  -3   8 438.966 303.374   4
 -14  -3   8 507.802 253.629   2
  14  -3  -8 383.927 325.089   1
  14  -3  -7 8210.96 1365.64   1
 -14  -3   7 7565.62 1240.19   4
 -14  -3   7 6969.11 918.143   2
 -14  -3   6 1724.75 564.411   4
 -14  -3   6 998.742 358.693   2
 -14   3   6 157.788 435.487   2
 -14  -3   5 2245.37 678.950   4
 -14  -3   5 2398.17 575.690   2
 -14   3   5 2979.08 771.431   2
 -14  -3   4-9.23419 105.193   4
 -14  -3   4 23.7563 68.9380   2
 -14   3   4-301.251 478.103   2
 -14  -3   3 32.1730 81.8046   2
 -14  -3   3 292.263 328.451   4
 -14   3   3 299.393 350.381   2
 -14   3   2 15544.1 1792.64   2
 -14  -3   2 13358.4 1513.10   2
 -14  -3   2 12391.6 1540.06   4
 -14  -3   1 60092.8 3250.39   2
 -14  -3   1 70651.6 3686.34   4
 -14   3   1 69013.2 3744.49   2
 -14  -3   0 22346.2 2056.75   2
 -14   3   0 27365.7 2326.63   2
 -14  -3   0 23463.7 2166.46   4
 -14  -3  -1 45326.3 3038.74   2
 -14   3  -1 48185.9 3034.73   2
 -14   3  -2 3444.69 815.780   2
 -14  -3  -2 3356.60 868.170   2
 -14  -3  -3 9000.54 1424.66   2
 -14   3  -3 8433.25 1252.03   2
 -14   3  -4 206.445 208.440   2
 -14  -3  -4 6.41228 201.197   2
 -14   3  -4 178.983 297.962   5
 -14   3  -5 412.278 220.133   2
 -14  -3  -5 331.082 246.066   2
 -14   3  -5 52.6450 299.338   5
 -14   3  -6-320.699 324.713   2
 -14   3  -6-324.875 321.100   5
 -14   3  -7 5776.21 1051.94   2
 -14   3  -7 5392.83 1178.32   5
 -14   3  -8 2269.55 670.555   2
 -14   3  -8 1677.94 603.364   5
 -14   3  -9-33.2838 60.8887   2
 -14   3  -9-131.071 273.926   5
 -14   3 -10 228.165 210.616   2
 -14   3 -10 672.416 504.393   5
 -14   3 -11 231.238 223.688   2
 -14   3 -11-44.9422 148.205   5
 -14   3 -12 361.027 286.619   2
 -14   3 -12 95.5634 126.745   5
 -14   3 -13 1075.79 652.203   5
 -14   3 -14 908.998 560.947   5
 -14   3 -15-465.268 414.987   5
  14   4 -23 21.0881 157.766   5
  14   4 -22 352.531 379.783   5
  14  -4 -22-94.5437 303.937   1
  14   4 -21 930.130 535.106   5
  14  -4 -21 969.975 552.692   1
  14   4 -20 350.917 338.798   5
  14  -4 -20 369.804 333.598   1
  14   4 -19 736.071 463.451   5
  14  -4 -19 792.010 568.112   1
  14  -4 -18 134.460 168.964   1
  14   4 -18-125.149 167.113   5
  14  -4 -17 1033.24 577.242   1
  14   4 -17 824.010 431.915   5
  14  -4 -16 823.841 564.879   1
  14   4 -16 570.370 346.579   5
  14   4 -15-153.196 192.663   5
  14  -4 -15 299.984 354.098   1
  14   4 -14-225.858 251.301   5
  14  -4 -14-229.733 329.377   1
  14  -4 -13 279.682 170.885   1
  14   4 -13 155.613 127.290   5
 -14  -4  12 1933.97 775.288   4
  14  -4 -12 1559.34 662.030   1
  14   4 -12 854.376 384.368   5
 -14  -4  11 87.6998 293.086   4
  14  -4 -11 586.422 371.109   1
 -14  -4  10-78.2328 168.416   4
  14  -4 -10 1249.74 570.028   1
 -14  -4   9 2719.52 895.104   4
 -14  -4   8 244.838 323.137   4
 -14  -4   7 994.998 455.044   4
 -14  -4   6 1002.12 524.093   4
 -14   4   6 1760.91 697.593   2
 -14  -4   5 1263.83 534.406   4
 -14   4   5 591.288 365.155   2
 -14  -4   4 2965.53 855.520   4
 -14   4   4 1932.21 647.629   2
 -14  -4   4 2590.19 673.049   2
 -14  -4   3-40.4848 87.5965   4
 -14   4   3 183.216 255.077   2
 -14  -4   3-12.8688 161.772   2
 -14   4   2 1698.37 661.730   2
 -14  -4   2 1622.51 553.816   2
 -14  -4   1 698.648 610.777   4
 -14   4   1 337.775 344.259   2
 -14   4   0 1175.79 518.209   2
 -14  -4   0 1763.65 668.552   4
 -14   4  -1 3011.50 795.167   2
 -14   4  -2 2776.77 770.939   2
 -14   4  -2 2491.85 882.731   5
 -14   4  -3 1310.08 556.794   2
 -14   4  -3 920.985 463.894   5
 -14   4  -4 2114.56 635.131   2
 -14   4  -4 2378.08 890.428   5
 -14   4  -5 3673.44 847.656   2
 -14   4  -5 4546.00 1196.55   5
 -14   4  -6 23.9510 163.640   2
 -14   4  -6 472.135 428.169   5
 -14   4  -7-67.8108 331.605   5
 -14   4  -8-41.3021 245.209   5
 -14   4  -9-148.833 277.101   5
 -14   4 -10-9.57514 162.996   5
 -14   4 -11-132.401 277.615   5
 -14   4 -12-103.350 262.628   5
  14  -5 -18 135.154 207.271   1
  14  -5 -17 523.647 464.367   1
 -14  -5  16 393.415 400.856   4
  14  -5 -16 445.382 400.112   1
  14  -5 -15 449.339 411.667   1
 -14  -5  15-280.608 371.308   4
 -14  -5  14 210.941 272.436   4
 -14  -5  13 3853.44 1205.33   4
 -14  -5  12 2786.95 1028.77   4
 -14  -5  11-285.479 306.724   4
 -14  -5  10-137.786 284.309   4
 -14  -5   9 2182.63 819.207   4
 -14  -5   8 2042.94 804.356   4
 -14  -5   7 332.077 389.645   4
 -14  -5   6 126.692 327.998   4
 -14   5   6-207.413 364.384   2
 -14  -5   5 2852.85 871.992   4
 -14   5   5 3094.11 1035.02   2
 -14  -5   4-91.9647 187.981   4
 -14   5   4 121.051 168.083   2
 -14  -5   3 1623.05 651.559   4
 -14   5   3 1579.23 633.381   2
 -14  -5   2 47.3517 114.379   4
 -14   5   2 340.884 416.642   2
 -14   5   1 587.891 502.528   2
 -14  -5   1-853.803 496.733   4
 -14   5   0-39.5269 264.786   5
 -14   5  -1 88.2313 167.590   5
 -14   5  -2 364.181 197.960   5
 -14   5  -3 167.723 242.902   5
 -14   5  -4 658.101 479.385   5
 -14   5  -5 34.2738 218.031   5
 -14   5  -6 732.101 480.074   5
 -14   5  -7 1166.08 650.982   5
 -14   5  -8-280.101 388.759   5
 -14  -6   7 1022.14 613.293   4
 -14  -6   6-258.831 206.868   4
 -14  -6   5 525.647 629.597   4
 -14  -6   4-260.697 312.936   4
 -14  -6   3 248.150 169.926   4
 -14   6   3 1169.03 646.037   5
 -14   6   2 857.029 605.247   5
 -14  -6   2 422.035 499.161   4
 -14   6   1 657.463 486.780   5
 -14   6   0-473.610 451.475   5
 -14   6  -1 461.395 474.685   5
 -14   6  -2 137.374 366.298   5
 -14   6  -3 126.844 131.326   5
 -15   0  27 1723.99 845.533   3
 -15   0  26-58.8666 320.722   3
 -15   0  25-415.311 403.726   3
 -15   0  24-91.3643 234.471   3
 -15   0  23 334.805 445.845   3
 -15   0  22 194.278 417.843   3
 -15   0  21 1530.68 727.290   3
 -15   0  20-232.464 355.492   3
 -15   0  19 26067.9 2531.54   3
 -15   0  18 353.015 441.063   3
 -15   0  17 197.872 366.618   3
 -15   0  16 196.600 246.552   3
 -15   0  15 28128.9 2271.00   3
 -15   0  14-76.4589 139.171   3
 -15   0  13 2032.21 579.213   3
 -15   0  12-319.171 269.154   3
 -15   0  11 70.5706 204.823   3
 -15   0  11 230.605 193.712   2
 -15   0  10-17.3078 94.8485   3
 -15   0  10 158.617 125.754   2
 -15   0   9 16228.4 1786.07   2
 -15   0   9 15603.2 1328.76   3
 -15   0   8 4.93303 95.1527   2
 -15   0   7 11683.6 1458.58   2
 -15   0   6 288.501 290.194   2
 -15   0   5 14244.5 1571.36   2
 -15   0   5 11828.9 972.329   4
 -15   0   4-21.5708 57.9675   4
 -15   0   4 713.769 458.691   2
 -15   0   3 21885.6 1903.65   2
 -15   0   3 20240.6 1137.57   4
  15   0  -2-24.6331 41.1117   3
  15   0  -2 27.9454 136.339   1
 -15   0   1 12223.4 1413.49   2
 -15   0   0 1322.80 523.188   2
 -15   0  -1 5.91393 162.251   2
 -15   0  -2-277.154 184.278   2
 -15   0  -3 14490.9 1599.46   2
 -15   0  -4 598.775 387.020   2
 -15   0  -5 28570.1 2269.88   5
 -15   0  -5 30971.3 2430.86   2
 -15   0  -6 111.334 219.442   2
 -15   0  -6 15.8658 221.563   5
 -15   0  -7 7679.37 1209.23   5
 -15   0  -7 8908.71 1365.03   2
 -15   0  -8 157.522 223.119   2
 -15   0  -8 125.718 206.527   5
 -15   0  -9 7643.82 1347.88   2
 -15   0  -9 6073.57 1103.73   5
 -15   0 -10-298.891 309.321   5
 -15   0 -10 293.284 348.357   2
 -15   0 -11 2546.89 748.424   5
 -15   0 -11 2273.39 786.294   2
 -15   0 -12 33.2840 188.628   5
 -15   0 -12-218.452 362.521   2
 -15   0 -13 3249.49 865.937   5
 -15   0 -13 4276.16 1121.91   2
 -15   0 -14-14.9893 220.633   2
 -15   0 -14-252.954 296.635   5
 -15   0 -15 1348.68 580.570   5
 -15   0 -16 173.034 222.592   5
 -15   0 -17 1465.65 664.028   5
 -15  -1  27 3164.59 1234.42   3
 -15   1  27 3646.87 1568.23   3
  15   1 -26 3113.51 1044.37   5
 -15  -1  26 2408.44 1029.25   3
 -15   1  26 4103.31 1491.35   3
  15   1 -25 861.889 564.633   5
 -15  -1  25 713.406 637.970   3
 -15   1  25 994.343 751.361   3
  15   1 -24 80.7672 209.298   5
 -15  -1  24 536.978 377.944   3
 -15  -1  23 1796.68 784.736   3
  15   1 -23 1588.15 691.207   5
 -15   1  23 3617.13 1182.68   3
  15   1 -22 4611.12 1151.04   5
 -15  -1  22 5073.14 1268.64   3
 -15   1  22 5038.68 1340.79   3
  15   1 -21-169.025 289.343   5
 -15  -1  21 614.241 298.171   3
 -15  -1  20 1334.66 533.372   3
 -15  -1  19-329.085 406.601   3
 -15  -1  18 2463.26 745.649   3
 -15   1  18 4268.73 983.549   3
 -15  -1  17 2169.52 630.521   3
 -15   1  17 2501.92 741.706   3
 -15  -1  16 2027.64 590.526   3
 -15   1  16 2076.17 561.294   3
 -15  -1  15 5592.00 1093.19   3
 -15   1  15 6624.31 1072.84   3
 -15  -1  15 4765.43 1012.60   2
 -15   1  14 7584.93 1091.49   3
 -15  -1  14 6632.43 1137.26   3
 -15  -1  14 6868.07 1169.03   2
 -15  -1  13 1149.26 310.165   3
 -15  -1  13 1608.05 550.974   2
 -15   1  13 2013.10 544.168   3
 -15  -1  12 2126.47 568.458   3
 -15  -1  12 3318.17 748.297   2
 -15   1  12 2096.41 548.024   3
 -15  -1  11 50.8375 81.8506   2
 -15   1  11 286.149 254.048   3
 -15  -1  10 980.506 387.360   2
 -15   1  10 481.328 246.605   3
  15  -1 -10 662.441 352.113   1
  15  -1  -9-134.920 211.722   1
 -15   1   9 148.542 117.446   3
 -15   1   9 356.056 310.837   2
  15  -1  -8 2205.30 586.829   1
 -15   1   8 1906.33 366.186   3
 -15   1   8 1800.09 528.531   2
 -15  -1   8 3251.19 757.459   2
 -15   1   7 5671.66 572.096   3
 -15   1   7 6221.19 1083.10   2
  15  -1  -7 6452.24 1010.90   1
 -15  -1   7 6727.33 1026.31   2
 -15  -1   6 8219.74 1016.67   4
 -15   1   6 11039.7 1470.46   2
 -15  -1   6 9521.71 1219.28   2
  15  -1  -6 8194.35 1148.26   1
 -15   1   5 1685.89 579.415   2
 -15  -1   5 1518.14 433.891   4
  15  -1  -5 1448.44 492.295   1
 -15  -1   5 1374.47 482.223   2
 -15   1   4 423.523 213.426   2
  15  -1  -4 782.005 321.357   1
  15   1  -4 315.636 164.140   1
 -15  -1   4 350.407 165.546   4
 -15  -1   4 272.032 235.238   2
  15  -1  -3 6087.02 990.899   1
 -15  -1   3 5934.42 928.223   2
  15   1  -3 5306.30 713.545   1
 -15   1   3 5722.89 997.097   2
 -15  -1   3 5115.81 776.277   4
 -15  -1   2 1391.26 394.155   4
  15   1  -2 2051.03 435.240   1
 -15  -1   2 1359.30 455.903   2
 -15   1   2 1482.51 555.834   2
 -15  -1   1 2350.91 619.016   2
 -15   1   1 3606.64 865.031   2
 -15  -1   0 992.165 341.755   2
 -15   1   0 897.158 407.016   2
 -15  -1  -1 3339.45 763.861   2
 -15   1  -1 2392.20 642.731   2
 -15  -1  -2 3066.34 731.867   2
 -15   1  -2 2776.45 684.354   2
 -15  -1  -3 924.892 409.866   2
 -15   1  -3 1566.65 544.523   2
 -15  -1  -4 1162.16 450.691   2
 -15   1  -4 679.179 278.215   2
 -15  -1  -4 762.238 300.268   5
 -15  -1  -5 4797.72 1005.07   2
 -15  -1  -5 5650.75 906.964   5
 -15   1  -5 7048.44 1155.07   2
 -15   1  -5 5081.60 1026.72   5
 -15  -1  -6-119.821 235.665   2
 -15   1  -6 26.1862 124.653   2
 -15  -1  -6 3.59729 118.896   5
 -15   1  -6-303.883 446.781   5
 -15  -1  -7 2041.06 709.038   2
 -15   1  -7 2560.50 726.088   2
 -15  -1  -7 1452.75 478.389   5
 -15   1  -7 1678.55 625.290   5
 -15   1  -8 28.3017 168.862   2
 -15  -1  -8-42.7019 197.103   5
 -15   1  -8-108.654 233.049   5
 -15  -1  -8-183.876 261.974   2
 -15   1  -9-85.1233 199.605   2
 -15  -1  -9 127.842 147.299   5
 -15   1  -9 80.5003 175.601   5
 -15  -1  -9-1.06771 293.832   2
 -15   1 -10 2266.96 722.394   2
 -15  -1 -10 2068.90 612.928   5
 -15   1 -10 1929.59 655.465   5
 -15  -1 -10 2999.67 907.273   2
 -15   1 -11-70.0006 280.199   2
 -15  -1 -11-556.048 327.407   5
 -15   1 -11-245.952 315.246   5
 -15  -1 -11 10.1436 253.196   2
 -15  -1 -12 306.097 501.434   2
 -15   1 -12 218.541 215.604   5
 -15   1 -12-135.844 92.6772   2
 -15   1 -13 121.518 116.261   5
 -15   1 -13-133.482 168.728   2
 -15   1 -14 217.706 293.149   5
 -15   1 -14-53.1978 179.427   2
 -15   1 -15 107.998 160.154   2
 -15   1 -15 135.438 213.927   5
 -15   1 -16 1925.23 720.824   5
 -15   1 -17 2248.85 836.887   5
 -15   1 -18 28.3233 99.7333   5
 -15   1 -19-227.181 341.193   5
 -15  -2  26 1051.74 697.558   3
  15   2 -25-11.4584 183.584   5
 -15  -2  25 135.039 196.561   3
  15   2 -24-276.680 396.828   5
 -15  -2  24 313.430 446.277   3
  15   2 -23 664.632 496.675   5
 -15  -2  23 163.476 300.991   3
  15   2 -22-113.821 92.7872   5
 -15  -2  22-10.2535 211.268   3
  15   2 -21 669.932 435.133   5
 -15  -2  21-193.574 411.219   3
  15   2 -20-370.378 338.743   5
 -15  -2  20-3.08811 203.613   3
  15   2 -19 389.233 399.438   5
 -15  -2  19 213.825 172.336   3
  15   2 -18 36.8983 120.761   5
 -15  -2  18-287.483 510.571   3
  15   2 -17-162.468 370.182   5
 -15  -2  17 102.292 99.2051   2
 -15  -2  17-249.036 293.454   3
 -15  -2  16 263.840 164.755   2
 -15  -2  16-155.253 359.690   3
  15  -2 -16-207.472 284.242   1
 -15  -2  15 1304.07 461.062   2
  15  -2 -15 2407.18 759.125   1
 -15  -2  14 878.589 351.759   2
  15  -2 -14 1216.21 497.010   1
 -15  -2  13 714.955 356.544   2
  15  -2 -13 1103.55 445.352   1
  15  -2 -12 217.439 252.329   1
 -15  -2  12 204.727 122.622   2
  15  -2 -11 456.172 319.755   1
 -15  -2  11 490.243 284.318   2
  15  -2 -10 793.482 430.586   1
 -15  -2  10 574.399 273.338   2
 -15  -2   9 3338.45 688.198   2
  15  -2  -9 2402.23 666.474   1
  15  -2  -8 1816.10 630.012   1
 -15  -2   8 1549.71 465.363   2
 -15   2   8 823.378 381.704   2
 -15  -2   7 8110.34 1167.20   4
 -15   2   7 11111.3 1584.31   2
 -15   2   7 8886.10 686.991   3
 -15  -2   7 9221.72 1127.78   2
  15  -2  -7 9555.51 1374.60   1
 -15  -2   6-111.432 163.826   4
  15  -2  -6 156.279 282.522   1
 -15   2   6-2.67034 212.504   2
 -15  -2   6-80.5571 126.788   2
 -15  -2   5 187.953 99.4471   4
 -15   2   5 371.376 290.541   2
 -15  -2   5 286.896 226.472   2
  15  -2  -5 336.678 305.103   1
 -15  -2   4 4581.06 848.198   4
 -15   2   4 4559.00 942.258   2
 -15  -2   4 3849.21 760.185   2
 -15   2   3 18496.3 1910.30   2
 -15  -2   3 19137.1 1705.18   2
 -15  -2   3 19587.0 1741.31   4
 -15  -2   2 41447.2 2563.63   2
  15   2  -2 41010.2 1583.82   1
 -15  -2   2 44313.3 2630.42   4
 -15   2   2 43988.3 2916.05   2
 -15  -2   1 7781.74 1127.05   2
 -15   2   1 8686.42 1299.86   2
 -15  -2   1 7896.52 1130.00   4
 -15  -2   0 3418.37 784.677   2
 -15   2   0 3027.35 753.410   2
 -15  -2  -1 1134.38 435.129   2
 -15   2  -1 1388.99 536.875   2
 -15  -2  -2 46780.5 2999.01   2
 -15   2  -2 44352.9 2849.90   2
 -15  -2  -3 11261.1 1134.82   5
 -15  -2  -3 12813.2 1635.37   2
 -15   2  -3 12794.5 1505.32   2
 -15  -2  -4 537.801 333.171   2
 -15   2  -4-225.736 284.275   2
 -15   2  -5 11057.6 1685.02   5
 -15  -2  -5 9659.26 1498.89   2
 -15   2  -5 11642.2 1501.13   2
 -15   2  -6 778.582 398.834   2
 -15  -2  -6 596.201 324.098   2
 -15   2  -7 933.556 390.933   2
 -15   2  -7 1621.58 613.312   5
 -15  -2  -7 1460.37 632.876   2
 -15   2  -8 838.835 395.497   2
 -15   2  -8 1595.37 642.221   5
 -15  -2  -8 672.193 396.204   2
 -15   2  -9 27.3652 116.978   2
 -15   2  -9-178.475 271.550   5
 -15   2 -10-94.5551 239.857   2
 -15  -2 -10 109.869 242.660   2
 -15   2 -11 1313.88 563.147   2
 -15   2 -11 1825.18 714.759   5
 -15   2 -12 310.626 271.200   2
 -15   2 -12 79.0414 218.236   5
 -15   2 -13-90.1689 179.928   5
 -15   2 -13 216.197 250.434   2
 -15   2 -14 9.39833 177.323   5
 -15   2 -14 167.881 245.993   2
 -15   2 -15 853.980 549.484   5
 -15   2 -15-56.6114 260.281   2
 -15   2 -16-146.013 222.775   2
 -15   2 -16 262.287 317.864   5
  15  -3 -24 681.374 485.562   1
 -15  -3  24-93.1160 380.909   3
  15   3 -24 91.8468 173.679   5
  15  -3 -23 211.656 269.919   1
 -15  -3  23-429.572 566.301   3
  15   3 -23 29.2821 244.538   5
  15  -3 -22 679.352 505.544   1
  15   3 -22 390.295 389.797   5
  15  -3 -21 493.302 473.180   1
  15   3 -21-806.730 489.608   5
  15  -3 -20 925.989 592.419   1
  15   3 -20 309.429 297.043   5
  15  -3 -19 1395.78 654.892   1
  15   3 -19 2051.32 734.014   5
  15  -3 -18 1188.46 609.567   1
  15   3 -18 817.298 464.275   5
  15  -3 -17 779.017 492.762   1
  15   3 -17 127.979 104.069   5
  15   3 -16-133.178 185.900   5
  15  -3 -16 33.6134 221.115   1
  15   3 -15 114.117 219.198   5
  15  -3 -15 153.144 109.465   1
  15  -3 -14 16.3821 203.313   1
  15  -3 -13 1532.44 617.093   1
  15  -3 -12 4279.92 1042.57   1
  15  -3 -11 14.8184 205.098   1
 -15  -3  11 6.34839 126.660   2
 -15  -3  10 9272.93 1059.70   2
  15  -3 -10 10872.3 1617.16   1
  15  -3  -9 72.3484 153.006   1
 -15  -3   9 205.148 261.206   4
 -15  -3   9 123.448 87.1618   2
 -15  -3   8-240.839 275.347   4
 -15  -3   8 261.176 191.352   2
  15  -3  -8 164.996 95.5185   1
 -15  -3   7-119.048 251.456   4
 -15  -3   7-13.9191 149.322   2
 -15   3   7-677.076 596.674   2
  15  -3  -7-77.6666 343.027   1
 -15  -3   6 2115.59 689.251   4
 -15  -3   6 1016.64 385.780   2
 -15   3   6 1301.39 563.456   2
 -15  -3   5 5605.90 1062.59   4
 -15   3   5 6786.55 1235.05   2
 -15  -3   5 5240.29 874.833   2
 -15  -3   4 1250.08 518.597   4
 -15  -3   4 670.459 312.222   2
 -15   3   4 1332.53 546.682   2
 -15  -3   3 6821.25 1126.33   4
 -15  -3   3 6141.17 1024.66   2
 -15   3   2 23887.8 2304.88   2
 -15  -3   2 19595.4 1854.39   2
 -15  -3   2 20860.3 2035.00   4
 -15  -3   1 1747.61 630.930   4
 -15  -3   1 665.189 420.903   2
 -15   3   1 991.142 601.277   2
 -15   3   0 5685.51 1165.83   2
 -15  -3   0 3300.65 834.583   2
 -15   3  -1 4690.18 1003.39   2
 -15  -3  -1 5364.80 1063.27   2
 -15   3  -2 1232.52 535.429   2
 -15  -3  -2 674.736 352.609   2
 -15   3  -3 5200.02 1064.09   2
 -15  -3  -3 3105.73 867.678   2
 -15   3  -4 1724.02 564.112   2
 -15  -3  -4 1438.86 488.416   2
 -15   3  -4 1084.98 579.383   5
 -15   3  -5-472.983 372.821   2
 -15  -3  -5-54.4233 139.058   2
 -15   3  -5-509.696 488.991   5
 -15   3  -6 532.235 322.882   2
 -15  -3  -6 36.8776 158.959   2
 -15   3  -6 209.426 273.199   5
 -15   3  -7 287.251 343.519   2
 -15   3  -7 254.547 160.545   5
 -15   3  -8 110.200 214.625   2
 -15   3  -8 253.013 299.277   5
 -15   3  -9 386.582 283.204   2
 -15   3  -9-163.731 296.374   5
 -15   3 -10 1149.15 505.188   2
 -15   3 -10 623.689 408.541   5
 -15   3 -11 624.596 360.652   2
 -15   3 -11 278.317 215.095   5
 -15   3 -12 90.2941 119.103   2
 -15   3 -12-107.252 268.270   5
 -15   3 -13-194.760 308.266   5
 -15   3 -14 707.010 481.666   5
  15   4 -23-446.363 391.156   5
  15   4 -22 530.282 413.710   5
  15  -4 -22 132.017 156.267   1
  15   4 -21 108.719 219.084   5
  15  -4 -21-49.2127 125.168   1
  15   4 -20 63.5160 103.512   5
  15  -4 -20-327.350 428.949   1
  15   4 -19 407.289 348.339   5
  15  -4 -19 206.211 322.755   1
  15  -4 -18-258.390 279.553   1
  15   4 -18 75.6904 202.533   5
  15  -4 -17 161.121 245.708   1
  15   4 -17 190.411 346.610   5
  15   4 -16 330.488 318.124   5
  15  -4 -16 434.665 352.647   1
  15   4 -15 440.073 277.638   5
  15  -4 -15 222.524 337.498   1
  15   4 -14 260.442 221.368   5
  15  -4 -14 282.482 143.188   1
  15  -4 -13-265.884 389.271   1
 -15  -4  12 168.146 317.053   4
  15  -4 -12 257.445 306.024   1
 -15  -4  11-123.349 250.957   4
  15  -4 -11-23.6194 170.122   1
 -15  -4  10 1940.97 783.847   4
  15  -4 -10 904.988 483.038   1
 -15  -4   9 1082.21 580.510   4
 -15  -4   8 504.551 421.625   4
 -15  -4   7-33.1743 203.267   4
 -15   4   7-274.069 585.425   2
 -15  -4   6 783.949 436.020   4
 -15   4   6 1476.99 599.823   2
 -15  -4   5-9.34873 135.498   4
 -15   4   5 479.929 288.399   2
 -15  -4   4 353.018 257.099   4
 -15   4   4 229.464 328.900   2
 -15  -4   4 96.7135 106.808   2
 -15  -4   3 281.286 273.437   4
 -15   4   3 387.548 336.352   2
 -15  -4   3 670.059 367.404   2
 -15  -4   2 179.671 212.989   4
 -15   4   2 690.194 462.134   2
 -15  -4   2 685.471 321.618   2
 -15  -4   1 1138.27 553.909   4
 -15  -4   1 1211.60 512.124   2
 -15   4   1 1392.54 640.823   2
 -15   4   0 238.649 222.735   2
 -15   4  -1 320.323 369.664   2
 -15   4  -2 487.366 360.385   2
 -15   4  -2 1452.23 625.503   5
 -15   4  -3 1566.42 544.422   2
 -15   4  -3 1476.27 699.800   5
 -15   4  -4-164.437 212.514   2
 -15   4  -4 186.246 239.647   5
 -15   4  -5 268.492 310.887   2
 -15   4  -5-247.819 381.193   5
 -15   4  -6 117.090 223.686   2
 -15   4  -6 150.022 200.463   5
 -15   4  -7 57.1251 314.938   5
 -15   4  -8 107.258 196.843   5
 -15   4  -9-245.547 375.030   5
 -15   4 -10 324.587 378.410   5
 -15   4 -11-61.2526 278.502   5
  15  -5 -17-164.231 136.006   1
  15  -5 -16 666.444 485.987   1
 -15  -5  16 1382.56 794.002   4
 -15  -5  15 168.696 268.392   4
  15  -5 -15 301.401 459.037   1
 -15  -5  14 588.116 478.120   4
 -15  -5  13-170.411 261.411   4
 -15  -5  12 184.026 276.861   4
 -15  -5  11 188.101 381.592   4
 -15  -5  10 1533.33 741.539   4
 -15  -5   9 49.3079 191.448   4
 -15  -5   8-475.227 397.144   4
 -15  -5   7-3.34096 148.016   4
 -15   5   7-48.8319 239.605   2
 -15  -5   6 1063.46 578.619   4
 -15   5   6 1961.74 753.064   2
 -15  -5   5 735.544 537.657   4
 -15   5   5 504.451 474.990   2
 -15  -5   4-136.456 244.172   4
 -15   5   4 327.286 263.353   2
 -15  -5   3 54.0971 204.659   4
 -15   5   3-325.711 411.951   2
 -15  -5   2 847.929 557.132   4
 -15   5   2 1676.86 752.320   2
 -15  -5   1-313.732 400.514   4
 -15   5   1 730.533 503.196   2
 -15   5   0 169.602 198.407   5
 -15   5  -1-287.251 349.013   5
 -15   5  -2-32.1884 149.944   5
 -15   5  -3-230.626 324.370   5
 -15   5  -4 532.368 431.852   5
 -15   5  -5-52.7427 210.264   5
 -15   5  -6-116.928 259.036   5
 -15   5  -7 258.930 536.013   5
 -15   6   3 1249.43 792.675   5
 -15   6   2 1474.45 785.731   5
 -15   6   1 22.2607 137.481   5
 -15   6   0 201.905 345.342   5
 -15   6  -1 436.508 489.757   5
 -16   0  27 293.137 448.872   3
 -16   0  26-61.2358 201.182   3
 -16   0  25-99.2797 301.844   3
 -16   0  24-151.922 235.922   3
 -16   0  23 402.017 559.539   3
 -16   0  22 534.760 411.685   3
 -16   0  21 407.408 359.111   3
 -16   0  20 1937.80 743.849   3
 -16   0  19-35.7359 339.867   3
 -16   0  18 15039.9 1878.61   3
 -16   0  17 649.858 454.811   3
 -16   0  16 15479.2 1778.73   3
 -16   0  15 300.569 336.617   3
 -16   0  14 3539.37 777.788   3
 -16   0  13-39.7176 225.670   3
 -16   0  12 7068.40 1016.78   3
 -16   0  12 5642.10 1105.53   2
 -16   0  11-71.6306 68.1466   3
 -16   0  11 9.36932 246.727   2
 -16   0  10 769.762 288.327   3
 -16   0  10 1343.06 679.641   2
 -16   0   9-181.195 190.916   2
 -16   0   8 435.766 322.222   2
 -16   0   7 308.286 305.158   2
  16   0  -7 65.4895 154.172   1
 -16   0   6 53984.6 3169.79   2
 -16   0   6 47414.3 2006.55   4
 -16   0   5-83.9665 99.0846   4
 -16   0   5 544.172 442.296   2
 -16   0   4 20365.1 1900.73   2
 -16   0   4 19079.2 1162.29   4
 -16   0   3 3774.58 900.064   2
 -16   0   2 1180.77 482.133   2
 -16   0   1 160.286 146.750   2
 -16   0   0 7818.59 1193.33   2
 -16   0  -1-26.1855 278.061   2
 -16   0  -2 3140.44 728.251   2
 -16   0  -3 485.152 226.282   2
 -16   0  -4-58.6767 233.954   2
 -16   0  -5 72.0160 159.340   2
 -16   0  -5 403.273 215.099   5
 -16   0  -6 1461.22 684.120   2
 -16   0  -6-61.4929 188.932   5
 -16   0  -7-19.9178 243.548   2
 -16   0  -7-202.317 207.867   5
 -16   0  -8 441.324 317.339   2
 -16   0  -8 1447.64 544.003   5
 -16   0  -9 233.480 368.490   2
 -16   0  -9 42.6876 472.228   5
 -16   0 -10 8440.77 1383.33   5
 -16   0 -10 10051.7 1633.47   2
 -16   0 -11 311.247 229.004   5
 -16   0 -11 246.031 299.044   2
 -16   0 -12-314.312 376.598   5
 -16   0 -12 173.765 309.225   2
 -16   0 -13 94.0022 167.644   5
 -16   0 -13-123.009 108.547   2
 -16   0 -14 585.335 449.741   2
 -16   0 -14 237.843 205.388   5
 -16   0 -15-464.632 354.420   5
 -16   0 -16 775.570 467.914   5
 -16  -1  27-219.977 276.907   3
 -16   1  27 977.101 764.175   3
 -16  -1  26-46.7936 462.817   3
 -16   1  26 1119.56 913.903   3
 -16  -1  25 258.269 144.743   3
 -16   1  25 1772.43 947.015   3
 -16  -1  24-379.100 428.607   3
 -16   1  24-109.838 648.052   3
 -16  -1  23 7.81225 413.480   3
 -16   1  23-125.607 186.735   3
 -16  -1  22 2904.86 943.908   3
 -16   1  22 4183.23 1196.81   3
 -16  -1  21-127.204 401.205   3
 -16   1  21 339.247 312.392   3
 -16  -1  20 1344.08 654.883   3
 -16   1  20 394.122 236.754   3
 -16  -1  19 17.6341 184.876   3
 -16   1  19 186.150 299.304   3
 -16   1  18 9837.25 1520.21   3
 -16  -1  18 9581.91 1535.61   3
 -16  -1  17 713.620 476.744   3
 -16   1  17 942.522 475.918   3
 -16  -1  16 106.226 245.087   3
 -16  -1  16 664.465 401.762   2
 -16   1  16 605.798 204.279   3
 -16  -1  15 1500.11 573.712   3
 -16  -1  15 894.160 490.997   2
 -16   1  15 880.177 439.094   3
 -16  -1  14-201.146 150.754   3
 -16  -1  14 232.432 266.253   2
 -16   1  14 612.629 356.645   3
 -16  -1  13-163.530 279.822   3
 -16  -1  13 86.6449 88.5938   2
 -16   1  13 29.1315 92.8817   3
 -16  -1  12 30.4020 205.008   2
 -16   1  12 153.886 193.551   3
 -16  -1  11 943.957 408.683   2
 -16   1  11 802.760 282.103   3
  16  -1 -11 400.558 296.706   1
 -16  -1  10 5025.38 950.402   2
  16  -1 -10 4928.20 944.417   1
 -16   1  10 5489.22 745.528   3
 -16   1  10 5041.68 1070.33   2
 -16   1   9 9023.70 1399.07   2
 -16   1   9 8473.40 855.281   3
  16  -1  -9 8517.58 1206.17   1
 -16  -1   9 8488.16 1254.77   2
 -16   1   8-76.5164 120.040   3
 -16   1   8-30.3372 265.733   2
  16  -1  -8 37.9528 79.8202   1
 -16  -1   8 250.520 312.429   2
 -16  -1   7 116.364 180.171   4
 -16   1   7 399.703 314.865   2
  16  -1  -7-157.600 173.177   1
 -16  -1   7 52.0727 70.3377   2
 -16   1   6 8398.13 578.375   4
 -16   1   6 10871.4 1448.49   2
 -16  -1   6 11161.8 1363.80   2
  16  -1  -6 10202.2 1318.08   1
 -16  -1   6 8880.83 1040.89   4
 -16   1   5 8832.86 1313.47   2
  16   1  -5 7353.77 915.490   1
 -16  -1   5 8935.95 1222.72   2
  16  -1  -5 8524.68 1196.55   1
 -16  -1   5 6838.29 911.647   4
 -16  -1   4 3403.13 630.636   4
  16   1  -4 3399.52 606.286   1
  16  -1  -4 2854.87 721.480   1
 -16  -1   4 3770.21 797.796   2
 -16   1   4 2824.28 741.645   2
 -16  -1   3-99.4024 131.858   4
 -16  -1   3-215.516 167.237   2
  16   1  -3-35.9869 94.2646   1
 -16   1   3 2.71072 114.369   2
 -16  -1   2 3339.58 749.916   2
 -16   1   2 2811.10 757.715   2
 -16  -1   2 3041.60 609.334   4
  16   1  -2 3683.01 603.961   1
 -16  -1   1 1057.03 390.180   2
 -16   1   1 1552.24 530.350   2
 -16  -1   0-159.409 107.176   2
 -16   1   0 421.364 316.596   2
 -16  -1  -1 470.253 335.204   2
 -16   1  -1 383.476 309.972   2
 -16  -1  -2 472.168 339.234   2
 -16   1  -2 363.034 315.092   2
 -16  -1  -3 328.554 362.189   2
 -16   1  -3 68.5060 149.600   2
 -16  -1  -4 1755.52 591.876   2
 -16   1  -4 768.161 366.117   2
 -16  -1  -4 866.912 340.930   5
 -16  -1  -5 1583.32 598.038   2
 -16   1  -5 1561.52 591.534   2
 -16  -1  -5 391.889 241.840   5
 -16   1  -5 782.585 349.936   5
 -16  -1  -6 1287.53 532.978   2
 -16   1  -6 1314.95 545.951   2
 -16  -1  -6 829.323 368.371   5
 -16   1  -6 1259.67 509.131   5
 -16  -1  -7 6349.95 1259.55   2
 -16   1  -7 7366.01 1235.97   2
 -16  -1  -7 5260.31 944.496   5
 -16   1  -7 6509.91 1232.96   5
 -16   1  -8 1541.94 598.168   2
 -16  -1  -8 939.342 435.640   5
 -16   1  -8 2323.90 745.780   5
 -16  -1  -8 2619.48 810.949   2
 -16   1  -9 3010.96 858.062   2
 -16  -1  -9 1987.70 591.697   5
 -16   1  -9 3147.05 871.156   5
 -16  -1  -9 3402.50 975.184   2
 -16   1 -10-96.2956 237.616   2
 -16  -1 -10 358.609 265.260   5
 -16   1 -10-325.926 390.023   5
 -16  -1 -10-75.9823 325.270   2
 -16   1 -11 27.0309 179.662   2
 -16   1 -11 185.082 195.588   5
 -16  -1 -11 222.138 479.363   2
 -16   1 -12 595.431 476.181   5
 -16  -1 -12 323.840 290.344   2
 -16   1 -12 420.395 351.992   2
 -16  -1 -13 3155.61 1030.59   2
 -16   1 -13 3665.87 1011.74   5
 -16   1 -13 3038.46 906.012   2
 -16   1 -14-4.94613 201.829   5
 -16   1 -14 515.762 432.630   2
 -16   1 -15 2322.82 824.235   5
 -16   1 -15 1620.79 712.569   2
 -16   1 -16 781.236 457.081   5
 -16   1 -17-118.557 304.756   5
 -16   1 -18 56.0958 327.317   5
  16   2 -25 316.260 405.461   5
 -16  -2  25-278.987 480.172   3
  16   2 -24 95.0487 328.467   5
 -16  -2  24-467.980 511.256   3
  16   2 -23-157.377 263.986   5
 -16  -2  23 494.581 259.486   3
  16   2 -22 309.000 476.139   5
 -16  -2  22-199.073 315.666   3
  16   2 -21 386.233 313.656   5
 -16  -2  21 133.957 180.525   3
  16   2 -20 79.0688 97.7688   5
 -16  -2  20-369.526 509.440   3
 -16  -2  19-133.695 352.865   3
 -16  -2  18-439.373 516.785   3
 -16  -2  17 877.470 444.559   2
 -16  -2  17 368.549 272.622   3
  16  -2 -17 701.695 305.382   1
 -16  -2  16 100.487 71.1926   2
  16  -2 -16 185.926 192.398   1
 -16  -2  15 603.051 321.372   2
  16  -2 -15 219.318 240.013   1
 -16  -2  14 979.812 443.654   2
  16  -2 -14 1108.30 511.710   1
  16  -2 -13 1880.30 656.608   1
 -16  -2  13 2269.33 582.777   2
  16  -2 -12 1138.24 497.500   1
 -16  -2  12 482.326 289.295   2
  16  -2 -11 2783.71 794.431   1
 -16  -2  11 2297.96 599.811   2
 -16  -2  10-134.150 98.8686   2
  16  -2 -10 108.512 252.165   1
  16  -2  -9 413.326 343.316   1
 -16   2   9-404.345 557.979   2
 -16  -2   9 241.657 213.061   2
 -16  -2   8-1.50530 116.460   4
  16  -2  -8-9.05746 127.825   1
 -16   2   8 265.344 251.203   2
 -16  -2   8 460.013 298.773   2
 -16  -2   7 334.292 221.556   4
 -16   2   7 320.232 98.4258   2
 -16  -2   7 687.998 315.660   2
  16  -2  -7 377.048 246.623   1
 -16  -2   6 80.2692 71.8800   4
 -16   2   6 295.990 147.380   2
 -16  -2   6 62.6164 92.8962   2
  16  -2  -6 190.808 171.830   1
  16  -2  -5 14310.1 1713.18   1
 -16   2   5 12892.7 1664.27   2
 -16  -2   5 12984.4 1412.59   2
 -16  -2   5 10295.2 1291.72   4
 -16  -2   4 4827.92 870.648   4
 -16   2   4 4616.54 1034.87   2
 -16  -2   4 4171.08 820.219   2
 -16   2   3 4045.27 941.749   2
 -16  -2   3 4072.84 810.081   4
 -16  -2   3 2945.04 693.496   2
 -16  -2   2 817.579 349.178   4
 -16  -2   2 1373.06 449.704   2
 -16   2   2 541.371 458.758   2
 -16  -2   1 710.089 377.772   2
 -16   2   1 206.368 249.313   2
 -16  -2   1 876.564 387.619   4
 -16  -2   0 1022.45 457.721   2
 -16   2   0 698.971 392.068   2
 -16  -2  -1 3839.09 856.474   2
 -16   2  -1 5001.87 1010.30   2
 -16  -2  -2 2863.78 765.183   2
 -16   2  -2 2299.40 661.613   2
 -16  -2  -3 810.476 478.635   2
 -16   2  -3 310.752 231.579   2
 -16  -2  -4 3581.98 910.037   2
 -16   2  -4 1684.74 560.307   2
 -16   2  -5 1739.70 534.391   2
 -16   2  -5 2803.31 865.438   5
 -16  -2  -5 2673.75 793.643   2
 -16   2  -6 262.779 173.272   2
 -16   2  -6 54.5864 379.217   5
 -16  -2  -6-168.467 212.717   2
 -16   2  -7 410.576 344.088   2
 -16   2  -7 737.471 469.624   5
 -16  -2  -7 150.561 176.424   2
 -16   2  -8 578.298 374.062   2
 -16   2  -8 677.983 372.905   5
 -16  -2  -8 1261.54 601.356   2
 -16   2  -9 96.5115 96.8049   2
 -16   2  -9-172.099 199.155   5
 -16  -2  -9 117.641 126.870   2
 -16   2 -10-228.207 292.906   2
 -16  -2 -10 166.684 131.154   2
 -16   2 -10 426.224 228.209   5
 -16   2 -11 111.958 206.849   2
 -16   2 -11 161.387 236.123   5
 -16   2 -12 263.094 286.601   2
 -16   2 -12-152.201 330.422   5
 -16   2 -13-158.417 398.637   5
 -16   2 -13-256.517 284.825   2
 -16   2 -14 41.0790 218.985   5
 -16   2 -14-351.236 401.265   2
 -16   2 -15 91.1646 192.664   5
 -16   2 -15 240.946 313.204   2
 -16   2 -16 530.443 430.563   2
  16   3 -24 16.7117 227.364   5
  16  -3 -23 982.297 594.194   1
  16   3 -23 129.298 195.861   5
  16  -3 -22 247.188 291.084   1
  16   3 -22 336.859 539.190   5
  16  -3 -21 511.671 389.940   1
  16   3 -21-0.63428 205.720   5
  16  -3 -20 119.983 198.604   1
  16   3 -20 65.6173 137.818   5
  16  -3 -19 1814.76 704.296   1
  16   3 -19 1656.00 698.140   5
  16   3 -18 168.737 198.073   5
  16  -3 -18 1026.39 554.469   1
  16   3 -17 269.899 215.296   5
  16  -3 -17 623.515 423.678   1
  16  -3 -16 196.718 190.920   1
  16  -3 -15 394.675 374.751   1
  16  -3 -14 3258.15 980.810   1
  16  -3 -13 4924.19 1161.18   1
  16  -3 -12 1894.74 710.039   1
 -16  -3  11 769.137 320.078   2
  16  -3 -11 262.691 142.149   1
 -16  -3  10 1193.87 548.994   4
 -16  -3  10 503.074 264.870   2
  16  -3 -10 1117.84 570.427   1
 -16  -3   9 1204.75 542.670   4
 -16  -3   9 718.654 322.955   2
  16  -3  -9 617.037 378.206   1
 -16  -3   8 685.021 388.840   4
 -16  -3   8 633.322 299.905   2
  16  -3  -8 750.484 446.189   1
 -16   3   8 593.057 143.368   2
 -16  -3   7 2916.22 774.129   4
 -16  -3   7 1936.84 542.475   2
 -16   3   7 1939.24 634.645   2
 -16  -3   6 200.368 199.367   4
 -16  -3   6 183.563 171.937   2
 -16   3   6 230.160 276.386   2
 -16  -3   5 1015.18 469.652   4
 -16  -3   5 1613.04 512.545   2
 -16   3   5 2483.29 756.010   2
 -16  -3   4 1322.51 506.726   4
 -16  -3   4 691.360 322.987   2
 -16   3   4 774.372 506.042   2
 -16  -3   3 1946.96 606.962   4
 -16   3   3 2914.44 916.744   2
 -16  -3   3 883.588 420.120   2
 -16  -3   2 345.788 395.144   4
 -16  -3   2-23.0000 196.501   2
 -16   3   2 915.701 536.518   2
 -16  -3   1 3520.91 817.507   2
 -16   3   1 5866.90 1186.54   2
 -16  -3   1 5672.46 1093.86   4
 -16  -3   0 221.295 349.977   2
 -16   3   0 1520.41 705.098   2
 -16  -3  -1 33981.0 2739.15   2
 -16   3  -1 36908.0 2810.22   2
 -16  -3  -2 10799.4 1576.97   2
 -16   3  -2 14287.1 1725.71   2
 -16   3  -3 720.969 445.159   2
 -16  -3  -3 79.4085 261.411   2
 -16   3  -4 954.452 482.056   2
 -16  -3  -4 921.434 395.369   2
 -16   3  -4-415.353 513.417   5
 -16   3  -5-213.678 354.619   2
 -16  -3  -5-172.980 135.931   2
 -16   3  -5-334.178 477.795   5
 -16   3  -6 109.114 183.638   2
 -16  -3  -6-108.518 300.548   2
 -16   3  -6-167.494 290.223   5
 -16   3  -7 351.991 343.453   2
 -16   3  -7 278.161 468.064   5
 -16   3  -8-130.373 223.902   2
 -16   3  -8 208.084 211.767   5
 -16   3  -9 928.825 456.480   2
 -16   3  -9 765.202 513.853   5
 -16   3 -10 299.541 297.501   2
 -16   3 -10-115.410 126.963   5
 -16   3 -11 1191.33 525.447   2
 -16   3 -11 2596.44 878.863   5
 -16   3 -12-7.16953 81.4849   2
 -16   3 -12 657.787 423.992   5
 -16   3 -13 27.3815 198.681   5
  16   4 -23 412.436 243.695   5
  16   4 -22 52.0196 261.755   5
  16   4 -21 846.179 524.136   5
  16  -4 -21 730.945 530.670   1
  16   4 -20 105.920 72.2128   5
  16  -4 -20 755.977 536.667   1
  16  -4 -19 624.881 533.918   1
  16   4 -19 746.114 479.582   5
  16  -4 -18 444.828 558.430   1
  16   4 -18-130.424 164.401   5
  16   4 -17 961.817 497.280   5
  16  -4 -17 1855.76 786.653   1
  16   4 -16 401.942 306.966   5
  16  -4 -16 255.239 223.378   1
  16  -4 -15 101.977 224.036   1
  16  -4 -14 219.182 212.162   1
 -16  -4  13 254.880 200.246   4
  16  -4 -13 40.5462 253.416   1
  16  -4 -12 142.768 248.797   1
 -16  -4  12 345.883 291.763   4
 -16  -4  11-112.563 106.348   4
  16  -4 -11-288.312 297.679   1
 -16  -4  10 259.698 229.032   4
 -16  -4   9 513.327 330.000   4
 -16  -4   8 453.191 362.699   4
 -16   4   8 772.393 385.804   2
 -16  -4   7 1002.69 393.509   4
 -16   4   7 2073.09 819.234   2
 -16  -4   6 145.261 237.798   4
 -16   4   6-294.660 417.942   2
 -16  -4   5 11.0856 219.161   4
 -16   4   5 588.180 356.166   2
 -16  -4   4 2243.62 744.611   4
 -16   4   4 3815.64 1066.89   2
 -16  -4   4 2428.73 692.489   2
 -16  -4   3 1425.37 596.097   4
 -16   4   3 1604.56 669.103   2
 -16  -4   3 1442.35 558.449   2
 -16   4   2 2202.01 821.727   2
 -16  -4   2 2022.72 722.498   4
 -16  -4   2 2020.17 668.865   2
 -16  -4   1 1995.47 660.192   2
 -16   4   1 2915.29 892.076   2
 -16  -4   1 3625.87 951.663   4
 -16  -4   0 1372.82 558.172   2
 -16   4   0 2820.00 870.100   2
 -16   4  -1 447.702 457.026   2
 -16   4  -2 523.023 410.827   2
 -16   4  -2 332.183 334.142   5
 -16   4  -3 798.014 433.897   2
 -16   4  -3 401.835 438.590   5
 -16   4  -4 2606.22 745.153   2
 -16   4  -4 4619.89 1294.98   5
 -16   4  -5-101.622 268.014   2
 -16   4  -5-193.852 314.040   5
 -16   4  -6-72.1031 63.6990   2
 -16   4  -6 149.515 185.470   5
 -16   4  -7 185.611 241.689   5
 -16   4  -8 61.6098 143.905   5
 -16   4  -9-195.792 406.432   5
  16  -5 -16 1600.25 925.294   1
 -16  -5  15 160.678 308.323   4
 -16  -5  14 444.080 389.061   4
 -16  -5  13-30.3235 188.028   4
 -16  -5  12-214.846 159.224   4
 -16  -5  11 924.634 635.013   4
 -16  -5  10-106.091 240.743   4
 -16  -5   9 218.973 354.924   4
 -16  -5   8 1470.05 636.504   4
 -16   5   8 2105.22 894.852   2
 -16  -5   7 1054.38 525.824   4
 -16   5   7 464.535 301.761   2
 -16  -5   6 3124.85 1010.80   4
 -16   5   6 4589.08 1266.87   2
 -16  -5   5 774.454 459.007   4
 -16   5   5 1182.43 680.017   2
 -16  -5   4 987.529 556.882   4
 -16   5   4 494.487 406.467   2
 -16  -5   3 836.605 483.419   4
 -16   5   3 1593.22 736.644   2
 -16  -5   2 324.347 261.552   4
 -16   5   2 905.019 622.584   2
 -16   5   1 874.450 559.959   2
 -16   5   0 56.5046 299.503   5
 -16   5  -1 568.596 519.596   5
 -16   5  -2 708.438 555.111   5
 -16   5  -3 384.077 358.193   5
 -16   5  -4 750.355 584.850   5
 -16   5  -5-645.199 511.194   5
 -16   6   9-727.057 760.448   2
 -16   6   3-76.9127 496.027   5
 -16   6   2 235.606 335.744   5
 -17   0  27-345.157 343.172   3
 -17   0  26-8.76806 349.642   3
 -17   0  25 803.005 665.311   3
 -17   0  24 612.590 648.196   3
 -17   0  23 242.126 371.826   3
 -17   0  22 265.534 406.659   3
 -17   0  21 1217.57 561.453   3
 -17   0  20 384.852 280.835   3
 -17   0  19 639.572 449.031   3
 -17   0  18 261.319 222.370   3
 -17   0  17 971.983 475.348   3
 -17   0  16 783.471 460.105   3
 -17   0  15 71074.7 3683.61   3
 -17   0  14 144.961 170.812   3
 -17   0  14 236.851 238.054   2
 -17   0  13 19764.6 2192.94   2
 -17   0  13 17835.5 1730.03   3
 -17   0  12-156.553 228.146   3
 -17   0  12-264.877 266.460   2
 -17   0  11 4380.56 756.566   3
 -17   0  11 5443.71 1100.74   2
 -17   0  10 1683.61 1076.28   2
 -17   0   9 1666.87 602.939   2
  17   0  -8-70.3352 168.933   1
 -17   0   8 682.243 426.061   2
  17   0  -7 13811.4 1437.03   1
 -17   0   7 14716.0 1705.59   2
 -17   0   6 238.161 181.805   4
  17   0  -6 30.6967 69.8019   1
 -17   0   6 290.017 407.994   2
 -17   0   5 6662.64 1123.54   2
 -17   0   5 5435.76 666.554   4
 -17   0   4-103.240 97.3985   4
 -17   0   4 478.698 500.777   2
 -17   0   3 2991.33 798.867   2
 -17   0   2 187.697 259.391   2
 -17   0   1-346.103 327.479   2
 -17   0   0 613.554 419.930   2
 -17   0  -1 3042.31 734.219   2
 -17   0  -2 110.875 288.916   2
 -17   0  -3 236.579 321.411   2
 -17   0  -4 17.2148 200.132   2
 -17   0  -5 283.388 201.378   2
 -17   0  -5-136.682 126.274   5
 -17   0  -6-42.7532 210.269   2
 -17   0  -6-37.7004 210.000   5
 -17   0  -7 1510.45 515.777   2
 -17   0  -7 1138.77 478.431   5
 -17   0  -8-262.225 136.630   2
 -17   0  -8-176.440 281.541   5
 -17   0  -9 973.827 432.460   2
 -17   0  -9 77.5883 119.368   5
 -17   0 -10 675.985 561.839   5
 -17   0 -10 799.843 599.728   2
 -17   0 -11 365.433 273.575   5
 -17   0 -11 502.063 373.147   2
 -17   0 -12 137.227 97.8538   5
 -17   0 -12-147.969 134.646   2
 -17   0 -13 185.737 243.251   5
 -17   0 -13 525.490 387.237   2
 -17   0 -14-104.359 67.6649   5
 -17   0 -14 641.601 490.942   2
 -17   0 -15 333.867 226.285   5
 -17  -1  27-164.108 187.240   3
 -17   1  27 442.145 715.088   3
 -17  -1  26-694.557 456.129   3
 -17   1  26-870.248 621.713   3
 -17  -1  25-216.632 313.731   3
 -17   1  25 1192.94 829.564   3
 -17  -1  24 458.351 465.350   3
 -17   1  24 309.164 192.576   3
 -17  -1  23-198.611 325.924   3
 -17   1  23 589.806 541.608   3
 -17  -1  22 35.0431 390.723   3
 -17   1  22 471.034 366.856   3
 -17  -1  21-90.6904 287.240   3
 -17   1  21 1053.55 621.834   3
 -17  -1  20 112.621 168.751   3
 -17   1  20 1332.17 689.562   3
 -17  -1  19 5955.94 1268.81   3
 -17   1  19 7872.33 1427.28   3
 -17  -1  18 202.830 320.939   3
 -17   1  18 191.845 350.814   3
 -17  -1  18 53.4976 226.011   2
 -17  -1  17 2704.24 823.117   3
 -17  -1  17 4386.44 1053.23   2
 -17   1  17 4802.76 1011.72   3
 -17  -1  16 1667.86 630.625   3
 -17  -1  16 1392.78 530.755   2
 -17   1  16 948.487 402.457   3
 -17  -1  15-279.191 306.801   3
 -17  -1  15 157.260 229.188   2
 -17   1  15 124.286 249.857   3
 -17  -1  14-266.540 365.287   3
 -17  -1  14 122.371 157.377   2
 -17   1  14 47.1494 210.991   3
 -17  -1  13 440.240 316.178   2
 -17   1  13 499.777 299.899   3
 -17  -1  12 83.6994 207.360   2
 -17   1  12 130.918 88.9505   3
  17  -1 -12 96.3503 85.2557   1
 -17  -1  11 2050.08 646.377   2
  17  -1 -11 2143.75 645.195   1
 -17   1  11 1818.96 443.102   3
 -17   1  11 1796.74 609.978   2
 -17   1  10 9600.54 1513.65   2
 -17   1  10 7099.54 850.438   3
  17  -1 -10 6382.54 1105.19   1
 -17  -1  10 7733.69 1219.94   2
 -17   1   9 7076.45 761.387   3
 -17   1   9 9180.13 1440.63   2
  17  -1  -9 10179.9 1375.92   1
 -17  -1   9 9182.84 1316.12   2
 -17   1   8 19573.3 2072.26   2
 -17  -1   8 19123.7 1892.43   2
  17  -1  -8 18573.8 1846.30   1
 -17   1   7 4370.88 970.073   2
 -17  -1   7 3607.44 707.433   4
 -17  -1   7 4275.24 892.081   2
  17  -1  -7 4729.79 931.522   1
 -17   1   6 7755.33 1290.42   2
 -17  -1   6 6183.12 1062.29   2
  17  -1  -6 6504.85 1089.71   1
 -17  -1   6 5650.70 852.709   4
 -17   1   5 5998.39 1148.41   2
 -17  -1   5 7258.01 1138.78   2
 -17  -1   5 5781.26 851.715   4
  17  -1  -5 5717.27 992.862   1
 -17  -1   4 4314.86 734.083   4
  17  -1  -4 3886.90 815.265   1
 -17  -1   4 5132.73 955.841   2
  17   1  -4 4166.48 701.267   1
 -17   1   4 5392.40 1040.52   2
 -17  -1   3 9730.03 1337.37   2
 -17   1   3 13125.0 1658.21   2
  17   1  -3 10245.6 1080.91   1
 -17  -1   3 11158.3 1164.81   4
  17   1  -2 16859.9 1368.91   1
 -17  -1   2 17461.7 1773.42   2
 -17   1   2 19597.1 1940.56   2
 -17  -1   1 10778.6 1407.09   2
 -17   1   1 11529.6 1488.06   2
 -17  -1   0 10297.1 1407.33   2
 -17   1   0 10072.7 1393.07   2
 -17  -1  -1 2255.40 702.423   2
 -17   1  -1 3355.83 788.528   2
 -17  -1  -2 6506.02 1165.23   2
 -17   1  -2 7557.49 1214.19   2
 -17  -1  -3 489.261 378.317   2
 -17   1  -3 101.597 188.753   2
 -17  -1  -4 263.337 228.395   2
 -17   1  -4 231.049 253.520   2
 -17  -1  -4 521.397 250.014   5
 -17  -1  -5 4705.04 1054.86   2
 -17   1  -5 5139.95 1060.66   2
 -17  -1  -5 4181.26 838.047   5
 -17   1  -5 3844.08 962.002   5
 -17  -1  -6-255.716 285.016   2
 -17   1  -6 253.527 324.496   2
 -17  -1  -6-87.5150 167.880   5
 -17   1  -6 137.119 186.703   5
 -17  -1  -7 377.865 318.903   2
 -17   1  -7 442.064 318.524   2
 -17  -1  -7 459.362 322.047   5
 -17   1  -7 1044.27 696.682   5
 -17   1  -8 440.180 334.421   2
 -17  -1  -8 77.5929 188.336   5
 -17   1  -8 221.873 240.488   5
 -17  -1  -8 318.989 371.121   2
 -17   1  -9 1235.22 568.489   2
 -17  -1  -9 310.326 254.863   5
 -17   1  -9 1157.57 557.593   5
 -17  -1  -9 1194.82 554.110   2
 -17   1 -10 361.798 322.511   2
 -17   1 -10 372.867 356.149   5
 -17  -1 -10 216.561 160.127   2
 -17   1 -11-371.876 468.138   2
 -17   1 -11 112.798 294.271   5
 -17  -1 -11 604.661 432.032   2
 -17   1 -12 531.865 440.765   5
 -17   1 -12 187.209 147.935   2
 -17  -1 -13-140.534 293.863   2
 -17   1 -13 419.324 389.481   5
 -17   1 -13 440.320 291.945   2
 -17   1 -14-102.485 191.917   5
 -17   1 -14 210.412 283.242   2
 -17   1 -15 964.912 567.850   5
 -17   1 -15 1013.25 539.164   2
 -17   1 -16 75.9607 174.100   2
 -17   1 -16 133.064 214.874   5
 -17   1 -17 464.877 318.694   5
 -17  -2  25-335.657 546.108   3
  17   2 -25 58.1033 213.612   5
  17   2 -24 748.465 485.957   5
 -17  -2  24 1743.77 790.241   3
 -17  -2  23-555.992 615.270   3
 -17  -2  22 2553.48 903.666   3
 -17  -2  21-207.028 126.717   3
 -17  -2  20-575.327 561.465   3
 -17  -2  19 5391.44 1261.05   3
 -17  -2  18-197.446 355.056   3
  17  -2 -18-170.258 228.505   1
 -17  -2  17 191.276 223.179   2
  17  -2 -17-248.484 81.1554   1
 -17  -2  16-67.6254 188.184   2
  17  -2 -16 158.382 230.394   1
 -17  -2  15 748.420 358.675   2
  17  -2 -15 633.599 302.879   1
  17  -2 -14 62.9608 210.547   1
 -17  -2  14 249.109 249.905   2
  17  -2 -13-161.543 111.603   1
 -17  -2  13 157.210 237.720   2
  17  -2 -12 351.570 332.777   1
 -17  -2  12 509.374 281.914   2
  17  -2 -11 4061.50 980.354   1
 -17  -2  11 3611.00 756.668   2
 -17   2  10-101.975 515.092   2
 -17  -2  10 395.808 244.873   2
  17  -2 -10 157.738 131.930   1
  17  -2  -9 632.769 368.830   1
 -17  -2   9 679.010 305.718   4
 -17   2   9 630.065 317.887   2
 -17  -2   9 690.062 304.541   2
 -17  -2   8 1408.62 511.652   4
 -17   2   8 1684.76 571.955   2
  17  -2  -8 1161.90 470.511   1
 -17  -2   8 1862.90 554.357   2
  17  -2  -7 305.927 329.622   1
 -17  -2   7 443.599 327.190   4
 -17   2   7-104.400 292.253   2
 -17  -2   7 297.235 285.889   2
 -17  -2   6 4580.49 867.886   4
  17  -2  -6 5090.62 1052.17   1
 -17   2   6 5570.04 1131.85   2
 -17  -2   6 5659.21 969.384   2
 -17  -2   5 3388.92 754.714   4
 -17   2   5 5269.44 1136.85   2
 -17  -2   5 4018.78 832.419   2
 -17   2   4 5823.27 1102.96   2
 -17  -2   4 5149.33 932.212   2
 -17  -2   4 6140.99 1011.33   4
 -17  -2   3 6567.38 1061.58   2
 -17   2   3 7518.21 1277.15   2
 -17  -2   3 7188.14 1096.34   4
 -17  -2   2 251.556 175.334   4
 -17  -2   2 27.4374 224.071   2
 -17   2   2 368.095 353.041   2
 -17  -2   1 9303.46 1311.61   2
 -17   2   1 11206.7 1519.76   2
 -17  -2   0 492.294 323.409   2
 -17   2   0 461.663 489.816   2
 -17  -2  -1 791.501 407.189   2
 -17   2  -1 571.269 337.694   2
 -17  -2  -2 11883.1 1612.04   2
 -17   2  -2 13482.0 1666.50   2
 -17  -2  -3 1445.10 584.917   2
 -17   2  -3 929.115 427.936   2
 -17  -2  -4 236.793 224.789   2
 -17   2  -4 190.980 108.427   2
 -17   2  -4 510.486 433.297   5
 -17   2  -5 5538.46 1086.13   2
 -17   2  -5 5051.54 1173.60   5
 -17  -2  -5 5264.15 1135.34   2
 -17   2  -6 412.583 422.389   2
 -17   2  -6 225.339 298.376   5
 -17  -2  -6-248.612 333.639   2
 -17   2  -7 1277.22 557.433   2
 -17   2  -7 1249.87 576.768   5
 -17  -2  -7 946.024 521.074   2
 -17   2  -8 2339.34 733.641   2
 -17   2  -8 4906.35 1150.51   5
 -17  -2  -8 4526.07 1134.89   2
 -17   2  -9-22.6548 137.978   2
 -17   2  -9-197.046 387.428   5
 -17  -2  -9 194.704 452.336   2
 -17   2 -10 1750.57 634.932   2
 -17  -2 -10 1234.58 566.039   2
 -17   2 -10 2411.70 836.654   5
 -17   2 -11 62.0856 150.928   2
 -17   2 -11 127.397 202.087   5
 -17   2 -12-272.786 305.887   2
 -17   2 -12 403.271 371.659   5
 -17   2 -13-133.757 303.879   5
 -17   2 -13 738.175 485.728   2
 -17   2 -14-157.371 292.151   5
 -17   2 -14 616.323 500.721   2
 -17   2 -15-248.054 292.969   2
 -17   2 -16 3.58599 73.1757   2
  17   3 -24-775.250 519.855   5
  17  -3 -23-35.0538 319.719   1
  17   3 -23 60.4154 169.303   5
  17  -3 -22-14.6159 304.319   1
  17   3 -22-88.3616 293.852   5
  17  -3 -21 60.9994 216.798   1
  17   3 -21-285.663 421.924   5
  17   3 -20 2136.72 790.698   5
  17  -3 -20 3307.87 1007.88   1
  17  -3 -19 2468.02 903.731   1
  17  -3 -18 307.079 302.940   1
  17  -3 -17 316.141 318.084   1
  17  -3 -16 1129.76 597.251   1
  17  -3 -15 1210.19 584.930   1
  17  -3 -14-69.7808 91.2484   1
  17  -3 -13 2618.46 843.049   1
  17  -3 -12 1555.86 674.021   1
 -17  -3  11 4127.91 1021.67   4
 -17  -3  11 2079.88 559.384   2
  17  -3 -11 3020.28 857.451   1
 -17  -3  10 9500.81 1539.66   4
  17  -3 -10 7267.65 1369.79   1
 -17  -3  10 5832.50 912.727   2
 -17  -3   9 4219.08 993.875   4
 -17  -3   9 3691.71 736.585   2
 -17   3   9 4841.43 1253.38   2
  17  -3  -9 5639.50 1211.98   1
 -17  -3   8 534.390 277.989   4
  17  -3  -8 468.320 356.536   1
 -17  -3   8 509.833 295.782   2
 -17   3   8 276.468 178.438   2
 -17  -3   7 85.4864 148.083   4
 -17  -3   7 122.851 57.4734   2
 -17   3   7-146.069 373.268   2
 -17  -3   6 1545.04 556.416   4
 -17  -3   6 546.773 305.074   2
 -17   3   6 982.761 432.377   2
 -17  -3   5 9.21751 101.463   4
 -17  -3   5 138.789 182.567   2
 -17  -3   4 1425.12 525.680   4
 -17   3   4 1417.53 679.003   2
 -17  -3   4 1570.31 540.636   2
 -17   3   3 5028.56 1117.70   2
 -17  -3   3 3784.76 873.721   4
 -17  -3   3 3747.35 807.740   2
 -17  -3   2 18465.5 1896.48   2
 -17  -3   2 20371.3 2060.44   4
 -17   3   2 23341.4 2380.66   2
 -17  -3   1 9379.12 1370.66   2
 -17   3   1 12832.0 1745.88   2
 -17  -3   1 11726.2 1596.27   4
 -17  -3   0 4337.96 971.973   2
 -17   3   0 5119.47 1089.74   2
 -17   3  -1 526.675 413.742   2
 -17  -3  -1 834.955 427.521   2
 -17   3  -2 4747.93 1008.40   2
 -17  -3  -2 1951.95 680.509   2
 -17   3  -3-13.9443 133.826   2
 -17  -3  -3-53.9038 263.258   2
 -17   3  -4 491.339 329.803   2
 -17  -3  -4 1180.75 584.137   2
 -17   3  -4 723.280 479.318   5
 -17   3  -5 71.7988 205.105   2
 -17  -3  -5 241.748 268.418   2
 -17   3  -5 710.691 517.317   5
 -17   3  -6-23.2226 141.273   2
 -17  -3  -6-52.1761 203.344   2
 -17   3  -6-21.3359 95.5105   5
 -17   3  -7 88.1438 332.745   2
 -17  -3  -7-79.4486 275.692   2
 -17   3  -7 132.658 360.197   5
 -17   3  -8 41.7634 149.275   2
 -17   3  -8-177.011 256.591   5
 -17   3  -9 188.920 258.997   2
 -17   3  -9 80.3041 275.288   5
 -17   3 -10 218.432 278.062   2
 -17   3 -10 94.1997 101.196   5
 -17   3 -11 4.47891 222.322   2
 -17   3 -11-210.291 332.710   5
 -17   3 -12-155.011 268.868   2
 -17   3 -12-281.443 429.452   5
  17   4 -23-175.777 251.140   5
  17   4 -22 282.016 343.143   5
  17   4 -21 72.2605 173.503   5
  17  -4 -20 1195.77 682.092   1
  17   4 -20 461.346 374.541   5
  17  -4 -19-52.5087 101.197   1
  17   4 -19 200.501 205.864   5
  17  -4 -18 64.2554 162.558   1
  17  -4 -17 820.434 548.830   1
  17  -4 -16-341.182 380.211   1
  17  -4 -15-215.599 376.916   1
 -17  -4  14-327.650 372.613   4
  17  -4 -14 323.877 395.817   1
 -17  -4  13 331.667 98.9674   4
  17  -4 -13 267.203 329.706   1
 -17  -4  12-234.440 362.433   4
  17  -4 -12 289.739 346.868   1
  17  -4 -11-15.6676 223.244   1
 -17  -4  11-417.320 338.102   4
 -17  -4  10-187.241 112.793   4
 -17  -4   9-286.137 333.173   4
 -17   4   9 68.7709 216.945   2
 -17  -4   8 206.376 207.348   4
 -17   4   8 444.918 192.598   2
 -17  -4   7 2148.70 741.512   4
 -17   4   7 1301.99 515.619   2
 -17  -4   6-144.465 189.132   4
 -17   4   6-75.1596 211.957   2
 -17  -4   5 1182.12 526.105   4
 -17   4   5 733.184 481.622   2
 -17  -4   4 814.318 444.737   4
 -17   4   4 850.696 530.385   2
 -17  -4   3 880.298 532.930   4
 -17   4   3 701.756 482.332   2
 -17  -4   3 99.6647 120.142   2
 -17  -4   2-278.358 224.767   4
 -17  -4   2 53.0097 197.951   2
 -17   4   2-57.1411 156.598   2
 -17  -4   1 185.440 201.549   2
 -17   4   1 1105.58 595.608   2
 -17  -4   0 993.667 435.727   2
 -17   4   0 2092.03 724.150   2
 -17  -4  -1 2024.60 686.594   2
 -17   4  -1 2316.94 779.566   2
 -17   4  -2 1000.80 493.582   2
 -17   4  -2 1213.23 697.151   5
 -17   4  -3 1828.08 659.322   2
 -17   4  -3 2174.75 847.341   5
 -17   4  -4 398.298 241.716   2
 -17   4  -4 302.923 417.399   5
 -17   4  -5-516.121 411.938   2
 -17   4  -5 772.635 556.033   5
 -17   4  -6-297.802 396.890   2
 -17   4  -6 495.811 410.006   5
 -17   4  -7 333.928 403.996   5
 -17   4  -8 356.085 420.925   5
 -17  -5  15-185.816 252.326   4
 -17  -5  14 499.350 495.203   4
 -17  -5  13-268.306 425.220   4
 -17  -5  12 1469.07 768.472   4
 -17  -5  11 114.761 175.621   4
 -17  -5  10-1045.29 612.219   4
 -17  -5   9 800.427 512.516   4
 -17   5   9 1175.80 691.872   2
 -17  -5   8-132.552 188.258   4
 -17   5   8-502.458 635.964   2
 -17  -5   7-55.4882 219.164   4
 -17   5   7 153.755 293.636   2
 -17  -5   6 316.081 379.267   4
 -17   5   6 66.4573 321.653   2
 -17  -5   5 450.503 414.419   4
 -17   5   5-417.666 405.607   2
 -17  -5   4 103.300 254.383   4
 -17   5   4 808.296 555.971   2
 -17  -5   3 68.2120 239.100   4
 -17   5   3 9.15534 246.091   2
 -17   5   2 50.8413 329.352   2
 -17  -5   2 245.749 447.827   4
 -17   5   1 81.1386 239.345   2
 -17   5   0 185.327 206.242   5
 -17   5  -1-87.4768 358.659   5
 -17   5  -2 528.798 463.898   5
 -17   5  -3 1119.79 698.189   5
 -18   0  27 412.092 566.359   3
 -18   0  26 30.8202 209.819   3
 -18   0  25 1013.58 666.867   3
 -18   0  24 280.408 364.581   3
 -18   0  23 821.465 564.645   3
 -18   0  22 266.155 280.020   3
 -18   0  21-219.291 336.139   3
 -18   0  20 368.088 337.439   3
 -18   0  19-45.6280 282.182   3
 -18   0  18 6702.28 1261.10   3
 -18   0  17-126.326 245.853   3
 -18   0  16 29357.2 2468.18   3
 -18   0  15 314.073 325.172   3
 -18   0  15 758.472 506.132   2
 -18   0  14 8691.33 1236.75   3
 -18   0  14 10523.3 1667.46   2
 -18   0  13-57.9571 183.651   3
 -18   0  13 6.25460 226.030   2
 -18   0  12 6966.76 1018.76   3
 -18   0  12 6570.23 1275.23   2
 -18   0  11 7379.81 1414.44   2
 -18   0  10 1325.58 574.641   2
  18   0  -9 23.5612 81.3599   1
 -18   0   9 522.925 363.104   2
 -18   0   8 6908.48 1238.70   2
  18   0  -8 5501.15 929.529   1
 -18   0   7 135.687 141.095   4
  18   0  -7 70.3354 129.709   1
 -18   0   7 461.007 367.652   2
  18   0  -6 3615.34 757.477   1
 -18   0   6 3876.99 945.676   2
 -18   0   6 3347.08 542.406   4
  18   0  -5 339.021 258.000   1
 -18   0   5 358.577 357.081   2
 -18   0   4 24183.9 2230.66   2
  18   0  -4 22245.5 1863.09   1
 -18   0   3-13.0566 198.067   2
 -18   0   2 10698.0 1438.22   2
 -18   0   1 173.600 84.0079   2
 -18   0   0 2669.29 743.550   2
 -18   0  -1 89.9294 95.5011   2
 -18   0  -2 11408.7 1563.27   2
 -18   0  -3 1114.94 566.111   2
 -18   0  -4 3701.88 895.403   2
 -18   0  -5 112.252 165.302   2
 -18   0  -5-66.4282 162.827   5
 -18   0  -6 4440.90 1029.15   2
 -18   0  -6 4104.84 945.266   5
 -18   0  -7 419.597 346.284   2
 -18   0  -7-254.039 270.683   5
 -18   0  -8 363.519 219.136   2
 -18   0  -8 12.5704 133.553   5
 -18   0  -9-51.7632 117.384   2
 -18   0  -9-296.982 255.926   5
 -18   0 -10 309.006 442.468   5
 -18   0 -10 486.042 364.898   2
 -18   0 -11 1626.18 632.691   5
 -18   0 -11 2388.92 887.204   2
 -18   0 -12-33.5886 128.760   5
 -18   0 -12 705.706 561.163   2
 -18   0 -13-110.755 217.830   5
 -18   0 -13 132.015 281.068   2
 -18   0 -14 239.694 362.317   2
 -18   1  27 296.177 550.424   3
 -18  -1  26-516.364 615.420   3
 -18   1  26 488.399 677.686   3
 -18  -1  25-685.755 679.132   3
 -18   1  25 1317.45 898.999   3
 -18  -1  24 437.558 224.097   3
 -18   1  24 1460.64 862.372   3
 -18  -1  23-150.894 360.514   3
 -18   1  23 80.1143 174.985   3
 -18  -1  22 503.851 388.010   3
 -18   1  22 797.413 651.406   3
 -18  -1  21 187.336 164.307   3
 -18   1  21 329.298 409.296   3
 -18  -1  20 127.111 233.705   3
 -18  -1  20 142.999 162.658   2
 -18  -1  19 177.967 321.519   3
 -18  -1  19 369.494 305.189   2
 -18   1  19 403.431 369.765   3
 -18  -1  18 4127.86 1051.62   3
 -18  -1  18 5736.01 1239.72   2
 -18   1  18 6167.47 1253.99   3
 -18  -1  17 5635.84 1161.45   3
 -18  -1  17 5873.12 1201.70   2
 -18   1  17 6764.91 1199.67   3
 -18  -1  16 1627.52 587.564   3
 -18  -1  16 2412.22 736.972   2
 -18   1  16 2269.13 685.772   3
 -18  -1  15-382.566 480.545   3
 -18  -1  15 52.6712 102.121   2
 -18  -1  14-385.930 399.413   2
 -18   1  14-226.724 278.727   3
 -18  -1  13 667.134 405.912   2
 -18   1  13 129.156 195.615   3
 -18   1  13 248.538 227.213   2
  18  -1 -13 61.9693 239.402   1
 -18  -1  12 1023.39 505.749   2
  18  -1 -12 1331.50 509.459   1
 -18   1  12 1059.64 333.662   3
 -18   1  12 646.198 432.988   2
 -18  -1  11 793.275 483.446   2
  18  -1 -11-111.021 346.815   1
 -18   1  11-198.197 394.544   2
  18  -1 -10 340.724 290.246   1
 -18   1  10-32.0385 371.596   2
 -18  -1  10 810.084 402.702   2
 -18   1   9 5824.65 1194.74   2
  18  -1  -9 4175.40 915.836   1
 -18  -1   9 5893.58 1077.76   2
 -18  -1   8 6239.54 948.663   4
 -18   1   8 7534.92 1331.59   2
 -18  -1   8 8534.27 1290.51   2
  18  -1  -8 6224.22 1093.79   1
 -18   1   7 6307.04 1216.35   2
  18  -1  -7 6185.69 1071.02   1
  18   1  -7 7951.37 1035.49   1
 -18  -1   7 5999.54 1105.22   2
 -18  -1   7 4837.29 820.585   4
 -18   1   6 12520.2 1696.94   2
 -18  -1   6 11826.1 1497.77   2
  18  -1  -6 11226.6 1468.57   1
 -18  -1   6 10043.1 1164.40   4
 -18  -1   5 1485.90 443.515   4
  18  -1  -5 990.279 420.684   1
 -18  -1   5 1230.10 489.629   2
 -18   1   5 2057.23 723.097   2
  18  -1  -4 11066.8 1465.01   1
 -18  -1   4 10969.1 1432.36   2
 -18   1   4 13437.9 1700.44   2
 -18  -1   4 11334.1 1210.85   4
 -18  -1   3 6166.54 1075.82   2
 -18  -1   3 6149.62 892.885   4
  18   1  -3 5264.55 802.427   1
 -18  -1   2 3586.26 852.648   2
 -18   1   2 3535.71 834.885   2
 -18  -1   1 5535.14 1053.44   2
 -18   1   1 5945.97 1085.13   2
 -18  -1   0 137.121 187.217   2
 -18   1   0 6.36598 126.971   2
 -18  -1  -1 4211.36 936.228   2
 -18   1  -1 5199.83 1016.18   2
 -18  -1  -2 1902.20 673.938   2
 -18   1  -2 490.551 361.304   2
 -18  -1  -3 9414.71 1443.33   2
 -18   1  -3 9842.68 1432.36   2
 -18  -1  -4 1445.89 579.733   2
 -18   1  -4 763.817 498.015   2
 -18  -1  -4 903.266 402.617   5
 -18  -1  -5 671.188 464.089   2
 -18   1  -5 688.998 466.570   2
 -18  -1  -5-77.3893 201.866   5
 -18   1  -5 427.390 409.736   5
 -18  -1  -6 6953.96 1315.31   2
 -18  -1  -6 7577.49 1176.62   5
 -18   1  -6 10327.7 1554.65   2
 -18   1  -6 7248.83 1380.65   5
 -18  -1  -7 42.6212 192.510   2
 -18   1  -7 474.115 421.678   2
 -18  -1  -7-79.6142 170.535   5
 -18   1  -7 440.027 387.425   5
 -18   1  -8 318.523 306.445   2
 -18   1  -8 22.8303 222.512   5
 -18   1  -9-658.089 417.696   2
 -18   1  -9-243.496 363.214   5
 -18  -1  -9 185.208 225.656   2
 -18   1 -10 91.1046 148.947   2
 -18   1 -10-132.569 267.606   5
 -18  -1 -10-89.7386 249.877   2
 -18   1 -11 449.594 365.467   2
 -18   1 -11 222.384 270.986   5
 -18  -1 -11 143.128 227.071   2
 -18   1 -12 990.560 551.477   5
 -18  -1 -12 1706.17 766.528   2
 -18   1 -12 2014.50 808.578   2
 -18  -1 -13-90.4263 137.731   2
 -18   1 -13 489.877 397.271   5
 -18   1 -13 322.397 345.883   2
 -18   1 -14 330.926 336.647   5
 -18   1 -14 37.2811 178.523   2
 -18   1 -15 726.890 498.202   5
 -18   1 -15 677.956 528.931   2
 -18   1 -16 457.218 386.753   5
 -18   2  26 1781.93 1019.82   3
 -18  -2  25 888.404 633.199   3
 -18   2  25 38.9787 235.881   3
 -18  -2  24 633.858 520.298   3
 -18  -2  23 768.579 499.151   3
 -18  -2  22 147.547 326.032   3
 -18  -2  21-433.144 357.158   3
 -18  -2  20-458.030 504.510   3
  18  -2 -20-102.255 291.620   1
  18  -2 -19 111.488 228.210   1
  18  -2 -18-303.012 181.849   1
 -18  -2  17 336.047 283.177   2
  18  -2 -17 84.0640 236.673   1
 -18  -2  16 685.035 408.868   2
  18  -2 -16 939.512 506.562   1
  18  -2 -15-29.5713 128.023   1
 -18  -2  15-23.9201 207.147   2
  18  -2 -14 688.328 388.182   1
 -18  -2  14 502.371 322.288   2
  18  -2 -13 310.874 304.679   1
 -18  -2  13 345.905 404.088   2
  18  -2 -12 127.639 196.929   1
 -18  -2  12 269.586 324.315   2
 -18   2  11 531.996 465.286   2
 -18  -2  11 246.154 415.888   2
  18  -2 -11 160.682 110.261   1
  18  -2 -10 793.107 420.349   1
 -18   2  10 1024.18 407.026   2
 -18  -2  10 548.810 342.307   2
 -18  -2   9 64.5031 199.214   4
 -18   2   9-55.1899 175.903   2
  18  -2  -9 210.581 315.119   1
 -18  -2   9 7.80858 158.747   2
 -18  -2   8 54.4266 205.253   4
 -18   2   8 73.0711 230.863   2
 -18  -2   8 316.369 131.039   2
  18  -2  -8 197.154 120.155   1
 -18  -2   7-91.8242 192.797   4
 -18   2   7 37.8299 200.149   2
 -18  -2   7 279.294 224.455   2
  18  -2  -7-9.04094 85.2321   1
  18  -2  -6 317.524 268.920   1
 -18  -2   6 239.542 179.048   4
 -18   2   6 356.324 260.843   2
 -18  -2   6 611.058 365.475   2
 -18   2   5 720.094 460.137   2
 -18  -2   5 682.839 406.115   4
 -18  -2   5 76.8231 92.2112   2
 -18  -2   4 13089.8 1548.85   2
 -18  -2   4 13958.9 1543.40   4
 -18   2   4 15689.6 1925.70   2
 -18  -2   3 2160.28 601.664   4
 -18  -2   3 1344.29 507.776   2
 -18   2   3 1442.43 654.262   2
 -18  -2   2 667.727 380.182   2
 -18   2   2 458.372 419.289   2
 -18  -2   2 521.773 272.722   4
 -18  -2   1 6689.32 1156.28   2
 -18   2   1 7962.11 1341.33   2
 -18  -2   0 6306.98 1158.07   2
 -18   2   0 5945.13 1155.38   2
 -18  -2  -1 377.205 368.770   2
 -18   2  -1 12.1859 250.181   2
 -18  -2  -2 2257.48 815.515   2
 -18   2  -2 1264.80 537.869   2
 -18  -2  -3 2872.60 805.712   2
 -18   2  -3 2653.00 799.430   2
 -18  -2  -4 853.940 524.727   2
 -18   2  -4 605.003 351.680   2
 -18   2  -4 1039.46 484.673   5
 -18   2  -5 227.549 81.5539   2
 -18   2  -5-41.5992 216.069   5
 -18  -2  -5 188.492 108.867   2
 -18   2  -6-97.7639 209.212   2
 -18   2  -6 71.5066 172.046   5
 -18  -2  -6-263.518 426.846   2
 -18   2  -7 2817.67 821.076   2
 -18   2  -7 3048.63 963.411   5
 -18  -2  -7 3052.73 941.392   2
 -18   2  -8 172.141 265.662   2
 -18   2  -8 626.517 344.285   5
 -18  -2  -8 161.972 344.440   2
 -18   2  -9-126.151 203.033   2
 -18   2  -9-45.6774 116.463   5
 -18  -2  -9 229.922 458.299   2
 -18   2 -10 796.256 451.324   2
 -18  -2 -10 1193.56 613.227   2
 -18   2 -10 1046.91 599.701   5
 -18   2 -11 292.394 282.418   2
 -18   2 -11 101.147 182.865   5
 -18   2 -12 70.8984 164.883   2
 -18   2 -12 350.920 291.200   5
 -18   2 -13-190.516 413.478   5
 -18   2 -13-137.757 265.228   2
 -18   2 -14-290.328 281.142   2
 -18   2 -15 642.692 414.312   2
  18  -3 -22-321.370 488.333   1
  18  -3 -21 272.183 359.510   1
  18  -3 -20-229.941 348.158   1
  18  -3 -19 494.539 359.726   1
  18  -3 -18 743.298 539.115   1
  18  -3 -17 469.985 510.969   1
  18  -3 -16 402.591 318.384   1
  18  -3 -15 246.057 351.687   1
  18  -3 -14-96.7987 107.217   1
  18  -3 -13 186.001 302.034   1
 -18  -3  12 839.309 449.438   4
  18  -3 -12 802.840 484.776   1
 -18  -3  11 5622.65 1231.10   4
  18  -3 -11 6065.82 1286.55   1
 -18  -3  10 1005.81 498.852   4
 -18  -3  10 870.488 369.118   2
  18  -3 -10 878.237 484.651   1
 -18   3  10-172.580 459.868   2
 -18  -3   9 712.720 392.962   4
 -18  -3   9 23.5142 65.0746   2
  18  -3  -9 408.979 370.882   1
 -18  -3   8 181.996 232.161   4
 -18  -3   8 620.332 351.069   2
 -18   3   8 687.883 507.090   2
  18  -3  -8 270.140 121.679   1
 -18  -3   7 426.248 291.564   4
 -18  -3   7 802.909 391.264   2
 -18  -3   6 760.165 427.837   4
 -18   3   6 1303.58 645.002   2
 -18  -3   6 883.373 402.510   2
 -18  -3   5 1288.56 486.504   4
 -18   3   5 2212.03 780.415   2
 -18  -3   5 912.660 407.037   2
 -18   3   4 66.6429 160.641   2
 -18  -3   4 3.89801 123.956   2
 -18  -3   3 443.387 314.473   4
 -18  -3   3 216.448 159.669   2
 -18   3   3-29.1437 272.016   2
 -18  -3   2 4029.16 914.842   2
 -18   3   2 4503.18 1064.84   2
 -18  -3   2 4748.89 1017.07   4
 -18  -3   1-54.7555 148.903   2
 -18   3   1 883.959 572.754   2
 -18  -3   0 1849.29 676.049   2
 -18   3   0 2508.90 806.687   2
 -18   3  -1 320.350 211.567   2
 -18  -3  -1 90.4874 94.8509   2
 -18   3  -2 224.355 380.515   2
 -18  -3  -2-261.678 239.370   2
 -18   3  -3 1901.99 619.706   2
 -18  -3  -3 2268.62 790.333   2
 -18   3  -3 1749.94 731.418   5
 -18   3  -4-76.0422 266.933   2
 -18  -3  -4 207.577 190.910   2
 -18   3  -4 103.605 230.243   5
 -18   3  -5 332.295 250.349   2
 -18  -3  -5-9.11697 238.397   2
 -18   3  -5 107.304 192.264   5
 -18   3  -6 523.898 376.879   2
 -18  -3  -6-8.89658 284.813   2
 -18   3  -6 388.730 413.988   5
 -18   3  -7 323.413 246.712   2
 -18  -3  -7-213.821 199.556   2
 -18   3  -7-59.2234 222.077   5
 -18   3  -8-26.8038 169.648   2
 -18   3  -8 321.306 163.713   5
 -18   3  -9-0.55564 119.451   2
 -18   3  -9-20.0609 256.130   5
 -18   3 -10-20.6986 243.526   2
 -18   3 -10 289.631 449.576   5
 -18   3 -11 8.37555 102.351   2
  18  -4 -19-954.463 602.521   1
  18  -4 -18-70.1685 297.929   1
  18  -4 -17 879.504 569.653   1
  18  -4 -16-106.220 197.679   1
  18  -4 -15 282.680 315.876   1
 -18  -4  15 31.0290 107.143   4
 -18  -4  14 535.892 542.378   4
  18  -4 -14-229.525 210.019   1
 -18  -4  13-155.319 286.184   4
  18  -4 -13-131.083 236.082   1
 -18  -4  12-142.946 117.760   4
  18  -4 -12 133.069 176.856   1
 -18  -4  11 121.800 292.042   4
 -18  -4  10 346.478 314.294   4
 -18   4  10 270.895 300.343   2
 -18  -4   9 287.006 235.999   4
 -18   4   9 197.164 346.843   2
 -18  -4   8-228.382 235.625   4
 -18   4   8-939.876 591.793   2
 -18  -4   7 1590.05 623.591   4
 -18   4   7 1444.65 695.943   2
 -18  -4   6 951.937 522.299   4
 -18   4   6 875.166 610.356   2
 -18  -4   5 880.457 454.436   4
 -18   4   5 1419.90 619.006   2
 -18  -4   4 206.997 283.419   4
 -18   4   4 495.038 528.305   2
 -18  -4   3 161.494 158.342   4
 -18  -4   3-135.708 278.768   2
 -18   4   3 230.047 316.692   2
 -18  -4   2-217.382 254.362   2
 -18   4   2-85.0158 173.247   2
 -18  -4   2-90.4680 155.119   4
 -18   4   1 2728.33 884.444   2
 -18  -4   1 1379.92 591.314   2
 -18   4   0 3066.90 915.445   2
 -18  -4   0 1974.26 705.200   2
 -18  -4  -1 611.025 378.807   2
 -18   4  -1 159.748 84.4734   2
 -18   4  -2 1154.91 636.854   2
 -18   4  -2 1197.37 642.472   5
 -18   4  -3 634.730 340.530   2
 -18   4  -3 1601.32 751.698   5
 -18   4  -4 139.991 205.354   2
 -18   4  -4 829.996 543.819   5
 -18   4  -5-89.4076 118.324   2
 -18   4  -5 127.164 230.061   5
 -18   4  -6 899.758 546.422   5
 -18   4  -7 1350.56 678.216   5
 -18  -5  14 816.798 663.596   4
 -18  -5  13-460.400 435.560   4
 -18  -5  12 126.748 268.415   4
 -18  -5  11-103.453 204.227   4
 -18   5  11-660.993 880.090   2
 -18  -5  10 509.287 426.605   4
 -18   5  10 1480.01 754.053   2
 -18  -5   9 156.725 338.691   4
 -18   5   9-362.088 298.506   2
 -18  -5   8-43.4888 131.543   4
 -18   5   8-113.295 505.841   2
 -18  -5   7 139.978 213.894   4
 -18   5   7 564.226 464.383   2
 -18  -5   6 220.996 263.717   4
 -18   5   6 109.214 212.738   2
 -18  -5   5 302.228 377.979   4
 -18   5   5 314.486 334.187   2
 -18  -5   4-619.269 441.953   4
 -18   5   4 231.574 345.524   2
 -18  -5   3-319.672 424.109   4
 -18   5   3 153.272 233.588   2
 -18   5   2 232.441 301.412   2
 -18   5   1 349.078 323.550   2
 -18   5   0 417.979 452.362   5
 -18   5  -1 370.695 334.805   5
 -19   0  27 3567.04 1309.72   3
 -19   0  26 82.9417 518.536   3
 -19   0  25-298.325 396.691   3
 -19   0  24-197.740 339.919   3
 -19   0  23 140.760 218.842   3
 -19   0  22-266.185 300.302   3
 -19   0  21-222.484 357.714   3
 -19   0  20-247.822 290.164   3
 -19   0  19-107.769 233.205   3
 -19   0  18-237.997 282.181   3
 -19   0  17 561.988 355.608   3
 -19   0  17 888.687 542.760   2
 -19   0  16 869.482 503.199   3
 -19   0  16-740.143 621.273   2
 -19   0  15 2578.50 699.212   3
 -19   0  15 1558.25 647.338   2
 -19   0  14-224.654 231.122   3
 -19   0  14-638.175 412.897   2
 -19   0  13 329.776 225.317   3
 -19   0  13 282.232 304.872   2
 -19   0  12-243.342 274.890   2
 -19   0  11 31265.8 2811.27   2
 -19   0  10 159.913 372.849   2
  19   0 -10 163.567 217.390   1
 -19   0   9 5376.97 1148.46   2
  19   0  -9 4788.79 927.133   1
  19   0  -8 11.5253 139.930   1
 -19   0   8 858.270 527.621   2
  19   0  -7 9237.98 1260.47   1
 -19   0   7 11349.2 1619.43   2
  19   0  -6 175.650 217.015   1
 -19   0   6-282.337 268.884   2
 -19   0   5 11736.5 1589.67   2
  19   0  -5 10478.6 1310.63   1
  19   0  -4 956.709 588.780   1
 -19   0   4 2846.01 858.433   2
 -19   0   3 5514.07 1082.70   2
 -19   0   2-73.5945 301.186   2
 -19   0   1-191.533 290.923   2
 -19   0   0 1291.87 474.621   2
 -19   0  -1 1808.63 617.996   2
 -19   0  -2-41.4900 144.765   2
 -19   0  -3 4758.90 1066.39   2
 -19   0  -4 522.369 454.410   2
 -19   0  -4 505.438 280.766   5
 -19   0  -5-12.5315 157.952   2
 -19   0  -5 69.6123 91.7772   5
 -19   0  -6 127.602 206.273   2
 -19   0  -6-28.0159 156.425   5
 -19   0  -7 453.677 273.903   2
 -19   0  -7 211.974 187.478   5
 -19   0  -8 227.001 174.268   2
 -19   0  -8-3.54728 153.479   5
 -19   0  -9-19.9650 173.268   2
 -19   0  -9 45.3393 113.207   5
 -19   0 -10-757.622 438.956   5
 -19   0 -10-241.197 360.453   2
 -19   0 -11-62.6235 292.846   5
 -19   0 -11 805.438 522.112   2
 -19   0 -12 358.449 265.321   5
 -19   0 -12-305.038 194.900   2
 -19   0 -13 107.673 210.656   2
 -19   1  27 191.070 152.132   3
 -19  -1  26-392.934 418.026   3
 -19   1  26-147.869 171.052   3
 -19  -1  25 386.047 242.996   3
 -19   1  25 1082.64 683.058   3
 -19  -1  24 886.937 636.846   3
 -19   1  24 214.982 433.250   3
 -19  -1  23 1059.55 693.851   3
 -19   1  23 914.890 705.832   3
 -19  -1  22 452.703 305.407   3
 -19   1  22 6.41070 172.338   3
 -19  -1  22 148.049 104.867   2
 -19  -1  21-565.780 507.885   3
 -19   1  21 512.333 476.871   3
 -19  -1  21-30.6964 197.274   2
 -19  -1  20 1408.23 619.328   3
 -19  -1  20 1039.76 487.872   2
 -19   1  20 1793.30 749.592   3
 -19  -1  19 5415.33 1224.92   3
 -19  -1  19 3550.12 990.511   2
 -19   1  19 4663.20 1102.67   3
 -19  -1  18 2966.73 896.393   3
 -19  -1  18 2455.39 821.920   2
 -19   1  18 2786.08 777.600   3
 -19  -1  17-96.4478 239.494   3
 -19  -1  17 381.552 260.761   2
 -19   1  17 49.3291 286.747   3
 -19  -1  16-261.403 399.941   3
 -19  -1  16 65.2789 303.267   2
 -19   1  16-265.030 233.318   3
 -19  -1  15 1236.09 522.413   2
 -19  -1  14 540.493 352.924   2
 -19   1  14-125.103 406.851   2
  19  -1 -14 864.499 470.732   1
 -19  -1  13-96.9371 230.961   2
  19  -1 -13 314.470 219.959   1
 -19   1  13 71.4583 212.892   2
 -19  -1  12 592.200 452.586   2
  19  -1 -12 738.457 368.833   1
 -19   1  12 163.515 210.900   2
  19  -1 -11 172.700 86.2771   1
 -19   1  11 180.342 152.891   2
 -19  -1  11 252.903 200.426   2
 -19   1  10 1466.10 652.427   2
  19  -1 -10 1422.74 540.777   1
 -19  -1  10 1619.05 643.604   2
 -19   1   9 1581.56 619.243   2
 -19  -1   9 705.794 323.030   4
  19  -1  -9 422.243 249.639   1
 -19  -1   9 1132.44 511.803   2
  19  -1  -8 123.867 160.898   1
 -19   1   8 151.021 148.404   2
 -19  -1   8-12.9138 55.5799   4
 -19  -1   8 293.828 347.827   2
 -19   1   7 4354.28 1017.92   2
  19   1  -7 4081.57 764.863   1
 -19  -1   7 3748.15 740.152   4
  19  -1  -7 3790.51 854.509   1
 -19  -1   7 4293.57 920.936   2
 -19  -1   6 10228.6 1435.07   2
 -19   1   6 10496.6 1630.51   2
 -19  -1   6 8428.80 1069.46   4
  19  -1  -6 8255.82 1304.97   1
  19  -1  -5 7729.04 1240.92   1
 -19  -1   5 9071.98 1339.06   2
 -19   1   5 8912.28 1429.03   2
 -19  -1   5 8349.78 1052.53   4
 -19  -1   4 50.1166 92.3918   4
 -19  -1   4 17.5487 256.889   2
 -19   1   4 650.578 548.991   2
 -19  -1   3 188.206 137.225   2
 -19   1   3 654.363 404.207   2
 -19  -1   2 371.339 306.431   2
 -19   1   2 463.938 386.835   2
 -19  -1   1 192.953 169.133   2
 -19   1   1 1175.23 462.551   2
 -19  -1   0 441.761 199.937   2
 -19   1   0 41.0517 187.536   2
 -19  -1  -1 618.811 468.397   2
 -19   1  -1 246.149 257.371   2
 -19  -1  -2 2901.04 798.126   2
 -19   1  -2 2869.65 809.646   2
 -19  -1  -3 3629.90 933.027   2
 -19   1  -3 3842.54 921.807   2
 -19  -1  -4 672.493 432.964   2
 -19   1  -4 1994.69 690.117   2
 -19  -1  -4 888.588 415.641   5
 -19  -1  -5 225.119 290.239   2
 -19   1  -5 259.995 273.936   2
 -19  -1  -5 85.0928 128.625   5
 -19   1  -5-295.530 337.396   5
 -19  -1  -6 1513.94 609.550   2
 -19   1  -6 1504.80 563.051   2
 -19  -1  -6 1280.67 495.188   5
 -19   1  -6 1317.48 611.003   5
 -19  -1  -7 80.8843 117.346   2
 -19   1  -7 879.434 474.170   2
 -19   1  -7 485.478 372.598   5
 -19   1  -8 36.8488 198.715   2
 -19   1  -8 19.2554 201.656   5
 -19  -1  -8 50.3873 171.237   2
 -19   1  -9 240.866 152.853   2
 -19   1  -9 83.6793 159.226   5
 -19  -1  -9-11.6041 168.985   2
 -19   1 -10 145.008 83.1076   2
 -19   1 -10-366.439 331.632   5
 -19  -1 -10-320.793 298.842   2
 -19   1 -11 527.793 422.796   2
 -19   1 -11 427.809 367.125   5
 -19  -1 -11 416.471 305.026   2
 -19   1 -12-53.2475 240.259   5
 -19  -1 -12 65.4278 141.601   2
 -19   1 -12 504.214 455.227   2
 -19   1 -13 1385.39 670.546   5
 -19   1 -13 1133.06 556.483   2
 -19   1 -14 248.356 219.328   5
 -19   1 -15 29.7017 129.693   5
 -19  -2  25 43.1411 308.381   3
 -19  -2  24-232.973 370.470   3
 -19  -2  23-75.8265 216.367   3
 -19  -2  22-126.896 350.022   3
  19  -2 -22 10.3732 176.804   1
  19  -2 -21-54.1407 157.697   1
  19  -2 -20-97.5277 249.588   1
  19  -2 -19 483.637 485.913   1
  19  -2 -18 124.974 189.096   1
 -19  -2  17 622.033 366.317   2
  19  -2 -17 924.357 485.788   1
  19  -2 -16 401.458 409.879   1
 -19  -2  16 617.017 323.253   2
  19  -2 -15 254.878 219.275   1
 -19  -2  15 335.356 312.557   2
  19  -2 -14 2908.63 847.545   1
 -19  -2  14 2791.54 770.211   2
  19  -2 -13 344.514 321.517   1
 -19  -2  13 1025.06 467.770   2
 -19   2  12 397.017 280.981   2
 -19  -2  12-94.2199 194.041   2
  19  -2 -12-434.898 331.158   1
  19  -2 -11 1131.20 529.356   1
 -19   2  11-277.892 478.127   2
 -19  -2  11 580.160 318.322   2
 -19  -2  10 23.4349 91.6974   4
  19  -2 -10-32.2669 144.141   1
 -19   2  10-299.842 385.624   2
 -19  -2  10 49.6049 136.560   2
 -19  -2   9 743.114 383.204   4
 -19   2   9 1791.60 725.721   2
 -19  -2   9 975.236 448.959   2
  19  -2  -9 1149.46 535.513   1
 -19  -2   8 921.208 385.826   4
  19  -2  -8 189.721 197.364   1
 -19   2   8 878.224 497.655   2
 -19  -2   8 626.517 358.400   2
 -19  -2   7 5571.94 1005.83   4
 -19   2   7 6150.90 1270.13   2
  19  -2  -7 5117.43 1108.50   1
 -19  -2   7 6583.57 1086.53   2
 -19   2   6 3890.58 1005.48   2
 -19  -2   6 2859.64 722.535   4
 -19  -2   6 2388.51 660.617   2
  19  -2  -6 3299.38 920.887   1
 -19   2   5 4302.12 1049.37   2
 -19  -2   5 3540.53 792.246   4
 -19  -2   5 3053.47 761.284   2
 -19  -2   4 11980.0 1514.27   2
 -19   2   4 14359.8 1926.43   2
 -19  -2   4 11699.1 1447.64   4
 -19  -2   3 2458.54 666.678   4
 -19  -2   3 2311.24 680.370   2
 -19   2   3 2070.67 736.962   2
 -19  -2   2 2866.39 785.998   2
 -19   2   2 2290.11 744.685   2
 -19  -2   1 5387.66 1070.35   2
 -19   2   1 5947.64 1210.32   2
 -19  -2   0 528.101 380.644   2
 -19   2   0-307.429 387.263   2
 -19  -2  -1 2329.84 753.190   2
 -19   2  -1 2048.30 665.698   2
 -19  -2  -2 395.708 329.036   2
 -19   2  -2 55.5104 157.358   2
 -19  -2  -3-45.0804 335.738   2
 -19   2  -3 763.473 465.224   2
 -19  -2  -4 22.4880 154.195   2
 -19   2  -4 350.922 394.044   2
 -19   2  -4 294.583 115.762   5
 -19   2  -5-81.4738 181.984   2
 -19   2  -5-76.8193 150.137   5
 -19  -2  -5-106.713 304.523   2
 -19   2  -6-95.4430 187.530   2
 -19  -2  -6-231.195 135.415   2
 -19   2  -7 371.506 193.402   2
 -19   2  -7 378.104 395.974   5
 -19  -2  -7 322.811 223.476   2
 -19   2  -8 255.312 287.575   2
 -19   2  -8 155.731 277.189   5
 -19  -2  -8 5.99585 305.971   2
 -19   2  -9 87.0838 151.355   2
 -19   2  -9 168.678 208.159   5
 -19  -2  -9 69.9257 326.985   2
 -19   2 -10 24.8694 120.149   2
 -19  -2 -10-93.5006 187.172   2
 -19   2 -10-125.055 247.054   5
 -19   2 -11-275.332 324.700   2
 -19   2 -11 172.745 255.716   5
 -19   2 -12-797.294 529.385   5
 -19   2 -12 464.422 401.888   2
 -19   2 -13 2.78935 68.2132   2
  19  -3 -21 666.612 571.028   1
  19  -3 -20 2318.99 909.883   1
  19  -3 -19 807.309 567.696   1
  19  -3 -18 355.486 411.651   1
  19  -3 -17 64.1810 260.091   1
  19  -3 -16-90.2365 193.089   1
  19  -3 -15 230.227 340.784   1
  19  -3 -14 590.041 390.190   1
  19  -3 -13 1797.41 745.131   1
 -19  -3  12 770.472 439.687   4
 -19   3  12 1038.76 553.945   2
  19  -3 -12 531.500 367.912   1
 -19  -3  11 310.324 369.965   4
  19  -3 -11-43.3856 129.473   1
 -19   3  11-284.076 428.464   2
 -19  -3  10 123.048 301.930   4
 -19  -3  10 83.1103 120.839   2
 -19   3  10 148.027 229.089   2
  19  -3 -10-277.665 253.996   1
 -19  -3   9 994.593 465.988   4
  19  -3  -9 254.810 287.331   1
 -19  -3   9 566.441 323.433   2
 -19   3   9 1313.53 627.955   2
 -19  -3   8 85.0406 126.911   4
 -19  -3   8-107.100 173.805   2
 -19   3   8-132.608 150.645   2
 -19  -3   7-139.918 348.330   4
 -19   3   7 139.536 283.511   2
 -19  -3   7 12.1752 104.223   2
 -19  -3   6 1546.16 585.094   4
 -19   3   6 1119.62 591.455   2
 -19  -3   6 1152.43 489.721   2
 -19   3   5 234.382 461.516   2
 -19  -3   5-58.5656 261.728   4
 -19  -3   5-121.555 64.3921   2
 -19  -3   4 304.106 235.169   4
 -19  -3   4-1.24051 247.063   2
 -19   3   4 492.760 431.366   2
 -19  -3   3 3788.97 915.545   4
 -19  -3   3 3721.17 868.952   2
 -19   3   3 5512.05 1229.21   2
 -19  -3   2 5342.14 1085.94   2
 -19   3   2 6867.66 1350.50   2
 -19  -3   2 5946.07 1171.15   4
 -19  -3   1 19.8647 155.396   2
 -19   3   1 521.354 359.280   2
 -19  -3   0 298.995 253.662   2
 -19   3   0-197.670 96.1398   2
 -19   3  -1 91.2920 223.628   2
 -19  -3  -1-252.433 361.149   2
 -19   3  -2 2928.94 818.250   2
 -19  -3  -2 2101.90 733.800   2
 -19   3  -3 133.248 240.415   2
 -19  -3  -3 716.177 470.835   2
 -19   3  -3-500.689 245.114   5
 -19   3  -4-213.584 275.726   2
 -19  -3  -4 38.1453 166.357   2
 -19   3  -4 355.224 310.481   5
 -19   3  -5-192.510 298.613   2
 -19  -3  -5 246.519 246.859   2
 -19   3  -5 395.448 531.584   5
 -19   3  -6 713.712 472.092   2
 -19  -3  -6 185.258 104.973   2
 -19   3  -6 635.376 503.355   5
 -19   3  -7 88.9128 144.840   2
 -19  -3  -7-501.510 453.186   2
 -19   3  -7-641.815 477.036   5
 -19   3  -8-246.898 260.111   2
 -19   3  -8 172.181 222.535   5
 -19   3  -9 414.198 361.044   2
 -19   3  -9 76.8714 334.432   5
 -19   3 -10 341.081 297.959   2
 -19   3 -11-533.033 398.491   2
  19  -4 -17-239.490 93.3302   1
  19  -4 -16 26.2419 328.225   1
 -19  -4  16 115.988 327.266   4
 -19  -4  15-152.116 427.455   4
  19  -4 -15-309.706 400.733   1
 -19  -4  14-254.606 430.934   4
  19  -4 -14 295.711 309.299   1
 -19  -4  13 648.659 495.524   4
  19  -4 -13 1753.96 741.565   1
 -19  -4  12 28.0835 245.801   4
  19  -4 -12 956.542 554.300   1
 -19  -4  11 187.811 145.940   4
 -19   4  11-468.589 556.622   2
 -19  -4  10 159.850 311.736   4
 -19   4  10-259.233 563.848   2
 -19  -4   9 621.779 430.100   4
 -19   4   9 999.239 591.414   2
 -19  -4   8-45.5462 99.8536   4
 -19   4   8 234.579 438.074   2
 -19  -4   7 1035.34 477.201   4
 -19   4   7 2103.61 879.746   2
 -19  -4   6-70.7153 225.104   4
 -19   4   6 192.372 244.435   2
 -19  -4   5 517.325 331.672   4
 -19   4   5 435.993 405.050   2
 -19   4   4 883.218 614.357   2
 -19  -4   4 86.6276 234.470   4
 -19  -4   3 1284.37 665.139   4
 -19  -4   3 1801.18 636.070   2
 -19   4   3 1809.16 750.341   2
 -19   4   2 309.704 368.443   2
 -19  -4   2 7.20344 95.3095   2
 -19   4   1 1959.13 809.310   2
 -19  -4   1 1332.59 578.596   2
 -19   4   0 4345.19 1102.89   2
 -19  -4   0 3211.96 922.440   2
 -19   4  -1 558.089 430.406   2
 -19  -4  -1 336.671 264.752   2
 -19   4  -2 1291.50 557.967   2
 -19  -4  -2 1393.69 616.108   2
 -19   4  -2 2332.69 953.235   5
 -19   4  -3 1218.45 552.602   2
 -19   4  -3 1067.17 605.606   5
 -19   4  -4-80.5591 206.989   2
 -19   4  -4 754.530 555.127   5
 -19   4  -5-151.985 277.284   2
 -19   4  -5 236.347 388.304   5
 -19  -5  12 287.472 295.820   4
 -19   5  12-1155.75 821.938   2
 -19  -5  11 46.7934 221.143   4
 -19   5  11 470.292 511.139   2
 -19  -5  10-212.168 376.249   4
 -19   5  10-28.8410 169.494   2
 -19  -5   9-59.7838 157.334   4
 -19   5   9 598.622 581.532   2
 -19  -5   8 1208.99 635.589   4
 -19   5   8 519.610 491.999   2
 -19  -5   7 921.157 581.638   4
 -19   5   7 3.62816 259.174   2
 -19  -5   6 1042.23 571.121   4
 -19   5   6 655.226 544.416   2
 -19  -5   5-99.4663 357.926   4
 -19   5   5 209.826 350.574   2
 -19  -5   4 199.154 246.299   4
 -19   5   4 311.902 408.341   2
 -19   5   3-518.592 468.484   2
 -19  -5   3-45.4361 237.746   4
 -19   5   2 114.105 120.997   2
 -20   0  27-357.192 526.199   3
 -20   0  26-491.245 480.405   3
[truncated: 70,076 more chars]
